# Supplementary material for: Oral aged garlic (Allium sativum) alleviates ulcerative colitis in mice by improving gut homeostasis
Source: Royal Society of Chemistry journal article supplement (doi:10.1039/d4fo03105a), 2024-01-01
Supplement: d4fo03105a1.pdf [file d4fo03105a1.pdf]

## 1 Supplementary figures

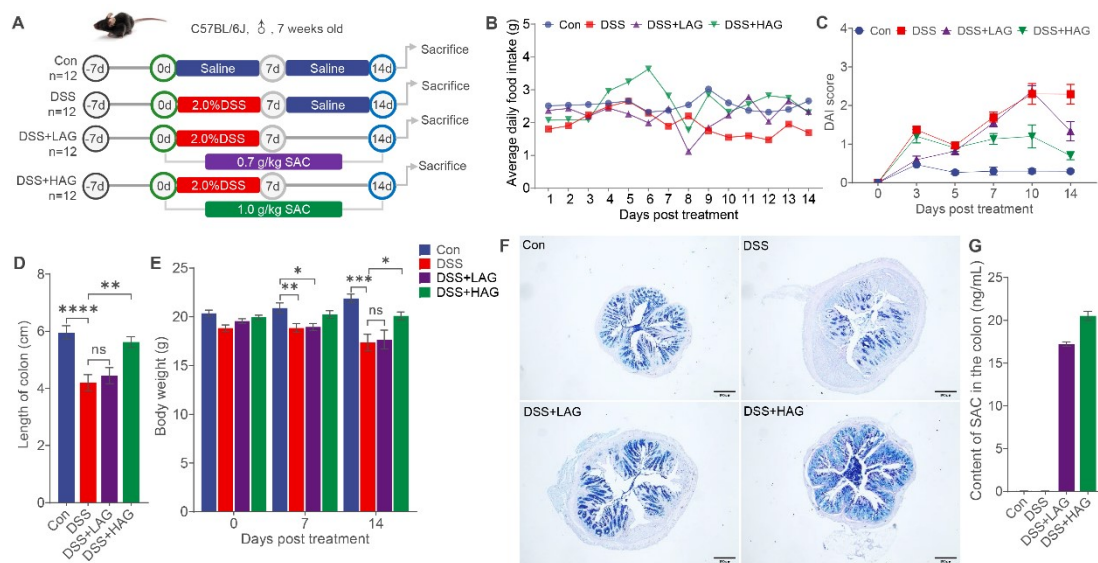

2

3 **Supplementary Fig.1** Protective effect of oral different doses of AG on DSS-induced  
 4 experimental colitis. (A) Diagram illustrating the mouse model of colitis employed in  
 5 this study. Oral phosphate buffer saline (PBS), low dose of aged garlic (LAG) and  
 6 high dose of aged garlic (HAG) treatments are indicated; Average daily food intake  
 7 (B), DAI score (C), length of colon (D), and body weight (E) from each group after  
 8 treatment. (F) Alcian blue stained colon sections from different groups. (G) Content  
 9 of S-allyl-L-cysteine (SAC) from different groups.

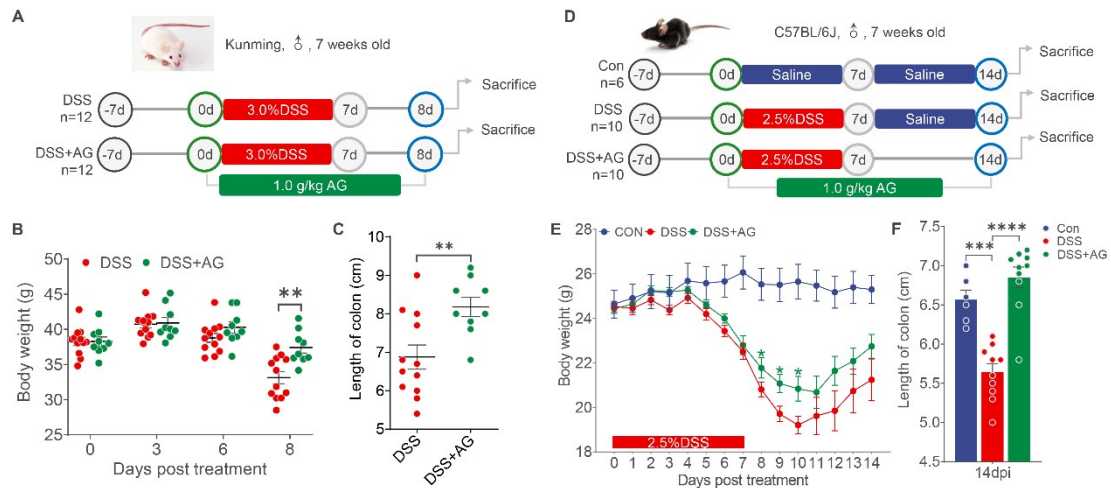

10

11 **Supplementary Fig.2** Protective effect of oral AG on different content of DSS-  
 12 induced experimental colitis. (A) Diagram illustrating the Kunming mouse model of  
 13 colitis employed in this study. Oral 3% dextran sulphate sodium salt (DSS), 1.0 g/kg  
 14 aged garlic (AG) treatments are indicated; Body weight (B) and length of colon (C)  
 15 from each group after treatment. (D) Diagram illustrating the C57BL/6 J mouse model  
 16 of colitis employed in this study. Oral 2.5% DSS, 1.0 g/kg AG treatments are  
 17 indicated; Body weight (E) and length of colon (F) from each group after treatment.

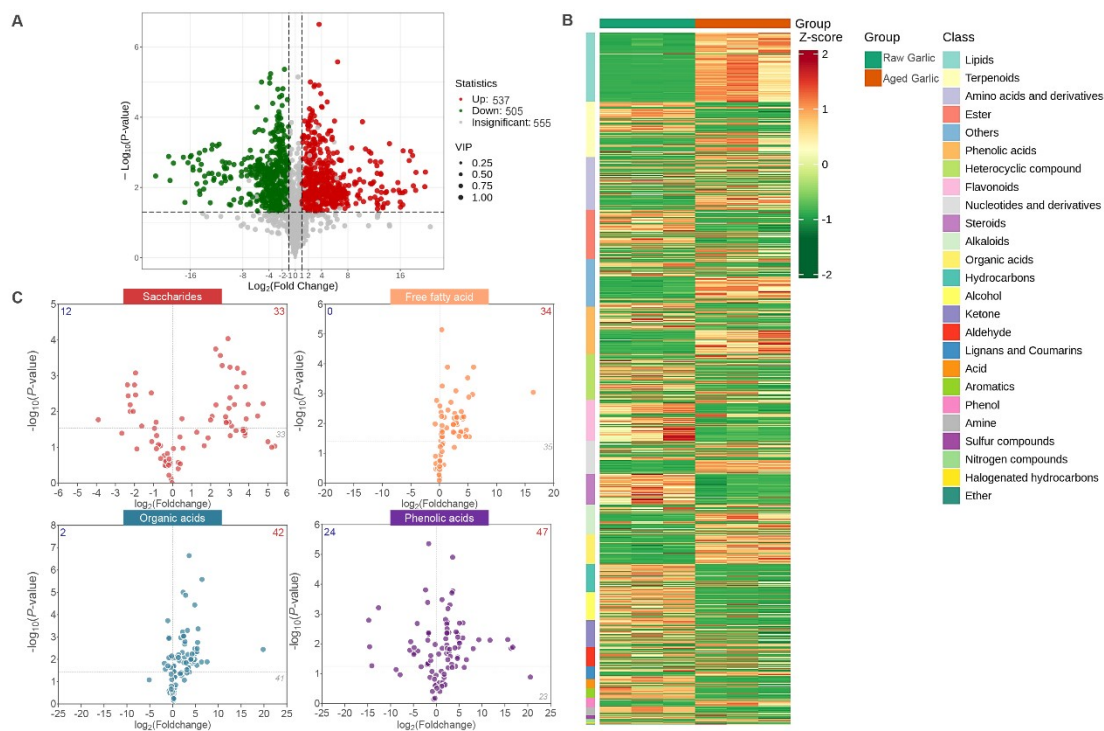

18

19 **Supplementary Fig.3** Comparison of raw garlic and aged garlic bioactive compounds  
 20 composition. Volcano map (A) and heatmap (B) showed composition of up-regulated  
 21 and down-regulated compounds in aged garlic. (C) Volcano map showed the highly  
 22 up-regulated compounds of saccharides, free fatty acid, organic acid, and phenolic  
 23 acids in the aged garlic.

24

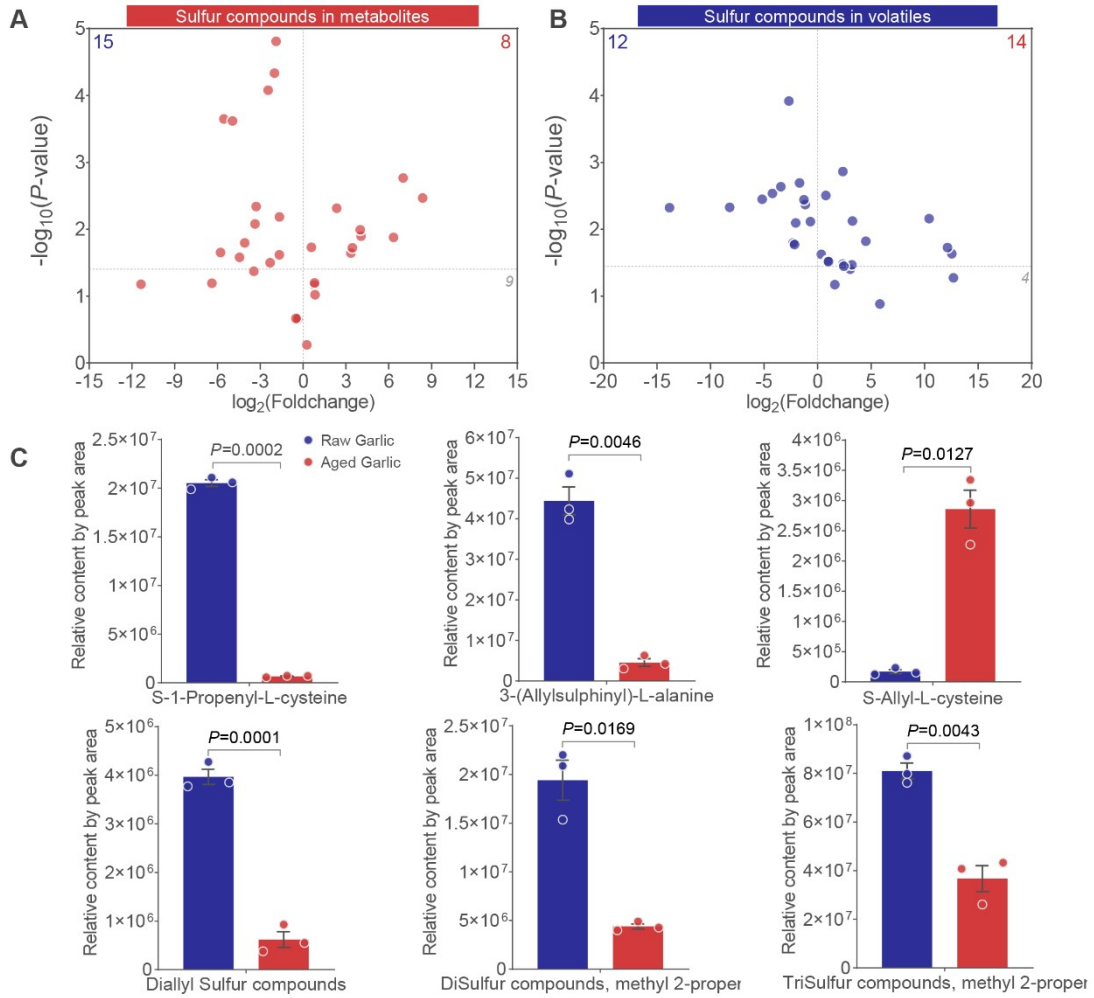

25

26 **Supplementary Fig.4** The changes and relative abundance of sulfur compounds  
 27 detected in garlic before and after aging process. Unregulated and downregulated  
 28 sulfur compounds detected by LC-MS (A) and GC-MS (B). (C) Differences of  
 29 relative contents of specific garlic sulfur compounds between raw garlic and aged  
 30 garlic.

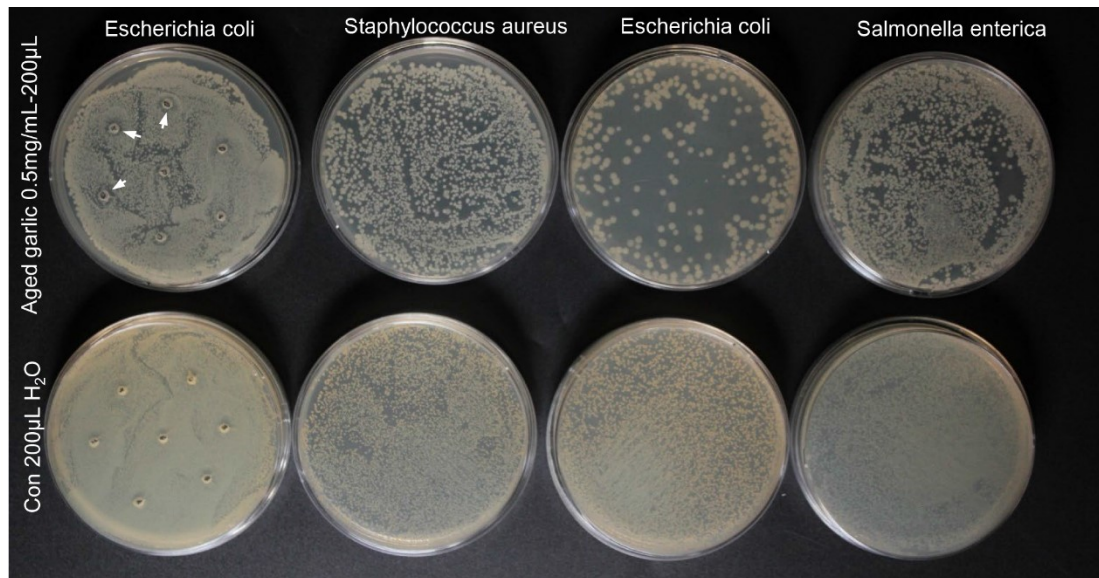

31  
32 **Supplementary Fig.5** The anti-bacteria effect of water extract from AG. Water  
33 extract of AG at 0.5 mg/mL added in the culture medium can partly inhibited  
34 proliferations of *Escherichia coli*, *Staphylococcus aureus*, and *Salmonella enterica*.

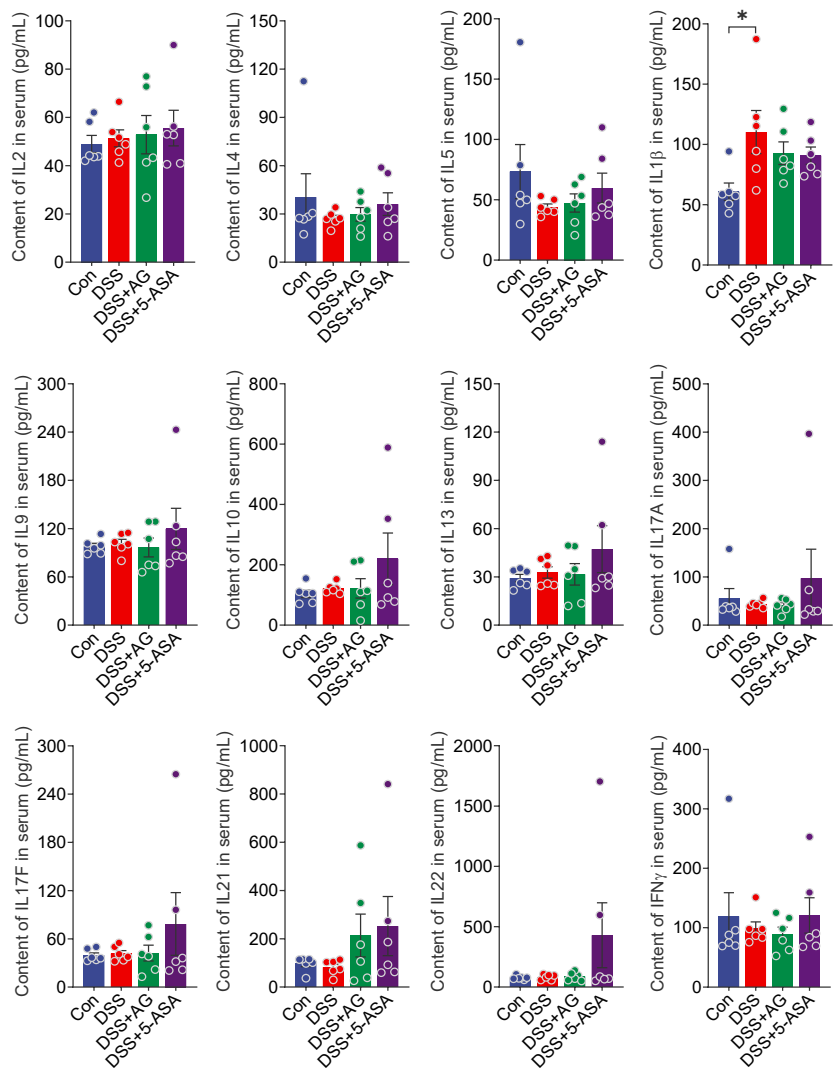

35  
 36 **Supplementary Fig.6** Comparison of cytokines in the serum between different  
 37 treatments. DSS significantly increased IL-1β expression but oral AG and 5-ASA not  
 38 deduced its expression on day 14. Other cytokines showed no significant changes  
 39 among different groups.

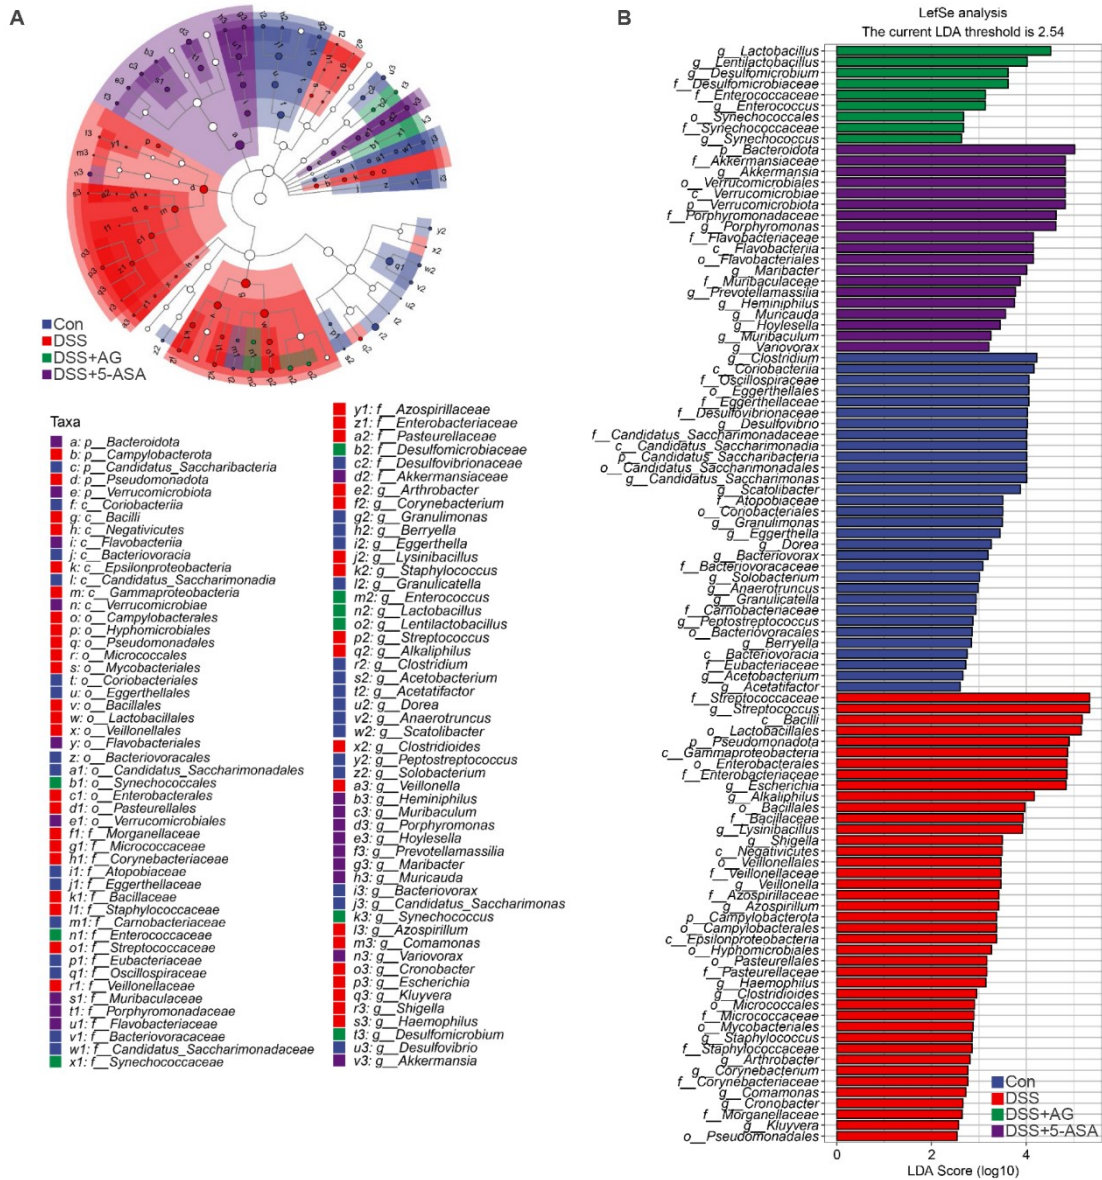

40

41 **Supplementary Fig.7** Lefse analysis of composition and relative abundance of fecal  
 42 bacteria. (A) Cladogram showed the composition of bacteria induced by DSS, and  
 43 attenuation of fecal bacteria after oral treatment of AG and 5-ASA. (B) Effect size  
 44 rank of the relative abundance of differential bacterial species in each group.

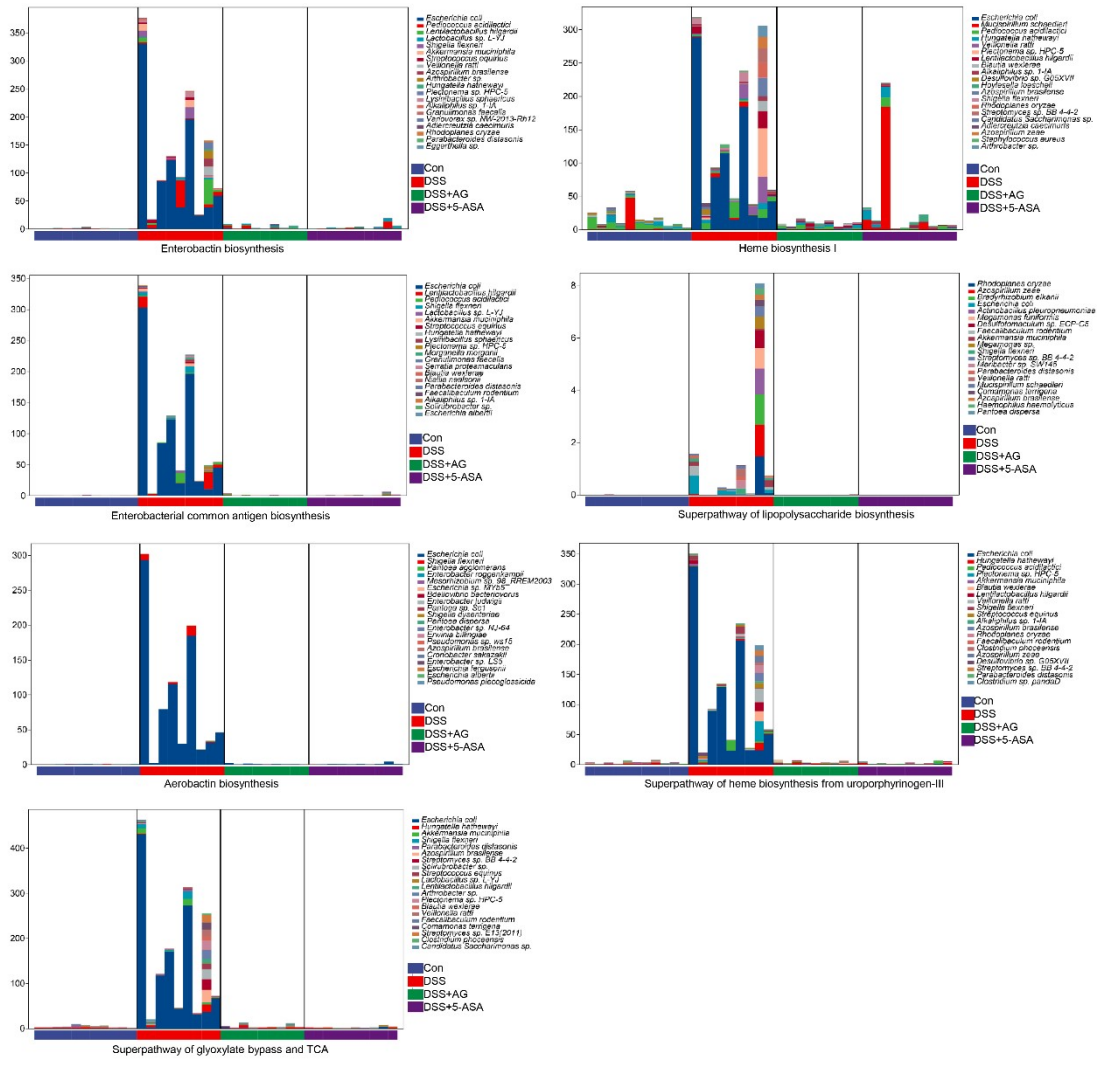

45

46 **Supplementary Fig.8** The contribution of screened bacteria species for the enriched  
 47 metabolic pathways between different groups. The metabolic pathways were  
 48 significantly enriched in the DSS group, and were closely related to *Escherichia coli*.  
 49



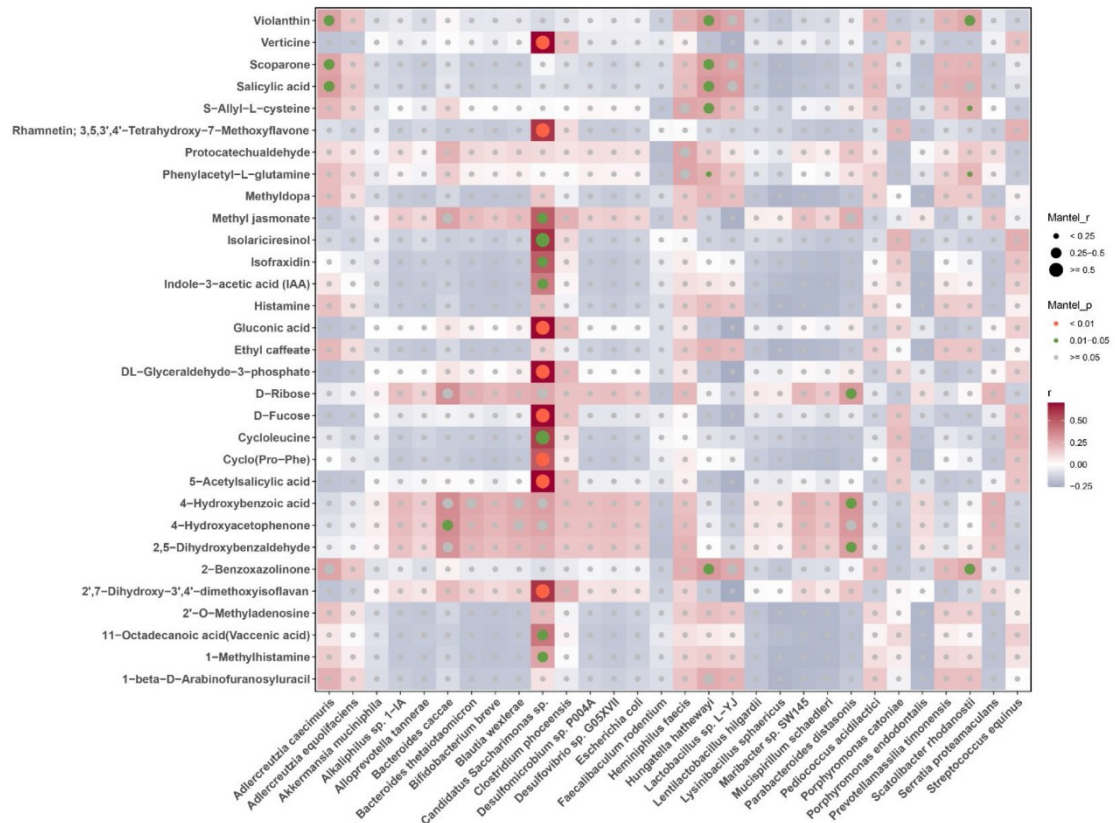

50

51 **Supplementary Fig.9** The association between bioactive compounds of AG and  
 52 modulated bacterial species. The bioactive compounds in AG positively correlated  
 53 with the probiotics, such as *candidatus saccharimonas*, *Hungateella hathewayi*,  
 54 *Parabacteroides distasonis*, *Scatolibacter rhodanostii*, *Bacteroides caccae*, and  
 55 *Adlercreutzia caecimuris*. *Escherichia coli*, *Escherichia coli*, *Lysinibacillus*  
 56 *sphaericus*, *Streptococcus equinus*, and *Alkaliphilus sp. 1-IA* had a strong negative  
 57 correlation with the bioactive compounds of AG, especially S-Allyl-L-cysteine.

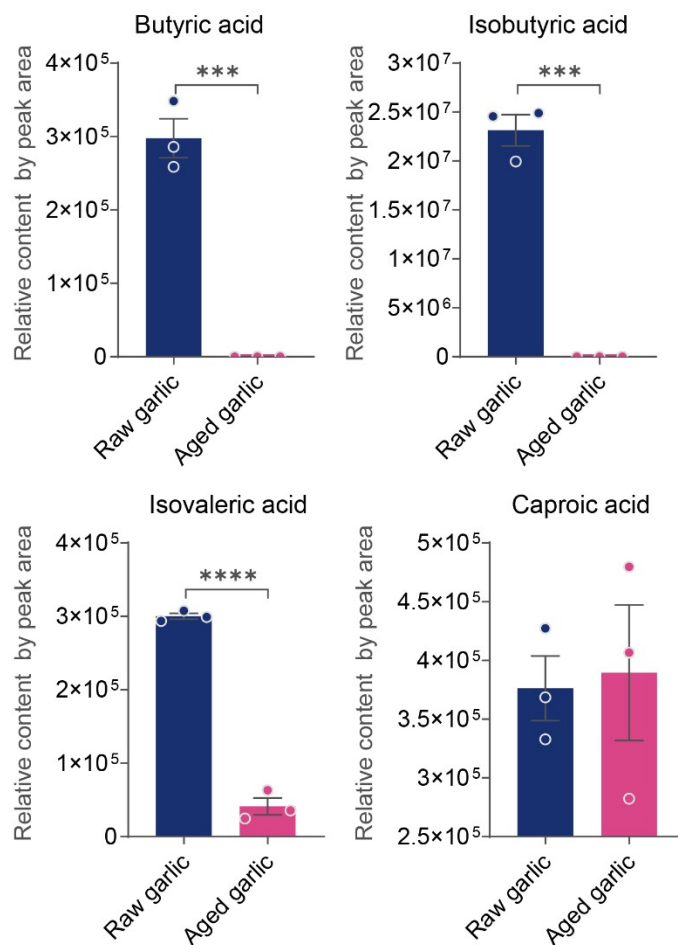

58

59 **Supplementary Fig.10** The relative content of butyric acid, isobutyric acid, isovaleric  
 60 acid, and caproic acid detected in aged garlic by GC-MS.

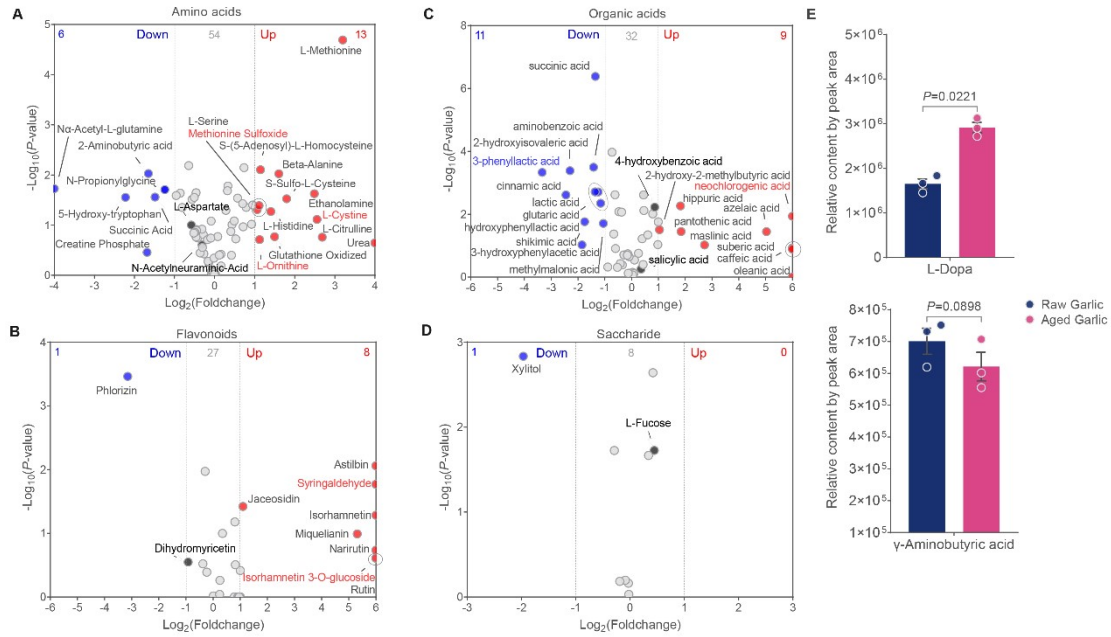

61

62 **Supplementary Fig.11** Quantification of amino acids (A), organic acids (B),  
 63 flavonoids (C), and saccharide (D) in the single-clove and multi-clove aged garlic by  
 64 LC-MS. (E) The relative content of L-DOPA and  $\gamma$ -aminobutyric acid detected in  
 65 aged garlic by LC-MS.

66
