# Supplementary material for: Oral aged garlic (Allium sativum) alleviates ulcerative colitis in mice by improving gut homeostasis
Source: Royal Society of Chemistry journal article supplement (doi:10.1039/d4fo03105a), 2024-01-01
Supplement: d4fo03105a2.xlsx [file d4fo03105a2.xlsx]

## Sheet: Table S1
Table S1. Metabolites and volatile compounds detected in raw and aged garlic by LC-MS and GC-MS.
Index	Platform	Formula	Compounds	Class I	Class II	CAS	raw garlic-1	raw garlic-2	raw garlic-3	aged garlic-1	aged garlic-2	aged garlic-3	VIP	P-value	Fold_Change	Log2FC	Type
pmf0440	UPLC-MS/MS	C10H10O2	4-MethoxycinnaMaldehyde	Phenolic acids	Phenolic acids	1963-36-6	4.17008e+06	4.24218e+06	4.20808e+06	4.00484e+06	4.10296e+06	4.16455e+06	0.829417	0.114548	0.972426	-0.0403397	insig
mws0014	UPLC-MS/MS	C10H10O4	Ferulic acid	Phenolic acids	Phenolic acids	537-98-4	1.57127e+06	1.41854e+06	2.82261e+06	221481	218547	142219	1.07696	0.0588812	0.100173	-3.31944	down
Lmdn003756	UPLC-MS/MS	C10H10O4	Methyl caffeate	Phenolic acids	Phenolic acids	3843-74-1	152608	230826	157145	4243.55	5013.65	9230.68	1.09159	0.0202426	0.0342001	-4.86985	down
MWSslk097	UPLC-MS/MS	C10H10O4	Dimethyl phthalate	Phenolic acids	Phenolic acids	131-11-3	1.21136e+06	1.27802e+06	1.28877e+06	1.02149e+06	1.17438e+06	1.24602e+06	0.680157	0.22667	0.910998	-0.13448	insig
Zblp001554	UPLC-MS/MS	C10H11NO3	3,3-dimethoxyindolequinone	Alkaloids	Plumerane	-	9339.43	10964.2	21624.2	1.69938e+06	1.49409e+06	1.69153e+06	1.09838	0.00167529	116.509	6.8643	up
MWS0720	UPLC-MS/MS	C10H12N2O2	Trans-3-Hydroxycotinine	Alkaloids	Pyrrole alkaloids	34834-67-8	5096.04	11436.1	12763.5	981004	1.08169e+06	946264	1.09636	0.00161643	102.71	6.68243	up
pme2776	UPLC-MS/MS	C10H12N4O4	2'-Deoxyinosine	Nucleotides and derivatives	Nucleotides and derivatives	890-38-0	164564	258144	226896	9	9	9	1.10446	0.0157574	4.15638e-05	-14.5543	down
mws1060	UPLC-MS/MS	C10H12N4O5	9-(Arabinosyl)hypoxanthine	Nucleotides and derivatives	Nucleotides and derivatives	7013-16-3	936819	1.05586e+06	731794	3.11626e+06	3.86736e+06	3.83444e+06	1.08596	0.00365739	3.9707	1.98939	up
mws0668	UPLC-MS/MS	C10H12N4O6	Xanthosine	Nucleotides and derivatives	Nucleotides and derivatives	146-80-5	4.7874e+06	5.41062e+06	4.6881e+06	2.56942e+06	2.71192e+06	2.28565e+06	1.08322	0.00213682	0.508326	-0.976174	insig
mws0884	UPLC-MS/MS	C10H12N5O6P	Cyclic 3',5'-Adenylic acid	Nucleotides and derivatives	Nucleotides and derivatives	60-92-4	10523.7	10861.5	14731.6	22723.6	19571.2	23643.2	1.02599	0.0056844	1.82569	0.868445	insig
Latp011219	UPLC-MS/MS	C10H12O	3,5-Dimethyl-2,3-dihydrobenzofuran	Others	Others	-	769837	794482	814915	782400	894451	730711	0.0771102	0.865794	1.01191	0.0170755	insig
MWS5238	UPLC-MS/MS	C10H12O2	4-Phenylbutyric acid	Organic acids	Organic acids	1821-12-1	125438	114904	173096	205891	169055	212359	0.865192	0.0655663	1.42054	0.506437	insig
mws0459	UPLC-MS/MS	C10H12O2	Eugenol	Phenolic acids	Phenolic acids	97-53-0	178784	217685	265205	9	9	9	1.10457	0.0125957	4.08056e-05	-14.5809	down
Zblp002750	UPLC-MS/MS	C10H12O3	Methyl-3-(3-hydroxyphenyl)Propionate	Phenolic acids	Phenolic acids	61389-68-2	245880	209001	152815	1.4103e+06	1.47154e+06	1.16057e+06	1.09037	0.00418826	6.65201	2.73379	up
mws0093	UPLC-MS/MS	C10H12O3	Coniferyl alcohol	Phenolic acids	Phenolic acids	458-35-5	855673	1.05806e+06	1.17795e+06	18165.7	19130.2	26926.3	1.10155	0.00852861	0.0207726	-5.58918	down
pmb0532	UPLC-MS/MS	C10H13N4O8P	Inosine 5'-monophosphate	Nucleotides and derivatives	Nucleotides and derivatives	131-99-7	345658	338122	429093	22841.4	15520.6	11298.3	1.09403	0.00614897	0.0446236	-4.48605	down
pme2060	UPLC-MS/MS	C10H13N5	N6-Isopentenyladenine	Nucleotides and derivatives	Nucleotides and derivatives	2365-40-4	11127.4	6293.11	13181	76596.6	97689.1	66747.9	1.07481	0.0131968	7.87654	2.97756	up
pme3961	UPLC-MS/MS	C10H13N5O3	2'-Deoxyadenosine	Nucleotides and derivatives	Nucleotides and derivatives	958-09-8	2.26971e+06	3.57781e+06	3.41808e+06	423470	435554	256540	1.08054	0.0205404	0.120399	-3.05411	down
MWSmce116	UPLC-MS/MS	C10H13N5O3	5'-Deoxyadenosine	Nucleotides and derivatives	Nucleotides and derivatives	4754-39-6	88065	161189	92353.6	324214	498406	504352	1.04148	0.0194241	3.88449	1.95773	up
mws1715	UPLC-MS/MS	C10H13N5O3	Cordycepin (3'-Deoxyadenosine)	Nucleotides and derivatives	Nucleotides and derivatives	73-03-0	2.26971e+06	3.57781e+06	3.41808e+06	423470	435554	256540	1.08054	0.0205404	0.120399	-3.05411	down
pme1184	UPLC-MS/MS	C10H13N5O4	2'-Deoxyguanosine	Nucleotides and derivatives	Nucleotides and derivatives	961-07-9	2.497e+06	3.14713e+06	3.59217e+06	817558	978809	152528	0.919497	0.00459816	0.211004	-2.24466	insig
pme0230	UPLC-MS/MS	C10H13N5O4	Adenosine	Nucleotides and derivatives	Nucleotides and derivatives	58-61-7	106058	92714.2	82505.4	1.52445e+07	1.63778e+07	1.28113e+07	1.10401	0.00506992	157.97	7.30351	up
pme1178	UPLC-MS/MS	C10H13N5O5	Guanosine	Nucleotides and derivatives	Nucleotides and derivatives	118-00-3	4.78233e+06	4.19826e+06	4.05498e+06	3.16845e+06	3.77694e+06	1.69728e+06	0.752179	0.129053	0.663007	-0.592904	insig
mws0724	UPLC-MS/MS	C10H13N5O6	8-Hydroxyguanosine	Nucleotides and derivatives	Nucleotides and derivatives	3868-31-3	5202.69	5267.55	2412.52	4.16514e+06	4.53105e+06	2.72397e+06	1.10069	0.0204008	886.469	9.79193	up
MWS1771	UPLC-MS/MS	C10H13NO3	L-Tyrosine methyl ester	Amino acids and derivatives	Amino acids and derivatives	1080-06-4	51715.2	57520.1	49880	320552	287436	275762	1.10216	0.00243623	5.55415	2.47357	up
pme0109	UPLC-MS/MS	C10H13NO4	Methyldopa	Amino acids and derivatives	Amino acids and derivatives	555-30-6	1.0419e+06	1.55935e+06	1.87604e+06	7.35183e+06	8.95609e+06	4.5549e+06	1.04419	0.046904	4.65969	2.22024	up
Lmhp001430	UPLC-MS/MS	C10H14N2O4	Cyclo(Pro-Glu)	Amino acids and derivatives	Amino acids and derivatives	-	112233	97915.6	112342	416501	442693	494102	1.0997	0.00319636	4.19638	2.06915	up
pme0264	UPLC-MS/MS	C10H14N2O5	Thymidine	Nucleotides and derivatives	Nucleotides and derivatives	50-89-5	65938	50782.3	62064.3	991222	1.04653e+06	1.37443e+06	1.10045	0.0119969	19.0854	4.2544	up
pme1187	UPLC-MS/MS	C10H14N2O6	5-Methyluridine	Nucleotides and derivatives	Nucleotides and derivatives	1463-10-1	18841.8	17355.8	19848.4	147778	143161	142839	1.10399	1.20876e-05	7.73968	2.95227	up
pme3184	UPLC-MS/MS	C10H14N5O6P	2'-Deoxyadenosine-5'-monophosphate	Nucleotides and derivatives	Nucleotides and derivatives	653-63-4	1.72604e+07	1.35145e+07	1.51517e+07	4.27516e+06	4.88702e+06	3.48262e+06	1.08565	0.00457086	0.275326	-1.86079	down
pmb0981	UPLC-MS/MS	C10H14N5O7P	Adenosine 5'-monophosphate	Nucleotides and derivatives	Nucleotides and derivatives	61-19-8	4.24024e+06	4.26453e+06	6.12023e+06	114284	138895	154475	1.10118	0.0168003	0.0278738	-5.16495	down
pmb0998	UPLC-MS/MS	C10H14N5O8P	Guanosine 5'-monophosphate	Nucleotides and derivatives	Nucleotides and derivatives	85-32-5	210675	183086	164267	72253.6	46014.1	71498.5	1.0575	0.00291286	0.340065	-1.55612	down
MWS2910	UPLC-MS/MS	C10H15N3O4	5-Methyl-2'-Deoxycytidine	Nucleotides and derivatives	Nucleotides and derivatives	838-07-3	79830.6	172975	253093	1.44343e+06	1.25127e+06	1.23174e+06	1.05256	0.000278992	7.76132	2.9563	up
pme2117	UPLC-MS/MS	C10H15N5O10P2	Adenosine 5'-diphosphate	Nucleotides and derivatives	Nucleotides and derivatives	58-64-0	862238	581415	800990	18991.3	70546.6	83311.5	1.04259	0.0116297	0.0770053	-3.6989	down
MWStz083	UPLC-MS/MS	C10H16N2O2	Cyclo(D-Val-L-Pro)	Amino acids and derivatives	Amino acids and derivatives	27483-18-7	9	9	9	2.01227e+06	2.24734e+06	2.23274e+06	1.1048	0.00123229	240458	17.8754	up
Lskp211278	UPLC-MS/MS	C10H16N2O5	Oxypinnatanine A	Alkaloids	Alkaloids	-	168458	219877	170845	513746	563136	635964	1.0852	0.0027978	3.06314	1.61501	up
MWSmce668	UPLC-MS/MS	C10H16N5O13P3	ATP; Adenosine 5'-Triphosphate	Nucleotides and derivatives	Nucleotides and derivatives	56-65-5	964965	558967	722421	6659.62	12699.1	18297.2	1.09117	0.0246366	0.0167631	-5.89856	down
MWS1962	UPLC-MS/MS	C10H16O	cis-Citral	Organic acids	Organic acids	5392-40-5	897278	940973	963951	909720	919794	813064	0.61234	0.263095	0.943036	-0.0846156	insig
Wmmn002441	UPLC-MS/MS	C10H16O3	(E)-Linalool-1-oic acid	Lipids	Free fatty acids	-	22911.6	32610.9	31045.6	147229	126394	252593	1.06657	0.063444	6.07864	2.60375	up
MWS201437	UPLC-MS/MS	C10H18N2O5	Leu-Asp	Amino acids and derivatives	Amino acids and derivatives	32949-40-9	4.88621e+06	7.65538e+06	9.83808e+06	8.40517e+06	8.74934e+06	9.25149e+06	0.489763	0.448674	1.17991	0.238677	insig
Lmrj002087	UPLC-MS/MS	C10H18N2O5	L-Isoleucyl-L-Aspartate	Amino acids and derivatives	Amino acids and derivatives	-	1.97025e+06	2.47207e+06	2.73669e+06	2.38917e+06	1.91753e+06	2.37039e+06	0.300585	0.576535	0.930085	-0.104565	insig
Zmdp001647	UPLC-MS/MS	C10H18N2O5	γ-Glutamyl-L-valine	Amino acids and derivatives	Amino acids and derivatives	-	7.4092e+07	7.44597e+07	7.63184e+07	1.97134e+07	2.26591e+07	1.00068e+07	1.04732	0.00348232	0.232932	-2.10202	down
Zmdp001663	UPLC-MS/MS	C10H18N2O5S	γ-glutamylmethionine	Amino acids and derivatives	Amino acids and derivatives	17663-87-5	2.21859e+06	2.40023e+06	2.28852e+06	77764.7	42337.2	26782.4	1.09095	0.000224922	0.021265	-5.55538	down
pmb2657	UPLC-MS/MS	C10H18N4O6	Argininosuccinic acid	Organic acids	Organic acids	2387-71-5	46875.3	119096	78893.5	61026.8	40846.5	45037.6	0.673673	0.254715	0.599968	-0.737041	insig
MWS201455	UPLC-MS/MS	C10H19N3O5	Asp-Lys	Amino acids and derivatives	Amino acids and derivatives	5891-51-0	1.01178e+06	973266	936076	8.68764e+06	6.02519e+06	8.51064e+06	1.09739	0.015702	7.95018	2.99099	up
MWS201387	UPLC-MS/MS	C10H20N6O4	Asn-Arg	Amino acids and derivatives	Amino acids and derivatives	2478-01-05	203217	235713	261693	8.04506e+06	9.80947e+06	6.47334e+06	1.10144	0.0146193	34.7232	5.11783	up
pmf0348	UPLC-MS/MS	C10H20O3	2,6-Dimethyl-7-octene-2,3,6-triol	Others	Saccharides	73815-21-1	222205	206191	185127	1.4272e+06	1.13913e+06	1.72317e+06	1.09473	0.0180822	6.9916	2.80562	up
pmb0962	UPLC-MS/MS	C10H22N2O4	L-Lysine-Butanoic Acid	Amino acids and derivatives	Amino acids and derivatives	80407-71-2	1.89683e+06	3.01555e+06	2.55147e+06	309190	455135	356794	1.08632	0.0212155	0.150206	-2.73498	down
pmf0174	UPLC-MS/MS	C10H22O	1-Decanol*	Others	Saccharides	112-30-1	2.20279e+06	2.26566e+06	2.28662e+06	1.44566e+06	1.42789e+06	2.51748e+06	0.635844	0.33403	0.798073	-0.325408	insig
pmf0175	UPLC-MS/MS	C10H22O	2-Decanol*	Others	Saccharides	1120-06-5	2.18795e+06	2.24414e+06	2.15202e+06	2.30111e+06	2.27945e+06	2.22337e+06	0.795331	0.108907	1.03339	0.0473784	insig
mws0018	UPLC-MS/MS	C10H26N4	Spermine	Alkaloids	Alkaloids	71-44-3	937137	946398	1.32858e+06	1.24939e+06	809258	768118	0.373527	0.558343	0.880031	-0.184373	insig
HX1361	UPLC-MS/MS	C10H8O3	7-Methoxycoumarin	Lignans and Coumarins	Coumarins	531-59-9	2.84989e+06	2.57298e+06	4.33547e+06	201228	243438	355860	1.08694	0.0312183	0.082035	-3.60762	down
pme1651	UPLC-MS/MS	C10H9NO2	Indole-3-acetic acid (IAA)	Alkaloids	Plumerane	87-51-4	18137.2	5922.45	17676.9	386135	549883	261550	1.07226	0.0436057	28.6936	4.84266	up
mws0597	UPLC-MS/MS	C10H9NO3	5-Hydroxyindole-3-acetic acid	Alkaloids	Plumerane	54-16-0	107676	117159	65831.4	131483	87323.4	103898	0.299901	0.628669	1.11022	0.150851	insig
HX1351	UPLC-MS/MS	C11H10O4	Scoparone	Lignans and Coumarins	Coumarins	120-08-1	27744.1	10879.6	16578.4	284380	305009	200694	1.07914	0.0148049	14.3126	3.83921	up
mws1639	UPLC-MS/MS	C11H10O5	Isofraxidin	Lignans and Coumarins	Coumarins	486-21-5	2767.06	1232.85	1512.85	140421	72461.5	172765	1.08951	0.0503059	69.9555	6.12837	up
Lmhn003240	UPLC-MS/MS	C11H10O6	Benzoylmalic acid	Phenolic acids	Phenolic acids	22138-51-8	54503.1	57877.3	59283.7	9	9	9	1.10483	0.000614128	0.000157284	-12.6343	down
pme2244	UPLC-MS/MS	C11H11NO2	3-Indolepropionic acid	Alkaloids	Plumerane	830-96-6	319080	229672	409945	44562.6	39970.2	46715.6	1.08799	0.0336417	0.136903	-2.86877	down
pmb0818	UPLC-MS/MS	C11H11NO3	Methoxyindoleacetic acid	Alkaloids	Plumerane	3471-31-6	3.47717e+06	2.59243e+06	4.83224e+06	180622	107909	206935	1.08879	0.0332637	0.0454479	-4.45964	down
Zmbp002538	UPLC-MS/MS	C11H12N2O2	1-Methoxy-indole-3-acetamide	Alkaloids	Plumerane	-	2.44499e+07	1.79355e+07	3.21781e+07	85678.9	69793.2	69729.1	1.1026	0.0265048	0.00302026	-8.37111	down
mws0282	UPLC-MS/MS	C11H12N2O2	L-Tryptophan	Amino acids and derivatives	Amino acids and derivatives	73-22-3	1.8659e+07	1.39127e+07	2.58271e+07	18670.9	19472.2	16808.9	1.10329	0.0302745	0.000940979	-10.0536	down
pme1228	UPLC-MS/MS	C11H12N2O3	5-Hydroxy-L-tryptophan	Amino acids and derivatives	Amino acids and derivatives	56-69-9	349229	404390	448732	661194	722703	597703	1.03868	0.00565939	1.6481	0.720807	insig
pmb2620	UPLC-MS/MS	C11H12O4	3,4-Dimethoxycinnamic acid	Phenolic acids	Phenolic acids	2316-26-9	24481.1	18554.6	42785.1	9157.12	12799.3	10948.7	0.955157	0.134	0.383417	-1.38302	insig
mws1212	UPLC-MS/MS	C11H12O4	Ferulic acid methyl ester	Phenolic acids	Phenolic acids	2309-07-01	182063	229002	166065	130876	130187	181640	0.74959	0.153665	0.767074	-0.382562	insig
mws2184	UPLC-MS/MS	C11H12O4	Ethyl caffeate	Phenolic acids	Phenolic acids	102-37-4	3772.02	11750.7	5107.45	81827.4	77563.6	90130.7	1.06862	0.000169154	12.095	3.59634	up
MWSslk120	UPLC-MS/MS	C11H13NO3	N-Acetyl-DL-phenylalanine	Amino acids and derivatives	Amino acids and derivatives	2901-75-9	35981.8	138062	47903.5	1.17721e+06	1.08805e+06	853358	1.05875	0.00553071	14.0512	3.81262	up
mws0520	UPLC-MS/MS	C11H13NO4	N-Acetyl-L-tyrosine	Amino acids and derivatives	Amino acids and derivatives	537-55-3	14269	12632.5	6890.48	216069	214638	236451	1.09265	0.000426166	19.7431	4.30327	up
mws5042	UPLC-MS/MS	C11H14N2O3	L-Glycyl-L-phenylalanine	Amino acids and derivatives	Amino acids and derivatives	721-66-4	1.25262e+06	1.56892e+06	2.21167e+06	961576	1.0911e+06	819295	0.911599	0.116328	0.570603	-0.809441	insig
Zasp001180	UPLC-MS/MS	C11H14N2O4	γ-L-glutaminy-4-hydroxybenzene	Alkaloids	Alkaloids	30382-24-2	13144	7366.84	10938.5	253772	361529	364937	1.09666	0.0129181	31.1689	4.96203	up
pma3101	UPLC-MS/MS	C11H14NO6+	Nicotinate D-ribonucleoside	Others	Vitamin	17720-18-2	152852	129779	134686	19640.1	13085.4	34082.7	1.06	0.000259143	0.16009	-2.64304	down
mws0853	UPLC-MS/MS	C11H14O4	Sinapyl alcohol	Phenolic acids	Phenolic acids	537-33-7	61404.2	53591.7	30025.5	17874.2	19853.7	5437.08	0.896735	0.0506655	0.297646	-1.74833	insig
Lafp003256	UPLC-MS/MS	C11H14O5	3,4'-Dihydroxy-3',5'-dimethoxypropiophenone	Phenolic acids	Phenolic acids	136196-47-9	61758.5	88739.4	26912.9	4.31496e+07	3.24104e+07	3.56201e+07	1.09823	0.00731617	626.682	9.29159	up
pme1474	UPLC-MS/MS	C11H15N5O3S	5'-Deoxy-5'-(methylthio)adenosine	Nucleotides and derivatives	Nucleotides and derivatives	2457-80-9	2.80565e+07	2.03769e+07	2.73322e+07	4.18243e+07	3.03035e+07	1.8804e+07	0.298051	0.53541	1.20017	0.263243	insig
Hmhp001812	UPLC-MS/MS	C11H15N5O4	2'-O-Methyladenosine	Nucleotides and derivatives	Nucleotides and derivatives	2140-79-6	313208	398581	392106	4.10559e+07	4.60099e+07	3.36134e+07	1.10345	0.00806744	109.321	6.77243	up
MWS4354	UPLC-MS/MS	C11H15N5O4	N6-methyladenosine	Nucleotides and derivatives	Nucleotides and derivatives	1867-73-8	99602.2	65557.4	90916.6	4.85458e+07	5.13993e+07	3.86065e+07	1.10359	0.00699947	541.056	9.07963	up
pmb0197	UPLC-MS/MS	C11H15N5O5	N7-Methylguanosine	Nucleotides and derivatives	Nucleotides and derivatives	20244-86-4	835239	994851	1.04769e+06	109369	29966.9	55012.5	1.06643	0.00214774	0.067534	-3.88824	down
MWStz261	UPLC-MS/MS	C11H18N2O2	Cyclo(D-Leu-L-Pro)	Amino acids and derivatives	Amino acids and derivatives	36238-67-2	20228.9	17333.6	6265.61	4.5872e+07	4.12328e+07	4.23156e+07	1.10037	0.00105399	2952.91	11.5279	up
MWStz170	UPLC-MS/MS	C11H18N2O3	Cyclo(L-Leu-trans-4-hydroxy-L-Pro)	Amino acids and derivatives	Amino acids and derivatives	115006-86-5	9027.81	14596.3	12168	62863.6	79368.1	98142	1.08301	0.0195211	6.71583	2.74757	up
Zmdp001928	UPLC-MS/MS	C11H18N2O5S	γ-L-Glutamyl-S-(trans-1-propenyl)-L-cysteine	Amino acids and derivatives	Amino acids and derivatives	-	3.16634e+06	3.35898e+06	3.3923e+06	1.00909e+06	869637	794845	1.09778	1.54861e-05	0.269578	-1.89123	down
Zmdp001718	UPLC-MS/MS	C11H18N2O5S	γ-L-Glutamyl-S-allyl-L-cysteine	Amino acids and derivatives	Amino acids and derivatives	-	3.43963e+06	3.44361e+06	3.56616e+06	1.00845e+06	814590	771565	1.09685	4.64023e-05	0.248301	-2.00984	down
mws0582	UPLC-MS/MS	C11H19N3O6S	S-(Methyl)glutathione	Amino acids and derivatives	Amino acids and derivatives	2922-56-7	1.13726e+06	1.07517e+06	1.21908e+06	238325	249068	140007	1.07892	8.34028e-05	0.182835	-2.45138	down
pmb2857	UPLC-MS/MS	C11H19NO9	L-Glutamic acid-O-glycoside	Amino acids and derivatives	Amino acids and derivatives	-	128801	81885.6	195897	2.41846e+06	2.23792e+06	2.23924e+06	1.08826	5.21717e-05	16.9599	4.08406	up
mws0805	UPLC-MS/MS	C11H19NO9	N-Acetylneuraminic acid	Amino acids and derivatives	Amino acids and derivatives	131-48-6	25225.2	62454.9	22250.5	106874	86094.5	109577	0.948919	0.0203692	2.75214	1.46056	insig
Lmhp001461	UPLC-MS/MS	C11H20N2O3	L-Prolyl-L-Leucine	Amino acids and derivatives	Amino acids and derivatives	52899-07-7	229149	310749	284773	2.02652e+06	2.42124e+06	1.04277e+06	1.06032	0.0624805	6.65785	2.73506	up
Zmdp002216	UPLC-MS/MS	C11H20N2O5	L-γ-Glutamyl-L-leucine	Amino acids and derivatives	Amino acids and derivatives	2566-39-4	1.58007e+06	1.4138e+06	1.86544e+06	685287	749969	309401	0.972007	0.00552398	0.359034	-1.47781	insig
pmb2855	UPLC-MS/MS	C11H20N2O8	L-Glutamine-O-glycoside	Amino acids and derivatives	Amino acids and derivatives	-	676866	350214	305557	1.12745e+07	2.0202e+07	7.64387e+06	1.07871	0.0775188	29.3556	4.87556	up
MWS1900	UPLC-MS/MS	C11H20O4	Undecanedioic acid	Lipids	Free fatty acids	1852-04-6	88657.9	86366.8	103125	339929	383623	397244	1.09861	0.0019499	4.02947	2.01059	up
Lmhp001670	UPLC-MS/MS	C11H22N2O3	L-Valyl-L-Leucine	Amino acids and derivatives	Amino acids and derivatives	3989-97-7	2.24597e+06	3.55336e+06	4.4698e+06	2.80224e+06	2.94991e+06	3.20188e+06	0.260545	0.568915	0.871937	-0.197705	insig
mws0752	UPLC-MS/MS	C11H22O2	Undecylic Acid	Lipids	Free fatty acids	112-37-8	1.23892e+06	1.25733e+06	1.2808e+06	1.42477e+06	1.32111e+06	1.5476e+06	0.886996	0.114772	1.13672	0.184883	insig
Hmmp001310	UPLC-MS/MS	C11H9NO2	3-Indoleacrylic acid	Alkaloids	Plumerane	1204-06-4	5.85567e+06	4.02953e+06	7.6365e+06	38798.9	41415.4	24836.5	1.09965	0.0306931	0.00599547	-7.38191	down
Hmgp002327	UPLC-MS/MS	C11H9O2N	3-amino-2-naphthoic acid	Alkaloids	Alkaloids	-	6.15858e+06	4.36837e+06	7.31426e+06	20176.8	31400.9	8952.9	1.09433	0.0202671	0.00339274	-8.20333	down
mws1383	UPLC-MS/MS	C12H10N4O2	Lumichrome	Alkaloids	Alkaloids	1086-80-2	96582.5	94697.7	115311	94139.6	72438.3	79266	0.82432	0.0921877	0.801863	-0.318573	insig
HJAP106	UPLC-MS/MS	C12H11N5O	N6-(4-hydroxybenzyl)adnine riboside	Nucleotides and derivatives	Nucleotides and derivatives	-	3889	10594.2	4576.84	935199	807868	606748	1.09481	0.0147731	123.285	6.94585	up
Hmlp001371	UPLC-MS/MS	C12H14N2O3	Cyclo(Tyr-Ala)	Amino acids and derivatives	Amino acids and derivatives	21754-26-7	32032.7	5170.89	9	691412	775618	777923	0.878129	0.000511065	60.3278	5.91475	insig
pme0428	UPLC-MS/MS	C12H14O5	3,4,5-Trimethoxycinnamic acid	Phenolic acids	Phenolic acids	90-50-6	8075.32	2464.16	2601.18	26123.6	26319.6	20214.7	1.01709	0.00193993	5.52924	2.46708	up
pmn001669	UPLC-MS/MS	C12H14O5	Methyl sinapate	Phenolic acids	Phenolic acids	20733-94-2	9	9	9	35444.5	32429.1	26135.7	1.10464	0.00757514	3481.83	11.7656	up
pma1751	UPLC-MS/MS	C12H15NO7	N-(beta-D-Glucosyl)nicotinate	Others	Vitamin	-	72689.1	85180.4	73979.1	2.71598e+06	2.05486e+06	2.91038e+06	1.10232	0.0106852	33.1303	5.05008	up
zjgp122326	UPLC-MS/MS	C12H15NO7	Pyridine-4-formyl-O-β-D-glucopyranoside	Others	Others	-	243980	86225.4	89182.8	1.94539e+06	1.72138e+06	2.27153e+06	1.07107	0.0040422	14.1594	3.82369	up
MWS201447	UPLC-MS/MS	C12H16N2O3	Phe-Ala	Amino acids and derivatives	Amino acids and derivatives	3918-87-4	71437.5	57107	109681	206323	308523	150056	0.966313	0.0793855	2.79106	1.48081	insig
MWS201478	UPLC-MS/MS	C12H16N2O4	Phe-Ser	Amino acids and derivatives	Amino acids and derivatives	16053-39-7	484652	574914	778771	196467	429540	295483	0.891466	0.0535349	0.501263	-0.996361	insig
MWS201480	UPLC-MS/MS	C12H16N2O4	Tyr-Ala	Amino acids and derivatives	Amino acids and derivatives	730-08-5	99885.1	127690	134805	326808	429286	414349	1.07976	0.00831259	3.22987	1.69148	up
pme3472	UPLC-MS/MS	C12H16O7	Arbutin	Phenolic acids	Phenolic acids	497-76-7	530985	531261	456443	107447	174687	126397	1.07753	0.000406275	0.269002	-1.89431	down
pmb0952	UPLC-MS/MS	C12H17N4OS+	Thiamine (Vitamin B1)	Others	Vitamin	70-16-6	3.62454e+06	3.43449e+06	2.39546e+06	192426	210929	151041	1.09729	0.0160141	0.0586384	-4.09201	down
pme3967	UPLC-MS/MS	C12H17N5O5	2-(Dimethylamino)guanosine	Nucleotides and derivatives	Nucleotides and derivatives	2140-67-2	4.9578e+06	5.03379e+06	4.68404e+06	1.61095e+07	1.82681e+07	1.58498e+07	1.10124	0.0036139	3.4225	1.77505	up
Lmcp002302	UPLC-MS/MS	C12H17N5O5	N6-(2-Hydroxyethyl)adenosine	Nucleotides and derivatives	Nucleotides and derivatives	4338-48-1	4.63223e+06	4.75779e+06	4.29848e+06	1.49774e+07	1.69949e+07	1.41181e+07	1.0991	0.00522086	3.36709	1.7515	up
Zblp001009	UPLC-MS/MS	C12H17NO6	3-pyridine-methanol-O-β-D-glucopyranosyl	Alkaloids	Pyridine alkaloids	-	575093	709033	799419	603695	776689	452944	0.400447	0.509458	0.879908	-0.184575	insig
mws1375	UPLC-MS/MS	C12H21N3O6	Nicotianamine	Alkaloids	Alkaloids	34441-14-0	3.17941e+07	3.27395e+07	3.24513e+07	1.93804e+06	2.14259e+06	2.3408e+06	1.10407	7.60186e-06	0.0662106	-3.91679	down
Lmqn000351	UPLC-MS/MS	C12H22O10	Rutinose	Others	Saccharides	90-74-4	105870	86732.9	215498	1.43109e+06	1.23572e+06	664557	1.0463	0.0477156	8.16312	3.02912	up
mws0264	UPLC-MS/MS	C12H22O11	D-Trehalose	Others	Saccharides	99-20-7	4.32454e+07	4.57685e+07	5.15736e+07	9.94076e+06	9.95751e+06	7.31319e+06	1.09395	0.00179551	0.193555	-2.36918	down
Lmsn000381	UPLC-MS/MS	C12H22O11	D-Maltose	Others	Saccharides	69-79-4	7.76194e+07	8.22836e+07	9.06592e+07	2.39179e+07	2.3147e+07	1.79833e+07	1.09244	0.000835292	0.259609	-1.94559	down
MWSmce203	UPLC-MS/MS	C12H22O11	D-Cellobiose	Others	Saccharides	528-50-7	933805	1.08383e+06	1.40871e+06	782529	777077	650428	0.934596	0.0907569	0.645013	-0.632601	insig
pme0519	UPLC-MS/MS	C12H22O11	D-Sucrose	Others	Saccharides	57-50-1	4.70418e+07	4.92733e+07	6.1803e+07	1.13543e+07	1.27734e+07	9.71345e+06	1.09247	0.00998588	0.214024	-2.22415	down
mws1080	UPLC-MS/MS	C12H22O11	Galactinol	Others	Saccharides	3687-64-7	2.03757e+06	2.07373e+06	2.99312e+06	1.52266e+06	1.45938e+06	1.25821e+06	0.968215	0.0844927	0.596848	-0.744565	insig
mws1333	UPLC-MS/MS	C12H22O11	Melibiose	Others	Saccharides	585-99-9	2.79108e+07	2.95279e+07	3.35967e+07	6.39081e+06	6.34441e+06	5.3523e+06	1.09933	0.00364048	0.198687	-2.33143	down
MA10039641	UPLC-MS/MS	C12H22O11	Lactobiose	Others	Saccharides	63-42-3	7.73863e+07	7.85365e+07	9.27363e+07	2.41618e+07	2.18216e+07	1.86913e+07	1.09383	0.00343633	0.260094	-1.9429	down
mws5038	UPLC-MS/MS	C12H22O11	Isomaltulose	Others	Saccharides	13718-94-0	7.83544e+07	8.66704e+07	1.06467e+08	2.34076e+07	2.44211e+07	1.69413e+07	1.08224	0.00994576	0.238571	-2.06751	down
mws0474	UPLC-MS/MS	C12H22O4	Dodecanedioic aicd	Lipids	Free fatty acids	693-23-2	8547.77	7063.15	7973.86	9248.74	10584.3	10036.6	0.957851	0.0230437	1.26648	0.340821	insig
mws2523	UPLC-MS/MS	C12H23O14P	Trehalose 6-phosphate	Others	Saccharides	4484-88-2	370498	358214	798798	7.44863e+06	5.78762e+06	9.02699e+06	1.08029	0.0160209	14.5749	3.86541	up
mws1089	UPLC-MS/MS	C12H23O14P	Sucrose-6-phosphate	Others	Saccharides	-	567885	568384	512365	4.95109e+06	3.86391e+06	4.01346e+06	1.10134	0.00808535	7.78126	2.96	up
Lmhp002031	UPLC-MS/MS	C12H24N2O3	L-Leucyl-L-Leucine	Amino acids and derivatives	Amino acids and derivatives	3303-31-9	552348	1.39718e+06	796791	3.31946e+06	3.52465e+06	3.33171e+06	1.02885	0.00696258	3.70526	1.88957	up
MWS1983	UPLC-MS/MS	C12H24O11	Maltitol	Others	Saccharides	585-88-6	1.93373e+06	1.87128e+06	2.23188e+06	476548	595859	437973	1.09206	0.00181014	0.250191	-1.9989	down
pmb2640	UPLC-MS/MS	C12H24O2	Dodecanoic acid (Lauric acid)	Lipids	Free fatty acids	143-07-7	236131	256510	244243	294000	302985	292426	1.06379	0.00424765	1.20699	0.271412	insig
Hmcp003783	UPLC-MS/MS	C13H10N2O	1-Acetyl-β-carboline	Alkaloids	Plumerane	-	45658.6	50629.7	27906.3	2.58025e+06	2.54999e+06	2.02371e+06	1.09973	0.0058359	57.6028	5.84807	up
pmb2591	UPLC-MS/MS	C13H14N2O3	N-Acetyl-L-Tryptophan	Amino acids and derivatives	Amino acids and derivatives	1218-34-4	33622.4	28550.5	36860.9	32359.7	22978.7	7456.93	0.623077	0.23279	0.63408	-0.657264	insig
MWS4309	UPLC-MS/MS	C13H15N3O3	Glycyl-tryptophan	Amino acids and derivatives	Amino acids and derivatives	2390-74-1	594217	608463	675785	176062	107251	179553	1.07362	0.000169108	0.246407	-2.02089	down
mws0715	UPLC-MS/MS	C13H16N2O4	Phenylacetyl-L-glutamine	Amino acids and derivatives	Amino acids and derivatives	28047-15-6	9	9	9	988885	798044	512246	1.10431	0.0311423	85154.6	16.3778	up
mws0629	UPLC-MS/MS	C13H16N2O5	L-Aspartyl-L-Phenylalanine	Amino acids and derivatives	Amino acids and derivatives	13433-09-5	764870	933874	1.09868e+06	1.80392e+06	1.90116e+06	1.4041e+06	1.00257	0.0183247	1.82638	0.868989	insig
Hmln000659	UPLC-MS/MS	C13H16O10	3-O-Galloyl-D-glucose*	Phenolic acids	Phenolic acids	-	91614.7	116188	94239.4	36093.7	35304.6	24228.9	1.06925	0.00464996	0.316602	-1.65926	down
Lmfn000604	UPLC-MS/MS	C13H16O10	6-O-Galloyl-β-D-glucose*	Phenolic acids	Phenolic acids	13186-19-1	91614.7	116188	94239.4	36093.7	35304.6	24228.9	1.06925	0.00464996	0.316602	-1.65926	down
pmp000087	UPLC-MS/MS	C13H16O6	2-Feruloyl-sn-glycerol	Phenolic acids	Phenolic acids	-	33984.1	38044	48171.5	73578	117148	69342.7	0.981069	0.0834708	2.16364	1.11346	insig
pmb3142	UPLC-MS/MS	C13H16O8	Salicylic acid-2-O-glucoside	Phenolic acids	Phenolic acids	10366-91-3	5.26408e+06	5.92408e+06	8.72377e+06	2.92543e+06	3.40553e+06	3.98804e+06	0.968587	0.0846873	0.518232	-0.94833	insig
pmb2871	UPLC-MS/MS	C13H16O9	1-O-Gentisoyl-β-D-glucoside	Phenolic acids	Phenolic acids	23445-11-6	271258	357848	326291	551882	904556	175599	0.361975	0.39612	1.70823	0.772502	insig
Lmfp001509	UPLC-MS/MS	C13H16O9	1-O-Galloyl-rhamnose	Phenolic acids	Phenolic acids	-	21791.8	63762.5	68132.6	96334.3	100934	53395.7	0.616596	0.201204	1.63101	0.705762	insig
pme0220	UPLC-MS/MS	C13H20O3	Methyl jasmonate	Organic acids	Organic acids	1211-29-6	7922.22	9299.27	8800.61	224786	287340	270717	1.10325	0.00543644	30.0838	4.91091	up
MWS5231	UPLC-MS/MS	C13H24O4	Tridecanedioic acid	Lipids	Free fatty acids	505-52-2	1.29276e+06	1.2656e+06	1.26929e+06	1.34096e+06	1.35111e+06	1.36447e+06	1.0615	0.00260162	1.0598	0.0837913	insig
mws2120	UPLC-MS/MS	C13H8O8	Brevifolin carboxylic acid	Phenolic acids	Phenolic acids	18490-95-4	31949	15099.1	16244.2	481149	593145	488166	1.09233	0.00446861	24.6864	4.62565	up
Lmhp003064	UPLC-MS/MS	C14H16N2O2	Cyclo(Pro-Phe)	Amino acids and derivatives	Amino acids and derivatives	3705-26-8	746.713	9400.05	2434.06	3.60908e+06	4.27298e+06	3.29771e+06	1.08289	0.00591324	888.635	9.79545	up
Lmrj002793	UPLC-MS/MS	C14H16N2O4	Cyclo(Phe-Glu)	Amino acids and derivatives	Amino acids and derivatives	-	558419	735878	920029	986751	974309	1.10358e+06	0.832402	0.0983706	1.384	0.468848	insig
pme3337	UPLC-MS/MS	C14H17N5O8	Succinyladenosine	Nucleotides and derivatives	Nucleotides and derivatives	4542-23-8	3.31764e+06	4.58374e+06	3.80325e+06	4.21596e+06	3.3881e+06	3.13916e+06	0.343475	0.55076	0.917861	-0.123652	insig
Zmdn001564	UPLC-MS/MS	C14H18N2O5	γ-Glutamylphenylalanine	Amino acids and derivatives	Amino acids and derivatives	7432-24-8	1.03198e+07	1.08658e+07	1.23343e+07	3.14994e+06	3.68917e+06	2.06607e+06	1.06672	0.0005644	0.265668	-1.9123	down
Zmdp001857	UPLC-MS/MS	C14H18N2O6	γ-Glutamyltyrosine	Amino acids and derivatives	Amino acids and derivatives	7432-23-7	3.31384e+07	2.01679e+07	3.34253e+07	8.98638e+06	8.7393e+06	4.58348e+06	1.02452	0.0293405	0.257221	-1.95892	down
Cmzp002057	UPLC-MS/MS	C14H18O8	6-O-Acetylarbutin	Phenolic acids	Phenolic acids	10338-88-2	9	9	9	744247	929711	613109	1.10462	0.0142054	84706.2	16.3702	up
Zmhn001883	UPLC-MS/MS	C14H18O9	Vanillic acid-4-O-glucoside	Phenolic acids	Phenolic acids	32142-31-7	560079	459955	720952	55855.6	23218.9	25992.9	1.08024	0.0173979	0.0603494	-4.05052	down
pmb0801	UPLC-MS/MS	C14H19NO9	4-Pyridoxic acid-O-glucoside	Others	Vitamin	-	857031	908713	888667	4.39725e+06	4.66103e+06	3.97048e+06	1.10278	0.00322456	4.90834	2.29524	up
Lmhp002001	UPLC-MS/MS	C14H20N2O3	L-Valyl-L-Phenylalanine	Amino acids and derivatives	Amino acids and derivatives	3918-92-1	217904	229982	342035	536468	571815	544358	1.03314	0.0135108	2.09216	1.06499	up
pme1286	UPLC-MS/MS	C14H20N6O5S	S-(5'-Adenosy)-L-homocysteine	Amino acids and derivatives	Amino acids and derivatives	979-92-0	146234	178907	206811	320314	371646	231936	0.934682	0.0683651	1.7368	0.796434	insig
Hmtn001120	UPLC-MS/MS	C14H20O8	5-(2-Hydroxyethyl)-2-O-glucosylphenol	Phenolic acids	Phenolic acids	-	74088.2	71213.8	69082.9	113954	95296.7	101510	1.05771	0.022005	1.44955	0.535604	insig
pmb0789	UPLC-MS/MS	C14H21NO8	Pyridoxine-5'-O-glucoside	Others	Vitamin	-	4.95431e+07	4.09315e+07	4.50395e+07	1.2073e+07	1.67325e+07	1.03275e+07	1.07363	0.000706075	0.288775	-1.79198	down
Lmbn013410	UPLC-MS/MS	C14H22O	2,4-Di-Tert-Butylphenol	Phenolic acids	Phenolic acids	96-76-4	122785	126419	119733	126305	101574	87419.2	0.67655	0.254366	0.854614	-0.226655	insig
MWSmce613	UPLC-MS/MS	C14H26N4O11P2	Citicoline	Nucleotides and derivatives	Nucleotides and derivatives	987-78-0	8351.77	52456.2	27330.3	188966	203655	172609	0.983075	0.000895463	6.41299	2.681	insig
MWSslk133	UPLC-MS/MS	C14H26O4	1,14-Tetradecanedioic Acid	Lipids	Free fatty acids	821-38-5	103982	103201	105607	115170	126445	127645	1.02231	0.0381886	1.18053	0.239439	insig
MWSslk183	UPLC-MS/MS	C15H10O4	7,8-Dihydroxy-4-phenylcoumarin	Lignans and Coumarins	Coumarins	842-01-3	19470.8	19302.9	4483.34	544455	411646	435512	1.06666	0.00747941	32.1708	5.00768	up
mws0744	UPLC-MS/MS	C15H12O8	Dihydromyricetin (Ampelopsin)	Flavonoids	Flavanonols	27200-12-0	12665.9	37686.8	67901.7	317370	278354	262671	1.00672	0.000413937	7.25888	2.85975	up
mws0042	UPLC-MS/MS	C15H14O7	Epigallocatechin	Flavonoids	Flavanols	970-74-1	260405	219554	252639	57910.4	72222.3	18054.3	0.989137	0.000914119	0.202276	-2.3056	insig
Lmhn001580	UPLC-MS/MS	C15H16O10	Sinapoyltartaric acid	Phenolic acids	Phenolic acids	-	3027.05	8782.11	5422.65	320414	354451	303030	1.09247	0.00199624	56.7494	5.82653	up
Lmbp003825	UPLC-MS/MS	C15H16O8	Skimmin (7-Hydroxycoumarin-7-O-glucoside)	Lignans and Coumarins	Coumarins	93-39-0	192191	210040	355886	164914	47029.2	53034.5	0.882869	0.06862	0.349521	-1.51655	insig
pma0149	UPLC-MS/MS	C15H16O9	Sinapoyl malate	Phenolic acids	Phenolic acids	92344-58-6	349514	36164.2	24052	79763.4	95689.5	102723	0.205314	0.720756	0.678924	-0.558678	insig
pmn001420	UPLC-MS/MS	C15H18O9	1-O-Caffeoyl-β-D-glucose*	Phenolic acids	Phenolic acids	14364-08-0	1.29433e+07	2.03053e+07	1.37934e+07	503690	497716	566132	1.10077	0.0227249	0.0333221	-4.90738	down
Zmhn001793	UPLC-MS/MS	C15H18O9	6-O-Caffeoyl-D-glucose*	Phenolic acids	Phenolic acids	-	1.33185e+07	2.04139e+07	1.55204e+07	245589	260441	384118	1.10026	0.0164666	0.0180731	-5.79002	down
Wafp002664	UPLC-MS/MS	C15H20N2O4	1-O-p-Coumaroyllysine	Alkaloids	Phenolamine	-	3.44334e+06	2.85071e+06	2.99944e+06	414088	365302	324127	1.10064	0.00361921	0.118741	-3.07411	down
Lmmn000774	UPLC-MS/MS	C15H20O9	Dihydrocaffeoylglucose	Phenolic acids	Phenolic acids	-	207369	345756	213795	65684.2	66500.3	54182.3	1.06989	0.0492453	0.243007	-2.04093	down
pmf0289	UPLC-MS/MS	C15H21N5O4	Riboprine	Nucleotides and derivatives	Nucleotides and derivatives	7724-76-7	4920.58	5715.03	19666.3	295653	215650	190291	1.06537	0.0177369	23.1534	4.53315	up
pmc0281	UPLC-MS/MS	C15H21N5O8	Ribosyladenosine	Nucleotides and derivatives	Nucleotides and derivatives	-	510047	625578	572643	907283	859005	937278	1.06413	0.00201628	1.58264	0.66233	insig
Smcp000882	UPLC-MS/MS	C15H21NO7	N-benzoyl-2-aminoethyl-β-D-glucopyranoside	Alkaloids	Alkaloids	-	120097	93542.5	135667	3.756e+07	3.47051e+07	2.71322e+07	1.10345	0.00876281	284.556	8.15257	up
mws1409	UPLC-MS/MS	C15H22N2O18P2	Uridine-5'-diphosphoglucuronic acid	Nucleotides and derivatives	Nucleotides and derivatives	-	74398.4	66340.5	67103.8	6198.76	2197.71	14818.2	1.00879	0.000343109	0.111694	-3.16238	down
MWS201458	UPLC-MS/MS	C15H22N2O3	Phe-Ile	Amino acids and derivatives	Amino acids and derivatives	22951-94-6	504170	801848	1.00231e+06	1.18626e+06	1.44224e+06	1.12812e+06	0.850057	0.0584417	1.62742	0.702587	insig
mws5035	UPLC-MS/MS	C15H22N2O3	L-Leucyl-L-phenylalanine	Amino acids and derivatives	Amino acids and derivatives	56217-82-4	447236	548806	613050	653755	703747	591481	0.756322	0.133331	1.21123	0.276474	insig
pmb0496	UPLC-MS/MS	C15H22N4O3	N-Feruloylagmatine	Alkaloids	Phenolamine	-	158738	42288.5	134014	104735	107318	31463.1	0.28434	0.523932	0.726828	-0.460314	insig
MWStz103	UPLC-MS/MS	C15H22N6O5S	S-(5'-Adenosyl)-L-methionine	Amino acids and derivatives	Amino acids and derivatives	29908-03-0	1.63774e+06	1.63681e+06	2.92547e+06	92180.6	386203	86399.7	1.02524	0.0424692	0.0910938	-3.4565	down
pmp001245	UPLC-MS/MS	C15H22NO4+	Feruloylcholine	Alkaloids	Phenolamine	85927-25-9	557941	696684	926398	306108	88410.1	169990	0.974175	0.0194745	0.258827	-1.94994	insig
mws1051	UPLC-MS/MS	C15H23N6O5S+	S-Adenosylmethionine	Amino acids and derivatives	Amino acids and derivatives	485-80-3	1.50612e+07	6.24079e+06	8.2127e+06	2466.28	9	8751.9	1.01124	0.0665722	0.000380393	-11.3602	down
pmb2922	UPLC-MS/MS	C15H24N2O17P2	Uridine 5'-diphospho-D-glucose	Nucleotides and derivatives	Nucleotides and derivatives	133-89-1	5.2712e+06	8.5453e+06	5.91734e+06	8642.1	7058.45	14024.3	1.10173	0.0224565	0.00150629	-9.37478	down
MWS2430	UPLC-MS/MS	C15H30O2	13-methylmyristic acid	Lipids	Free fatty acids	2485-71-4	459643	518139	405013	627976	668565	600789	0.994793	0.0168844	1.3721	0.456384	insig
mws0359	UPLC-MS/MS	C15H30O2	Pentadecanoic Acid	Lipids	Free fatty acids	1002-84-2	603483	393594	552766	674264	742636	691965	0.851913	0.0866916	1.3607	0.444344	insig
mws0988	UPLC-MS/MS	C16H12O7	Rhamnetin; 3,5,3',4'-Tetrahydroxy-7-Methoxyflavone	Flavonoids	Flavonols	90-19-7	1905.11	3026.82	3003.92	73309.3	29807	79666.4	1.07718	0.0651951	23.0326	4.5256	up
mws0748	UPLC-MS/MS	C16H18O9	1-Caffeoylquinic acid	Phenolic acids	Phenolic acids	1241-87-8	22201.2	24410.5	54545.7	112050	131892	31160.9	0.717303	0.192756	2.71956	1.44337	insig
mws1077	UPLC-MS/MS	C16H18O9	Scopoletin-7-O-glucoside (Scopolin)	Lignans and Coumarins	Coumarins	531-44-2	49165.3	75706	64350.1	85922.5	25581.3	30365.4	0.517944	0.511109	0.749753	-0.415513	insig
mws0178	UPLC-MS/MS	C16H18O9	Chlorogenic acid (3-O-Caffeoylquinic acid)	Phenolic acids	Phenolic acids	327-97-9	70171.6	55199.2	31687.5	103189	268067	75598.1	0.802612	0.246835	2.84515	1.50851	insig
pme1816	UPLC-MS/MS	C16H18O9	Neochlorogenic acid (5-O-Caffeoylquinic acid)	Phenolic acids	Phenolic acids	906-33-2	58500.3	40696.3	20231.9	69531	283427	99099.3	0.841515	0.237313	3.78517	1.92036	insig
mws2108	UPLC-MS/MS	C16H18O9	Cryptochlorogenic acid (4-O-Caffeoylquinic acid)	Phenolic acids	Phenolic acids	905-99-7	48983.2	53503.7	22640	65401.5	166176	55047.4	0.729423	0.26499	2.29068	1.19577	insig
Zmhn002422	UPLC-MS/MS	C16H20O9	1-O-Feruloyl-β-D-glucose	Phenolic acids	Phenolic acids	7196-71-6	689472	675962	710269	212496	207898	236577	1.10204	4.33228e-06	0.316505	-1.6597	down
Hmhn003518	UPLC-MS/MS	C16H20O9	4-O-β-D-glucopyranosylferulic acid	Phenolic acids	Phenolic acids	-	2.52844e+07	2.27876e+07	5.28374e+07	63934.6	41278.4	121774	1.09526	0.0733521	0.00224941	-8.79624	down
MWS201400	UPLC-MS/MS	C16H21N3O3	Val-Trp	Amino acids and derivatives	Amino acids and derivatives	24587-37-9	2.99628e+06	5.2187e+06	6.76467e+06	1.37113e+06	1.46655e+06	483993	0.966079	0.0613379	0.221746	-2.17302	insig
Hajp012062	UPLC-MS/MS	C16H22O4	Dibutyl phthalate	Organic acids	Organic acids	84-74-2	1.66484e+06	1.68047e+06	1.71809e+06	1.77705e+06	1.87042e+06	1.81427e+06	1.00127	0.0210401	1.07867	0.109255	insig
mws0906	UPLC-MS/MS	C16H22O8	Coniferin	Phenolic acids	Phenolic acids	531-29-3	1.30488e+07	1.80791e+07	1.31042e+07	561474	416555	554937	1.10068	0.0133965	0.0346574	-4.85069	down
pmb0964	UPLC-MS/MS	C16H23N5O5	Isopentenyladenine-7-N-glucoside	Nucleotides and derivatives	Nucleotides and derivatives	-	7.63916e+06	7.40037e+06	6.34003e+06	7.41842e+06	6.58498e+06	1.33487e+07	0.444268	0.449606	1.27936	0.35542	insig
pmp001214	UPLC-MS/MS	C16H24NO5+	Sinapine	Alkaloids	Phenolamine	18696-26-9	95605.3	68055.6	63079.7	220950	149414	88338.6	0.822673	0.174613	2.02303	1.01652	insig
pmb0502	UPLC-MS/MS	C16H25N3O2	p-Coumaroylspermidine	Alkaloids	Phenolamine	-	6792.6	9125.72	10868.6	360163	435813	238224	1.09666	0.0281016	38.6084	5.27084	up
pmb0464	UPLC-MS/MS	C16H27NO14	L-Aspartic acid-O-diglucoside	Amino acids and derivatives	Amino acids and derivatives	-	8.37015e+06	6.87288e+06	1.02719e+07	5.98024e+06	6.33385e+06	3.61909e+06	0.831564	0.071395	0.624466	-0.679306	insig
MWSslk132	UPLC-MS/MS	C16H30O4	Hexadecanedioic acid	Lipids	Free fatty acids	505-54-4	129661	136399	137163	189196	195477	182754	1.09197	0.000555615	1.40723	0.492856	insig
pme2827	UPLC-MS/MS	C16H32O	Palmitaldehyde	Lipids	Free fatty acids	629-80-1	3.0402e+07	3.02695e+07	2.5881e+07	7.34574e+07	7.62459e+07	8.09224e+07	1.09657	0.000128385	2.66458	1.41391	up
mws1488	UPLC-MS/MS	C16H32O2	Palmitic acid	Lipids	Free fatty acids	1957-10-03	88365.8	87053.4	81833.4	212113	226340	176236	1.08752	0.0140477	2.38943	1.25667	up
Lmmn003323	UPLC-MS/MS	C16H32O3	2-Hydroxyhexadecanoic acid	Organic acids	Organic acids	764-67-0	458386	581287	634869	4.0181e+06	3.35174e+06	3.04576e+06	1.09464	0.00794747	6.21997	2.63691	up
Lmyn007883	UPLC-MS/MS	C16H32O4	9,16-Dihydroxypalmitic acid	Lipids	Free fatty acids	38076-49-2	14213.7	21986.6	17653.2	322134	333337	253911	1.09866	0.00711929	16.8862	4.07777	up
Hamp011640	UPLC-MS/MS	C16H33NO	palmitic amide	Others	Others	-	183708	494920	277029	404713	314851	291136	0.230294	0.866005	1.0576	0.0807893	insig
pmp001264	UPLC-MS/MS	C16H35NO2	Hexadecylsphingosine	Lipids	Sphingolipids	-	1.39174e+07	1.56145e+07	1.24989e+07	9.61383e+06	1.04213e+07	9.68293e+06	1.02449	0.036504	0.707054	-0.500109	insig
mad1424	UPLC-MS/MS	C17H14O13	Ditartaroyl-hydroxycoumarin	Lignans and Coumarins	Coumarins	-	876932	816427	846998	250290	277701	381214	1.07368	0.00170042	0.357905	-1.48235	down
Lmcp005645	UPLC-MS/MS	C17H14O7	Quercetin-3,4'-Dimethyl Ether	Flavonoids	Flavonols	33429-83-3	6604.27	9401.7	9977.13	644089	634432	365998	1.0985	0.0273523	63.2919	5.98395	up
Xmdn001002	UPLC-MS/MS	C17H16O2	Trans-hinokiresinol	Lignans and Coumarins	Lignans	17676-24-3	84260	95289.7	109447	17373.7	14426.4	3818	1.01574	0.00165991	0.123247	-3.02037	down
Wagp007639	UPLC-MS/MS	C17H17NO2	N-(4-hydroxyphenethyl)cinnamamide	Alkaloids	Alkaloids	-	63518.1	131136	50956.9	117264	194027	84595.7	0.618178	0.291885	1.61184	0.68871	insig
Zbsp007466	UPLC-MS/MS	C17H17NO2	N-trans-cinnamoylphydroxyphenylethylamine	Alkaloids	Phenolamine	-	78002.8	114542	41829.1	144093	216530	87686.1	0.713857	0.189808	1.9128	0.935684	insig
Zahp006974	UPLC-MS/MS	C17H17NO2	Cinnamoyltyramine	Alkaloids	Phenolamine	20384-14-9	65621.3	112426	50772.7	115813	233403	95387.9	0.737786	0.231274	1.94303	0.958309	insig
Hmjp005556	UPLC-MS/MS	C17H17NO3	(2E)-3-(4-Hydroxyphenyl)-N-[2-(4-hydroxyphenyl)ethyl]-2-propenamide	Alkaloids	Alkaloids	-	1.29163e+07	7.11631e+06	1.786e+07	5.29351e+06	1.60506e+07	1.36689e+07	0.146583	0.841663	0.924008	-0.114023	insig
pmp001252	UPLC-MS/MS	C17H17NO3	p-Coumaroyltyramine	Alkaloids	Phenolamine	36417-86-4	1.11476e+07	6.23752e+06	1.53125e+07	5.48976e+06	1.62923e+07	1.27647e+07	0.0280562	0.888624	1.05655	0.0793655	insig
Hmdp001950	UPLC-MS/MS	C17H18O5	2',7-Dihydroxy-3',4'-dimethoxyisoflavan	Flavonoids	Other Flavonoids	52250-35-8	83710.8	117557	126242	1.13839e+07	8.47764e+06	9.6891e+06	1.10236	0.00739222	90.2281	6.4955	up
mws0232	UPLC-MS/MS	C17H20N4O6	Riboflavin (Vitamin B2)	Others	Vitamin	83-88-5	372241	989221	800744	3.63367e+06	4.56162e+06	3.27562e+06	1.03962	0.00617784	5.30519	2.4074	up
Lmhn002573	UPLC-MS/MS	C17H20O11	Sinapoylglucuronic acid	Phenolic acids	Phenolic acids	-	228294	124481	167760	61271	50495.6	34693.6	1.031	0.0461889	0.281365	-1.82949	down
MWS5083	UPLC-MS/MS	C17H21N4O9P	Flavin Single Nucleotide(FMN)	Nucleotides and derivatives	Nucleotides and derivatives	6184-17-4	199923	236287	255912	41106.7	34348.1	26600.1	1.09199	0.00462138	0.147452	-2.76168	down
HJN003	UPLC-MS/MS	C17H22O10	1-O-Sinapoyl-β-D-glucose	Phenolic acids	Phenolic acids	-	369326	601382	548223	207257	163167	274371	0.991244	0.036493	0.424506	-1.23614	insig
Zmhn002227	UPLC-MS/MS	C17H22O10	4-O-Glucosyl-sinapate	Phenolic acids	Phenolic acids	-	46806.9	68818.2	61959.4	253455	212013	251611	1.08666	0.00151684	4.03796	2.01363	up
Lmbp002309	UPLC-MS/MS	C17H22O9	Sinapaldehyde-4-O-Glucoside	Phenolic acids	Phenolic acids	154461-65-1	19948.2	30515.8	22398.1	98547.5	146702	106479	1.07816	0.0208675	4.82732	2.27122	up
MWS20672	UPLC-MS/MS	C17H23N3O6	Glu-Phe-Ala	Amino acids and derivatives	Amino acids and derivatives	-	95414.5	117096	188004	391432	322202	227310	0.953159	0.0421469	2.34934	1.23225	insig
mws1496	UPLC-MS/MS	C17H23NO3	Hyoscyamine	Alkaloids	Tropan alkaloids	101-31-5	5069.53	25625.1	4384.37	515891	514742	465323	1.06491	0.000244164	42.6454	5.41432	up
Zasn010461	UPLC-MS/MS	C17H34O2	Pentadecanoic acid,14-methyl-,methyl ester	Others	Others	5129-60-2	149961	131949	121570	539173	420999	485774	1.09323	0.0068938	3.58369	1.84145	up
mws0362	UPLC-MS/MS	C17H34O2	Heptadecanoic acid	Lipids	Free fatty acids	506-12-7	9	9	9	837083	791235	754413	1.10484	0.000905203	88249.3	16.4293	up
Zmyn005252	UPLC-MS/MS	C17H34O3	3-Hydroxy-palmitic acid methyl ester	Lipids	Free fatty acids	51883-36-4	44016.8	43380.1	36035	54210.3	59308.5	55804.3	1.01283	0.0117648	1.37179	0.456064	insig
MWSmce549	UPLC-MS/MS	C17H34O4	1-Monomyristin	Lipids	Free fatty acids	589-68-4	458401	396107	369666	228280	228202	273377	1.04707	0.0104588	0.596206	-0.746118	insig
Wafp004987	UPLC-MS/MS	C18H17NO4	N-Feruloylphenylacetamide	Alkaloids	Phenolamine	-	2.59973e+06	2.86211e+06	818208	297713	2.88442e+06	1.53241e+06	0.342642	0.6249	0.750718	-0.413656	insig
mws1433	UPLC-MS/MS	C18H19NO4	N-Feruloyltyramine	Alkaloids	Phenolamine	66648-43-9	4.95319e+07	4.61721e+07	3.10982e+07	9.51667e+06	4.62949e+07	3.29272e+07	0.517836	0.372394	0.69982	-0.514943	insig
MWS1927	UPLC-MS/MS	C18H19NO4	N-benzoyl-L-tyrosine ethyl ester	Amino acids and derivatives	Amino acids and derivatives	3483-82-7	698.542	1370.08	4137.71	53002.7	22180.4	10451.2	0.980337	0.171384	13.7979	3.78638	insig
Zblp005777	UPLC-MS/MS	C18H19NO4	N-trans-ferulicacidacylp-hydroxyphenylethylamine	Alkaloids	Phenolamine	-	4.15253e+07	3.89207e+07	2.48906e+07	8.15271e+06	4.07742e+07	3.01506e+07	0.452131	0.479759	0.750713	-0.413666	insig
Zblp005760	UPLC-MS/MS	C18H21NO4	dihydro-N-feruloyltyramine	Alkaloids	Phenolamine	-	252210	266672	185145	42351	259671	185320	0.520355	0.379723	0.692221	-0.530694	insig
pme2074	UPLC-MS/MS	C18H29NO4	Jasmonoyl-L-Isoleucine	Amino acids and derivatives	Amino acids and derivatives	120330-93-0	9	9	9	21833.4	20503.3	22804.2	1.1048	0.000942826	2412.63	11.2364	up
mws0367	UPLC-MS/MS	C18H30O2	α-Linolenic Acid*	Lipids	Free fatty acids	463-40-1	1.16174e+06	1.15998e+06	1.23724e+06	6.61533e+07	6.94177e+07	6.20985e+07	1.10466	0.00106719	55.5413	5.79549	up
mws0366	UPLC-MS/MS	C18H30O2	γ-Linolenic Acid*	Lipids	Free fatty acids	506-26-3	1.56674e+06	1.84431e+06	1.59106e+06	5.7887e+07	6.22254e+07	5.50975e+07	1.10418	0.00131005	35.0272	5.1304	up
pmb1650	UPLC-MS/MS	C18H30O2	Octadeca-11E,13E,15Z-trienoic acid	Lipids	Free fatty acids	25575-00-2	2.38481e+06	2.00567e+06	2.1337e+06	1.96415e+06	2.31993e+06	1.93313e+06	0.334269	0.57296	0.95295	-0.0695269	insig
pmb0889	UPLC-MS/MS	C18H30O2	Punicic acid (9Z,11E,13Z-octadecatrienoic acid)	Lipids	Free fatty acids	544-72-9	749561	1.05868e+06	773294	5.77001e+06	4.74403e+06	6.00649e+06	1.09388	0.00461069	6.39951	2.67796	up
Zmyn004676	UPLC-MS/MS	C18H30O3	17-Hydroxylinolenic acid	Lipids	Free fatty acids	-	150281	179069	160891	920892	844734	1.24845e+06	1.0934	0.0205893	6.14816	2.62016	up
Zmyn004732	UPLC-MS/MS	C18H30O3	2R-hydroxy-9Z,12Z,15Z-octadecatrienoic acid	Lipids	Free fatty acids	-	45093.1	165022	35118.6	675147	564103	882092	1.01987	0.0109684	8.65029	3.11275	up
Zmzn003953	UPLC-MS/MS	C18H30O4	13(s)-hydroperoxy-(9z,11e,15z)-octadecatrienoic acid	Lipids	Free fatty acids	67597-26-6	9.98607e+06	1.20369e+07	9.08156e+06	1.04761e+07	1.13357e+07	1.06586e+07	0.304267	0.660574	1.04392	0.0620053	insig
Zmyn004449	UPLC-MS/MS	C18H30O4	9-Hydroxy-12-oxo-10(E),15(Z)-octadecadienoic acid	Lipids	Free fatty acids	-	23660.8	25897.4	24226.2	158092	127332	157747	1.10083	0.00660227	6.00629	2.58647	up
pmb2791	UPLC-MS/MS	C18H30O4	9-Hydroperoxy-10E,12,15Z-octadecatrienoic acid	Lipids	Free fatty acids	111004-08-1	41711.1	86467.4	36524.2	37958	32218.6	35265.5	0.623293	0.338673	0.640196	-0.643413	insig
Lmmn000214	UPLC-MS/MS	C18H32O15	Solatriose	Others	Saccharides	528-40-5	1.09308e+06	553848	764396	114983	212233	53664.3	1.00554	0.0406645	0.157955	-2.66241	down
mws1589	UPLC-MS/MS	C18H32O16	D-Panose	Others	Saccharides	33401-87-5	5.89543e+06	3.84575e+06	4.4448e+06	4.37839e+06	4.0193e+06	2.37539e+06	0.594157	0.259378	0.759418	-0.397035	insig
pme0500	UPLC-MS/MS	C18H32O16	D-Melezitose	Others	Saccharides	597-12-6	6.07612e+06	4.60416e+06	5.97905e+06	1.15196e+06	1.48683e+06	917241	1.0803	0.00648702	0.213456	-2.22799	down
MWSmce486	UPLC-MS/MS	C18H32O16	Manninotriose	Others	Saccharides	13382-86-0	34892.1	25906.1	16626.8	322470	288170	171611	1.07255	0.0342674	10.1033	3.33676	up
MWS0442	UPLC-MS/MS	C18H32O16	Maltotriose	Others	Saccharides	1109-28-0	2.53429e+08	3.59961e+08	2.51727e+08	1.95604e+07	2.25221e+07	1.57029e+07	1.0972	0.0170001	0.066795	-3.90412	down
pme2125	UPLC-MS/MS	C18H32O16	Raffinose	Others	Saccharides	512-69-6	2.05717e+07	1.68459e+07	1.27318e+07	5.55869e+06	6.93665e+06	3.83418e+06	1.02785	0.0255493	0.325617	-1.61875	down
Hmqp000191	UPLC-MS/MS	C18H32O16	Planteose	Others	Saccharides	470-57-5	171091	166022	144457	101758	59219.5	103272	0.945023	0.0199245	0.548724	-0.865848	insig
Lmbn006152	UPLC-MS/MS	C18H32O2	(9Z,11E)-Octadecadienoic acid	Lipids	Free fatty acids	2540-56-9	32901	43156.3	49062.4	643608	805917	663914	1.09961	0.00555665	16.8913	4.07821	up
Lmbn005369	UPLC-MS/MS	C18H32O3	13(S)-HODE;13(S)-Hydroxyoctadeca-9Z,11E-dienoic acid*	Lipids	Free fatty acids	10219-69-9	234181	376659	323145	2.2554e+06	2.48391e+06	2.94284e+06	1.09215	0.00621418	8.22512	3.04004	up
Hmqp005455	UPLC-MS/MS	C18H32O3	15(R)-Hydroxylinoleic Acid	Lipids	Free fatty acids	177931-23-6	67336.1	78873.7	74226.9	123659	128814	147606	1.0744	0.00617437	1.81494	0.859919	insig
Lmbn005662	UPLC-MS/MS	C18H32O3	9(10)-EpOME;(9R,10S)-(12Z)-9,10-Epoxyoctadecenoic acid	Lipids	Free fatty acids	16833-56-0	28158.6	38767.9	46751.6	33874.2	23113.3	33839.2	0.539946	0.313102	0.798982	-0.323765	insig
Rfmb091	UPLC-MS/MS	C18H32O3	9S-Hydroxy-10E,12Z-octadecadienoic acid*	Lipids	Free fatty acids	15514-85-9	226121	339538	309864	2.12024e+06	2.25111e+06	2.72245e+06	1.09428	0.00625237	8.10236	3.01834	up
Wafn011571	UPLC-MS/MS	C18H32O3	alpha-Hydroxylinoleic acid	Lipids	Free fatty acids	57818-44-7	225500	401238	331245	2.0572e+06	2.50176e+06	2.88795e+06	1.08518	0.00959974	7.77353	2.95857	up
MWS80007	UPLC-MS/MS	C18H32O4	13-Hydroperoxy-9Z,11E-octadecadienoic acid	Lipids	Free fatty acids	23017-93-8	45877.1	73297.6	49167.6	246090	314098	352557	1.0804	0.0108671	5.42196	2.43881	up
pmb2804	UPLC-MS/MS	C18H32O4	13S-Hydroperoxy-9Z,11E-octadecadienoic acid	Lipids	Free fatty acids	33964-75-9	74229.1	102430	59727.1	56223.4	41070.1	48718.9	0.870961	0.126475	0.617686	-0.695054	insig
Lmbn005287	UPLC-MS/MS	C18H32O4	7S,8S-DiHODE; (9Z,12Z)-(7S,8S)-Dihydroxyoctadeca-9,12-dienoic acid	Lipids	Free fatty acids	143288-65-7	45877.1	73297.6	49167.6	246090	314098	352557	1.0804	0.0108671	5.42196	2.43881	up
Zmjn004133	UPLC-MS/MS	C18H32O4	9S-Hydroperoxy-10E,12Z-octadecadienoic acid	Lipids	Free fatty acids	5502-91-0	28190.4	72557.8	27836.5	49510.9	98915.8	65223.1	0.670809	0.244624	1.66155	0.73253	insig
MWS80006	UPLC-MS/MS	C18H32O4	9-Hydroperoxy-9Z,11E-Octadecadienoic Acid	Lipids	Free fatty acids	-	63434.6	88019.3	59118.9	169421	203230	219015	1.06436	0.00356845	2.80979	1.49046	up
Rfmb087	UPLC-MS/MS	C18H32O4	9-Hydroxy-13-oxo-10-octadecenoic Acid	Lipids	Free fatty acids	-	39757	45876	36446.8	250408	168927	244777	1.08908	0.0195617	5.43998	2.4436	up
Zadn009075	UPLC-MS/MS	C18H32O4	Hydroperoxylinoleic acid	Lipids	Free fatty acids	34444-18-3	13306.3	14957.6	12421.7	412305	431787	407645	1.10425	0.000296026	30.7661	4.94327	up
pmn001691	UPLC-MS/MS	C18H32O5	9,12,13-Trihydroxy-10,15-octadecadienoic acid	Lipids	Free fatty acids	-	12524.7	21668.3	13884.6	495974	316810	433777	1.09557	0.0166198	25.9281	4.69644	up
Zahp012577	UPLC-MS/MS	C18H33NO	octadecadienoic acid amide	Alkaloids	Alkaloids	-	73300.1	68568.5	86401.9	208870	202210	163042	1.07826	0.00829743	2.5151	1.33061	up
mws2623	UPLC-MS/MS	C18H34O2	11-Octadecanoic acid(Vaccenic acid)	Lipids	Free fatty acids	506-17-2	2.40202e+06	2.56505e+06	2.60636e+06	4.30469e+07	4.91832e+07	3.86579e+07	1.1034	0.00545324	17.2825	4.11124	up
mws0396	UPLC-MS/MS	C18H34O2	Elaidic Acid	Lipids	Free fatty acids	112-79-8	3.54149e+06	3.60634e+06	3.80747e+06	5.81678e+07	6.1855e+07	4.78693e+07	1.10305	0.00632411	15.3252	3.93783	up
Lmyn012331	UPLC-MS/MS	C18H34O2	Petroselinic acid	Lipids	Free fatty acids	593-39-5	2.20512e+06	2.04144e+06	2.71118e+06	4.38271e+07	4.95299e+07	3.81829e+07	1.10163	0.00601257	18.9056	4.24074	up
Zmyn004714	UPLC-MS/MS	C18H34O3	Ricinoleic acid	Lipids	Free fatty acids	141-22-0	180863	172962	186859	247289	223875	230044	1.06261	0.0057769	1.29689	0.37506	insig
Lmbn005487	UPLC-MS/MS	C18H34O4	12,13-DHOME; (9Z)-12,13-Dihydroxyoctadec-9-enoic acid	Lipids	Free fatty acids	263399-35-5	48546.4	55874.2	43688.9	71993.9	60512.2	64523.3	0.945132	0.0289985	1.33029	0.411745	insig
Lmbn007891	UPLC-MS/MS	C18H34O4	Hydroxy ricinoleic acid	Lipids	Free fatty acids	-	29349.7	54132.7	42403.7	2.64541e+06	2.5626e+06	2.69024e+06	1.10079	0.000128424	62.7413	5.97134	up
Lmbn003970	UPLC-MS/MS	C18H34O5	9,12,13-TriHOME; 9(S),12(S),13(S)-Trihydroxy-10(E)-octadecenoic acid	Lipids	Free fatty acids	97134-11-7	197058	301613	189215	1.01445e+07	5.68889e+06	9.72151e+06	1.09537	0.0280475	37.1499	5.21529	up
Hmqn003054	UPLC-MS/MS	C18H34O5	9,10,11-Trihydroxy-12-octadecenoic acid	Lipids	Free fatty acids	61911-67-9	42305.5	56015.6	45003.3	940438	676671	1.1435e+06	1.09699	0.0230742	19.2612	4.26763	up
pmn001694	UPLC-MS/MS	C18H34O5	9,10,13-Trihydroxy-11-Octadecenoic Acid	Lipids	Free fatty acids	29907-57-1	425624	586285	438899	1.28552e+07	8.09145e+06	1.45264e+07	1.09569	0.0276278	24.4505	4.61179	up
Lmbn004240	UPLC-MS/MS	C18H34O5	9,10-Dihydroxy-12,13-epoxyoctadecanoic acid	Lipids	Free fatty acids	-	14940.7	15150.4	10098.7	142940	150045	214670	1.09306	0.020325	12.6315	3.65895	up
YC512118	UPLC-MS/MS	C18H35NO	Oleamide (9-Octadecenamide)	Lipids	Free fatty acids	301-02-0	32016	33121.3	35727.1	59706.5	51466.9	44378.8	1.01654	0.0471697	1.54219	0.624982	insig
Zmyn005026	UPLC-MS/MS	C18H36O2	16-Methylheptadecanoic acid	Lipids	Free fatty acids	2724-58-5	2.42826e+06	2.48676e+06	2.57907e+06	2.92373e+06	2.52573e+06	3.19637e+06	0.771769	0.1825	1.15369	0.206254	insig
mws1489	UPLC-MS/MS	C18H36O2	Stearic Acid	Lipids	Free fatty acids	57-11-4	3.61942e+07	4.34382e+07	3.99258e+07	4.50017e+07	3.54367e+07	3.63416e+07	0.155305	0.816072	0.976764	-0.0339185	insig
MWS5235	UPLC-MS/MS	C18H36O3	12-Hydroxyoctadecanoic acid	Lipids	Free fatty acids	106-14-9	25613.7	31811	23103.9	37267.2	38229.1	36428.9	0.962778	0.051091	1.38988	0.474962	insig
Zmyn005384	UPLC-MS/MS	C18H36O3	2R-Hydroxyoctadecanoic Acid	Lipids	Free fatty acids	26633-48-7	72040	70354.1	63232.4	101572	102467	84275.4	1.0091	0.0276477	1.40213	0.48762	insig
Lmqn008288	UPLC-MS/MS	C18H36O3	3-Hydroxyoctadecanoic Acid	Lipids	Free fatty acids	45261-96-9	8.97478e+06	9.89203e+06	9.48289e+06	1.03118e+07	1.01939e+07	1.05587e+07	0.92519	0.0604931	1.09576	0.131929	insig
MWS4295	UPLC-MS/MS	C18H36O3	DL-2-hydroxystearic acid	Lipids	Free fatty acids	629-22-1	76790.5	72566.2	65635.6	104732	108524	89572.1	1.01303	0.0195693	1.40856	0.494216	insig
Lmyn007622	UPLC-MS/MS	C18H36O5	9,10,18-Trihydroxystearic acid	Lipids	Free fatty acids	496-86-6	5251.01	10011.3	13070.3	133907	151546	93949.1	1.07642	0.0190674	13.391	3.74319	up
Hamp012107	UPLC-MS/MS	C18H37NO	Stearamide	Alkaloids	Alkaloids	124-26-5	63833.8	188381	76371.1	89525.6	84068.8	69737.3	0.288933	0.548619	0.740542	-0.433346	insig
ML10195036	UPLC-MS/MS	C18H37NO2	3-Dehydrosphinganine	Lipids	Sphingolipids	16105-69-4	42648.9	36133.2	65157.6	22617.9	25221.3	20343.6	0.981188	0.0993257	0.47369	-1.07798	insig
MA10012327	UPLC-MS/MS	C18H37NO2	D-Sphingosine	Lipids	Sphingolipids	123-78-4	904.559	1173.95	1504.16	54555.2	59991.5	67434	1.10111	0.00385445	50.7946	5.6666	up
pmf0293	UPLC-MS/MS	C18H38O	1-Octadecanol	Lipids	Free fatty acids	112-92-5	2.5767e+06	2.66041e+06	2.67527e+06	2.71205e+06	2.68725e+06	2.68784e+06	0.743491	0.19209	1.02209	0.0315168	insig
pmb2221	UPLC-MS/MS	C18H39NO3	4-Hydroxysphinganine	Lipids	Sphingolipids	554-62-1	3.0623e+06	2.93143e+06	4.13602e+06	1.66857e+06	1.4781e+06	1.34329e+06	1.05478	0.0326011	0.443244	-1.17383	down
pmb0235	UPLC-MS/MS	C19H14O5	O-Feruloyl coumarin	Lignans and Coumarins	Coumarins	-	300419	252523	279199	82599	134564	167037	0.978515	0.0116015	0.4617	-1.11497	insig
pmb1207	UPLC-MS/MS	C19H14O6	O-Feruloyl 3-hydroxycoumarin	Lignans and Coumarins	Coumarins	-	1.96385e+06	1.95064e+06	3.2305e+06	494115	615042	337302	1.05701	0.0422928	0.202444	-2.30441	down
Wbtp007427	UPLC-MS/MS	C19H16O6	7,10-dihydroxy-12-methoxy-2,2-dimethyl-1,11-dioxatetracen-6-one	Others	Ketone compounds	-	4.85343e+06	5.14697e+06	4.37353e+06	3.78292e+06	3.67354e+06	3.79365e+06	1.02522	0.0404471	0.782675	-0.353515	insig
zjbp110819	UPLC-MS/MS	C19H18O4	6,7-dimethoxy-2-[2-phenylethyl]chromone	Others	Others	-	594471	993049	725574	174626	61972.5	87431.6	1.0476	0.0227411	0.140085	-2.83562	down
mws0430	UPLC-MS/MS	C19H19N7O6	Folic acid	Others	Vitamin	59-30-3	190857	202182	226867	23559.2	12140.4	10292.8	1.08409	0.00102251	0.0741925	-3.75258	down
Zmgp004297	UPLC-MS/MS	C19H20O2	1-phenyl-7-(4-hydroxyphenyl)-4-ene-3-heptanone	Others	Ketone compounds	-	1.04822e+06	1.20301e+06	1.21885e+06	1.1767e+06	851742	1.17347e+06	0.391677	0.513511	0.922723	-0.116031	insig
HJAP050	UPLC-MS/MS	C19H21NO5	N-Feruloyl-3-methoxytyramine	Alkaloids	Phenolamine	78510-19-7	1.21959e+07	1.40578e+07	3.16355e+06	4.19684e+06	3.22046e+07	1.31389e+07	0.277793	0.51321	1.68406	0.751943	insig
Hmjp005906	UPLC-MS/MS	C19H21NO5	N-Trans-Feruloyl-3'-O-methyldopamine	Alkaloids	Phenolamine	-	1.23837e+07	1.32345e+07	3.3138e+06	4.35753e+06	3.21843e+07	1.30356e+07	0.292643	0.500044	1.71359	0.777021	insig
Zahp005843	UPLC-MS/MS	C19H21NO5	N-Trans-Sinapoyltyramine	Alkaloids	Alkaloids	200125-11-7	510148	829668	94183.3	51750.6	65408.7	144716	0.784001	0.206129	0.182619	-2.45309	insig
pmb2654	UPLC-MS/MS	C19H27NO12	Anthranilate-1-O-Sophoroside	Phenolic acids	Phenolic acids	-	4.25759e+06	4.58646e+06	3.79561e+06	240857	328408	132322	1.08615	0.00208274	0.0555068	-4.17119	down
pma0633	UPLC-MS/MS	C19H32N4O2	N-p-Coumaroylspermine	Alkaloids	Phenolamine	130210-35-4	65021.1	118546	65054.8	746747	1.06738e+06	716813	1.08305	0.0189861	10.1799	3.34765	up
MWSmce689	UPLC-MS/MS	C19H32O2	Methyl linolenate	Lipids	Free fatty acids	301-00-8	23126.2	37867.2	24833.2	266051	256659	405231	1.08735	0.0271144	10.8118	3.43454	up
Lmcn009539	UPLC-MS/MS	C19H34O2	E,E,Z-1,3,12-Nonadecatriene-5,14-diol	Lipids	Free fatty acids	-	7.6222e+06	7.63131e+06	6.59832e+06	6.91163e+06	7.56091e+06	6.37647e+06	0.355826	0.528225	0.954108	-0.0677751	insig
pmp001284	UPLC-MS/MS	C19H38O4	Monopalmitin	Lipids	Glycerol ester	542-44-9	486648	473194	423311	417494	357135	401270	0.871076	0.0591903	0.850159	-0.234196	insig
pmb0864	UPLC-MS/MS	C19H40NO7P	LysoPE 14:0	Lipids	LPE	-	7863.47	9298.63	10954.5	461661	606650	380479	1.10098	0.0189444	51.5279	5.68728	up
Lmhp008337	UPLC-MS/MS	C19H40NO7P	LysoPE 14:0(2n isomer)	Lipids	LPE	-	12530.2	5365.77	11784.1	583121	715733	415934	1.0921	0.0229603	57.7759	5.85239	up
pmn001526	UPLC-MS/MS	C20H20O14	1,6-Di-O-galloyl-β-D-glucose	Phenolic acids	Phenolic acids	-	8885.39	4235.93	7548.08	2.29066e+06	1.72001e+06	1.54592e+06	1.10052	0.0145306	268.832	8.07056	up
Xmgp006913	UPLC-MS/MS	C20H20O5	2,4,2',4'-tetrahydroxy-3'-prenylchalcone	Flavonoids	Chalcones	-	103690	129197	75934	251407	204600	243713	1.0265	0.00355306	2.26578	1.18001	up
zjbp110804	UPLC-MS/MS	C20H20O6	6,7-dimethoxy-2-[2-(4'-hydroxy-3'-methoxyphenyl)ethyl]chromone	Others	Others	-	627128	912309	507888	5931.94	5374.29	6421.09	1.10168	0.0300395	0.00865878	-6.85162	down
Hmgn002833	UPLC-MS/MS	C20H20O7	4-Ketopinoresinol	Lignans and Coumarins	Lignans	-	23479.4	49630.8	25378.7	73777.8	105653	140806	0.986509	0.0456737	3.2515	1.70111	insig
Qmzp101807	UPLC-MS/MS	C20H22O5	Avicennol	Lignans and Coumarins	Coumarins	56110-68-0	704018	712881	782839	787613	766932	851687	0.770992	0.1259	1.09387	0.129444	insig
Lmdn004267	UPLC-MS/MS	C20H22O6	Epipinoresinol	Lignans and Coumarins	Lignans	24404-50-0	958343	1.80089e+06	1.13574e+06	1.57436e+06	1.38256e+06	1.53885e+06	0.464774	0.519442	1.15425	0.206953	insig
mws0393	UPLC-MS/MS	C20H24O2N2	Quinine	Alkaloids	Quinoline alkaloids	130-95-0	6499.2	9149.82	28475.3	182666	214991	99977.8	1.02953	0.0429301	11.278	3.49544	up
Lmmn003748	UPLC-MS/MS	C20H24O6	Isolariciresinol	Lignans and Coumarins	Lignans	548-29-8	4547.8	8482.8	2352.86	163945	93342.4	169560	1.07339	0.0299495	27.7472	4.79427	up
pmb0790	UPLC-MS/MS	C20H31NO13	Pyridoxine-5'-O-diglucoside	Others	Vitamin	-	541096	1.05977e+06	721386	437055	867632	408713	0.51649	0.393664	0.737818	-0.438664	insig
mws4134	UPLC-MS/MS	C20H32N6O12S2	Oxiglutatione	Amino acids and derivatives	Amino acids and derivatives	27025-41-8	389210	299014	231395	4734.83	6957.51	4996.42	1.09976	0.0222774	0.0181475	-5.78409	down
Zmpn003698	UPLC-MS/MS	C20H34O2	11,14,17-Eicosatrienoic acid	Lipids	Free fatty acids	17046-59-2	2.47016e+06	2.57618e+06	2.39412e+06	1.71216e+06	1.76433e+06	1.79053e+06	1.09365	0.00168561	0.707889	-0.498406	insig
mws0944	UPLC-MS/MS	C20H34O2	5(Z),8(Z),11(Z)-Eicosatrienoic acid	Lipids	Free fatty acids	20590-32-3	1.85892e+06	1.7889e+06	897701	880766	744911	1.31288e+06	0.64254	0.223651	0.646472	-0.629339	insig
Zasn010433	UPLC-MS/MS	C20H36O2	9,12-Octadecadienoic acid,ethyl ester	Others	Others	6114-21-2	32280.5	38171.6	30406.5	441423	528254	433891	1.10213	0.00462732	13.9162	3.79869	up
pmn001610	UPLC-MS/MS	C20H36O2	Eicosadienoic acid	Lipids	Free fatty acids	5598-38-9	77367.9	83820.2	87519.4	1.14787e+06	1.30876e+06	1.0726e+06	1.10338	0.00397847	14.1903	3.82684	up
Hmqp006023	UPLC-MS/MS	C20H36O3	Ethyl 9-Hydroxy-10,12-octadecadienoic acid	Lipids	Free fatty acids	-	2693.86	3391.47	2696.62	20493.3	21136.7	23086	1.10082	0.000807208	7.36922	2.88151	up
pmn001606	UPLC-MS/MS	C20H38O2	Eicosenoic acid	Lipids	Free fatty acids	26764-41-0	1.09665e+07	7.54015e+06	7.91591e+06	1.11843e+07	9.75101e+06	9.92661e+06	0.615898	0.306684	1.16801	0.224058	insig
mws0983	UPLC-MS/MS	C20H39NO2	N-Oleoylethanolamine	Alkaloids	Alkaloids	111-58-0	6566.37	10658.7	7622.12	69457.8	76583.5	57352.9	1.09157	0.00668525	8.18582	3.03313	up
Lmhp008440	UPLC-MS/MS	C20H40NO7P	LysoPE 15:1	Lipids	LPE	-	17198.7	10229.2	7227.84	623369	740738	446370	1.09343	0.0201545	52.2417	5.70713	up
Lmhp008273	UPLC-MS/MS	C20H40NO7P	LysoPE 15:1(2n isomer)	Lipids	LPE	-	6881.21	10890	2472.91	485311	414301	290229	1.07944	0.0205587	58.7746	5.87712	up
pmf0397	UPLC-MS/MS	C20H40O2	Arachidic acid	Lipids	Free fatty acids	506-30-9	2.2098e+07	2.21515e+07	2.21826e+07	2.30731e+07	2.21609e+07	2.22439e+07	0.56982	0.353738	1.01574	0.0225364	insig
pmb0862	UPLC-MS/MS	C20H42NO7P	LysoPC 12:0	Lipids	LPC	20559-18-6	3284.9	4703.83	8500.99	56660.7	51959.1	27825.1	1.04891	0.0428593	8.27455	3.04868	up
Lmhp009187	UPLC-MS/MS	C20H42NO7P	LysoPE 15:0	Lipids	LPE	-	39062.5	16340.8	29438.8	2.46359e+06	3.08683e+06	1.93874e+06	1.09599	0.0175687	88.2718	6.46388	up
Lmhp008885	UPLC-MS/MS	C20H42NO7P	LysoPE 15:0(2n isomer)	Lipids	LPE	-	30945.7	27820.3	35860.5	2.76493e+06	3.28992e+06	1.99232e+06	1.10192	0.0196143	85.0413	6.41009	up
pmf0297	UPLC-MS/MS	C20H42O	1-Eicosanol	Lipids	Free fatty acids	629-96-9	164035	164908	161051	219119	215108	215504	1.10262	7.13548e-06	1.326	0.407082	insig
Lmmp003767	UPLC-MS/MS	C21H18O12	Kaempferol-7-O-glucuronide	Flavonoids	Flavonols	-	128995	47820.6	138803	9	9	9	1.10183	0.067591	8.55464e-05	-13.5129	down
Lmfn003760	UPLC-MS/MS	C21H18O13	Quercetin-4'-O-glucuronide	Flavonoids	Flavonols	201463-36-7	388318	393641	1.27548e+06	54203.8	221011	53744.1	0.929177	0.18628	0.159887	-2.64487	insig
Hmjp003123	UPLC-MS/MS	C21H18O13	Quercetin-5-O-glucuronide	Flavonoids	Flavonols	-	1.47777e+06	1.76081e+06	5.50278e+06	34415.1	335422	86635.2	0.993497	0.16637	0.0522198	-4.25926	insig
Lmlp003531	UPLC-MS/MS	C21H20O11	Luteolin-3'-O-glucoside*	Flavonoids	Flavones	-	4.45557e+06	5.03037e+06	6.05014e+06	149472	98971.2	93599.4	1.10017	0.00829583	0.022016	-5.5053	down
Hmpp003270	UPLC-MS/MS	C21H20O11	Luteolin-4'-O-glucoside*	Flavonoids	Flavones	6920-38-3	4.7951e+06	4.70807e+06	5.73535e+06	137156	67606.5	72981.9	1.09732	0.00417843	0.0182264	-5.77782	down
mws1608	UPLC-MS/MS	C21H20O11	Luteolin-6-C-glucoside (Isoorientin)	Flavonoids	Flavones	4261-42-1	20971	8086.55	2551.99	64573	21110.6	10472.4	0.648989	0.322905	3.04199	1.60502	insig
MWS20150	UPLC-MS/MS	C21H20O11	Luteolin-7-O-glucoside (Cynaroside)*	Flavonoids	Flavones	5373-11-05	4.28752e+06	5.2235e+06	5.6545e+06	9	9	9	1.10476	0.00631055	1.78035e-06	-19.0994	down
mws1299	UPLC-MS/MS	C21H20O11	Luteolin-8-C-glucoside (Orientin)	Flavonoids	Flavones	28608-75-5	66941.5	9634.92	31954.8	76668.9	42282.6	78197.2	0.632118	0.228713	1.81651	0.861173	insig
mws0913	UPLC-MS/MS	C21H20O11	Kaempferol-3-O-galactoside (Trifolin)*	Flavonoids	Flavonols	23627-87-4	147599	88161.6	105621	30850.2	57757.6	34733.2	0.998906	0.0365933	0.3613	-1.46873	insig
mws2209	UPLC-MS/MS	C21H20O11	Kaempferol-3-O-glucoside (Astragalin)	Flavonoids	Flavonols	480-10-4	4.45557e+06	5.03037e+06	6.05014e+06	149472	98971.2	93599.4	1.10017	0.00829583	0.022016	-5.5053	down
mws0089	UPLC-MS/MS	C21H20O11	Kaempferol-7-O-glucoside*	Flavonoids	Flavonols	16290-07-6	136844	101510	120949	9	9	9	1.10465	0.00719999	7.51454e-05	-13.7	down
Hmcn001884	UPLC-MS/MS	C21H20O12	6-Hydroxyluteolin 5-glucoside	Flavonoids	Flavones	-	1.35239e+06	1.83125e+06	1.65023e+06	164192	342053	125850	1.05976	0.00340479	0.130764	-2.93497	down
pmp001309	UPLC-MS/MS	C21H20O12	6-Hydroxykaempferol-7-O-glucoside	Flavonoids	Flavonols	-	1.21547e+06	1.84866e+06	2.29402e+06	88530.7	156144	116080	1.08683	0.0330868	0.0673282	-3.89265	down
mws0061	UPLC-MS/MS	C21H20O12	Quercetin-3-O-galactoside (Hyperin)*	Flavonoids	Flavonols	482-36-0	2.39433e+06	2.98666e+06	3.08188e+06	70230	188760	90218.4	1.08611	0.00519641	0.0412636	-4.59899	down
mws0091	UPLC-MS/MS	C21H20O12	Quercetin-3-O-glucoside (Isoquercitrin)*	Flavonoids	Flavonols	482-35-9	1.51826e+06	2.00271e+06	1.99278e+06	57144.9	124229	47941.7	1.08581	0.00710927	0.0415898	-4.58763	down
mws0856	UPLC-MS/MS	C21H20O12	Quercetin-4'-O-glucoside (Spiraeoside)*	Flavonoids	Flavonols	20229-56-5	1.25084e+06	1.57214e+06	1.40269e+06	159328	310496	130920	1.0673	0.00101844	0.142165	-2.81436	down
Smgp004575	UPLC-MS/MS	C21H20O12	Quercetin-5-O-β-D-glucoside	Flavonoids	Flavonols	-	1.07477e+06	1.36709e+06	1.66739e+06	377127	458105	202590	1.02833	0.0149942	0.252557	-1.98532	down
mws1329	UPLC-MS/MS	C21H20O12	Quercetin-7-O-glucoside*	Flavonoids	Flavonols	491-50-9	1.30414e+06	1.83178e+06	1.65648e+06	127717	323662	146558	1.06304	0.00577147	0.124768	-3.00268	down
Cmbp005523	UPLC-MS/MS	C21H20O9	1,3-O-Dicaffeoylglycerol	Phenolic acids	Phenolic acids	-	304307	229016	320017	78362.3	54841.2	104086	1.05071	0.00760824	0.278071	-1.84648	down
mws1179	UPLC-MS/MS	C21H22O10	Naringenin-7-O-glucoside (Prunin)	Flavonoids	Flavanones	529-55-5	35825.4	43159.2	68408.5	37777.4	35566.4	25137.9	0.702697	0.235091	0.668157	-0.581742	insig
Lmlp005236	UPLC-MS/MS	C21H22O11	Dihydrokaempferol-3-O-glucoside	Flavonoids	Flavanonols	1049-08-8	278345	269860	331206	96958.7	205585	96707.6	0.944512	0.0291818	0.453998	-1.13924	insig
pmb3023	UPLC-MS/MS	C21H22O11	Eriodictyol-8-C-glucoside	Flavonoids	Flavanones	1023271-51-3	170516	150086	191401	34131.7	28412.3	60617.9	1.05179	0.00129183	0.24055	-2.05559	down
Lmtn002796	UPLC-MS/MS	C21H22O11	Aromadendrin-7-O-glucoside	Flavonoids	Flavanonols	28189-90-4	43512.2	58815.5	50602.8	40803.9	49642.5	44439	0.557826	0.319163	0.882005	-0.181142	insig
Xmsn002700	UPLC-MS/MS	C21H22O12	Taxifolin-3'-O-glucoside	Flavonoids	Flavanonols	31106-05-5	623727	810783	1.04516e+06	74753.1	59759	45038.7	1.09078	0.023895	0.0724092	-3.78768	down
mws0043	UPLC-MS/MS	C21H22O8	Nobiletin (5,6,7,8,3',4'-Hexamethoxyflavone)	Flavonoids	Flavones	478-01-3	42625.3	35922.5	34095.1	43316.3	37828.9	46584.4	0.631186	0.239264	1.13393	0.181337	insig
Lmyp004617	UPLC-MS/MS	C21H22O9	Pinocembrin-7-O-glucoside (Pinocembroside)	Flavonoids	Flavanones	75829-43-5	1.98348e+06	2.38602e+06	2.10518e+06	63249.4	89071.7	50137.8	1.09919	0.00300937	0.0312694	-4.99911	down
HJN055	UPLC-MS/MS	C21H24O10	Dihydrocharcone-4'-O-glucoside	Flavonoids	Chalcones	-	71955.2	27693.6	29128.6	190158	135640	166277	1.0065	0.00494195	3.82113	1.934	up
mws2118	UPLC-MS/MS	C21H24O10	Phloretin-2'-O-glucoside (Phlorizin)	Flavonoids	Chalcones	60-81-1	52859.9	39849.8	49001.9	16446.4	26531.6	57381.9	0.592882	0.381346	0.708198	-0.497776	insig
Hmpn005101	UPLC-MS/MS	C21H24O11	Sieboldin	Flavonoids	Chalcones	18777-73-6	6303.55	3784.17	4561.35	99001.1	70824.6	55256.3	1.0905	0.0313647	15.3649	3.94157	up
Zmdn002400	UPLC-MS/MS	C21H24O11	Epicatechin-3'-O-β-D-glucopyranoside*	Flavonoids	Flavanols	-	1.30346e+06	1.32273e+06	1.23096e+06	5.37426e+07	3.681e+07	3.74394e+07	1.10222	0.0174697	33.1831	5.05238	up
Zmdn002049	UPLC-MS/MS	C21H24O11	Epicatechin-4'-O-β-D-glucopyranoside*	Flavonoids	Flavanols	-	1.27711e+06	1.20397e+06	1.29261e+06	5.27395e+07	3.55896e+07	3.78842e+07	1.10227	0.0169046	33.4455	5.06374	up
Zajn002491	UPLC-MS/MS	C21H24O11	catechin-4-β-D-galactopyranoside*	Flavonoids	Flavanols	-	1.30822e+06	1.26854e+06	1.25469e+06	5.29774e+07	3.48475e+07	3.72312e+07	1.10194	0.0192422	32.6394	5.02854	up
pmb0478	UPLC-MS/MS	C21H26O11	Coumarin O-rutinoside	Lignans and Coumarins	Coumarins	-	14610.8	22129.1	12057.4	279812	311888	297376	1.09645	0.000398551	18.2198	4.18743	up
pmb2723	UPLC-MS/MS	C21H26O13	4-Hydroxycoumarin di-glucoside	Lignans and Coumarins	Coumarins	-	24533.3	21834.9	17929.9	1.28952e+06	1.06434e+06	863459	1.10194	0.0134172	50.0375	5.64494	up
pmb0530	UPLC-MS/MS	C21H27N7O14P2	Nicotinic acid adenine dinucleotide	Nucleotides and derivatives	Nucleotides and derivatives	53-84-9	1.92339e+06	2.37207e+06	2.3913e+06	28327.1	33721.5	42439.8	1.10267	0.00479443	0.0156262	-5.99989	down
pmp001247	UPLC-MS/MS	C21H32NO9+	Feruloylcholine glucoside	Alkaloids	Phenolamine	-	164622	202059	349264	150526	152025	34342.8	0.702324	0.147809	0.470557	-1.08756	insig
Lmhp011562	UPLC-MS/MS	C21H36O4	1-α-Linolenoyl-glycerol*	Lipids	Glycerol ester	-	15437.6	26709.6	26848.4	600818	659572	745518	1.09753	0.00396629	29.073	4.86161	up
Lmhp011388	UPLC-MS/MS	C21H36O4	2-α-Linolenoyl-glycerol*	Lipids	Glycerol ester	55268-58-1	8832.84	9683.37	15856.1	462955	854070	929698	1.09426	0.0363524	65.3643	6.03043	up
Lmhp112042	UPLC-MS/MS	C21H38O4	1-Linoleoylglycerol*	Lipids	Glycerol ester	2277-28-3	9	9	9	74445.5	101186	78298.6	1.10458	0.00958416	9404.81	13.1992	up
Lmhp012042	UPLC-MS/MS	C21H38O4	2-Linoleoylglycerol*	Lipids	Glycerol ester	3443-82-1	26336	30038.7	30323.7	24427.6	27232.4	28819.8	0.543588	0.317409	0.928273	-0.107379	insig
pmb0296	UPLC-MS/MS	C21H40O4	1-Oleoyl-Sn-Glycerol	Lipids	Glycerol ester	129784-87-8	15541.2	30508.3	10407.3	334727	456096	213216	1.06918	0.044983	17.7842	4.15252	up
Lmhp009034	UPLC-MS/MS	C21H42NO7P	LysoPE 16:1	Lipids	LPE	-	17798.6	25182.3	19839.2	1.09428e+06	1.21619e+06	701013	1.09929	0.0240913	47.9382	5.5831	up
Lmhp008763	UPLC-MS/MS	C21H42NO7P	LysoPE 16:1(2n isomer)	Lipids	LPE	-	13740.4	33076.8	17600.8	1.15949e+06	1.28654e+06	799095	1.09271	0.018303	50.3761	5.65467	up
pmb0876	UPLC-MS/MS	C21H44NO7P	LysoPE 16:0	Lipids	LPE	53862-35-4	128129	128139	120697	8.92844e+06	9.41462e+06	6.70748e+06	1.10353	0.0101085	66.4533	6.05427	up
pmp000575	UPLC-MS/MS	C22H22O10	Acacetin-7-O-glucoside (Tilianin)	Flavonoids	Flavones	4291-60-5	114344	154658	129456	9979.9	16000	10513.9	1.09365	0.00804643	0.0915874	-3.44871	down
pmb2999	UPLC-MS/MS	C22H22O11	Chrysoeriol-5-O-glucoside	Flavonoids	Flavones	-	163060	180394	158227	110289	111563	64972.6	0.936591	0.0279848	0.571726	-0.806603	insig
pma6640	UPLC-MS/MS	C22H22O12	3'-O-Methyltricetin-7-O-glucoside	Flavonoids	Flavones	-	504018	1.05453e+06	629618	98124.5	105060	131372	1.07045	0.0650846	0.152894	-2.7094	down
Lmjp002906	UPLC-MS/MS	C22H22O12	Rhamnetin-3-O-Glucoside*	Flavonoids	Flavonols	27875-34-9	274323	889183	938623	111171	139810	145536	0.975637	0.116617	0.188627	-2.40639	insig
Lmjp003044	UPLC-MS/MS	C22H22O12	Isorhamnetin-3-O-Glucoside*	Flavonoids	Flavonols	5041-82-7	710336	1.13627e+06	1.29522e+06	9	9	9	1.10432	0.0266897	8.59374e-06	-16.8283	down
pme1598	UPLC-MS/MS	C22H24O11	Hesperetin-5-O-glucoside	Flavonoids	Flavanones	69651-80-5	1.41709e+06	1.82455e+06	1.74318e+06	161763	365065	174123	1.06746	0.00193869	0.140617	-2.83016	down
Lmzp002365	UPLC-MS/MS	C22H24O11	Hesperetin-7-O-glucoside	Flavonoids	Flavanones	31712-49-9	72174.5	81613.8	104146	61780.5	53399.6	108895	0.383556	0.605645	0.86873	-0.20302	insig
pmb3055	UPLC-MS/MS	C22H26O14	p-Coumaroylquinic acid-4'-O-glucuronide	Phenolic acids	Phenolic acids	-	81719	187793	205820	9	9	9	1.10285	0.0548421	5.68024e-05	-14.1037	down
MWS20152	UPLC-MS/MS	C22H26O8	Syringaresinol	Lignans and Coumarins	Lignans	21453-71-4	16274	27520.8	6622.95	22384.7	56275.9	85724.7	0.79602	0.164394	3.26046	1.70508	insig
Hmbn002692	UPLC-MS/MS	C22H30O14	6'-O-Feruloyl-D-sucrose	Phenolic acids	Phenolic acids	118230-77-6	1.77723e+06	1.40179e+06	4.24659e+06	9178.53	10523.5	11310.4	1.09609	0.10987	0.00417641	-7.90352	down
mws0371	UPLC-MS/MS	C22H32O2	Cis-4,7,10,13,16,19-Docosahexaenoic Acid	Lipids	Free fatty acids	6217-54-5	73639.9	70706.4	68206.1	77556.1	76825.7	71007.7	0.701751	0.18029	1.06039	0.0846011	insig
Lmyn011997	UPLC-MS/MS	C22H42O2	Erucic acid	Lipids	Free fatty acids	112-86-7	8.8166e+06	8.80173e+06	8.781e+06	9.03527e+06	9.26436e+06	8.75427e+06	0.657092	0.27689	1.02479	0.0353351	insig
Lmhp009769	UPLC-MS/MS	C22H44NO7P	LysoPE 17:1	Lipids	LPE	-	13335.7	7489.91	11238.2	400272	487292	345989	1.09854	0.0102954	38.4717	5.26573	up
Lmhp009464	UPLC-MS/MS	C22H44NO7P	LysoPE 17:1(2n isomer)	Lipids	LPE	-	7385.16	9446.34	5455.36	402943	508593	351512	1.10001	0.0122287	56.6723	5.82457	up
Hmyn007168	UPLC-MS/MS	C22H45O9P	LysoPG 16:0	Lipids	Glycerol ester	-	17835	14232.6	14166.1	2.50718e+06	2.88916e+06	2.32291e+06	1.10405	0.00422201	166.961	7.38337	up
pmd0130	UPLC-MS/MS	C22H46NO7P	LysoPC 14:0	Lipids	LPC	20559-16-4	6026.48	2565.69	7578.7	553359	664616	400196	1.09198	0.0199558	100.067	6.64482	up
Lmhp010162	UPLC-MS/MS	C22H46NO7P	LysoPE 17:0	Lipids	LPE	-	11165.1	13684.1	17363.4	1.01612e+06	1.38845e+06	902618	1.10105	0.0176845	78.3461	6.29179	up
Hmln002199	UPLC-MS/MS	C23H22O13	Quercetin-3-O-(6''-O-acetyl)galactoside	Flavonoids	Flavonols	-	50570.9	86562.7	110336	7266.63	8397.45	19332.3	1.03335	0.0493747	0.141416	-2.82198	down
pmb3041	UPLC-MS/MS	C23H22O14	Tricin-7-O-saccharic acid	Flavonoids	Flavones	-	333824	594012	339532	373209	414974	348790	0.202984	0.66608	0.897114	-0.156636	insig
Hmcp001636	UPLC-MS/MS	C23H24O13	Limocitrin-7-O-glucoside	Flavonoids	Flavonols	-	748045	896905	826992	1.23788e+06	1.15167e+06	1.02219e+06	0.998548	0.0186889	1.38019	0.464865	insig
Lmhp008801	UPLC-MS/MS	C23H42NO7P	LysoPE 18:3	Lipids	LPE	-	23012.5	27267.2	27292.5	1.22408e+06	1.41855e+06	804159	1.10007	0.0250768	44.4333	5.47357	up
Lmhp008589	UPLC-MS/MS	C23H42NO7P	LysoPE 18:3(2n isomer)	Lipids	LPE	-	22282.4	28940.1	20047.2	1.0506e+06	1.20579e+06	725552	1.09952	0.0205816	41.8402	5.38682	up
pmb0881	UPLC-MS/MS	C23H44NO7P	LysoPE 18:2	Lipids	LPE	-	12944.2	12224.6	9048.99	1.60412e+06	1.75743e+06	1.20577e+06	1.10266	0.0116283	133.477	7.06045	up
pmb0874	UPLC-MS/MS	C23H44NO7P	LysoPE 18:2(2n isomer)	Lipids	LPE	-	16265.3	20741.4	13077.7	1.62319e+06	1.81211e+06	1.21578e+06	1.10157	0.0128977	92.8648	6.53706	up
pmb2260	UPLC-MS/MS	C23H46NO7P	LysoPC 15:1	Lipids	LPC	-	38820	74229.7	39924.8	3.26239e+06	3.52664e+06	2.3242e+06	1.09713	0.0145224	59.5735	5.8966	up
mws0289	UPLC-MS/MS	C23H46NO7P	LysoPE 18:1	Lipids	LPE	89576-29-4	182813	220212	187887	2.92432e+07	3.05525e+07	1.89299e+07	1.10253	0.0193382	133.227	7.05775	up
pmb0856	UPLC-MS/MS	C23H46NO7P	LysoPE 18:1(2n isomer)	Lipids	LPE	-	141034	135934	132220	1.69794e+07	2.03663e+07	1.05302e+07	1.10119	0.0316746	117.002	6.87039	up
pmb2319	UPLC-MS/MS	C23H48NO7P	LysoPC 15:0	Lipids	LPC	108273-89-8	105103	95699.7	113032	1.29813e+07	1.6132e+07	1.06024e+07	1.10329	0.0145431	126.55	6.98356	up
Lmhp009129	UPLC-MS/MS	C23H48NO7P	LysoPC 15:0(2n isomer)	Lipids	LPC	-	93666.6	82194.1	103261	1.40661e+07	1.4996e+07	9.94343e+06	1.10308	0.014158	139.744	7.12664	up
pmb0883	UPLC-MS/MS	C23H48NO7P	LysoPE 18:0	Lipids	LPE	69747-55-3	18619.4	19914.3	28607	1.15165e+06	1.01814e+06	848863	1.10108	0.00777534	44.9601	5.49057	up
pmb0880	UPLC-MS/MS	C23H48NO7P	LysoPE 18:0(2n isomer)	Lipids	LPE	-	4372.75	7668.8	9030.3	436777	507231	296170	1.09534	0.0224777	58.8547	5.87909	up
pmp000587	UPLC-MS/MS	C24H22O14	Luteolin-7-O-(6''-malonyl)glucoside	Flavonoids	Flavones	-	110359	70783.1	93695.7	10475.1	4232.54	9574.2	1.07058	0.0161813	0.0883496	-3.50063	down
Lmdp004892	UPLC-MS/MS	C24H22O14	Kaempferol-3-O-(6''-malonyl)galactoside*	Flavonoids	Flavonols	-	81651.8	68667.2	63389.6	10242.4	15254.9	25893.9	1.036	0.00178377	0.240474	-2.05605	down
Lmmp003817	UPLC-MS/MS	C24H22O14	Kaempferol-3-O-(6''-malonyl)glucoside*	Flavonoids	Flavonols	-	100146	91608.9	110223	16741.6	4949.45	14715.5	1.04317	0.000362437	0.12056	-3.05217	down
Lmsn004322	UPLC-MS/MS	C24H24O12	1,6-Di-O-caffeoyl-β-D-glucose*	Phenolic acids	Phenolic acids	-	352797	268590	280485	127539	63110.8	89333	1.03695	0.00426552	0.310447	-1.68758	down
Lmsn004970	UPLC-MS/MS	C24H24O12	3,6-Di-O-caffeoyl glucose*	Phenolic acids	Phenolic acids	-	261620	293749	295157	66098	59121.9	40963.7	1.08656	0.000155628	0.195389	-2.35558	down
Li512111	UPLC-MS/MS	C24H24O13	Isorhamnetin-3-O-(6''-acetylglucoside)	Flavonoids	Flavonols	-	127396	250682	215439	2710.01	4508.24	10640	1.07324	0.034137	0.0300888	-5.05463	down
pma0791	UPLC-MS/MS	C24H24O13	Naringenin-7-O-(6''-malonyl)glucoside	Flavonoids	Flavanones	-	163254	190604	274639	19034	13743.1	26781.7	1.08195	0.0285299	0.0947638	-3.39952	down
pmb0686	UPLC-MS/MS	C24H24O14	Eriodictyol-7-O-(6''-malonyl)glucoside	Flavonoids	Flavanones	-	113672	185581	132623	36567.1	41008.7	41303.3	1.07546	0.0393983	0.275262	-1.86112	down
pmn001710	UPLC-MS/MS	C24H26O13	Rosmarinic acid-3'-O-glucoside	Phenolic acids	Phenolic acids	910028-78-3	62866	78904.8	65738.5	448038	589901	392935	1.09365	0.0194789	6.89547	2.78565	up
pmb2653	UPLC-MS/MS	C24H42O20	DMelezitose O-rhamnoside	Others	Saccharides	-	255179	166048	203278	216346	163519	95534.2	0.54979	0.321835	0.761241	-0.393575	insig
mws1593	UPLC-MS/MS	C24H42O21	D-Maltotetraose	Others	Saccharides	34612-38-9	1.45355e+06	1.05431e+06	1.11026e+06	660688	716704	645375	1.03763	0.0472261	0.559065	-0.838911	insig
Lmqn000213	UPLC-MS/MS	C24H42O21	Stachyose	Others	Saccharides	470-55-3	2.8838e+06	2.22831e+06	2.30404e+06	2.2957e+06	1.94582e+06	1.22231e+06	0.692827	0.171417	0.736749	-0.440755	insig
mws4163	UPLC-MS/MS	C24H42O21	Nystose	Others	Saccharides	13133-07-8	2.76749e+06	1.497e+06	1.13504e+06	617922	586829	266982	0.952559	0.111673	0.272566	-1.87532	insig
pma1303	UPLC-MS/MS	C24H46NO7P	LysoPC 16:2	Lipids	LPC	-	9519.92	6284.6	6645.4	238189	275824	198457	1.10021	0.00918743	31.736	4.98805	up
pmb0863	UPLC-MS/MS	C24H46NO7P	LysoPC 16:2(2n isomer)	Lipids	LPC	-	1329.5	5276.42	5488.3	219524	299297	182642	1.07635	0.0215773	57.9999	5.85798	up
pmp001270	UPLC-MS/MS	C24H48NO7P	LysoPC 16:1	Lipids	LPC	76790-27-7	48105.9	39998.3	44922.6	8.06779e+06	8.26064e+06	5.29075e+06	1.10296	0.0174761	162.517	7.34445	up
Lmhp008833	UPLC-MS/MS	C24H48NO7P	LysoPC 16:1(2n isomer)	Lipids	LPC	-	13607.7	45764.2	49874.2	8.74563e+06	8.60179e+06	5.5478e+06	1.09058	0.0183232	209.575	7.71132	up
pmb0855	UPLC-MS/MS	C24H50NO7P	LysoPC 16:0	Lipids	LPC	17364-16-8	22690.6	22830.8	22696.5	2.28929e+06	2.40555e+06	1.75089e+06	1.10391	0.00887859	94.4874	6.56205	up
pmd0132	UPLC-MS/MS	C24H50NO7P	LysoPC 16:0(2n isomer)	Lipids	LPC	-	16529.3	24545.3	27761.3	2.31643e+06	2.45751e+06	1.74256e+06	1.10114	0.0101767	94.6672	6.56479	up
Lmhn003801	UPLC-MS/MS	C25H24O13	Feruloylsinapoyltartaric acid	Phenolic acids	Phenolic acids	-	67978.3	53699.8	186803	32888	81480.4	57362	0.522298	0.396073	0.556697	-0.845036	insig
HJAP064	UPLC-MS/MS	C25H24O15	Isorhamnetin-3-O-(6''-malonyl)glucoside	Flavonoids	Flavonols	-	673345	1.07983e+06	841462	17018.2	9	25235.1	0.853466	0.0183501	0.0162883	-5.94002	insig
HJAP010	UPLC-MS/MS	C25H26O14	Luteolin-6,8-di-C-arabinoside	Flavonoids	Flavones	-	9919.7	30094.4	5091.68	206857	181824	171185	1.03496	0.000334046	12.4123	3.6337	up
pma0692	UPLC-MS/MS	C25H31N3O4	N1,N10-Bis(p-coumaroyl)spermidine	Alkaloids	Phenolamine	114916-05-1	6337.23	4037	8142.39	182844	262135	152311	1.0928	0.0274592	32.257	5.01154	up
pmp001141	UPLC-MS/MS	C25H31NO10	Cimicifugamide	Alkaloids	Phenolamine	-	125861	161326	156832	92993.1	120407	201315	0.260821	0.798435	0.934002	-0.0985023	insig
GQ512004	UPLC-MS/MS	C25H33N3O5	N1-Dihydrocaffeoyl-N10-coumaroylspermidine	Alkaloids	Phenolamine	-	168837	205288	45938.8	219656	108260	34138.9	0.16779	0.802562	0.861906	-0.214398	insig
Lmhp009497	UPLC-MS/MS	C25H44NO7P	LysoPE 20:4	Lipids	LPE	-	8086.78	5369.24	3497.33	90012.1	119997	81247	1.08635	0.0151271	17.1799	4.10265	up
Lmhp009349	UPLC-MS/MS	C25H44NO7P	LysoPE 20:4(2n isomer)	Lipids	LPE	-	7119	4879.04	5691.48	97037.3	104906	89581	1.10099	0.00194706	16.48	4.04265	up
Lmhp008718	UPLC-MS/MS	C25H48NO7P	LysoPC 17:2	Lipids	LPC	-	16346.1	15749.5	12782.1	1.94244e+06	1.7177e+06	1.50863e+06	1.10387	0.00533262	115.175	6.84768	up
Lmhp010757	UPLC-MS/MS	C25H48NO7P	LysoPE 20:2	Lipids	LPE	-	16074	6656.71	18928.2	294121	320960	228496	1.0791	0.00940079	20.2496	4.33982	up
Lmhp010514	UPLC-MS/MS	C25H48NO7P	LysoPE 20:2(2n isomer)	Lipids	LPE	-	10635.3	5277.03	5416.99	272388	334474	242346	1.09532	0.00929689	39.8141	5.31521	up
Lmhp009590	UPLC-MS/MS	C25H50NO7P	LysoPC 17:1	Lipids	LPC	-	24768.5	14934.1	17836.1	2.84227e+06	3.47032e+06	2.42783e+06	1.10207	0.0107801	151.905	7.24703	up
pmb2406	UPLC-MS/MS	C25H52NO7P	LysoPC 17:0	Lipids	LPC	50930-23-9	143104	141921	157418	1.76249e+07	1.99246e+07	1.25664e+07	1.10297	0.0167948	113.271	6.82363	up
Lmhp010515	UPLC-MS/MS	C25H52NO7P	LysoPC 17:0(2n isomer)	Lipids	LPC	-	27392.4	17438.2	16873.2	2.96199e+06	4.5279e+06	3.04576e+06	1.10126	0.0205637	170.745	7.4157	up
Lmjp003731	UPLC-MS/MS	C26H26O12	3,4-O-Dicaffeoylquinic Acid Methyl Ester	Phenolic acids	Phenolic acids	-	12888.8	25471.2	47031.9	32549.5	23945	12763	0.170767	0.670065	0.811055	-0.302129	insig
pmn001378	UPLC-MS/MS	C26H32O11	Pinoresinol-4-O-glucoside	Lignans and Coumarins	Lignans	41607-20-9	483657	371074	361405	225753	242034	257507	1.02802	0.0466404	0.596392	-0.745668	insig
Cmsp003083	UPLC-MS/MS	C26H32O11	Dehydrodiconiferyl alcohol-4-O-glucoside	Lignans and Coumarins	Lignans	107870-88-2	38683.9	27074.9	51184.9	36302.3	66182	41532.2	0.409217	0.48121	1.2315	0.30042	insig
Lmyn003971	UPLC-MS/MS	C26H34O11	Dihydrodehydrodiconiferyl alcohol-4-O-glucoside	Lignans and Coumarins	Lignans	-	30264.2	44735.3	32513.1	267559	314268	284537	1.09654	0.00127413	8.05825	3.01047	up
Lmmn002274	UPLC-MS/MS	C26H34O11	Isolariciresinol-9'-O-glucoside	Lignans and Coumarins	Lignans	63358-12-3	29160.8	9059.51	12202.3	253500	268827	284431	1.07362	5.00591e-05	15.9999	3.99999	up
Hmln003754	UPLC-MS/MS	C26H34O11	Icariside E5	Others	Ketone compounds	126176-79-2	65456.2	69601.3	62088.4	425204	729557	605734	1.09238	0.027509	8.92991	3.15865	up
Lmtn003096	UPLC-MS/MS	C26H36O11	Secoisolariciresinol 4-O-glucoside	Lignans and Coumarins	Lignans	-	185418	192829	221178	322942	418128	517947	1.0232	0.0550421	2.10038	1.07065	up
pmb0854	UPLC-MS/MS	C26H48NO7P	LysoPC 18:3	Lipids	LPC	-	93458.4	96796.3	146641	1.31023e+07	1.39658e+07	9.03024e+06	1.10099	0.0159008	107.15	6.74349	up
pmb0865	UPLC-MS/MS	C26H48NO7P	LysoPC 18:3(2n isomer)	Lipids	LPC	-	95034	93390.2	89592.6	1.05192e+07	9.56882e+06	7.03196e+06	1.10342	0.0132634	97.548	6.60804	up
pmp001273	UPLC-MS/MS	C26H50NO7P	LysoPC 18:2	Lipids	LPC	-	20305.1	27104.4	22774.8	2.76526e+06	2.74236e+06	2.02107e+06	1.10318	0.00951722	107.27	6.74511	up
pmp001251	UPLC-MS/MS	C26H50NO7P	LysoPC 18:2(2n isomer)	Lipids	LPC	-	13088	13223.2	10865.7	2.36163e+06	2.45803e+06	1.69399e+06	1.10349	0.0121569	175.207	7.45292	up
pmp001281	UPLC-MS/MS	C26H52NO7P	LysoPC 18:1	Lipids	LPC	-	79401.5	106348	91845.3	2.46048e+07	1.98957e+07	1.60028e+07	1.10328	0.0150009	217.955	7.76789	up
Lmhp010190	UPLC-MS/MS	C26H52NO7P	LysoPC 18:1(2n isomer)	Lipids	LPC	-	567334	682815	443174	1.62477e+07	1.89225e+07	1.01901e+07	1.09489	0.0300032	26.7877	4.7435	up
mws0126	UPLC-MS/MS	C26H54NO7P	LysoPC 18:0	Lipids	LPC	19420-57-6	164500	172771	173327	1.28134e+07	1.46755e+07	8.51533e+06	1.10169	0.0229534	70.5137	6.13983	up
pmd0136	UPLC-MS/MS	C26H54NO7P	LysoPC 18:0(2n isomer)	Lipids	LPC	-	172044	193657	200199	1.53163e+07	1.73532e+07	1.01084e+07	1.10158	0.0227043	75.5926	6.24017	up
pmp000241	UPLC-MS/MS	C27H28O17	Luteolin-6-C-(2''-glucuronyl)glucoside	Flavonoids	Flavones	-	37210.6	14349.5	79166.5	117797	55833.5	87011.8	0.692886	0.172412	1.9938	0.995519	insig
mws0047	UPLC-MS/MS	C27H30O14	Apigenin-7-O-neohesperidoside (Rhoifolin)	Flavonoids	Flavones	17306-46-6	298299	398678	420961	73052.9	95748	103779	1.08106	0.0134915	0.243824	-2.03609	down
pme0368	UPLC-MS/MS	C27H30O14	Apigenin-7-O-rutinoside (Isorhoifolin)	Flavonoids	Flavones	552-57-8	334299	317704	403859	73274.5	115092	102580	1.07579	0.00387593	0.275554	-1.85959	down
pmp001111	UPLC-MS/MS	C27H30O14	Violanthin	Flavonoids	Flavones	40581-17-7	163591	46664.8	119291	3.5674e+06	3.41613e+06	2.73108e+06	1.07912	0.0059894	29.4787	4.8816	up
pme1605	UPLC-MS/MS	C27H30O15	Kaempferol-3-O-robinobioside(Biorobin)*	Flavonoids	Flavonols	17297-56-2	245566	255748	224767	33270.1	102910	12295.4	0.932158	0.0127532	0.204489	-2.2899	insig
Lmsn002815	UPLC-MS/MS	C27H30O15	Kaempferol-3-O-rutinoside(Nicotiflorin)*	Flavonoids	Flavonols	17650-84-9	73993.6	71339.9	75205.1	39862.6	52999.6	31303.7	0.982799	0.0329908	0.563012	-0.828762	insig
Lmsp004166	UPLC-MS/MS	C27H30O16	Quercetin-3-O-glucoside-7-O-rhamnoside*	Flavonoids	Flavonols	-	140508	440575	356235	19338.4	90333.8	11316.1	0.94257	0.0835271	0.129079	-2.95367	insig
Lmjp002461	UPLC-MS/MS	C27H30O16	Quercetin-3-O-neohesperidoside*	Flavonoids	Flavonols	117611-67-3	171226	465967	688575	77812.8	120321	28283.2	0.916938	0.13026	0.170782	-2.54977	insig
Lssp210058	UPLC-MS/MS	C27H30O16	Quercetin-3-O-robinobioside*	Flavonoids	Flavonols	52525-35-6	179126	547706	549494	30148.9	99477	49867.9	0.981502	0.0933611	0.140633	-2.82999	insig
MWSHY0067	UPLC-MS/MS	C27H30O16	Quercetin-3-O-rutinoside (Rutin)*	Flavonoids	Flavonols	153-18-4	193987	641309	599660	34896.1	86370.9	31471.5	1.00658	0.0935042	0.106441	-3.23187	down
Smhp003438	UPLC-MS/MS	C27H30O16	Luteolin-6,8-di-C-glucoside	Flavonoids	Flavones	29428-58-8	1.20097e+06	1.20004e+06	1.59984e+06	1.1348e+06	1.14032e+06	861293	0.742076	0.158506	0.783937	-0.351191	insig
Zmxp003107	UPLC-MS/MS	C27H30O16	Luteolin-7,3'-di-O-glucoside	Flavonoids	Flavones	52187-80-1	43961.6	36158.4	27922.8	15147.1	20048.3	22357.7	0.964769	0.0502377	0.532688	-0.908638	insig
Hmcp001598	UPLC-MS/MS	C27H30O16	Isorhamnetin-3-O-(2''-O-xylosyl)glucoside	Flavonoids	Flavonols	-	609676	638609	1.27801e+06	26812.9	67965	19598.8	1.0642	0.0656917	0.0452745	-4.46516	down
Zmhp102730	UPLC-MS/MS	C27H30O17	6-Hydroxykaempferol-3,6-O-Diglucoside*	Flavonoids	Flavonols	-	2.83158e+06	3.96083e+06	5.81311e+06	175136	634487	162971	1.04047	0.0429774	0.0771562	-3.69607	down
pmp001311	UPLC-MS/MS	C27H30O17	6-Hydroxykaempferol-7,6-O-Diglucoside*	Flavonoids	Flavonols	-	4.53746e+06	4.60914e+06	8.25076e+06	245442	918917	233881	1.03869	0.0449264	0.0803709	-3.63718	down
Zmcp002666	UPLC-MS/MS	C27H30O17	Quercetin-3,7-Di-O-glucoside	Flavonoids	Flavonols	-	2.55214e+06	2.49855e+06	5.51154e+06	223084	711486	317866	1.0282	0.0861957	0.118577	-3.07611	down
pme2746	UPLC-MS/MS	C27H33N9O15P2	Riboflavin 5'-Adenosine Diphosphate	Nucleotides and derivatives	Nucleotides and derivatives	146-14-5	267316	317746	360350	3388.4	14419.2	7931.92	1.07766	0.00697329	0.0272257	-5.19889	down
Lmmn002260	UPLC-MS/MS	C27H36O12	5'-Methoxyisolariciresinol-9'-O-glucoside	Lignans and Coumarins	Lignans	-	55714.5	68710.1	81650.6	241296	263788	209213	1.08197	0.00288978	3.46619	1.79335	up
MWSmce685	UPLC-MS/MS	C27H42O3	Spirosta-5-ene-3-ol (Yamogenin)	Steroids	Steroid	512-06-1	707482	1.62294e+06	645109	80296.6	52133.5	152489	1.03859	0.103706	0.0957541	-3.38452	down
Zjhp082603	UPLC-MS/MS	C27H42O3	Diosgenin	Steroids	Steroid	-	2.89101e+06	3.21009e+06	3.70973e+06	31595.1	49618.7	79714.9	1.09572	0.00531408	0.0164032	-5.92988	down
mws1620	UPLC-MS/MS	C27H42O4	Spirost-5-ene-1,3-diol (Ruscogenin)	Steroids	Steroid	472-11-7	130298	234588	86162.5	54583.9	32166.2	109040	0.763746	0.184479	0.434077	-1.20398	insig
pmp001020	UPLC-MS/MS	C27H43NO2	Korseveridine	Alkaloids	Steroid alkaloids	20072-14-4	9	9	9	2.33028e+06	3.35458e+06	3.29082e+06	1.10459	0.0120421	332433	18.3427	up
pmp001018	UPLC-MS/MS	C27H43NO2	Puqiedinone	Alkaloids	Steroid alkaloids	96997-98-7	36243.8	68274.3	87317.6	3.80494e+06	1.9902e+06	3.52153e+06	1.0892	0.0325901	48.5659	5.60187	up
Zjzp081802	UPLC-MS/MS	C27H44O3	Spirostan-3-ol (Isosarsapogenin)	Steroids	Steroid	-	2.60989e+06	1.84235e+06	2.28907e+06	778408	1.14593e+06	1.48382e+06	0.947321	0.0214459	0.505563	-0.984036	insig
pmp001034	UPLC-MS/MS	C27H44O4	Spirostane-2,3-diol (Markogenin)	Steroids	Steroidal saponins	562-35-6	1.43076e+07	1.58378e+07	1.79752e+07	124915	160349	203843	1.10254	0.00444243	0.0101642	-6.62036	down
pmp001026	UPLC-MS/MS	C27H45NO3	Verticine	Alkaloids	Steroid alkaloids	23496-41-5	6714.82	10151.8	5861.05	284096	221058	266278	1.09918	0.00542197	33.9424	5.08502	up
Lmhp009773	UPLC-MS/MS	C27H46O9	1-α-Linolenoyl-glycerol-3-O-glucoside*	Lipids	Glycerol ester	-	9	9	9	46424.2	41899.8	40240	1.10482	0.00185513	4761.63	12.2172	up
Lmhp009526	UPLC-MS/MS	C27H46O9	2-α-Linolenoyl-glycerol-1-O-glucoside*	Lipids	Glycerol ester	-	9	9	9	55142.7	47680.1	47820.5	1.10481	0.00240091	5579.38	12.4459	up
Lmhp007840	UPLC-MS/MS	C27H52NO7P	LysoPC 19:2	Lipids	LPC	-	9270.47	14533.5	63553.5	776421	729131	558731	1.04705	0.00686485	23.6303	4.56257	up
Lmhp007598	UPLC-MS/MS	C27H52NO7P	LysoPC 19:2(2n isomer)	Lipids	LPC	-	12376.8	46913.4	19551.1	822001	743122	714043	1.07832	0.00078923	28.9083	4.85341	up
Lmhp010908	UPLC-MS/MS	C27H54NO7P	LysoPC 19:1	Lipids	LPC	-	3058.68	1198.43	4788.64	1.194e+06	1.23242e+06	1.12153e+06	1.09506	0.00075038	392.224	8.61553	up
pmb2228	UPLC-MS/MS	C27H56NO7P	LysoPC 19:0	Lipids	LPC	108273-88-7	39357.2	5201.04	2887.26	272407	223156	180445	0.993248	0.00724695	14.2481	3.8327	insig
mws1661	UPLC-MS/MS	C28H32O15	Diosmetin-7-O-rutinoside (Diosmin)	Flavonoids	Flavones	520-27-4	47468.7	21335.4	33278.8	105496	54231	149133	0.905289	0.119828	3.02558	1.59721	insig
Lmmp002463	UPLC-MS/MS	C28H32O16	Sexangularetin-3-O-glucoside-7-O-rhamnoside	Flavonoids	Flavonols	-	566373	1.43764e+06	1.0337e+06	35492.5	75444.1	61090.9	1.0728	0.0626619	0.0566304	-4.14228	down
pmb0603	UPLC-MS/MS	C28H32O16	Chrysoeriol-7,4'-di-O-glucoside	Flavonoids	Flavones	-	28782	16971.5	19869.8	12236.9	17748.9	27126.3	0.319133	0.640878	0.870301	-0.200413	insig
MWSHY0064	UPLC-MS/MS	C28H32O16	Isorhamnetin-3-O-neohesperidoside	Flavonoids	Flavonols	55033-90-4	554921	1.30491e+06	1.25213e+06	16215.1	96965.7	47340.9	1.03495	0.0541307	0.0515821	-4.27699	down
Hmcp001578	UPLC-MS/MS	C28H32O17	Isorhamnetin-3,7-O-diglucoside	Flavonoids	Flavonols	6758-51-6	4.41364e+06	5.01875e+06	7.96341e+06	773336	941932	792263	1.0838	0.0452046	0.144146	-2.7944	down
Rfmb25702	UPLC-MS/MS	C28H34O12	Pinoresinol-4-O-(6''-acetyl)glucoside	Lignans and Coumarins	Lignans	-	52836.1	43696.1	54147.8	3830.86	2016.13	1913.17	1.09138	0.00368127	0.0515009	-4.27926	down
mws0036	UPLC-MS/MS	C28H34O15	Hesperetin-7-O-rutinoside (Hesperidin)	Flavonoids	Flavanones	520-26-3	72088.6	82929.4	25005	39538.9	42844.6	41236.5	0.349885	0.401162	0.68669	-0.542269	insig
pmb2970	UPLC-MS/MS	C28H34O16	Hesperetin-5,7-di-O-glucoside	Flavonoids	Flavanones	-	607836	685666	631494	10295.2	22646.3	26039.5	1.09089	0.000912928	0.0306396	-5.02846	down
pmb0645	UPLC-MS/MS	C28H34O16	Hesperetin-6-C-glucoside-7-O-glucoside	Flavonoids	Flavonols	-	434414	602240	1.14703e+06	362613	571343	519539	0.52581	0.376538	0.665614	-0.587242	insig
pmb0618	UPLC-MS/MS	C28H34O16	Hesperetin-8-C-glucoside-3'-O-glucoside	Flavonoids	Flavonols	-	1.6439e+06	1.96967e+06	2.932e+06	214295	424168	352204	1.06449	0.0380579	0.151349	-2.72405	down
Lmqn001932	UPLC-MS/MS	C28H36O13	Syringaresinol-4'-O-glucoside	Lignans and Coumarins	Lignans	7374-79-0	96157.5	155851	114588	49610.6	48247.8	59504.5	1.03482	0.0534537	0.429254	-1.2201	down
Hahn002315	UPLC-MS/MS	C28H36O13	syringaresinol-4-O-β-D-glucopyranoside	Others	Others	-	41494.2	86676.2	57104.4	84245.2	87449.4	112530	0.78153	0.117753	1.53407	0.617366	insig
pmd0150	UPLC-MS/MS	C28H44NO9P	LysoPS 22:6 (2n isomer)	Lipids	Glycerol ester	-	9	9	9	33860.1	26078.5	26238.5	1.10465	0.00789991	3191.75	11.6401	up
pmd0149	UPLC-MS/MS	C28H46NO9P	LysoPS 22:5	Lipids	Glycerol ester	-	9	9	9	75627.4	97195.5	57993.4	1.10429	0.0210298	8548.75	13.0615	up
pmd0148	UPLC-MS/MS	C28H46NO9P	LysoPS 22:5 (2n isomer)	Lipids	Glycerol ester	-	9	9	9	80182.3	78965.5	65336.5	1.10477	0.00402107	8314.23	13.0214	up
pmd0147	UPLC-MS/MS	C28H54NO7P	LysoPC 20:2	Lipids	LPC	-	29153.7	24010.3	31820.2	2.97026e+06	3.13094e+06	2.07012e+06	1.10245	0.0146655	96.1509	6.58723	up
pmd0146	UPLC-MS/MS	C28H54NO7P	LysoPC 20:2(2n isomer)	Lipids	LPC	-	26590.5	26021	30851.3	2.97611e+06	2.98246e+06	2.08716e+06	1.10318	0.0123212	96.399	6.59095	up
Lmhp011549	UPLC-MS/MS	C28H56NO7P	LysoPC 20:1	Lipids	LPC	-	21635.4	26428.5	22658.9	1.78517e+06	1.89781e+06	1.16542e+06	1.10166	0.0198314	68.5549	6.09919	up
pmd0143	UPLC-MS/MS	C28H58NO7P	LysoPC 20:0	Lipids	LPC	108341-80-6	13153.1	1640.77	5091.74	156057	158014	101922	1.03652	0.0162459	20.9193	4.38676	up
pmb0475	UPLC-MS/MS	C29H34O18	Gallic acid-4-O-(6'''-feruloyl)sophoroside	Phenolic acids	Phenolic acids	-	239177	272454	245873	9	9	9	1.10481	0.00161583	3.56434e-05	-14.776	down
Qmgp102003	UPLC-MS/MS	C29H41NO4	O-Acetyljervine	Alkaloids	Steroid alkaloids	14788-78-4	30467.8	20300.1	25681.9	3.15683e+06	3.65225e+06	2.13106e+06	1.10113	0.022218	116.941	6.86964	up
pmf0096	UPLC-MS/MS	C2H2O4	Oxalic acid	Organic acids	Organic acids	144-62-7	333081	312762	330057	388194	411329	368313	1.01954	0.0198644	1.19668	0.259033	insig
pmf0512	UPLC-MS/MS	C2H3NO3	Oxamic acid	Amino acids and derivatives	Amino acids and derivatives	471-47-6	361923	502128	394066	238943	159927	197354	1.02355	0.0185806	0.473902	-1.07734	down
mws2124	UPLC-MS/MS	C2H5O6P	2-Phosphoglycolate	Organic acids	Organic acids	13147-57-4	113208	119486	100841	377668	341411	595166	1.06736	0.0533981	3.94035	1.97832	up
mws0236	UPLC-MS/MS	C2H7NO3S	2-Aminoethanesulfonic acid	Organic acids	Organic acids	107-35-7	73116.5	65014.1	63851.6	637738	866344	548339	1.09675	0.0226762	10.1614	3.34503	up
Zmgn000216	UPLC-MS/MS	C2H7O4P	2-Hydroxyethylphosphonic acid	Organic acids	Organic acids	22987-21-9	46950.8	47490.4	32977.1	56953.8	39772.2	62237.4	0.566182	0.280327	1.24757	0.319122	insig
mws0704	UPLC-MS/MS	C2H8NO4P	O-Phosphorylethanolamine	Alkaloids	Alkaloids	1071-23-4	724535	528830	666556	234943	235304	291919	1.07032	0.014733	0.396978	-1.33287	down
pmb3114	UPLC-MS/MS	C30H26O11	Epicatechin-epiafzelechin	Flavonoids	Flavanols	-	43478.8	53070.9	51568.9	35045.2	33403.9	29679.8	1.0297	0.0153146	0.662502	-0.594002	insig
Lmpp003930	UPLC-MS/MS	C30H26O12	Apigenin-7-O-(6''-p-Coumaryl)glucoside	Flavonoids	Flavones	-	378860	345681	391058	81613.6	77659.9	74333.7	1.10285	0.00172291	0.209401	-2.25566	down
Lmmp000897	UPLC-MS/MS	C30H26O14	Gallocatechin-(4α→8)-gallocatechin	Flavonoids	Flavanols	-	992380	818189	1.42211e+06	54890.8	150719	61285	1.06461	0.0284318	0.0825616	-3.59839	down
Hmcp001629	UPLC-MS/MS	C30H32O19	Kaempferol-3-O-(6''-Malonyl)glucoside-7-O-Glucoside	Flavonoids	Flavonols	-	168073	84800.1	220726	16364.4	8298.58	12806	1.06445	0.066261	0.0791154	-3.6599	down
pmb0706	UPLC-MS/MS	C30H32O20	Quercetin-3-O-(6''-O-malonyl)glucosyl-5-O-glucoside	Flavonoids	Flavonols	-	88521.9	121278	232761	5555.15	2984.03	2471.83	1.08212	0.0809932	0.0248802	-5.32886	down
pmb0709	UPLC-MS/MS	C30H32O20	Quercetin-7-O-(6''-malonyl)glucosyl-5-O-glucoside	Flavonoids	Flavonols	-	17666.5	34037.8	87724.3	7159.48	4190.25	10573.9	0.935417	0.204567	0.157239	-2.66897	insig
Rfmb26201	UPLC-MS/MS	C30H38O14	Syringaresinol-4'-O-(6''-acetyl)glucoside	Lignans and Coumarins	Lignans	-	22909	32769.6	22608.4	2950.42	5580.67	1228.64	1.02313	0.0122298	0.124666	-3.00386	down
MWSmce598	UPLC-MS/MS	C30H52O26	Maltopentaose	Others	Saccharides	34620-76-3	479947	424356	438374	412593	408839	226211	0.631607	0.247106	0.780264	-0.357965	insig
Lmdn000248	UPLC-MS/MS	C30H52O26	Verbascose	Others	Saccharides	546-62-3	201618	157319	136200	682767	591715	291650	0.981462	0.0906368	3.16303	1.66131	insig
pmn001370	UPLC-MS/MS	C32H42O16	Pinoresinol-4,4'-O-di-O-glucoside	Lignans and Coumarins	Lignans	63902-38-5	219257	237722	266347	47853.9	31580.3	37365.7	1.09311	0.00204542	0.161476	-2.63061	down
pmp001313	UPLC-MS/MS	C33H38O23	6-Hydroxykaempferol-3,6-O-Diglucoside-7-O-Glucuronic Acid	Flavonoids	Flavonols	-	725488	503343	2.06004e+06	8548.15	22478.7	16885.2	1.07286	0.156332	0.0145679	-6.10106	down
Zmhp002640	UPLC-MS/MS	C33H40O21	6-Hydroxykaempferol-3-O-Rutinoside-6-O-glucoside	Flavonoids	Flavonols	-	126137	170063	334159	12818.3	10677.7	13680.3	1.08002	0.0889928	0.0589763	-4.08372	down
Lmmp002334	UPLC-MS/MS	C33H40O21	Quercetin-3-O-rutinoside-7-O-glucoside	Flavonoids	Flavonols	-	126137	170063	334159	12818.3	10677.7	13680.3	1.08002	0.0889928	0.0589763	-4.08372	down
Lhzp102628	UPLC-MS/MS	C33H52O8	3-Epidiosgenin-3-O-glucoside	Steroids	Steroidal saponins	-	5.53342e+06	8.38142e+06	8.94886e+06	1.53769e+06	2.09295e+06	1.59409e+06	1.07335	0.0280306	0.228516	-2.12963	down
Hmdp003400	UPLC-MS/MS	C33H52O8	Diosgenin-3-O-glucoside (Trillin)	Steroids	Steroidal saponins	14144-06-0	2.51092e+06	2.5318e+06	1.83585e+06	476724	590031	755512	1.07125	0.0108328	0.264919	-1.91637	down
Zjhp082616	UPLC-MS/MS	C33H52O8	Disogenin-Gal	Steroids	Steroidal saponins	-	8.53501e+06	8.15272e+06	8.95133e+06	1.40185e+06	2.05472e+06	1.41307e+06	1.09206	2.65474e-05	0.189931	-2.39646	down
Zjhp082613	UPLC-MS/MS	C33H52O8	Diosgenin-Glc	Steroids	Steroidal saponins	-	4.55889e+06	4.38264e+06	4.87998e+06	799610	1.4846e+06	1.14037e+06	1.07106	0.000246178	0.247772	-2.01292	down
Zjhp082615	UPLC-MS/MS	C33H52O8	iso-Disogenin-Gal	Steroids	Steroidal saponins	-	339466	253211	183179	167552	246235	226950	0.416754	0.441979	0.825845	-0.276057	insig
Zjhp082619	UPLC-MS/MS	C33H52O9	Pennogenin-Glc	Steroids	Steroidal saponins	-	3.73251e+06	3.58086e+06	2.64218e+06	1.70633e+06	2.6103e+06	2.44152e+06	0.83403	0.0750602	0.678831	-0.558875	insig
Zjzp081808	UPLC-MS/MS	C33H52O9	iso-2-Hydroxy diosgenin-Glc	Steroids	Steroidal saponins	-	2.22354e+06	1.94598e+06	1.85492e+06	724946	892223	940822	1.07868	0.00213459	0.424602	-1.23582	down
Zjhp082618	UPLC-MS/MS	C33H52O9	Isochiapagenin-Glc	Steroids	Steroidal saponins	-	178053	173578	195112	121857	149021	88842.6	0.902531	0.0555788	0.657935	-0.603982	insig
pmp001035	UPLC-MS/MS	C33H54O8	Sarsasapogenin-3-O-galactoside (Timosaponin A-I)	Steroids	Steroidal saponins	68422-00-4	80579.5	39109.8	130703	84817	86601.1	177755	0.45206	0.463075	1.3945	0.479749	insig
Zjzp081806	UPLC-MS/MS	C33H54O8	Sarsasapogenin-Glc	Steroids	Steroidal saponins	-	7.08502e+07	9.80219e+07	8.43468e+07	8.62919e+06	1.11695e+07	9.85197e+06	1.09815	0.0103911	0.117095	-3.09425	down
Zjzp081810	UPLC-MS/MS	C33H54O9	2-Hydroxy sarsasapogenin-Glc	Steroids	Steroidal saponins	-	2.264e+07	2.37268e+07	2.01366e+07	3.18123e+06	4.68358e+06	4.43052e+06	1.09247	0.000941884	0.184883	-2.43532	down
Lhzp102631	UPLC-MS/MS	C33H54O9	Rhodeasapogenin-3-O-glucoside	Steroids	Steroidal saponins	-	2.31502e+07	2.40377e+07	2.06636e+07	3.60419e+06	4.78892e+06	4.25483e+06	1.09819	0.00126783	0.186406	-2.42348	down
Lhzp102632	UPLC-MS/MS	C33H54O9	Isorhodeasapogenin-3-O-glucoside	Steroids	Steroidal saponins	-	4.94897e+06	2.63035e+06	2.47421e+06	1.28457e+06	1.9786e+06	1.78183e+06	0.869244	0.165636	0.501814	-0.994776	insig
Lmhp008744	UPLC-MS/MS	C33H56O14	1-α-Linolenoyl-glycerol-2,3-di-O-glucoside	Lipids	Glycerol ester	-	9	9	9	27775.1	27119.8	20778.3	1.10461	0.00773823	2802.71	11.4526	up
Lmyn005812	UPLC-MS/MS	C33H56O14	Gingerglycolipid A	Lipids	Glycerol ester	145937-22-0	9	9	9	655952	780993	380085	1.10408	0.036173	67297.4	16.0383	up
Lmyn006011	UPLC-MS/MS	C33H58O14	Gingerglycolipid B	Lipids	Glycerol ester	88168-90-5	9	9	9	631625	724122	401414	1.10434	0.0257988	65080.1	15.9899	up
Lmyn006221	UPLC-MS/MS	C33H60O14	Gingerglycolipid C	Lipids	Glycerol ester	-	9	9	9	49904.6	79225.8	28343.9	1.10232	0.0706702	5832.38	12.5099	up
pmb0492	UPLC-MS/MS	C34H37N3O6	N',N'',N'''-p-Coumaroyl-cinnamoyl-caffeoyl spermidine	Alkaloids	Phenolamine	-	181141	627570	342429	16731.8	67227.1	44533.3	0.991955	0.118887	0.111622	-3.16331	insig
Lmhp003162	UPLC-MS/MS	C34H42O21	Chrysoeriol-6,8-di-C-glucoside-4'-O-glucoside	Flavonoids	Flavones	-	119318	189379	297652	174596	9	66401.4	0.557644	0.169063	0.397471	-1.33108	insig
Lmsp003790	UPLC-MS/MS	C34H42O21	Isorhamnetin-3-O-sophoroside-7-O-rhamnoside*	Flavonoids	Flavonols	41328-75-0	473026	765521	1.06117e+06	34343.7	97578.2	53804.9	1.05885	0.0518663	0.0807609	-3.6302	down
Hmcp001589	UPLC-MS/MS	C34H42O21	Isorhamnetin-3-O-rutinoside-4'-O-glucoside*	Flavonoids	Flavonols	111393-97-6	559089	798560	1.4582e+06	49336.1	97360.7	67224.6	1.06718	0.0837327	0.0759704	-3.71842	down
Hmcp001489	UPLC-MS/MS	C34H42O22	Isorhamnetin-3-O-(2''-O-glucosyl)galactoside-7-O-glucoside	Flavonoids	Flavonols	-	150713	159230	288941	7265.69	21379	33802	1.02054	0.0535157	0.104272	-3.26158	down
pmp001187	UPLC-MS/MS	C36H36N2O8	1-(Dihydroxyphenyl)-N2,N3-bis(4-hydroxyphenethyl)-(5-8)-dimethoxy-1,2dihydronaphthalene-2,3-dicarboxamide	Alkaloids	Phenolamine	-	1.98542e+06	925587	868468	194911	356402	536465	0.934787	0.123731	0.287812	-1.7968	insig
pmp001254	UPLC-MS/MS	C36H36N2O8	Grossamide	Alkaloids	Phenolamine	80510-06-1	1.07673e+07	4.40228e+06	6.00387e+06	948154	1.96634e+06	4.44881e+06	0.831814	0.12212	0.347761	-1.52383	insig
Zmhp003322	UPLC-MS/MS	C36H36O17	Isovitexin-2''-O-(6'''-p-coumaroyl)glucoside	Flavonoids	Flavones	-	279751	293749	438674	76216.2	60691.7	101193	1.06337	0.0312009	0.235237	-2.08782	down
Lmdp004574	UPLC-MS/MS	C37H38O20	Quercetin-3-O-(2'''-O-feruloyl)sophoroside	Flavonoids	Flavonols	-	25694.7	26921.3	96795.8	4465.11	7061.04	864.707	0.949515	0.190734	0.0829309	-3.59195	insig
Hmdp003064	UPLC-MS/MS	C39H60O15	3,24-Dihydroxy-spirostan-5-en-12-one-3-O-glucosyl(1→4)galactoside (Kingianoside H)	Steroids	Steroidal saponins	1202947-59-8	24131.2	21524.8	57443.1	151479	34251.1	130284	0.748324	0.179883	3.06515	1.61596	insig
Jmyp004233	UPLC-MS/MS	C39H62O13	Spirost-5-en-3-ol-3-O-glucosyl(1→4)galactoside	Steroids	Steroidal saponins	-	8.38294e+06	7.80321e+06	8.81013e+06	972923	1.6974e+06	1.68851e+06	1.08157	6.96679e-05	0.17438	-2.5197	down
Zjhp082626	UPLC-MS/MS	C39H62O13	Yamogenin-Glc-Glc	Steroids	Steroidal saponins	-	8.45579e+06	7.58038e+06	8.43315e+06	1.08156e+06	1.65388e+06	1.69952e+06	1.08894	0.00010446	0.181245	-2.46398	down
Zjhp082629	UPLC-MS/MS	C39H62O13	iso-Disogenin-Gal-Glc	Steroids	Steroidal saponins	-	2.02807e+06	2.39398e+06	2.30461e+06	412704	630999	644798	1.07981	0.000463787	0.251016	-1.99415	down
Zjzp081819	UPLC-MS/MS	C39H62O14	2-Hydroxy diosgenin-Glc-Glc	Steroids	Steroidal saponins	-	782515	973725	883299	136149	117849	200828	1.08535	0.00172927	0.172313	-2.5369	down
Zjzp081818	UPLC-MS/MS	C39H62O14	iso-2-Hydroxy diosgenin-Glc-Glc	Steroids	Steroidal saponins	-	2.1933e+06	1.88127e+06	2.65661e+06	689216	1.08302e+06	912914	1.04125	0.0132477	0.398913	-1.32585	down
Zjxp101206	UPLC-MS/MS	C39H62O14	Spirost-25(27)ene-2,3-diol-3-O-glucosyl(1→2)galactoside	Steroids	Steroidal saponins	-	2.66144e+06	1.70101e+06	2.02402e+06	630340	984636	1.19196e+06	0.970659	0.0315119	0.439512	-1.18602	insig
Zjxp101204	UPLC-MS/MS	C39H62O14	Spirostane-25(27)-en-3,12-diol-3-O-glucosyl(1→2)galactoside (Macrostemonoside S)	Steroids	Steroidal saponins	-	2.52038e+06	1.81837e+06	2.24366e+06	639004	936767	1.02296e+06	1.03771	0.0093998	0.394799	-1.34081	down
Zjzp081815	UPLC-MS/MS	C39H64O13	Sarsasapogenin-3-O-glucosyl(1→2)mannoside (Timosaponin A-IV)	Steroids	Steroidal saponins	942621-71-8	8.52275e+07	1.05977e+08	9.56576e+07	7.99288e+06	9.94909e+06	9.34465e+06	1.10174	0.00445499	0.095121	-3.39409	down
Zjzp081821	UPLC-MS/MS	C39H64O14	3,15-Dihydroxyspirostane-3-O-glucosyl(1→2)galactoside (Anemarrhenasaponin III)	Steroids	Steroidal saponins	163047-23-2	1.6464e+06	1.71641e+06	1.39465e+06	242961	372440	415621	1.07819	0.00141421	0.216717	-2.20612	down
Lsjp211282	UPLC-MS/MS	C39H64O14	Neochlorogenin-3-O-glucosyl(1→6)glucoside (Torvoside N)	Steroids	Steroidal saponins	-	4.08741e+07	3.34237e+07	2.33267e+07	980693	1.52696e+06	1.61867e+06	1.09378	0.0254493	0.0422674	-4.56431	down
pme1974	UPLC-MS/MS	C3H4O3	Pyruvic acid	Organic acids	Organic acids	127-17-3	176682	248721	204228	133940	40312.6	37301	0.915121	0.0274976	0.335996	-1.57349	insig
pme1975	UPLC-MS/MS	C3H4O4	Malonic acid	Organic acids	Organic acids	141-82-2	142773	304784	228142	724424	835664	787180	1.04311	0.00107526	3.47384	1.79653	up
pme3096	UPLC-MS/MS	C3H5NO4	Aminomalonic acid	Organic acids	Organic acids	1068-84-4	309018	319304	283262	1.44866e+06	1.50924e+06	1.50387e+06	1.10355	9.95741e-06	4.89453	2.29117	up
mws2125	UPLC-MS/MS	C3H5O6P	Phosphoenolpyruvate	Organic acids	Organic acids	138-08-9	141294	119947	129256	149133	191970	190769	0.934098	0.061622	1.36204	0.445768	insig
pme2601	UPLC-MS/MS	C3H6O3	3-Hydroxypropanoic acid	Organic acids	Organic acids	503-66-2	64321.4	54092.8	50443	1.49205e+06	1.65105e+06	1.81524e+06	1.10313	0.00334613	29.3641	4.87598	up
Lmgn000188	UPLC-MS/MS	C3H6O3	D-Lactic Acid	Organic acids	Organic acids	10326-41-7	8170.99	1165.92	5367.29	90976.6	84467.2	124757	1.03666	0.0148778	20.416	4.35163	up
mws0267	UPLC-MS/MS	C3H6O4	DL-Glyceric Acid	Organic acids	Organic acids	473-81-4	102841	65965	128357	4.91722e+06	3.97972e+06	3.05996e+06	1.09601	0.0184099	40.2369	5.33045	up
pme1987	UPLC-MS/MS	C3H7NO2	L-Alanine	Amino acids and derivatives	Amino acids and derivatives	56-41-7	8230.39	12447.4	15147.6	15634.2	19380.6	15801	0.770121	0.115733	1.41843	0.504295	insig
ML10198895	UPLC-MS/MS	C3H7NO2	N-Methylglycine	Amino acids and derivatives	Amino acids and derivatives	107-97-1	19760.6	10305.6	27088.4	15452.7	11173.2	21886	0.200134	0.648058	0.848784	-0.236531	insig
pme0010	UPLC-MS/MS	C3H7NO3	L-Serine	Amino acids and derivatives	Amino acids and derivatives	56-45-1	506829	370799	492619	175385	201395	256613	1.03173	0.0141576	0.462247	-1.11326	down
MWS0631	UPLC-MS/MS	C3H7NO5S2	S-Sulfo-L-Cysteine	Amino acids and derivatives	Amino acids and derivatives	1637-71-4	13777.1	4721.21	2533.55	2.1944e+06	2.17068e+06	2.58853e+06	1.0902	0.00340358	330.623	8.36904	up
pme3186	UPLC-MS/MS	C3H7O6P	DL-Glyceraldehyde-3-phosphate	Organic acids	Organic acids	591-59-3	695115	437732	577255	7.75855e+06	4.62463e+06	6.4993e+06	1.08956	0.0237507	11.0417	3.46489	up
Zmzn000078	UPLC-MS/MS	C3H7O6P	Dihydroxyacetone phosphate	Others	Saccharides	1957-04-05	212723	237114	243136	2.48882e+06	1.50657e+06	1.93472e+06	1.09418	0.0254117	8.55749	3.09719	up
mws1598	UPLC-MS/MS	C3H9NO3S	3-Amino-1-propionic sulfonic acid	Organic acids	Organic acids	3687-18-1	28822.6	20540.6	74740.7	2.64651e+06	3.97703e+06	3.41178e+06	1.08745	0.013217	80.8623	6.33739	up
Zjhp082640	UPLC-MS/MS	C45H72O17	Yamogenin-Glc-Glc-Rha	Steroids	Steroidal saponins	-	167165	180972	177026	90356.5	135510	88843.2	0.97751	0.0369497	0.59926	-0.738745	insig
pmp000762	UPLC-MS/MS	C45H72O18	Ruscogenin-1-O-rhamnosyl(1→2)glucosyl(1→2)glucoside	Steroids	Steroidal saponins	-	351086	340949	280083	149993	150717	227809	0.989824	0.0128262	0.543677	-0.879179	insig
Hmdp003423	UPLC-MS/MS	C45H72O18	Spirost-5-en-3-ol-3-O-glucosyl(1→2)glucosyl(l→4)galactoside (Neosibiricoside D)	Steroids	Steroidal saponins	880152-67-0	209042	198143	136162	70114.3	125640	128382	0.824783	0.0709377	0.596554	-0.745276	insig
Qabp005310	UPLC-MS/MS	C45H72O18	Dehydroxy Epiruscogenin-glucose-glucose-glucoside	Steroids	Steroidal saponins	-	223252	287489	160633	56392.6	112674	112022	0.931955	0.0513048	0.418676	-1.25609	insig
Zjzp081828	UPLC-MS/MS	C45H74O18	Furost-20(22)-en-3,26-diol-3-O-glucosyl(1→2)galactoside-26-O-glucoside (Timosaponin B-III,Anemarrhenasaponin IV,Pseudoprototimosaponin A-III)	Steroids	Steroidal saponins	139051-27-7	811839	1.19211e+06	648728	191501	200436	236424	1.06751	0.0515263	0.236878	-2.07779	down
Cmlp005083	UPLC-MS/MS	C45H74O18	Furost-5-ene-3,22,26-triol-3-O-rhamnosyl(1→4)glucoside-26-O-glucoside (Asparasaponin II)	Steroids	Steroidal saponins	-	878317	1.2413e+06	819580	156456	255169	295740	1.05284	0.0219712	0.240665	-2.0549	down
Zjxp101221	UPLC-MS/MS	C45H74O18	Spirost-3-O-glucosyl(1→2)glucosyl(1→4)galactoside	Steroids	Steroidal saponins	-	846103	1.13566e+06	991436	123998	129620	151301	1.09904	0.00888044	0.136189	-2.87631	down
Zjzp081834	UPLC-MS/MS	C45H74O18	iso-Timosaponin C	Steroids	Steroidal saponins	-	799254	1.25875e+06	983201	119348	183795	193849	1.07904	0.0212461	0.163419	-2.61335	down
Zjxp101229	UPLC-MS/MS	C45H74O19	26-O-Glucosyl-furost-20(22)-ene-3,12,26-triol-3-O-glucosyl(1→2)-galactoside	Steroids	Steroidal saponins	-	4.52645e+06	4.73353e+06	4.9041e+06	575698	810035	833018	1.0961	1.59449e-05	0.156646	-2.67442	down
Zjzp081837	UPLC-MS/MS	C45H74O19	26-O-Glucosyl-furost-22(23)-en-3,20,26-triol-3-O-galactosyl-(1→2)-glucoside (Anemarnoside B)	Steroids	Steroidal saponins	-	4.77969e+06	5.48786e+06	4.34441e+06	731556	1.24301e+06	1.07615e+06	1.08016	0.00251646	0.208782	-2.25993	down
Zjxp101228	UPLC-MS/MS	C45H74O19	Furost-20(22)-ene-2,3,26-triol-3-O-glucosyl(1→2)galactoside-26-O-glucoside (Macrostemonoside L)	Steroids	Steroidal saponins	-	112302	102461	160711	61828.9	80805.9	167817	0.41451	0.600268	0.826827	-0.274343	insig
pmp001042	UPLC-MS/MS	C45H74O19	Furost-20(22)-en-2,3,26-triol-3-O-glucosyl(1→2)galactoside-26-O-glucoside (Timosaponin D)	Steroids	Steroidal saponins	-	4.39456e+06	3.50663e+06	3.47455e+06	588497	814295	785347	1.09208	0.00704146	0.192352	-2.37818	down
Qayp008035	UPLC-MS/MS	C45H74O19	Gitogenin-glucose-glucose-glucoside	Steroids	Steroidal saponins	-	112302	102461	160711	61828.9	80805.9	167817	0.41451	0.600268	0.826827	-0.274343	insig
pme2433	UPLC-MS/MS	C4H11NO2	Diethanolamine	Alkaloids	Alkaloids	111-42-2	583545	393083	589001	227600	267455	275611	1.01934	0.0480865	0.492241	-1.02256	down
pme2292	UPLC-MS/MS	C4H12N2	Putrescine	Alkaloids	Alkaloids	110-60-1	1.15979e+06	715739	881633	201693	516487	204721	0.956414	0.0230075	0.334728	-1.57894	insig
pme0257	UPLC-MS/MS	C4H4N2O2	Uracil	Nucleotides and derivatives	Nucleotides and derivatives	66-22-8	4.95964e+06	5.92574e+06	5.12763e+06	5.59206e+06	5.69296e+06	4.75443e+06	0.0121513	0.9843	1.00165	0.00238063	insig
MWS2027	UPLC-MS/MS	C4H4N2O3	Barbituric acid;Malonylurea;2,4,6-Pyrimidinetrione	Nucleotides and derivatives	Nucleotides and derivatives	67-52-7	1.33635e+07	1.59733e+07	1.4681e+07	1.06092e+07	9.03299e+06	1.11369e+07	1.00602	0.011696	0.699243	-0.516134	insig
mws1167	UPLC-MS/MS	C4H4O5	Oxalacetic acid	Organic acids	Organic acids	328-42-7	6477.98	16903	33269.2	133973	98919.1	123457	0.997892	0.00207139	6.29033	2.65314	insig
mws0255	UPLC-MS/MS	C4H5N3O	Cytosine	Nucleotides and derivatives	Nucleotides and derivatives	71-30-7	3.59381e+06	6.13326e+06	5.22236e+06	1.90006e+07	1.85563e+07	2.06031e+07	1.07566	0.000145093	3.89045	1.95994	up
MWS5173	UPLC-MS/MS	C4H5N3O	Isocytosine	Nucleotides and derivatives	Nucleotides and derivatives	108-53-2	1.15737e+06	603740	643350	318244	518166	380282	0.877506	0.14644	0.506015	-0.982747	insig
Lmbn000121	UPLC-MS/MS	C4H6N2O2	3-Cyano-L-alanine	Amino acids and derivatives	Amino acids and derivatives	6232-19-5	25217.8	26109.3	27040	44878.9	40599.9	24231.4	0.686409	0.238097	1.39995	0.485378	insig
Lmgn000219	UPLC-MS/MS	C4H6O3	Succinic semialdehyde	Organic acids	Organic acids	692-29-5	34636.8	24054.7	31250.1	150575	118290	127317	1.08864	0.004937	4.40488	2.1391	up
pme1730	UPLC-MS/MS	C4H6O4	D-Erythronolactone	Organic acids	Organic acids	15667-21-7	1.12911e+06	1.18591e+06	1.17699e+06	592766	597188	510552	1.09262	0.000186543	0.486971	-1.03809	down
mws0470	UPLC-MS/MS	C4H6O4	Methylmalonic acid	Organic acids	Organic acids	516-05-2	9.62636e+06	8.99869e+06	8.61433e+06	4.07597e+07	3.96258e+07	4.33544e+07	1.10311	0.000593687	4.54268	2.18354	up
pme2923	UPLC-MS/MS	C4H6O4	Acetoxyacetic acid	Organic acids	Organic acids	13831-30-6	10891.6	10371.2	6345.03	445861	426897	462067	1.10052	0.000433357	48.3495	5.59543	up
Lmbn000198	UPLC-MS/MS	C4H6O5	3-Dehydro-L-Threonic Acid	Others	Saccharides	-	15617212	1.47454e+07	1.15621e+07	1.6811e+07	1.95835e+07	1.84503e+07	0.886135	0.0516682	1.30817	0.387555	insig
mws0275	UPLC-MS/MS	C4H6O5	L-Malic acid	Organic acids	Organic acids	97-67-6	1.12659e+06	897866	1.13515e+06	1.89162e+06	1.29641e+06	892905	0.471094	0.402307	1.2916	0.369158	insig
mws0262	UPLC-MS/MS	C4H6O6	L-Tartaric acid	Organic acids	Organic acids	87-69-4	203646	142128	58444.5	632881	550767	1.24021e+06	0.993894	0.0853728	5.9964	2.5841	insig
pme1936	UPLC-MS/MS	C4H7N3O	Creatinine	Organic acids	Organic acids	60-27-5	774336	787742	828386	753567	790493	743750	0.689601	0.189558	0.957057	-0.0633229	insig
mws4052	UPLC-MS/MS	C4H7NO2	1-Aminocyclopropane-1-carboxylic acid	Organic acids	Organic acids	22059-21-8	667422	605386	567081	142720	73507	314152	0.949186	0.0152094	0.288267	-1.79452	insig
Jmyp000635	UPLC-MS/MS	C4H7NO2	L-Azetidine-2-carboxylic acid	Alkaloids	Alkaloids	2133-34-8	1.86845e+06	2.0019e+06	2.21326e+06	338103	312842	1.74633e+06	0.82797	0.116288	0.394055	-1.34353	insig
pme3193	UPLC-MS/MS	C4H7NO3	N-Acetyl-L-glycine	Amino acids and derivatives	Amino acids and derivatives	543-24-8	30011.3	9204.48	36985.8	84493.5	164051	149252	0.970477	0.0369409	5.22032	2.38414	insig
MWSmce609	UPLC-MS/MS	C4H7NO4	L-Aspartic acid	Amino acids and derivatives	Amino acids and derivatives	56-84-8	3.77302e+06	2.7561e+06	2.90755e+06	1.98682e+06	2.93964e+06	2.7949e+06	0.607535	0.258222	0.81823	-0.289422	insig
MWS1882	UPLC-MS/MS	C4H7NO4	Iminodiacetic acid	Organic acids	Organic acids	142-73-4	980438	681257	1.16265e+06	1.09967e+06	1.61376e+06	1.14634e+06	0.692995	0.186932	1.36661	0.450603	insig
Lmgn000160	UPLC-MS/MS	C4H8N2O3	3-Ureidopropionic Acid	Organic acids	Organic acids	462-88-4	666894	769102	998792	890039	1.71857e+06	283070	0.0555229	0.752652	1.18765	0.24811	insig
mws0001	UPLC-MS/MS	C4H8N2O3	L-Asparagine	Amino acids and derivatives	Amino acids and derivatives	70-47-3	1.02501e+07	8.21397e+06	6.23412e+06	3.34913e+06	8.15639e+06	2.42193e+06	0.731164	0.177399	0.563906	-0.826474	insig
mws0206	UPLC-MS/MS	C4H8O3	2-Hydroxybutyric Acid	Organic acids	Organic acids	3347-90-8	16546.2	11755.8	1833.96	253943	188639	181111	1.02238	0.0112566	20.696	4.37128	up
mws0576	UPLC-MS/MS	C4H8O3	3-Hydroxybutyric acid	Organic acids	Organic acids	300-85-6	295924	202876	391683	646000	858998	714984	1.01021	0.00629022	2.49301	1.31789	up
pma0134	UPLC-MS/MS	C4H8O4	D-Threose	Others	Saccharides	95-43-2	204397	157520	262377	179453	219683	192668	0.123567	0.764401	0.947957	-0.0771061	insig
mws0889	UPLC-MS/MS	C4H8O5	D-Threonic Acid	Others	Saccharides	3909-12-04	722176	533944	834244	2.12036e+07	1.91193e+07	1.62479e+07	1.1003	0.0060502	27.0627	4.75823	up
Zmpn000638	UPLC-MS/MS	C4H9N3O2	3-Guanidinopropionic acid	Organic acids	Organic acids	353-09-3	100254	22034.1	82102.3	2.04712e+06	1.96648e+06	1.89271e+06	1.06715	3.67643e-05	28.8972	4.85286	up
ML10197929	UPLC-MS/MS	C4H9N3O2	Creatine	Organic acids	Organic acids	57-00-1	15241.3	54203.7	58809.1	832908	1.02817e+06	1.23559e+06	1.06592	0.0126033	24.1448	4.59364	up
pme3017	UPLC-MS/MS	C4H9NO2	2-Aminoisobutyric acid	Organic acids	Organic acids	62-57-7	1.20882e+07	1.35377e+07	1.08923e+07	1.61805e+07	1.4834e+07	1.85665e+07	0.949665	0.0362537	1.35771	0.441173	insig
MWSmce585	UPLC-MS/MS	C4H9NO2	Methyl 3-aminopropanoate	Amino acids and derivatives	Amino acids and derivatives	4138-35-6	1.17795e+07	1.29392e+07	1.2052e+07	1.69294e+07	1.55432e+07	1.72489e+07	1.0629	0.00384291	1.3522	0.435312	insig
pme3033	UPLC-MS/MS	C4H9NO2	N,N-Dimethylglycine	Amino acids and derivatives	Amino acids and derivatives	1118-68-9	1.22754e+07	1.38549e+07	1.04103e+07	1.70762e+07	1.56592e+07	1.61194e+07	0.954519	0.0387722	1.337	0.418998	insig
pme3011	UPLC-MS/MS	C4H9NO2	γ-Aminobutyric acid	Organic acids	Organic acids	56-12-2	731178	619726	751549	601852	555334	706843	0.606858	0.261202	0.886597	-0.173649	insig
pme0057	UPLC-MS/MS	C4H9NO2S	L-Homocysteine	Amino acids and derivatives	Amino acids and derivatives	6027-13-0	358093	384540	405331	625472	509996	577556	1.04358	0.0186477	1.49223	0.577467	insig
Zmdp000972	UPLC-MS/MS	C4H9NO2S	S-Methyl-L-cysteine	Amino acids and derivatives	Amino acids and derivatives	1187-84-4	1.59327e+07	1.61487e+07	2.18569e+07	1.47407e+07	1.37193e+07	1.52094e+07	0.754946	0.215632	0.809618	-0.304687	insig
mws0230	UPLC-MS/MS	C4H9NO3	L-Threonine	Amino acids and derivatives	Amino acids and derivatives	72-19-5	1.17439e+08	1.30196e+08	4.91764e+07	3.21305e+06	4.29622e+06	3.76532e+06	1.08328	0.0632527	0.0379858	-4.7184	down
Zmzn000079	UPLC-MS/MS	C4H9O7P	D-Erythrose-4-phosphate	Others	Saccharides	585-18-2	145975	189229	302057	78320.3	73926.3	471746	0.309278	0.97713	0.97918	-0.0303539	insig
Zjzp081850	UPLC-MS/MS	C50H82O22	Sarsasapogenin-Glc-Glc-Glc-Xyl	Steroids	Steroidal saponins	-	178125	300437	277735	39015.4	55799.8	14995	1.01927	0.0210929	0.145195	-2.78394	down
Jmyp004138	UPLC-MS/MS	C51H82O23	Furost-5-ene-3,14,22,26-tetrol-3-O-glucosyl(1→2)[xylosyl(1→3)]glucosyl(1→4)galactoside-26-O-glucoside (Polygonatumoside F)	Steroids	Steroidal saponins	-	92154.9	205972	106263	64954.1	102684	60388.9	0.738989	0.237295	0.563879	-0.826542	insig
Zjhp082688	UPLC-MS/MS	C51H82O23	Spirost-5-en-3-ol-3-O-glucosyl(1→2)[glucosyl(1→3)]glucosyl(1→4)galactoside	Steroids	Steroidal saponins	-	263124	146857	270279	172811	253430	126019	0.387101	0.478667	0.811837	-0.300739	insig
Zjzp081862	UPLC-MS/MS	C51H82O23	Diosgenin-Glc-Glc-Glc-Glc	Steroids	Steroidal saponins	-	130972	193608	172037	65024.3	111217	94138.5	0.93423	0.0337376	0.544444	-0.877146	insig
Lhlp102627	UPLC-MS/MS	C51H84O23	Furost-3,22-diol-12-one-26-carboxylic acid-3-O-glucosyl-(1→4)-[O-glucosyl-(1→2)-O-glucosyl-(1→4)-O-galactoside(iso-01)	Steroids	Steroidal saponins	-	928903	1.66087e+06	1.10408e+06	312952	388902	444663	1.04386	0.057524	0.310385	-1.68787	down
Lsjp211291	UPLC-MS/MS	C51H84O23	Furost-5-en-3,22,26-triol-3-O-rhamnosyl(1→2)[glucosyl(1→3)]galactoside-26-O-glucoside (Indioside D)	Steroids	Steroidal saponins	-	122816	95283.1	145399	32144.4	26531.5	35321.3	1.07888	0.0222497	0.258591	-1.95126	down
zjbp120105	UPLC-MS/MS	C51H84O23	Tigogenin-3-O-galactosyl(1→2)[xylosyl(1→3)]glucosyl(1→4)galactoside (Desglucolanatigonin II)	Steroids	Steroidal saponins	-	1.55002e+06	2.12657e+06	1.26036e+06	470640	571754	518780	1.06212	0.0459241	0.316222	-1.66099	down
Zjxp101233	UPLC-MS/MS	C51H84O23	Tigogenin-3-O-glucosyl(1→2)[glucosyl(1→3)]glucosyl(1→4)galactoside (Macrostemonoside A)	Steroids	Steroidal saponins	143049-26-7	835815	1.54366e+06	957923	342720	382778	487814	1.01485	0.0782508	0.36355	-1.45977	down
Qmfp090711	UPLC-MS/MS	C51H84O23	Neotigogenin-glucose-glucose-glucose-glucoside	Steroids	Steroidal saponins	-	1.12903e+06	1.20345e+06	958715	349457	398127	448515	1.08477	0.00497416	0.363424	-1.46027	down
Zjzp081868	UPLC-MS/MS	C51H84O24	2,3-Dihydroxy-20-ene-26-furostanol-Glc-Glc-Glc-Glc	Steroids	Steroidal saponins	-	113180	107681	72529.5	4984.94	24155.7	28578.7	0.940418	0.0109906	0.196732	-2.3457	insig
Zjzp081867	UPLC-MS/MS	C51H84O24	Hydroxy sarsasapogenin-Glc-Glc-Glc-Glc	Steroids	Steroidal saponins	-	7.82866e+06	7.44721e+06	6.05895e+06	2.82119e+06	3.02734e+06	3.2775e+06	1.08103	0.0130732	0.427753	-1.22515	down
Xmdn002724	UPLC-MS/MS	C53H86O24	Tigogenin-3-O-glucosyl(1→2)[glucosyl(1→3)(6-O-acetyl-glucosyl)](1→4)galactoside (Macrostemonoside D)	Steroids	Steroidal saponins	143049-27-8	5084.89	6170.42	5869.83	34784	58854.5	76533.8	1.07998	0.0518117	9.93699	3.31281	up
Zjzp081871	UPLC-MS/MS	C56H90O27	Diosgenin-Glc-Glc-Glc-Glc-Xyl	Steroids	Steroidal saponins	-	738813	774870	953156	176171	339931	328709	1.02308	0.00364565	0.342467	-1.54596	down
Zjzp081873	UPLC-MS/MS	C56H92O27	Sarsasapogenin-Glc-Glc-Glc-Glc-Xyl	Steroids	Steroidal saponins	-	5.95477e+06	8.174e+06	6.42288e+06	971330	1.37133e+06	915018	1.08899	0.0107819	0.158512	-2.65734	down
Qayp004206	UPLC-MS/MS	C56H92O28	Gitogenin-glucose-glucose-glucose-arabinose-glucoside	Steroids	Steroidal saponins	-	616266	1.05159e+06	611225	181873	188013	179457	1.06943	0.0584695	0.241038	-2.05267	down
pmp001043	UPLC-MS/MS	C56H92O28	Anemarrhenasaponin H1	Steroids	Steroidal saponins	-	582602	1.34299e+06	716906	154526	233703	163215	1.03555	0.0952211	0.208683	-2.26062	down
Jmyn004445	UPLC-MS/MS	C56H92O29	Furost-5-ene-3,22,26-triol-3-O-glucosyl(1→2)[xylosyl(1→3)]glucosyl(1→4)galactoside-26-O-glucoside (Timosaponin H1)	Steroids	Steroidal saponins	-	717299	917737	1.04842e+06	381730	199888	251975	1.03632	0.0099721	0.310642	-1.68668	down
Zjzp081882	UPLC-MS/MS	C57H92O28	Diosgenin-Glc-Glc-Glc-Glc-Glc	Steroids	Steroidal saponins	-	338728	471234	305792	47348.5	75965.1	84079.4	1.07005	0.0225026	0.185877	-2.42758	down
Zjzp081884	UPLC-MS/MS	C57H92O29	2-Hydroxy diosgenin-Glc-Glc-Glc-Glc-Glc	Steroids	Steroidal saponins	-	8348.8	50401.6	25698.1	54269.9	98155.4	80757	0.820434	0.0485098	2.76124	1.46531	insig
Lhlp102618	UPLC-MS/MS	C57H92O29	Hydroxydiosgenin pentaglucoside	Steroids	Steroidal saponins	-	62194.9	76762.2	153169	110554	197643	237176	0.744073	0.151307	1.86691	0.900655	insig
Zjzp081883	UPLC-MS/MS	C57H94O28	Sarsasapogenin-Glc-Glc-Glc-Glc-Glc	Steroids	Steroidal saponins	-	8.14749e+06	1.4607e+07	1.29418e+07	1.35816e+06	1.45702e+06	1.75006e+06	1.08569	0.0326898	0.127891	-2.96701	down
Zjxp101242	UPLC-MS/MS	C57H94O28	Furost-20(22)-ene-3,26-diol-3-O-glucosyl(1→2)[glucosyl(1→3)]glucosyl(1→4)galactoside-26-O-glucoside (Macrostemonoside E)(iso-1)	Steroids	Steroidal saponins	-	7.56344e+06	1.71803e+07	1.37839e+07	1.47047e+06	1.42708e+06	1.72531e+06	1.07361	0.0566856	0.119988	-3.05904	down
Zjzp081885	UPLC-MS/MS	C57H94O29	2,3-Dihydroxy-20-ene-26-furostanol-Glc-Glc-Glc-Glc-Glc	Steroids	Steroidal saponins	-	9	9	9	96118.7	146627	130169	1.10439	0.0140165	13811.7	13.7536	up
Zjxp101245	UPLC-MS/MS	C57H94O29	26-O-Glucosyl-furost-25(27)-ene-3,22,26-triol-3-O-glucosyl(1→2)[glucosyl(1→3)]-glucosyl(1→4)-galactoside	Steroids	Steroidal saponins	-	1.60535e+06	2.2434e+06	1.75149e+06	197309	361119	322981	1.07831	0.0108597	0.157388	-2.6676	down
Qayp004148	UPLC-MS/MS	C57H94O29	Gitogenin-glucose-glucose-glucose-glucose-glucoside	Steroids	Steroidal saponins	-	29188.6	51937.4	50951.3	6297.73	14050.9	6049	1.02521	0.0304738	0.199865	-2.3229	down
pme0193	UPLC-MS/MS	C5H10N2O3	L-Glutamine	Amino acids and derivatives	Amino acids and derivatives	56-85-9	3.27222e+06	2.2883e+06	3.12515e+06	998933	1.43391e+06	781421	1.02098	0.0113782	0.370066	-1.43415	down
mws0875	UPLC-MS/MS	C5H10N2O3S	L-Cysteinyl-L-glycine	Amino acids and derivatives	Amino acids and derivatives	19246-18-5	2.52468e+06	6.9545e+06	5.18663e+06	58838.8	71790	44120.3	1.09217	0.0642604	0.0119154	-6.39103	down
mws0147	UPLC-MS/MS	C5H10O3	β-Hydroxyisovaleric acid	Organic acids	Organic acids	625-08-1	416885	439559	195442	480533	704514	467792	0.713407	0.141122	1.57131	0.651969	insig
mws1499	UPLC-MS/MS	C5H10O5	D-Arabinose	Others	Saccharides	10323-20-3	354139	99121	200691	698851	929546	1.12812e+06	0.984301	0.0136958	4.21518	2.07559	insig
Zmgn000173	UPLC-MS/MS	C5H10O5	D-Ribose	Others	Saccharides	50-69-1	21281.1	28486.6	30389	293704	240344	231047	1.09751	0.00638088	9.54498	3.25474	up
MWSmce199	UPLC-MS/MS	C5H10O5	L-Xylose	Others	Saccharides	609-06-3	519877	390698	533047	1.51318e+06	2.22022e+06	2.02728e+06	1.07829	0.0172667	3.99044	1.99655	up
mws0344	UPLC-MS/MS	C5H10O6	D-Xylonic acid	Others	Saccharides	526-91-0	277939	189646	435716	1.62553e+06	1.63904e+06	1.89047e+06	1.06552	0.000271831	5.70688	2.5127	up
pmb0782	UPLC-MS/MS	C5H11N	Piperidine	Alkaloids	Piperidine alkaloids	110-89-4	5.21381e+06	5.16955e+06	5.89305e+06	8.43858e+06	6.99856e+06	6.83461e+06	0.986113	0.0419147	1.36835	0.452432	insig
mws0567	UPLC-MS/MS	C5H11N3O2	4-Guanidinobutyric acid	Organic acids	Organic acids	463-00-3	296276	395963	288556	3.76128e+06	5.63336e+06	3.08248e+06	1.09075	0.0371693	12.7214	3.66919	up
mws0256	UPLC-MS/MS	C5H11NO2	L-Valine	Amino acids and derivatives	Amino acids and derivatives	72-18-4	3.13353e+06	3.32118e+06	3.74545e+06	3.99543e+06	3.56692e+06	3.9453e+06	0.764882	0.13167	1.12818	0.174	insig
MWS5209	UPLC-MS/MS	C5H11NO2	N-Methyl-α-aminoisobutyric acid	Amino acids and derivatives	Amino acids and derivatives	2566-34-9	2.89391e+06	1.9495e+06	1.0745e+06	4.62442e+06	1.18948e+07	3.34215e+06	0.846767	0.219889	3.35615	1.74681	insig
mws0224	UPLC-MS/MS	C5H11NO2S	DL-Methionine	Amino acids and derivatives	Amino acids and derivatives	59-51-8	6.101e+06	5.95182e+06	9.13752e+06	3.43982e+06	1.55018e+06	1.69399e+06	0.995276	0.0240898	0.315426	-1.66462	insig
pme1210	UPLC-MS/MS	C5H11NO2S	L-Methionine	Amino acids and derivatives	Amino acids and derivatives	63-68-3	5.94343e+06	5.20615e+06	7.25964e+06	2.9798e+06	1.33897e+06	1.50048e+06	1.00898	0.00653607	0.316105	-1.66152	down
pme2617	UPLC-MS/MS	C5H11NO3S	L-Methionine Sulfoxide	Amino acids and derivatives	Amino acids and derivatives	3226-65-1	665486	706503	706034	601471	643229	351114	0.67374	0.218108	0.767949	-0.380918	insig
pmb2507	UPLC-MS/MS	C5H11O7P	2-Deoxyribose-1-phosphate	Nucleotides and derivatives	Nucleotides and derivatives	17210-42-3	217486	160105	123044	179260	228248	199270	0.568155	0.335736	1.21201	0.277407	insig
pma6455	UPLC-MS/MS	C5H11O8P	Ribulose-5-phosphate	Others	Saccharides	4300-28-1	248054	172198	124129	1.61727e+06	1.24687e+06	1.53114e+06	1.08302	0.00413531	8.07389	3.01326	up
pme2527	UPLC-MS/MS	C5H12N2O2	L-Ornithine	Amino acids and derivatives	Amino acids and derivatives	70-26-8	1.62766e+06	1.36766e+06	3.84294e+06	1.94307e+06	3.48947e+06	1.40059e+06	0.0462726	0.998727	0.99925	-0.00108262	insig
mws0437	UPLC-MS/MS	C5H12O5	D-Arabitol	Others	Saccharides	488-82-4	36540.2	46086.1	54723.3	46483.5	67377.6	54629.7	0.600135	0.26729	1.22673	0.294816	insig
pme0513	UPLC-MS/MS	C5H12O5	Xylitol	Others	Saccharides	87-99-0	25854.4	31618.4	49570.8	41499.5	52283.3	37636.8	0.525807	0.397413	1.22772	0.295981	insig
pme1841	UPLC-MS/MS	C5H14N2	Cadaverine	Alkaloids	Alkaloids	462-94-2	200618	109815	165271	49208.4	32514	169712	0.702569	0.228176	0.528551	-0.919884	insig
pmb0501	UPLC-MS/MS	C5H14N4	Agmatine	Alkaloids	Alkaloids	306-60-5	429626	499031	438006	2.5501e+06	3.50493e+06	1.56642e+06	1.06265	0.0648754	5.57668	2.47941	up
pmb0484	UPLC-MS/MS	C5H14NO+	Choline	Alkaloids	Alkaloids	62-49-7	399749	561151	438191	643996	586371	598034	0.880525	0.0852112	1.30685	0.386093	insig
pmb1754	UPLC-MS/MS	C5H15NO4P+	O-Phosphocholine	Alkaloids	Alkaloids	107-73-3	9.049e+06	7.08557e+06	8.61939e+06	1.06502e+06	1.11051e+06	1.41302e+06	1.09732	0.00573415	0.144969	-2.78618	down
MWSslk102	UPLC-MS/MS	C5H3ClN4	6-Chloropurine	Nucleotides and derivatives	Nucleotides and derivatives	87-42-3	1.60241e+06	1.60344e+06	1.54562e+06	4.5392e+06	4.77723e+06	4.89142e+06	1.10355	0.000773172	2.9902	1.58024	up
pme2165	UPLC-MS/MS	C5H4N2O4	Orotic acid (Vitamin B13)	Others	Vitamin	65-86-1	2.31212e+06	2.79481e+06	2.32703e+06	2.32781e+06	2.38629e+06	2.67671e+06	0.0290831	0.944255	0.994196	-0.00839789	insig
pme0033	UPLC-MS/MS	C5H4N4O	Hypoxanthine	Nucleotides and derivatives	Nucleotides and derivatives	68-94-0	763617	611333	780643	1.73987e+06	1.78128e+06	2.18941e+06	1.07871	0.0077727	2.64918	1.40555	up
pme0256	UPLC-MS/MS	C5H4N4O2	Xanthine	Nucleotides and derivatives	Nucleotides and derivatives	69-89-6	7630.98	16281.1	2236.92	235304	142499	239460	1.04231	0.0233028	23.6056	4.56106	up
Lmxp000939	UPLC-MS/MS	C5H5N5	Zarzissine	Alkaloids	Alkaloids	160568-14-9	1.68921e+07	1.77769e+07	2.25332e+07	3.2105e+07	3.18776e+07	2.83406e+07	1.02528	0.00744425	1.61398	0.690624	insig
pmb0374	UPLC-MS/MS	C5H5N5	2-Aminopurine	Nucleotides and derivatives	Nucleotides and derivatives	452-06-2	102380	900177	45076.7	8.85909e+06	9.15201e+06	7.59329e+06	1.00733	0.000467586	24.4402	4.61119	up
pme0040	UPLC-MS/MS	C5H5N5	Adenine	Nucleotides and derivatives	Nucleotides and derivatives	73-24-5	252662	178502	261021	2.45846e+06	2.54381e+06	1.93668e+06	1.09597	0.00732077	10.0247	3.32549	up
pme1109	UPLC-MS/MS	C5H5N5O	Guanine	Nucleotides and derivatives	Nucleotides and derivatives	73-40-5	5.25696e+06	112208	4.04406e+06	5.42184e+06	6.32295e+06	2.3389e+06	0.460562	0.475323	1.49616	0.581264	insig
pma6298	UPLC-MS/MS	C5H5NO	3-Hydroxypyridine	Alkaloids	Pyridine alkaloids	109-00-2	9	9	9	3.29238e+06	2.71636e+06	3.27545e+06	1.10479	0.00371869	343859	18.3915	up
MWSmce448	UPLC-MS/MS	C5H6N2O2	Imidazol-1-yl-acetic acid	Alkaloids	Alkaloids	22884-10-2	5.27369e+06	4.29089e+06	3.80922e+06	1.15353e+07	1.0407e+07	1.1051e+07	1.07959	0.000397883	2.46701	1.30277	up
mws0251	UPLC-MS/MS	C5H6N2O2	Thymine	Nucleotides and derivatives	Nucleotides and derivatives	65-71-4	182954	415887	144756	1.14577e+06	1.20719e+06	1.72023e+06	1.03093	0.0136326	5.47768	2.45357	up
pme2879	UPLC-MS/MS	C5H6N2O3	5-Hydroxymethyluracil	Nucleotides and derivatives	Nucleotides and derivatives	4433-40-3	37874.5	33504.2	25414.5	141899	151827	159896	1.09127	0.000105294	4.68651	2.22851	up
Zmgn000217	UPLC-MS/MS	C5H6O4	Methylenesuccinic acid	Organic acids	Organic acids	97-65-4	723109	817921	787790	726311	694653	629985	0.830905	0.0806191	0.880681	-0.183308	insig
pme2380	UPLC-MS/MS	C5H6O5	α-Ketoglutaric acid	Organic acids	Organic acids	328-50-7	204562	171501	119486	522930	485346	795632	1.04506	0.0397858	3.64022	1.86403	up
pme2761	UPLC-MS/MS	C5H6O6	4-Hydroxy-2-oxoglutaric acid	Organic acids	Organic acids	1187-99-1	406795	213704	665765	2.51523e+06	2.66839e+06	3.21654e+06	1.04511	0.00160888	6.53066	2.70723	up
mws0572	UPLC-MS/MS	C5H7N3O	5-Methylcytosine	Nucleotides and derivatives	Nucleotides and derivatives	554-01-8	218297	315711	407698	2.0227e+06	1.79142e+06	1.8711e+06	1.08292	7.44351e-05	6.03714	2.59386	up
mws0263	UPLC-MS/MS	C5H7NO3	5-Oxo-L-Proline	Amino acids and derivatives	Amino acids and derivatives	98-79-3	55134.6	58013.4	49323.8	1.61495e+06	1.43127e+06	1.21504e+06	1.10315	0.00705754	26.2277	4.71302	up
mws4516	UPLC-MS/MS	C5H7NO3	Pyroglutamic acid	Amino acids and derivatives	Amino acids and derivatives	4042-36-8	479924	531767	432560	3.46642e+06	3.69122e+06	3.75687e+06	1.10256	0.000262949	7.55721	2.91785	up
pme0152	UPLC-MS/MS	C5H8N2O2	5,6-Dihydro-5-methyluracil	Nucleotides and derivatives	Nucleotides and derivatives	696-04-8	455146	571206	654908	287060	200109	17435.9	0.76545	0.019377	0.300135	-1.73632	insig
MWSmce706	UPLC-MS/MS	C5H8N2O2	Cyclo(Ala-Gly)	Amino acids and derivatives	Amino acids and derivatives	4526-77-6	7.87466e+06	7.16202e+06	6.87406e+06	5.05495e+06	5.02731e+06	5.25441e+06	1.07448	0.0139852	0.699961	-0.514653	insig
pme2935	UPLC-MS/MS	C5H8O3	2-Oxovaleric acid	Organic acids	Organic acids	1821-02-9	6813.18	4528.77	6654.67	31106.3	34692.5	36833.9	1.09057	0.000940966	5.70289	2.51169	up
mws0823	UPLC-MS/MS	C5H8O3	3-Methyl-2-Oxobutanoic acid	Organic acids	Organic acids	759-05-7	244849	173181	90881.5	431514	425932	588241	0.965478	0.0115895	2.84074	1.50627	insig
pme0275	UPLC-MS/MS	C5H8O3	4-Oxopentanoic Acid	Organic acids	Organic acids	123-76-2	13202.3	1919.79	3375.55	158352	158321	215191	1.05355	0.0100619	28.7531	4.84565	up
mws0473	UPLC-MS/MS	C5H8O4	2-Methylsuccinic acid	Organic acids	Organic acids	498-21-5	47824.7	50855.7	46243.1	2.21466e+06	1.86865e+06	1.79239e+06	1.10416	0.00459064	40.5435	5.3414	up
Lmbn001288	UPLC-MS/MS	C5H8O4	2-Hydroxy-2-methyl-3-oxobutanoic acid	Organic acids	Organic acids	71698-08-3	150524	151885	141018	6.91939e+06	5.93636e+06	5.81007e+06	1.10438	0.00331308	42.0944	5.39556	up
MWSmce362	UPLC-MS/MS	C5H8O4	3-Ethoxy-3-oxopropanoic acid	Organic acids	Organic acids	1071-46-1	71208.4	50669.5	100300	26010.9	80407.9	41916.2	0.582814	0.319525	0.667641	-0.582856	insig
pme3034	UPLC-MS/MS	C5H8O4	Ethylmalonic acid	Organic acids	Organic acids	601-75-2	180173	164846	143705	7.81725e+06	6.81964e+06	7.0796e+06	1.104	0.00175825	44.435	5.47363	up
pmb2826	UPLC-MS/MS	C5H8O5	L-Citramalic acid	Organic acids	Organic acids	6236-09-05	4.96331e+06	5.57604e+06	5.08157e+06	4.25123e+06	4.02284e+06	3.75187e+06	1.02927	0.00848228	0.769862	-0.377328	insig
Zmyn000230	UPLC-MS/MS	C5H8O5	2-Dehydro-3-deoxy-L-arabinonate	Others	Saccharides	-	2.20236e+06	2.39659e+06	2.22933e+06	2.32526e+06	2.031e+06	1.82028e+06	0.626244	0.274468	0.904552	-0.144725	insig
MWS3036	UPLC-MS/MS	C5H8O5	3-Hydroxyglutaric acid	Organic acids	Organic acids	638-18-6	2.41162e+06	2.03049e+06	2.5773e+06	2.18414e+06	2.0127e+06	1.70725e+06	0.715711	0.158429	0.841111	-0.249632	insig
ML10171848	UPLC-MS/MS	C5H8O5	D-Arabinono-1,4-lactone	Others	Saccharides	2782-09-04	167607	358250	191846	4.06395e+06	4.03961e+06	3.1128e+06	1.08783	0.00635869	15.6281	3.96607	up
pme2122	UPLC-MS/MS	C5H9N3	Histamine	Alkaloids	Alkaloids	51-45-6	2.83426e+06	3.49694e+06	3.72266e+06	1.33117e+07	1.26408e+07	1.43649e+07	1.09549	0.000355935	4.01014	2.00365	up
pme0006	UPLC-MS/MS	C5H9NO2	L-Proline	Amino acids and derivatives	Amino acids and derivatives	147-85-3	3.27728e+06	3.69168e+06	3.75807e+06	2.28443e+06	2.46601e+06	2.0999e+06	1.0632	0.00321029	0.638605	-0.647004	insig
mws0712	UPLC-MS/MS	C5H9NO3	N-Propionylglycine	Amino acids and derivatives	Amino acids and derivatives	21709-90-0	740967	806051	679010	663463	559617	560235	0.914017	0.0429999	0.80112	-0.31991	insig
mws0216	UPLC-MS/MS	C5H9NO3	Trans-4-Hydroxy-L-proline	Amino acids and derivatives	Amino acids and derivatives	51-35-4	1.6621e+07	1.14146e+07	2.2709e+07	3.23406e+07	2.78607e+07	2.46853e+07	0.871275	0.0522188	1.67282	0.742284	insig
pme0014	UPLC-MS/MS	C5H9NO4	L-Glutamic acid	Amino acids and derivatives	Amino acids and derivatives	56-86-0	9.74133e+07	8.29103e+07	9.68598e+07	1.6688e+07	1.67849e+07	2.36127e+07	1.09159	0.000980342	0.205949	-2.27964	down
Zmzn000113	UPLC-MS/MS	C5H9NO4	L-threo-3-Methylaspartate	Amino acids and derivatives	Amino acids and derivatives	6061-13-8	5.63893e+06	5.41194e+06	1.01984e+07	1.80494e+06	1.6786e+06	1.7052e+06	1.05794	0.0752601	0.244184	-2.03396	down
mws1050	UPLC-MS/MS	C5H9NO4	O-Acetylserine	Amino acids and derivatives	Amino acids and derivatives	5147-00-2	300168	64924.5	294172	2.37622e+06	2.96862e+06	2.21981e+06	1.02922	0.00530558	11.4744	3.52035	up
pme2758	UPLC-MS/MS	C5H9NO5	4-Hydroxy-L-glutamic acid	Amino acids and derivatives	Amino acids and derivatives	3913-68-6	326894	361850	477225	369146	325253	246373	0.603729	0.268004	0.806858	-0.309613	insig
MWS4471	UPLC-MS/MS	C6H10N2O4	N-Alpha-Acetyl-L-Asparagine	Amino acids and derivatives	Amino acids and derivatives	4033-40-3	3.97635e+06	4.2349e+06	3.93642e+06	2.02691e+06	2.78253e+06	1.27563e+06	0.940157	0.0382333	0.500925	-0.997334	insig
mws0373	UPLC-MS/MS	C6H10O3	4-Methyl-2-oxovalerate	Organic acids	Organic acids	816-66-0	3849.23	1001.67	820.721	29893.2	22546.1	19594.6	1.03981	0.0123195	12.7008	3.66684	up
Wmzn000227	UPLC-MS/MS	C6H10O4	2,2-Dimethylsuccinic acid	Organic acids	Organic acids	597-43-3	168860	126462	331788	8330.13	7978.69	1718.93	1.05093	0.0831452	0.0287474	-5.12043	down
mws0924	UPLC-MS/MS	C6H10O4	2-Methylglutaric acid	Organic acids	Organic acids	617-62-9	189477	191491	158157	1.89492e+06	2.08139e+06	1.61794e+06	1.10127	0.00606403	10.3765	3.37525	up
Lmbn001676	UPLC-MS/MS	C6H10O4	3-Hydroxy-3-Methyl-2-Oxopentanoic Acid	Organic acids	Organic acids	-	106864	111962	63804.4	75326.9	98484.7	144092	0.230649	0.668281	1.1248	0.169674	insig
MWS0559	UPLC-MS/MS	C6H10O5	1,6-anhydro-β-D-glucose	Others	Saccharides	498-07-7	196700	194273	283112	1.77719e+06	1.69615e+06	1.60087e+06	1.09632	9.17374e-05	7.52756	2.91218	up
pme2914	UPLC-MS/MS	C6H10O5	3-Hydroxy-3-methylpentane-1,5-dioic acid	Amino acids and derivatives	Amino acids and derivatives	503-49-1	809669	741609	816469	1.09435e+06	1.24449e+06	1.0191e+06	1.03274	0.0269677	1.4182	0.50406	insig
pme1021	UPLC-MS/MS	C6H10O6	D-Glucono-1,5-lactone	Others	Saccharides	90-80-2	54885.2	93404.1	114137	2.0139e+06	2.26719e+06	1.52022e+06	1.09122	0.0133934	22.1064	4.46639	up
mws1189	UPLC-MS/MS	C6H10O7	D-Galacturonic acid	Others	Saccharides	685-73-4	363225	343922	559180	2.90147e+06	2.818e+06	4.15836e+06	1.08456	0.019934	7.80038	2.96354	up
pme3705	UPLC-MS/MS	C6H10O7	D-Glucoronic acid	Others	Saccharides	6556-12-03	380605	393705	557005	2.82889e+06	2.62803e+06	3.9346e+06	1.08735	0.0204252	7.05432	2.81851	up
Zmpn000199	UPLC-MS/MS	C6H10O8	D-Galactaric acid	Others	Saccharides	526-99-8	735847	581041	746908	506284	590303	615470	0.746568	0.150043	0.829568	-0.269569	insig
Zmyn000108	UPLC-MS/MS	C6H10O8	D-Saccharic acid	Others	Saccharides	87-73-0	696585	631923	674306	450449	652078	640614	0.580336	0.315511	0.870346	-0.20034	insig
mws0982	UPLC-MS/MS	C6H11N3	1-Methylhistamine	Alkaloids	Alkaloids	501-75-7	49445.9	65345.4	52193	927812	705680	1.19119e+06	1.09637	0.0240663	16.9158	4.0803	up
pma2987	UPLC-MS/MS	C6H11N3O	Histidinol	Alkaloids	Alkaloids	501-28-0	2.51492e+07	1.69864e+07	1.73422e+07	2.03593e+07	1.50695e+07	1.48509e+07	0.48775	0.401201	0.845353	-0.242375	insig
MWS0811	UPLC-MS/MS	C6H11NO2	L-Pipecolic Acid	Organic acids	Organic acids	3105-95-1	568379	526570	483686	3.80986e+06	3.7298e+06	3.90117e+06	1.10354	1.34361e-05	7.2473	2.85744	up
MWS04447	UPLC-MS/MS	C6H11NO2	Homoproline	Amino acids and derivatives	Amino acids and derivatives	56879-46-0	107515	163454	74341.9	2.74083e+06	3.6015e+06	2.34127e+06	1.09119	0.0170462	25.1472	4.65233	up
ML10181668	UPLC-MS/MS	C6H11NO2	Cycloleucine	Amino acids and derivatives	Amino acids and derivatives	52-52-8	1.87074e+06	1.49066e+06	1.73621e+06	9.26354e+06	9.20069e+06	9.27777e+06	1.10143	0.000120294	5.44216	2.44418	up
Zmdp002020	UPLC-MS/MS	C6H11NO2S	S-1-Propenyl-L-cysteine	Amino acids and derivatives	Amino acids and derivatives	52438-09-2	2.06021e+07	2.10872e+07	1.98938e+07	718667	706027	569672	1.10361	0.000240028	0.0323849	-4.94853	down
mws1550	UPLC-MS/MS	C6H11NO2S	S-Allyl-L-cysteine	Amino acids and derivatives	Amino acids and derivatives	21593-77-1	126361	153656	234222	3.3437e+06	2.96276e+06	2.27066e+06	1.09253	0.0126844	16.6792	4.05998	up
Lmqp000427	UPLC-MS/MS	C6H11NO3	N-Methyl-Trans-4-Hydroxy-L-Proline	Amino acids and derivatives	Amino acids and derivatives	4252-82-8	570337	551763	589647	507281	653944	802036	0.449028	0.42867	1.14693	0.197782	insig
pme3351	UPLC-MS/MS	C6H11NO3	Allysine(6-Oxo DL-Norleucine)	Amino acids and derivatives	Amino acids and derivatives	1962-83-0	27414.8	24005.4	27148.1	126374	85473.1	76989.4	1.07389	0.0435617	3.67625	1.87824	up
Zmdp000441	UPLC-MS/MS	C6H11NO3S	3-(Allylsulphinyl)-L-alanine	Amino acids and derivatives	Amino acids and derivatives	17795-26-5	3.98493e+07	4.23528e+07	5.11085e+07	3.06162e+06	4.2238e+06	6.29699e+06	1.0859	0.00458015	0.101885	-3.29498	down
pmb0468	UPLC-MS/MS	C6H11NO3S	N-Formyl-L-Methionine	Amino acids and derivatives	Amino acids and derivatives	4289-98-9	14555.1	6592.09	17584.3	1.75196e+06	1.69439e+06	1.52318e+06	1.09659	0.00170712	128.307	7.00346	up
pme3382	UPLC-MS/MS	C6H11NO4	N-Acetyl-L-threonine	Amino acids and derivatives	Amino acids and derivatives	17093-74-2	14727	20794	16103.1	163812	147269	187768	1.09812	0.0052585	9.66309	3.27248	up
MWS201054	UPLC-MS/MS	C6H11NO4	O-Acetyl-L-homoserine	Amino acids and derivatives	Amino acids and derivatives	250736-84-6	9	9	9	9.30014e+06	7.65911e+06	6.64954e+06	1.10478	0.00949562	874400	19.7379	up
pmb3081	UPLC-MS/MS	C6H11PO11	Glucarate O-Phosphoric acid	Others	Saccharides	-	211051	48362.3	217521	366554	350833	435067	0.808389	0.0380673	2.41638	1.27285	insig
MWS0611	UPLC-MS/MS	C6H12N2O3	D-Alanyl-D-Alanine	Amino acids and derivatives	Amino acids and derivatives	923-16-0	2890.3	4187.37	14714.2	30197.7	23807.2	27168.4	0.932398	0.0189303	3.72494	1.89722	insig
mws0221	UPLC-MS/MS	C6H12N2O4S2	L-Cystine	Amino acids and derivatives	Amino acids and derivatives	56-89-3	412053	441327	499375	603366	783418	1.02307e+06	0.952761	0.0954245	1.78144	0.833045	insig
mws0341	UPLC-MS/MS	C6H12O3	2-Hydroxyisocaproic acid	Organic acids	Organic acids	20312-37-2	225293	106770	24600.7	1.16445e+06	1.1872e+06	1.08352e+06	0.989144	0.000508137	9.63141	3.26775	insig
mws0972	UPLC-MS/MS	C6H12O3	6-Hydroxyhexanoic acid	Organic acids	Organic acids	1191-25-9	202170	212016	233518	124736	119926	122732	1.09178	0.00851139	0.567226	-0.818003	insig
pme3154	UPLC-MS/MS	C6H12O4	Mevalonic acid	Organic acids	Organic acids	150-97-0	9	9	9	7.82723e+06	9.37821e+06	7.89523e+06	1.1048	0.00363807	929655	19.8263	up
pme2529	UPLC-MS/MS	C6H12O5	1,5-Anhydro-D-glucitol	Others	Saccharides	154-58-5	110218	87042	164900	1.53882e+06	1.69466e+06	1.85275e+06	1.09317	0.00202009	14.0441	3.81189	up
mws1595	UPLC-MS/MS	C6H12O5	D-Fucose	Others	Saccharides	3615-37-0	5051.42	2136.48	14164.4	65282.2	86065.8	70276.7	1.01753	0.00205832	10.3794	3.37565	up
pmf0139	UPLC-MS/MS	C6H12O6	D-Galactose	Others	Saccharides	59-23-4	2.6448e+06	2.53736e+06	3.11529e+06	4.69919e+07	4.60972e+07	2.24565e+07	1.08508	0.0469059	13.9254	3.79965	up
mws1164	UPLC-MS/MS	C6H12O6	D-Fructose	Others	Saccharides	57-48-7	2.73293e+06	2.95158e+06	3.29559e+06	4.55695e+07	4.60012e+07	2.49884e+07	1.09046	0.035346	12.9797	3.69819	up
mws4170	UPLC-MS/MS	C6H12O6	D-Glucose	Others	Saccharides	50-99-7	3.77801e+06	3.59225e+06	5.28e+06	6.85728e+07	7.01693e+07	3.91644e+07	1.08919	0.0315829	14.0635	3.81388	up
pmf0138	UPLC-MS/MS	C6H12O6	D-Mannose	Others	Saccharides	3458-28-4	3.36251e+06	3.37138e+06	5.12188e+06	6.03856e+07	6.00333e+07	3.41698e+07	1.08696	0.0312227	13.0391	3.70477	up
Hmln000297	UPLC-MS/MS	C6H12O6	Inositol	Others	Saccharides	87-89-8	4.08124e+06	3.66614e+06	4.90485e+06	6.98872e+07	7.0293e+07	3.60223e+07	1.08722	0.0406347	13.9266	3.79977	up
Zamn00402	UPLC-MS/MS	C6H12O6	sorbose	Others	Saccharides	7270-77-1	2.60773e+06	3.22218e+06	3.09505e+06	4.64488e+07	4.52337e+07	2.52393e+07	1.09056	0.0345191	13.1005	3.71155	up
pme0534	UPLC-MS/MS	C6H12O7	Gluconic acid	Others	Saccharides	526-95-4	2.87741e+06	2.56279e+06	4.65623e+06	3.30575e+07	3.84133e+07	3.51667e+07	1.09127	0.000614376	10.5619	3.4008	up
Zmdp000917	UPLC-MS/MS	C6H13N3O2	δ-Guanidinovaleric acid	Organic acids	Organic acids	462-93-1	2.97375e+06	2.70225e+06	2.96663e+06	2.54524e+06	2.96154e+06	2.45551e+06	0.597956	0.291377	0.921282	-0.118286	insig
pme0008	UPLC-MS/MS	C6H13N3O3	L-Citrulline	Amino acids and derivatives	Amino acids and derivatives	372-75-8	1.26217e+07	1.2889e+07	1.11917e+07	5.37877e+06	8.26163e+06	3.42726e+06	0.936708	0.0307898	0.465028	-1.10461	insig
pme0274	UPLC-MS/MS	C6H13NO2	6-Aminocaproic acid	Organic acids	Organic acids	60-32-2	2.29519e+07	2.63267e+07	2.86973e+07	3.89818e+07	3.59512e+07	3.55091e+07	1.024	0.00845194	1.41636	0.502191	insig
pmp001198	UPLC-MS/MS	C6H13NO2	6-Deoxyfagomine	Alkaloids	Piperidine alkaloids	197449-09-5	5.19098e+06	5.30745e+06	5.34324e+06	8.2975e+06	7.09322e+06	7.78549e+06	1.07347	0.0183583	1.46299	0.54892	insig
pme2679	UPLC-MS/MS	C6H13NO2	L-Allo-isoleucine	Amino acids and derivatives	Amino acids and derivatives	1509-34-8	9.83949e+06	6.96355e+06	4.17171e+06	1.20243e+07	1.13006e+07	1.06496e+07	0.80937	0.110636	1.61978	0.6958	insig
mws0227	UPLC-MS/MS	C6H13NO2	L-Leucine*	Amino acids and derivatives	Amino acids and derivatives	61-90-5	2.15874e+06	2.12806e+06	2.66352e+06	2.45232e+06	2.0934e+06	2.18515e+06	0.18138	0.74172	0.968426	-0.046287	insig
mws1587	UPLC-MS/MS	C6H13NO2	L-Norleucine*	Amino acids and derivatives	Amino acids and derivatives	327-57-1	1.62391e+06	2.31944e+06	2.15749e+06	3.6369e+06	2.95783e+06	3.51094e+06	0.991154	0.0107483	1.65644	0.728084	insig
Lmbp000123	UPLC-MS/MS	C6H13NO2S	L-Homomethionine	Amino acids and derivatives	Amino acids and derivatives	25148-30-5	1.28228e+06	745089	917743	77075.5	20755.4	36601	1.06959	0.0262875	0.0456458	-4.45338	down
MWSmce190	UPLC-MS/MS	C6H13NO3	4-Hydroxy-L-Isoleucine	Amino acids and derivatives	Amino acids and derivatives	781658-23-9	643874	575628	696976	737633	608376	711651	0.441758	0.42407	1.07367	0.102547	insig
MWS2442	UPLC-MS/MS	C6H13O9P	D-Fructose 6-Phosphate	Others	Saccharides	643-13-0	3.82086e+06	121418	6.50342e+06	8.79964e+07	7.54655e+07	1.72443e+08	0.949216	0.0700335	32.1572	5.00707	insig
mws0866	UPLC-MS/MS	C6H13O9P	D-Glucose 6-phosphate	Others	Saccharides	56-73-5	64391.2	9	238721	2.6176e+06	3.05801e+06	6.87639e+06	0.791259	0.0939961	41.4092	5.37188	insig
mws1090	UPLC-MS/MS	C6H13O9P	Glucose-1-phosphate	Others	Saccharides	59-56-3	92121.2	95797.1	184304	3.55175e+06	2.61273e+06	7.59369e+06	1.07891	0.0999393	36.9622	5.20798	up
pme0026	UPLC-MS/MS	C6H14N2O2	L-Lysine	Amino acids and derivatives	Amino acids and derivatives	56-87-1	3.43016e+06	2.39618e+06	3.08566e+06	989224	1.41853e+06	790282	1.03071	0.00991519	0.358846	-1.47856	down
mws0260	UPLC-MS/MS	C6H14N4O2	L-Arginine	Amino acids and derivatives	Amino acids and derivatives	74-79-3	2.59606e+06	2.34862e+06	2.56675e+06	1.0759e+06	1.7116e+06	510889	0.880825	0.0498765	0.439116	-1.18733	insig
Zmyn000110	UPLC-MS/MS	C6H14NO8P	D-Glucosamine 1-phosphate	Others	Saccharides	2152-75-2	118178	97728.1	297368	778501	700953	1.01458e+06	1.01596	0.00652931	4.85908	2.28068	up
pme3311	UPLC-MS/MS	C6H14O12P2	D-Fructose-1,6-biphosphate	Others	Saccharides	488-69-7	961642	1.5221e+06	1.74472e+06	6.7435e+06	3.39242e+06	5.22809e+06	1.01875	0.0549078	3.63347	1.86135	up
Zmyn000083	UPLC-MS/MS	C6H14O12P2	D-Glucose 1,6-bisphosphate	Others	Saccharides	10139-18-1	163905	107304	100905	218463	160190	164665	0.811839	0.106092	1.46008	0.546049	insig
MWSmce165	UPLC-MS/MS	C6H14O5	L-Fucitol	Others	Saccharides	13074-06-1	2.01771e+06	1.69928e+06	2.91744e+06	1.74324e+07	1.68036e+07	1.94566e+07	1.09138	0.000577851	8.09302	3.01668	up
mws1155	UPLC-MS/MS	C6H14O6	D-Mannitol	Others	Saccharides	69-65-8	128511	221059	222783	110654	84573.5	72813	0.950471	0.0691209	0.468314	-1.09445	insig
mws0214	UPLC-MS/MS	C6H14O6	D-Sorbitol	Others	Saccharides	50-70-4	525440	773958	987447	541313	334582	393124	0.860435	0.110045	0.554922	-0.849644	insig
MWSslk235	UPLC-MS/MS	C6H14O6	Allitol	Others	Saccharides	488-44-8	689889	987232	1.25879e+06	1.0765e+06	897434	602524	0.279942	0.607338	0.877569	-0.188416	insig
Zmpn000095	UPLC-MS/MS	C6H15O9P	Sorbitol-6-phosphate	Others	Saccharides	20479-58-7	104824	67016.8	59835.5	654613	473495	469362	1.08203	0.0139612	6.89527	2.78561	up
Lmsn015919	UPLC-MS/MS	C6H18O24P6	Phytic acid	Organic acids	Organic acids	83-86-3	77647.4	77404.8	73654.1	63770.7	65065.2	68848.4	1.02948	0.00711221	0.864359	-0.210298	insig
mws1641	UPLC-MS/MS	C6H4N4O2	Lumazine	Nucleotides and derivatives	Nucleotides and derivatives	487-21-8	28408.5	7648.26	15487.3	554641	578348	322310	1.07322	0.0285795	28.2341	4.81937	up
pme1216	UPLC-MS/MS	C6H5NO2	2-Picolinic acid	Organic acids	Organic acids	98-98-6	7025.63	1466.63	6047.47	416013	425542	427360	1.08039	2.65724e-06	87.2721	6.44745	up
pme0490	UPLC-MS/MS	C6H5NO2	Nicotinic acid (Vitamin B3)	Others	Vitamin	59-67-6	875975	808400	1.10614e+06	1.75564e+07	1.41459e+07	1.75608e+07	1.10108	0.00512415	17.6537	4.1419	up
MWSmce039	UPLC-MS/MS	C6H5NO2	Isonicotinic acid	Others	Vitamin	55-22-1	129437	108793	96947	348021	442536	542928	1.0776	0.0247498	3.97846	1.99221	up
pme2828	UPLC-MS/MS	C6H5NO3	4-Nitrophenol	Phenolic acids	Phenolic acids	100-02-7	1.13252e+08	1.1122e+08	1.07957e+08	9.09263e+07	9.0536e+07	9.89877e+07	1.03434	0.0105315	0.843639	-0.245302	insig
pme1137	UPLC-MS/MS	C6H5NO3	6-Hydroxynicotinic acid	Alkaloids	Pyridine alkaloids	5006-66-6	48990.9	57067.5	56984.3	7.24517e+06	8.19592e+06	1.05756e+07	1.1034	0.0129525	159.57	7.31804	up
Lsjp211240	UPLC-MS/MS	C6H6N2O	Nicotinamide	Others	Vitamin	98-92-0	1.24563e+06	1.14816e+06	1.15021e+06	3.27315e+07	3.8882e+07	3.29236e+07	1.10408	0.00357043	29.4969	4.88249	up
pme0166	UPLC-MS/MS	C6H6N4O2	1-Methylxanthine	Nucleotides and derivatives	Nucleotides and derivatives	6136-37-4	27144	63911.2	38250.6	98550.6	72963.6	125476	0.914815	0.0454482	2.2968	1.19963	insig
pme1266	UPLC-MS/MS	C6H6N4O2	3-Methylxanthine	Nucleotides and derivatives	Nucleotides and derivatives	1076-22-8	35265.8	21600.8	65089.2	49295.1	59924.5	32964.5	0.326423	0.681748	1.16587	0.221403	insig
pme2801	UPLC-MS/MS	C6H6N4O2	7-Methylxanthine	Nucleotides and derivatives	Nucleotides and derivatives	552-62-5	31797.2	121288	159739	247546	235100	187725	0.759951	0.0692517	2.14297	1.09961	insig
pmc0274	UPLC-MS/MS	C6H6N4S	6-Methylmercaptopurine	Nucleotides and derivatives	Nucleotides and derivatives	50-66-8	26312.6	28965.5	15552.2	51697.8	37960.5	34040.4	0.864659	0.0632828	1.74641	0.804391	insig
mws1358	UPLC-MS/MS	C6H6O2	Pyrocatechol	Phenolic acids	Phenolic acids	120-80-9	3587.1	6248.99	11885.1	127376	146170	163675	1.07711	0.00397954	20.1288	4.33119	up
NK10264324	UPLC-MS/MS	C6H6O3	Phloroglucinol; 1,3,5-Benzenetriol	Phenolic acids	Phenolic acids	108-73-6	9	9	9	9.16541e+06	7.65312e+06	2.53351e+07	1.10317	0.131052	1.56125e+06	20.5743	up
MWSmce536	UPLC-MS/MS	C6H6O3	Methyl 2-furoate	Organic acids	Organic acids	611-13-2	12183.6	6744.8	11394.8	186771	147352	205102	1.09325	0.00939887	17.7826	4.1524	up
pmp000509	UPLC-MS/MS	C6H6O3	Maltol	Others	Ketone compounds	118-71-8	957267	1.08536e+06	762571	4.81528e+06	4.67348e+06	4.74013e+06	1.09615	8.8236e-05	5.07232	2.34265	up
MWSCX001	UPLC-MS/MS	C6H6O4	5-hydroxymaltol	Others	Ketone compounds	1073-96-7	185673	89312.5	170943	7.09581e+06	7.2998e+06	7.6669e+06	1.09721	0.000373466	49.4755	5.62864	up
MWS3017	UPLC-MS/MS	C6H6O4	5-Hydroxymethyl-2-furancarboxylic acid	Organic acids	Organic acids	6338-41-6	16936.2	6848.96	21448.1	2.8762e+06	3.38532e+06	2.2607e+06	1.09455	0.0129708	188.406	7.5577	up
pme3207	UPLC-MS/MS	C6H6O4	Muconic acid	Organic acids	Organic acids	1119-72-8	2.85236e+07	2.94399e+07	2.85828e+07	2.91001e+07	3.09829e+07	2.90936e+07	0.592382	0.300584	1.03039	0.0431929	insig
pmf0244	UPLC-MS/MS	C6H6O4	Kojic acid	Organic acids	Organic acids	501-30-4	32539.4	27936.3	17541.8	174097	196764	312240	1.07464	0.0408608	8.75573	3.13023	up
pme3009	UPLC-MS/MS	C6H6O6	Trans-Citridic acid	Organic acids	Organic acids	4023-65-8	695400	714287	732597	763043	670338	914155	0.458508	0.437754	1.09581	0.131998	insig
pme2550	UPLC-MS/MS	C6H6O6	Cis-Aconitic acid	Organic acids	Organic acids	585-84-2	1.84176e+06	1.90669e+06	1.62058e+06	2.31296e+06	2.14228e+06	2.03182e+06	0.926316	0.0353818	1.20824	0.272903	insig
mws0847	UPLC-MS/MS	C6H7N5	1-Methyladenine	Nucleotides and derivatives	Nucleotides and derivatives	5142-22-3	259814	252707	325650	356008	362781	297519	0.764306	0.129947	1.21253	0.27802	insig
MWS4525	UPLC-MS/MS	C6H7N5O	6-O-methylguanine	Nucleotides and derivatives	Nucleotides and derivatives	20535-83-5	936521	996334	1.30779e+06	883930	728425	1.24083e+06	0.393158	0.537307	0.880437	-0.183708	insig
Zasp001145	UPLC-MS/MS	C6H7NO	4-Aminophenol	Alkaloids	Phenolamine	123-30-8	31632.4	53149.8	27192.5	788888	711921	660277	1.0944	0.00207751	19.2998	4.27051	up
MWSslk042	UPLC-MS/MS	C6H7NO2	N-Ethylmaleimide (NEM)	Amino acids and derivatives	Amino acids and derivatives	128-53-0	12688.5	17117.4	56241.1	2.49011e+06	2.22927e+06	2.47978e+06	1.084	0.001003	83.6655	6.38656	up
MWS1798	UPLC-MS/MS	C6H8O2	2,4-Hexadienoic acid	Organic acids	Organic acids	110-44-1	117084	106412	58666	72445.2	164740	112242	0.330445	0.529679	1.23839	0.308469	insig
mws4175	UPLC-MS/MS	C6H8O6	D-Glucurono-6,3-lactone	Others	Saccharides	32449-92-6	115218	131528	114196	558646	573397	605035	1.1024	0.000178511	4.81262	2.26682	up
Hmfn000531	UPLC-MS/MS	C6H8O6	L-Ascorbic acid (Vitamin C)	Others	Vitamin	50-81-7	7.08663e+06	6.63881e+06	7.39461e+06	652663	914348	364155	1.07859	4.03688e-05	0.0914376	-3.45107	down
MWSmce690	UPLC-MS/MS	C6H8O6	Erythorbic Acid; Isoascorbic Acid	Others	Vitamin	89-65-6	525445	510882	573353	9	9	9	1.10482	0.00123467	1.67735e-05	-15.8635	down
mws0281	UPLC-MS/MS	C6H8O7	Citric Acid	Organic acids	Organic acids	77-92-9	1.34835e+07	1.57983e+07	1.38058e+07	1.28748e+07	1.05951e+07	1.10722e+07	0.907024	0.0469579	0.801671	-0.318917	insig
Zmyn000453	UPLC-MS/MS	C6H8O7	Isocitric Acid	Organic acids	Organic acids	320-77-4	1.21705e+07	1.436e+07	1.24976e+07	1.07409e+07	9.83383e+06	8.72615e+06	0.9668	0.0233899	0.750763	-0.41357	insig
mws0254	UPLC-MS/MS	C6H9N3O2	L-Histidine	Amino acids and derivatives	Amino acids and derivatives	71-00-1	2.80981e+07	1.8351e+07	3.24468e+07	2.81468e+06	4.77345e+06	2.01209e+06	1.06265	0.0272755	0.121682	-3.03881	down
pme2559	UPLC-MS/MS	C6H9NO5	N-Acetyl-L-Aspartic Acid	Amino acids and derivatives	Amino acids and derivatives	997-55-7	9	9	9	269231	344971	238726	1.10462	0.0121175	31590	14.9472	up
pmb0764	UPLC-MS/MS	C6H9NOS	4-Methyl-5-thiazoleethanol	Others	Others	137-00-8	14573.2	32093.8	40361.1	375782	343901	233856	1.06485	0.0188897	10.9567	3.45374	up
MWS0933	UPLC-MS/MS	C7H11N3O2	1-Methylhistidine	Amino acids and derivatives	Amino acids and derivatives	332-80-9	581335	213234	134629	2.57461e+06	2.45349e+06	2.28342e+06	1.03158	0.000558605	7.86862	2.97611	up
pme2867	UPLC-MS/MS	C7H11NO3	3-Methylcrotonyl-L-glycine	Amino acids and derivatives	Amino acids and derivatives	33008-07-0	47604.7	86894.9	26226.9	78493.3	116173	134561	0.802978	0.0818135	2.04837	1.03448	insig
pme0075	UPLC-MS/MS	C7H11NO5	N-Acetyl-L-glutamic acid	Amino acids and derivatives	Amino acids and derivatives	1188-37-0	71241.4	101568	55247.3	359848	356286	346403	1.07795	0.00117033	4.6591	2.22005	up
pme0124	UPLC-MS/MS	C7H12N2O3	L-Glycyl-L-proline	Amino acids and derivatives	Amino acids and derivatives	704-15-4	560176	904693	834619	447014	342475	476746	0.942286	0.0668886	0.55066	-0.860767	insig
pme0137	UPLC-MS/MS	C7H12N2O4	N-Acetyl-L-Glutamine	Amino acids and derivatives	Amino acids and derivatives	2490-97-3	257789	291212	242884	1.7175e+06	1.79133e+06	2.26682e+06	1.09884	0.0101719	7.29354	2.86662	up
Zmgn001448	UPLC-MS/MS	C7H12O5	2-Propylmalic Acid	Organic acids	Organic acids	-	2.13262e+06	2.09793e+06	2.35954e+06	1.16479e+06	1.19252e+06	1.39173e+06	1.07592	0.00104281	0.568891	-0.813777	insig
pmb3101	UPLC-MS/MS	C7H12O5	2-Isopropylmalic Acid	Organic acids	Organic acids	49601-06-1	2.5784e+06	2.50696e+06	2.8365e+06	1.38265e+06	1.49326e+06	1.67648e+06	1.07452	0.00115207	0.574662	-0.799214	insig
mws0277	UPLC-MS/MS	C7H12O6	Quinic Acid	Organic acids	Organic acids	77-95-2	3.32718e+06	4.21496e+06	3.55383e+06	3.74154e+06	2.78427e+06	2.5727e+06	0.672622	0.216819	0.819984	-0.286333	insig
Zajp000573	UPLC-MS/MS	C7H13NO2	N-(4-oxopentyl)-acetamide	Alkaloids	Alkaloids	-	1.29186e+07	1.13697e+07	1.27991e+07	1.27583e+07	1.17865e+07	1.09057e+07	0.383014	0.496891	0.955863	-0.0651239	insig
Hmsp000364	UPLC-MS/MS	C7H13NO2	L-Cyclopentylglycine	Amino acids and derivatives	Amino acids and derivatives	2521-84-8	1.07942e+06	1.12341e+06	791940	2.36095e+06	2.60116e+06	1.80456e+06	1.03304	0.0201424	2.25949	1.176	up
Lmbn001467	UPLC-MS/MS	C7H13NO3	5-Acetamidopentanoic Acid	Organic acids	Organic acids	1072-10-2	103931	94906.7	88933.7	97785	169676	75977.8	0.269085	0.580863	1.19344	0.255129	insig
Zmdp000976	UPLC-MS/MS	C7H13NO4S	S-(2-Carboxypropyl)cysteine	Amino acids and derivatives	Amino acids and derivatives	6852-42-2	1.67606e+07	2.42915e+07	1.53904e+07	4.16307e+06	3.77351e+06	3.42548e+06	1.08504	0.0316336	0.201303	-2.31256	down
Zmyn000155	UPLC-MS/MS	C7H14N2O3	N-α-Acetyl-L-ornithine	Amino acids and derivatives	Amino acids and derivatives	6205-08-09	2.06854e+07	2.07083e+07	1.95441e+07	9.27823e+06	1.23459e+07	5.42149e+06	0.963726	0.0264908	0.443823	-1.17194	insig
MWS1903	UPLC-MS/MS	C7H14N2O3	Glycyl-L-valine	Amino acids and derivatives	Amino acids and derivatives	1963-21-9	9	9	9	13028.6	36275.6	12167	1.10008	0.122026	2276.71	11.1527	up
pme0278	UPLC-MS/MS	C7H14N2O4	2,6-Diaminooimelic acid	Organic acids	Organic acids	583-93-7	336186	233843	319613	655818	1.00939e+06	1.15514e+06	1.0385	0.0438718	3.17021	1.66458	up
mws2104	UPLC-MS/MS	C7H14O6	D-Pinitol	Others	Saccharides	10284-63-6	184988	222049	1.27997e+06	7.21284e+06	7.63352e+06	7.64199e+06	1.0213	0.00083277	13.3303	3.73664	up
Hmcn000192	UPLC-MS/MS	C7H14O7	Sedoheptulose	Others	Saccharides	3019-74-7	522157	418817	449228	394273	401098	431867	0.719116	0.211418	0.882777	-0.179879	insig
mws0193	UPLC-MS/MS	C7H15N3O3	L-Homocitrulline	Amino acids and derivatives	Amino acids and derivatives	1190-49-4	9	9	9	1.73163e+06	1.67137e+06	1.85357e+06	1.10482	0.00093409	194688	17.5708	up
Lmcp000282	UPLC-MS/MS	C7H15NO3	L-Carnitine	Alkaloids	Alkaloids	541-15-1	210646	443920	241464	4.38049e+06	4.66054e+06	4.29733e+06	1.08972	2.12658e-05	14.8861	3.89589	up
pme3163	UPLC-MS/MS	C7H15O10P	D-Sedoheptuiose 7-phosphate	Others	Saccharides	2646-35-7	25815	32258.8	70548.4	288440	234256	259587	1.04999	0.000518045	6.08202	2.60455	up
Zmjp000182	UPLC-MS/MS	C7H16N4O2	N-Monomethyl-L-arginine	Amino acids and derivatives	Amino acids and derivatives	17035-90-4	3.90278e+07	3.46139e+07	2.71945e+07	2.14199e+07	2.96567e+07	1.60278e+07	0.792695	0.100452	0.665479	-0.587534	insig
pme3388	UPLC-MS/MS	C7H16N4O2	Homoarginine	Amino acids and derivatives	Amino acids and derivatives	156-86-5	1.05538e+07	9.51939e+06	6.94607e+06	5.40723e+06	7.16317e+06	4.43456e+06	0.860718	0.0721562	0.629365	-0.668031	insig
Zmdp000292	UPLC-MS/MS	C7H16N4O2	Arginine methyl ester	Amino acids and derivatives	Amino acids and derivatives	-	4.0172e+07	3.63263e+07	2.74499e+07	2.21221e+07	2.97141e+07	1.56456e+07	0.795754	0.0937559	0.649187	-0.623295	insig
mws0017	UPLC-MS/MS	C7H19N3	Spermidine	Alkaloids	Alkaloids	124-20-9	8.42516e+06	3.75784e+06	4.02092e+06	500668	546561	564268	1.07596	0.0847078	0.099451	-3.32987	down
mws5028	UPLC-MS/MS	C7H5NO2	2-Benzoxazolinone	Alkaloids	Alkaloids	59-49-4	53653.1	62791.8	50561.8	219571	232764	281595	1.09476	0.00796379	4.39461	2.13574	up
mws0628	UPLC-MS/MS	C7H6O2	4-Hydroxybenzaldehyde	Phenolic acids	Phenolic acids	123-08-0	409568	509470	495816	1.3941e+07	1.39485e+07	17995962	1.10251	0.00817066	32.4312	5.01931	up
Lmbn001981	UPLC-MS/MS	C7H6O3	2,5-Dihydroxybenzaldehyde	Phenolic acids	Phenolic acids	1194-98-5	962043	1.17179e+06	525594	3.00128e+06	3.97952e+06	4.22544e+06	1.0408	0.00672955	4.21378	2.07511	up
mws0749	UPLC-MS/MS	C7H6O3	4-Hydroxybenzoic acid	Phenolic acids	Phenolic acids	99-96-7	1.25271e+06	694420	1.19826e+06	4.42009e+06	5.47242e+06	5.49816e+06	1.07128	0.00213464	4.89309	2.29075	up
Lmgn001670	UPLC-MS/MS	C7H6O3	Salicylic acid	Phenolic acids	Phenolic acids	69-72-7	49590.9	57516	43303.4	761162	673412	1.37932e+06	1.08997	0.0572241	18.7081	4.22559	up
Hmgn001653	UPLC-MS/MS	C7H6O3	Protocatechualdehyde	Phenolic acids	Phenolic acids	139-85-5	592436	715823	632502	2.7034e+06	3.23116e+06	3.68276e+06	1.09494	0.0110204	4.95544	2.30901	up
mws0639	UPLC-MS/MS	C7H6O4	2,3-Dihydroxybenzoic Acid*	Phenolic acids	Phenolic acids	303-38-8	78827.1	172878	180749	7.10623e+06	7.67243e+06	9.22713e+06	1.09433	0.00633695	55.5106	5.79469	up
mws0885	UPLC-MS/MS	C7H6O4	2,4-Dihydroxybenzoic acid	Phenolic acids	Phenolic acids	89-86-1	101762	25030.6	92733.6	1.88417e+06	1.79555e+06	2.5387e+06	1.06751	0.0127546	28.3266	4.82409	up
mws0183	UPLC-MS/MS	C7H6O4	3,4-Dihydroxybenzoic acid (Protocatechuic acid)*	Phenolic acids	Phenolic acids	99-50-3	201125	215873	210753	5.99193e+06	6.77995e+06	8.28062e+06	1.10298	0.0095798	33.5364	5.06766	up
mws0024	UPLC-MS/MS	C7H6O5	Gallic acid	Phenolic acids	Phenolic acids	149-91-7	66636.2	112031	107151	881500	676098	1.36122e+06	1.07678	0.0489031	10.2122	3.35222	up
pmb0069	UPLC-MS/MS	C7H7NO	Benzamide	Phenolic acids	Phenolic acids	55-21-0	18454.6	19992.7	43037.5	736599	874782	481081	1.08428	0.0278592	25.6792	4.68253	up
pme2268	UPLC-MS/MS	C7H7NO2	Trigonelline	Alkaloids	Pyridine alkaloids	535-83-1	1.04866e+06	1.19689e+06	1.14478e+06	925175	1.0157e+06	1.1429e+06	0.617324	0.261602	0.90958	-0.136728	insig
mws0444	UPLC-MS/MS	C7H7NO3	3-Aminosalicylic acid	Phenolic acids	Phenolic acids	570-23-0	58884	81372.1	44364.5	2.24867e+06	1.96105e+06	1.96596e+06	1.09923	0.00202439	33.4506	5.06396	up
mws0596	UPLC-MS/MS	C7H7NO3	3-Hydroxyanthranilic acid	Alkaloids	Phenolamine	548-93-6	113618	157967	143610	797713	612524	682549	1.09223	0.00663498	5.0405	2.33357	up
pme0489	UPLC-MS/MS	C7H8N2O	N-Methylnicotinamide	Alkaloids	Pyridine alkaloids	114-33-0	9157.84	10668.1	48614.3	333068	351658	287287	1.03842	0.000424384	14.2024	3.82806	up
mws0566	UPLC-MS/MS	C7H8O2	4-Methylcatechol	Phenolic acids	Phenolic acids	452-86-8	2700.77	3719.47	9394.31	37760.2	40828.4	46577.4	1.04482	0.000493623	7.91461	2.98452	up
pme1738	UPLC-MS/MS	C7H9N2O	3-Carbamyl-1-methylpyridinium;(1-Methylnicotinamide)	Alkaloids	Pyridine alkaloids	1005-24-9	939473	1.04278e+06	1.12485e+06	1.06133e+06	1.01483e+06	1.21785e+06	0.393553	0.48808	1.06016	0.0842759	insig
ML10179289	UPLC-MS/MS	C8H10O	2-Phenylethanol	Phenolic acids	Phenolic acids	1960-12-08	3.21997e+06	4.17058e+06	4.48045e+06	1.71695e+06	1.80369e+06	1.60256e+06	1.07059	0.0250252	0.431573	-1.21232	down
mws2368	UPLC-MS/MS	C8H10O2	Tyrosol; 4-Hydroxyphenylethanol	Phenolic acids	Phenolic acids	501-94-0	82467.9	31511.9	9183.16	91883.6	96043.1	216769	0.800793	0.134785	3.28586	1.71627	insig
pme1002	UPLC-MS/MS	C8H11NO	L-Tyramine	Alkaloids	Alkaloids	51-67-2	247972	224366	399388	251717	316609	442913	0.332848	0.585322	1.16004	0.214177	insig
pme1383	UPLC-MS/MS	C8H11NO3	Pyridoxine	Others	Vitamin	65-23-6	1.35739e+06	1.47326e+06	1.45285e+06	6.4912e+06	8.25169e+06	6.00133e+06	1.09618	0.0149567	4.84281	2.27584	up
pme3081	UPLC-MS/MS	C8H12N2O2	4-(Aminomethyl)-5-(hydroxymethyl)-2-methylpyridin-3-ol	Alkaloids	Alkaloids	85-87-0	684912	900951	694330	19086.2	13171.4	5280.55	1.08572	0.0086113	0.0164627	-5.92465	down
MWStz091	UPLC-MS/MS	C8H12N2O2	Cyclo(L-Ala-L-Pro)	Amino acids and derivatives	Amino acids and derivatives	36357-32-1	67963.7	83291.6	61570.3	8.08939e+06	6.89362e+06	9.88924e+06	1.10295	0.0110294	116.867	6.86872	up
Lmrj001341	UPLC-MS/MS	C8H12N2O3	Cyclo(Ser-Pro)	Amino acids and derivatives	Amino acids and derivatives	-	85507.7	98987.2	199724	3.45448e+06	4.07178e+06	4.08179e+06	1.09178	0.00241492	30.2121	4.91705	up
pme1306	UPLC-MS/MS	C8H12NO6P	Pyridoxine-5'-phosphate	Others	Vitamin	447-05-2	4050.09	27483.7	36384.6	71736.3	108332	257056	0.878292	0.158594	6.43602	2.68617	insig
Lmrj002261	UPLC-MS/MS	C8H14N2O2	Cyclo(Val-Ala)	Amino acids and derivatives	Amino acids and derivatives	15136-27-3	45510.7	45185.9	30042.4	1.36633e+06	1.32126e+06	1.58799e+06	1.10104	0.0034216	35.4118	5.14616	up
pme2566	UPLC-MS/MS	C8H14N2O5	5-L-Glutamyl-L-amino acid	Amino acids and derivatives	Amino acids and derivatives	5875-41-2	42742.8	73370.8	131256	156887	103465	108164	0.628559	0.273509	1.48974	0.575064	insig
Lmqp000329	UPLC-MS/MS	C8H14N3O7P	5-Aminoimidazole ribonucleotide	Nucleotides and derivatives	Nucleotides and derivatives	25635-88-5	488891	668732	437723	538732	594111	556230	0.297574	0.702704	1.05875	0.0823626	insig
mws0242	UPLC-MS/MS	C8H14O4	Suberic Acid	Organic acids	Organic acids	505-48-6	145141	127988	122783	298892	292492	360033	1.08518	0.0083497	2.40311	1.2649	up
MWS1837	UPLC-MS/MS	C8H15NO2	Tranexamic Acid	Organic acids	Organic acids	1197-18-8	1.88042e+06	1.59431e+06	1.72655e+06	752879	1.18263e+06	626054	0.978038	0.0195934	0.492487	-1.02184	insig
MWSslk038	UPLC-MS/MS	C8H15NO3	6-Acetamidohexanoic acid	Organic acids	Organic acids	1957-08-09	9	85714.5	341666	767204	883433	766330	0.651047	0.0140669	5.65518	2.49957	insig
pme0253	UPLC-MS/MS	C8H15NO3	N-Acetyl-L-leucine	Amino acids and derivatives	Amino acids and derivatives	1188-21-2	39389.5	19982.7	47360.3	475556	333271	492263	1.07715	0.0138857	12.1902	3.60765	up
mws2608	UPLC-MS/MS	C8H15NO6	N-Acetyl-D-galactosamine	Others	Saccharides	1811-31-0	355607	370025	301248	483982	434589	525722	0.992207	0.0159798	1.40649	0.492096	insig
mws4174	UPLC-MS/MS	C8H15NO6	N-Acetyl-D-mannosamine	Others	Saccharides	7772-94-3	378679	561359	496528	205045	209308	330586	0.956369	0.0296663	0.518555	-0.94743	insig
pme2755	UPLC-MS/MS	C8H15NO6	N-Acetyl-D-glucosamine	Others	Saccharides	7512-17-6	814174	931371	853899	388693	315538	495604	1.04475	0.00301291	0.461573	-1.11537	down
mws5041	UPLC-MS/MS	C8H16N2O3	L-Glycyl-L-isoleucine	Amino acids and derivatives	Amino acids and derivatives	19461-38-2	1.74879e+06	2.40347e+06	3.89268e+06	1.46279e+06	1.46757e+06	1.78414e+06	0.782773	0.219792	0.586021	-0.770977	insig
pme0122	UPLC-MS/MS	C8H16N2O3	N6-Acetyl-L-lysine	Amino acids and derivatives	Amino acids and derivatives	692-04-6	4.21757e+06	3.1247e+06	4.284e+06	3.26197e+06	3.82542e+06	2.49254e+06	0.577115	0.274406	0.823989	-0.279303	insig
pme2890	UPLC-MS/MS	C8H16N2O4S2	L-Homocystine	Amino acids and derivatives	Amino acids and derivatives	626-72-2	143126	201988	259968	154920	122400	149895	0.721605	0.215069	0.706043	-0.502171	insig
pme0170	UPLC-MS/MS	C8H16N4O3	N-Acetyl-L-Arginine	Amino acids and derivatives	Amino acids and derivatives	155-84-0	180314	284645	264589	2.47818e+07	3.11653e+07	1.61293e+07	1.09899	0.0319567	98.7961	6.62638	up
Hmlp000229	UPLC-MS/MS	C8H16O6	Dambonitol	Others	Saccharides	523-94-4	80634.8	85611.8	99799.2	157860	94911.3	99383.3	0.657209	0.290431	1.32366	0.404534	insig
MWS04412	UPLC-MS/MS	C8H18N2O2	N(6),N(6)-Dimethyl-L-lysine	Amino acids and derivatives	Amino acids and derivatives	2259-86-1	1.33791e+06	1.1993e+06	1.31592e+06	701109	757170	272453	0.886756	0.0357092	0.449175	-1.15465	insig
MWS5164	UPLC-MS/MS	C8H18N4O2	N,N'-Dimethylarginine;SDMA*	Amino acids and derivatives	Amino acids and derivatives	30344-00-4	4.82733e+06	5.23158e+06	4.68998e+06	2.85979e+07	3.07205e+07	2.44416e+07	1.1009	0.0060508	5.67907	2.50565	up
NK10251888	UPLC-MS/MS	C8H18N4O2	NG,NG-Dimethyl-L-arginine*	Amino acids and derivatives	Amino acids and derivatives	30315-93-6	4.93458e+06	5.00823e+06	4.75815e+06	2.96187e+07	2.983e+07	2.36247e+07	1.10061	0.00780816	5.65088	2.49848	up
mws0120	UPLC-MS/MS	C8H20NO6P	Choline Alfoscerate	Lipids	PC	28319-77-9	2.05909e+06	1.86633e+06	2.16807e+06	1.32687e+06	1.74084e+06	2.14187e+06	0.569462	0.338755	0.854942	-0.226102	insig
pmp001285	UPLC-MS/MS	C8H4O3	Phthalic anhydride	Phenolic acids	Phenolic acids	85-44-9	4.15236e+06	3.96311e+06	4.26516e+06	3.97693e+06	4.9586e+06	4.60955e+06	0.587188	0.307923	1.09405	0.129685	insig
mws0489	UPLC-MS/MS	C8H6O3	Benzoylformic acid	Organic acids	Organic acids	611-73-4	39597.7	31609.3	30211.5	414195	413612	424743	1.10241	2.27246e-07	12.3503	3.62648	up
pmb1096	UPLC-MS/MS	C8H7N	Indole	Alkaloids	Plumerane	120-72-9	7.69701e+06	5.4692e+06	1.00607e+07	82977.4	2.80224e+06	38686.4	0.88712	0.0175049	0.125884	-2.98983	insig
pme3083	UPLC-MS/MS	C8H7NO3	2-(Formylamino)benzoic acid	Phenolic acids	Phenolic acids	3342-77-6	87318.4	88548.9	66283.7	185474	189743	206748	1.07757	0.000329442	2.40331	1.26503	up
Hmbn002174	UPLC-MS/MS	C8H8O2	4-Hydroxyacetophenone	Phenolic acids	Phenolic acids	99-93-4	38777.8	41600.1	54570.3	88973.9	119606	122854	1.04946	0.0141875	2.456	1.29631	up
Zmyn002323	UPLC-MS/MS	C8H8O3	2-Hydroxyphenylacetic acid	Organic acids	Organic acids	614-75-5	22047.7	20468.2	15208	99721.1	110759	94595.3	1.09334	0.000914721	5.28507	2.40192	up
mws0182	UPLC-MS/MS	C8H8O3	4-Hydroxyphenylacetic acid	Phenolic acids	Phenolic acids	156-38-7	14533	22533.4	37935.3	98263.7	154302	140861	1.03858	0.0142026	5.24557	2.3911	up
mws0145	UPLC-MS/MS	C8H8O3	O-Anisic acid (2-Methoxybenzoic acid)	Phenolic acids	Phenolic acids	529-75-9	927.934	5356.63	11409.8	61898.1	58346.7	68966.1	0.974729	0.000195366	10.6933	3.41864	insig
mws0458	UPLC-MS/MS	C8H8O3	Vanillin; 4-Hydroxy-3-Methoxybenzaldehyde	Phenolic acids	Phenolic acids	121-33-5	625954	775747	686122	4.44327e+06	4.84721e+06	6.32397e+06	1.09626	0.0152674	7.47882	2.90281	up
mws0028	UPLC-MS/MS	C8H8O4	Vanillic acid	Phenolic acids	Phenolic acids	121-34-6	44682.4	106131	66384.5	970566	1.22337e+06	1.45919e+06	1.08459	0.0137188	16.8193	4.07205	up
pme0309	UPLC-MS/MS	C8H8O5	3-O-Methylgallic Acid*	Phenolic acids	Phenolic acids	3934-84-7	22911.6	32610.9	31045.6	147229	126394	252593	1.06657	0.063444	6.07864	2.60375	up
HJN037	UPLC-MS/MS	C8H8O5	4-O-Methylgallic Acid*	Phenolic acids	Phenolic acids	4319-02-02	41432.7	45553.1	40105.5	126797	89029	206692	1.01337	0.104568	3.32452	1.73315	up
pmp001287	UPLC-MS/MS	C8H9N	N-Benzylmethylene isomethylamine	Alkaloids	Alkaloids	-	511895	451043	642638	1.11502e+06	1.23135e+06	872792	1.01977	0.0197749	2.00499	1.0036	up
HJKP000649	UPLC-MS/MS	C8H9NO	N-benzylformamide	Alkaloids	Alkaloids	6343-54-0	1.7714e+07	1.79326e+07	2.38768e+07	1.4437e+07	1.3427e+07	1.38388e+07	0.957474	0.0957513	0.700611	-0.513314	insig
NK10253223	UPLC-MS/MS	C8H9NO3	2-Amino-3-methoxybenzoic acid	Phenolic acids	Phenolic acids	3177-80-8	172068	124101	145223	1.70591e+06	1.78294e+06	1.78637e+06	1.10157	1.23539e-05	11.9514	3.5791	up
Zmjp000624	UPLC-MS/MS	C8H9NO3	Pyridoxal	Others	Vitamin	66-72-8	291887	222380	213475	5.12694e+06	6.06196e+06	5.18383e+06	1.10202	0.0031806	22.498	4.49172	up
pme2596	UPLC-MS/MS	C8H9NO4	4-Pyridoxic acid	Others	Vitamin	82-82-6	3.49423e+06	4.02902e+06	3.91843e+06	3.50675e+06	3.94544e+06	3.68808e+06	0.253825	0.653894	0.973656	-0.0385156	insig
MWS0577	UPLC-MS/MS	C9H10INO3	3-Iodo-L-Tyrosine	Amino acids and derivatives	Amino acids and derivatives	70-78-0	186201	157154	179842	18110.7	13022.7	13397.8	1.09963	0.00231834	0.0851134	-3.55447	down
MWS2010	UPLC-MS/MS	C9H10N2O5	3-nitro-L-tyrosine	Amino acids and derivatives	Amino acids and derivatives	621-44-3	135773	108655	109741	3.48843e+07	2.14694e+07	2.41097e+07	1.10299	0.0228041	227.19	7.82775	up
Lmrn003000	UPLC-MS/MS	C9H10O3	2-Hydroxy-3-phenylpropanoic acid	Phenolic acids	Phenolic acids	7326-19-4	610.444	4625.92	511.977	63786.6	36855.4	40257.4	1.0286	0.0308784	24.5113	4.61538	up
mws0467	UPLC-MS/MS	C9H10O3	3-(4-Hydroxyphenyl)-propionic acid	Phenolic acids	Phenolic acids	501-97-3	9858.43	8914.21	10077.3	102208	61070.9	80165	1.09361	0.0264254	8.4383	3.07695	up
MWS0274	UPLC-MS/MS	C9H10O3	DL-3-Phenyllactic acid	Organic acids	Organic acids	828-01-3	6159.94	8212.88	6700.27	79112.8	51492.5	50425.4	1.09157	0.0291926	8.59061	3.10276	up
Hmtn001288	UPLC-MS/MS	C9H10O4	Methyl 2,4-dihydroxyphenylacetate	Phenolic acids	Phenolic acids	67828-42-6	8211.2	8531.04	6234.44	117389	47728.1	89037.8	1.0742	0.0623216	11.0614	3.46747	up
mws0160	UPLC-MS/MS	C9H10O4	3,4-Dihydroxybenzoic Acid Ethyl Ester (Protocatechuic acid ethyl ester)	Phenolic acids	Phenolic acids	3943-89-3	3567.75	2300.14	2309.54	65200.8	81097.6	64830.2	1.0994	0.00597674	25.8185	4.69033	up
mws1350	UPLC-MS/MS	C9H10O4	Syringaldehyde; 4-Hydroxy-3,5-Dimethoxybenzaldehyde	Phenolic acids	Phenolic acids	134-96-3	26792.2	28062.6	20443.5	2.09437e+06	1.81116e+06	3.27868e+06	1.10024	0.034143	95.41	6.57607	up
Lmlp001436	UPLC-MS/MS	C9H10O4	Dihydrocaffeic acid	Phenolic acids	Phenolic acids	1078-61-1	9	9	9	429376	407582	534301	1.10467	0.00724436	50787.4	15.6322	up
pmb2497	UPLC-MS/MS	C9H10O5	4-Hydroxy-3-methoxymandelate	Phenolic acids	Phenolic acids	1955-10-07	72328.9	56775.7	62363	343783	291825	349676	1.09811	0.00315352	5.14596	2.36344	up
mws0027	UPLC-MS/MS	C9H10O5	Syringic acid	Phenolic acids	Phenolic acids	530-57-4	18155.2	9362.01	6270.51	667119	502699	1.173e+06	1.08605	0.0622761	69.3392	6.1156	up
mws0984	UPLC-MS/MS	C9H11N5O3	L-Sepiapterin	Nucleotides and derivatives	Nucleotides and derivatives	17094-01-8	8457.95	11640.2	9876.32	361910	369817	348327	1.10335	0.000246136	36.0325	5.17123	up
pme0021	UPLC-MS/MS	C9H11NO2	L-Phenylalanine	Amino acids and derivatives	Amino acids and derivatives	63-91-2	1.15592e+06	995139	1.3746e+06	2.23353e+06	2.35358e+06	1.63381e+06	0.980091	0.0379129	1.76447	0.819236	insig
MWS04559g	UPLC-MS/MS	C9H11NO3	3-Hydroxy-L-phenylalanine	Amino acids and derivatives	Amino acids and derivatives	587-33-7	1.74008e+06	1.92295e+06	2.75932e+06	2.28734e+06	1.66358e+06	2.07071e+06	0.170803	0.735877	0.937607	-0.0929449	insig
mws0250	UPLC-MS/MS	C9H11NO3	L-Tyrosine	Amino acids and derivatives	Amino acids and derivatives	60-18-4	1.9266e+06	1.93966e+06	2.94471e+06	2.43318e+06	1.79744e+06	2.27493e+06	0.11013	0.808991	0.955158	-0.0661885	insig
MWStz070	UPLC-MS/MS	C9H11NO3	N-(2-Hydroxy-4-methoxyphenyl)acetamide	Alkaloids	Phenolamine	58469-06-0	6.65085e+06	6.51574e+06	8.54302e+06	7.26529e+06	5.45534e+06	7.04879e+06	0.385932	0.498468	0.91063	-0.135063	insig
pme3827	UPLC-MS/MS	C9H11NO4	3,4-Dihydroxy-L-phenylalanine (L-Dopa)	Amino acids and derivatives	Amino acids and derivatives	59-92-7	1.45121e+06	1.83518e+06	1.66299e+06	2.90165e+06	2.71782e+06	3.12511e+06	1.0646	0.00146681	1.7668	0.821138	insig
pme3882	UPLC-MS/MS	C9H12N2O5	2'-Deoxyuridine	Nucleotides and derivatives	Nucleotides and derivatives	951-78-0	25512.2	30878.9	21038.5	113099	110990	122620	1.09224	5.74137e-05	4.47772	2.16277	up
MWSmce295	UPLC-MS/MS	C9H12N2O6	1-beta-D-Arabinofuranosyluracil	Nucleotides and derivatives	Nucleotides and derivatives	3083-77-0	465103	667990	600627	2.78912e+06	2.64913e+06	3.12286e+06	1.09295	0.0011394	4.938	2.30393	up
mws0976	UPLC-MS/MS	C9H12N2O6	β-Pseudouridine	Nucleotides and derivatives	Nucleotides and derivatives	1445-07-4	78249.3	81370.3	67102.3	1.20524e+06	1.16205e+06	1.01843e+06	1.10316	0.0027301	14.9334	3.90047	up
mws0248	UPLC-MS/MS	C9H12N2O6	Uridine	Nucleotides and derivatives	Nucleotides and derivatives	58-96-8	602731	637349	344065	1.01735e+07	9.12975e+06	8.1342e+06	1.09385	0.0038938	17.3201	4.11437	up
MWS20633g	UPLC-MS/MS	C9H12NO6P	O-phosphate-L-tyrosine	Amino acids and derivatives	Amino acids and derivatives	21820-51-9	296065	214518	268833	1.85268e+07	1.42404e+07	1.60208e+07	1.103	0.00596692	62.5956	5.96799	up
pme3188	UPLC-MS/MS	C9H13N2O9P	Uridine 5'-monophosphate	Nucleotides and derivatives	Nucleotides and derivatives	58-97-9	47352.6	27398.3	32912.1	281479	301362	359569	1.09058	0.0047452	8.75334	3.12983	up
pme1194	UPLC-MS/MS	C9H13N3O4	2'-Deoxycytidine	Nucleotides and derivatives	Nucleotides and derivatives	951-77-9	92935.6	94531.3	107275	433137	414595	265597	1.07283	0.0349259	3.7773	1.91736	up
pme3732	UPLC-MS/MS	C9H13N3O5	Cytidine	Nucleotides and derivatives	Nucleotides and derivatives	65-46-3	7.07574e+06	1.17627e+07	1.06724e+07	4.05992e+07	4.16655e+07	4.23991e+07	1.08034	0.000653611	4.22434	2.07873	up
pmp001073	UPLC-MS/MS	C9H13NO2	Synephrine; 4-[1-Hydroxy-2-(methylamino)ethyl]phenol	Alkaloids	Phenolamine	1994-07-05	1.04468e+06	1.11798e+06	1.04164e+06	1.56389e+07	1.44904e+07	1.60476e+07	1.10437	0.00102717	14.4109	3.84909	up
pme3007	UPLC-MS/MS	C9H14N2O12P2	Uridine 5'-diphosphate	Nucleotides and derivatives	Nucleotides and derivatives	27821-45-0	441436	403851	491073	9	9	9	1.10479	0.00319994	2.02041e-05	-15.595	down
pme1373	UPLC-MS/MS	C9H14N3O7P	2'-Deoxycytidine-5'-monophosphate	Nucleotides and derivatives	Nucleotides and derivatives	1032-65-1	5833.66	4842.48	13372.6	662599	1.01567e+06	321991	1.08204	0.0812794	83.1751	6.37808	up
MWSslk257	UPLC-MS/MS	C9H14N3O8P	Cytidine 5'-monophosphate(Cytidylic acid)	Nucleotides and derivatives	Nucleotides and derivatives	63-37-6	78659.5	23328.7	79594	740369	701681	859564	1.05581	0.00165979	12.6753	3.66395	up
pme0116	UPLC-MS/MS	C9H14N4O3	L-Carnosine	Amino acids and derivatives	Amino acids and derivatives	305-84-0	272315	170914	134398	295898	213597	199389	0.48465	0.443996	1.22723	0.295411	insig
MWS201414	UPLC-MS/MS	C9H15N3O4	Pro-Asn	Amino acids and derivatives	Amino acids and derivatives	107856-82-6	1.12465e+06	894045	1.10991e+06	9.18023e+06	1.04308e+07	8.52919e+06	1.10079	0.00391498	8.99448	3.16904	up
Zmdp000446	UPLC-MS/MS	C9H16N2O5S	γ-L-Glutamyl-S-methyl-L-cysteine	Amino acids and derivatives	Amino acids and derivatives	-	5.34432e+06	6.01394e+06	7.29778e+06	738907	684604	377560	1.08399	0.00830862	0.0965409	-3.37272	down
mws0237	UPLC-MS/MS	C9H16O4	Azelaic acid	Organic acids	Organic acids	123-99-9	2.28012e+06	1.95863e+06	1.83584e+06	1.58261e+07	1.26479e+07	1.8421e+07	1.0963	0.0142758	7.71987	2.94858	up
mws1337	UPLC-MS/MS	C9H17NO5	D-Pantothenic Acid	Others	Vitamin	79-83-4	9.74216e+06	1.08228e+07	1.0235e+07	1.15305e+06	1.40627e+06	1.06527e+06	1.10109	0.000436308	0.117682	-3.08704	down
Zmgn001039	UPLC-MS/MS	C9H17NO6S	S-Ribosyl-L-homocysteine	Amino acids and derivatives	Amino acids and derivatives	-	9798.85	8159.56	9559.17	49131	50664.6	41226.4	1.09894	0.00484675	5.12479	2.35749	up
mws5037	UPLC-MS/MS	C9H18N2O3	L-Alanyl-L-leucine	Amino acids and derivatives	Amino acids and derivatives	3303-34-2	10318.3	7729.82	16815.8	217758	240185	58585.8	1.02862	0.106503	14.8155	3.88904	up
Lmqn000432	UPLC-MS/MS	C9H19O11P	1-(sn-Glycero-3-phospho)-1D-myo-inositol	Others	Saccharides	-	5.80983e+06	5.18771e+06	2.8481e+06	3.41319e+06	2.69813e+06	2.8446e+06	0.715026	0.207693	0.646841	-0.628517	insig
Zmzp000145	UPLC-MS/MS	C9H20N2O2	Trimethyllysine	Amino acids and derivatives	Amino acids and derivatives	23284-33-5	1.66462e+07	1.28032e+07	1.73286e+07	1.23142e+07	1.62139e+07	1.01589e+07	0.570029	0.302416	0.827032	-0.273985	insig
Zmpn003044	UPLC-MS/MS	C9H6O3	7-Hydroxycoumarin;Umbelliferone	Lignans and Coumarins	Coumarins	93-35-6	70794.5	108429	87911.6	59828.2	36172.5	7703.47	0.771355	0.0480334	0.388209	-1.3651	insig
mws1013	UPLC-MS/MS	C9H6O4	Esculetin (6,7-Dihydroxycoumarin)	Lignans and Coumarins	Coumarins	305-01-1	1.28928e+06	1.7355e+06	1.40461e+06	85041.1	80475	238171	1.06229	0.00460357	0.0911384	-3.4558	down
Qmkp093004	UPLC-MS/MS	C9H7NO	Indole-3-carboxaldehyde	Alkaloids	Plumerane	487-89-8	3.37797e+07	2.688e+07	4.69211e+07	331797	338076	259145	1.10149	0.0262652	0.00863553	-6.8555	down
mws1417	UPLC-MS/MS	C9H7NO2	Indole-3-carboxylic acid*	Alkaloids	Plumerane	771-50-6	95342.8	111444	82521.9	32531.7	61849.6	38217.2	0.979944	0.0132246	0.458329	-1.12554	insig
mws0102	UPLC-MS/MS	C9H7NO2	Indole-5-carboxylic acid*	Alkaloids	Plumerane	1670-81-1	57879.6	68101	48593.6	12743.2	10320.7	14025.7	1.08889	0.0123885	0.212458	-2.23475	down
Lmmn001643	UPLC-MS/MS	C9H8O3	2-Hydroxycinnamic acid*	Phenolic acids	Phenolic acids	583-17-5	193672	177384	162781	830392	844019	992600	1.09978	0.00433612	4.99593	2.32075	up
Lmbn002648	UPLC-MS/MS	C9H8O3	α-Hydroxycinnamic Acid*	Phenolic acids	Phenolic acids	5801-57-0	193672	177384	162781	830392	844019	992600	1.09978	0.00433612	4.99593	2.32075	up
mws0159	UPLC-MS/MS	C9H8O3	Phenylpyruvic acid	Organic acids	Organic acids	156-06-9	17792.3	35623.2	32875.8	629551	557344	482657	1.09194	0.00572721	19.3479	4.2741	up
pme1439	UPLC-MS/MS	C9H8O3	p-Coumaric acid	Phenolic acids	Phenolic acids	501-98-4	58549.2	81737.4	27540	330917	288097	358624	1.0416	0.000663047	5.82528	2.54233	up
MWSmce001	UPLC-MS/MS	C9H8O4	5-Acetylsalicylic acid	Phenolic acids	Phenolic acids	13110-96-8	9	9	9	812339	1.19418e+06	932664	1.1046	0.0129784	108859	16.7321	up
mws2212	UPLC-MS/MS	C9H8O4	Caffeic acid	Phenolic acids	Phenolic acids	331-39-5	349021	518635	484764	2.43335e+06	1.93719e+06	3.34685e+06	1.07601	0.0340961	5.70635	2.51257	up
MWS2040	UPLC-MS/MS	CH4O3S	Methanesulfonic acid	Organic acids	Organic acids	75-75-2	293504	226855	365026	3.99138e+06	5.56807e+06	4.59758e+06	1.0967	0.0101713	15.9897	3.99907	up
XMW0670	GC-MS	C4H5N3	Acetonitrile, 2,2'-iminobis-	Nitrogen compounds	-	628-87-5	9	9	9	15282.1	15358.2	14054.8	1.10483	0.000803749	1655.37	10.6929	up
KMW0182	GC-MS	C9H14O	Furan, 2-pentyl-	Heterocyclic compound	-	3777-69-3	73568.1	50287.1	92150.3	9	9	9	1.104	0.0271489	0.000124997	-12.9658	down
NMW0748	GC-MS	C3H6O2	Glycidol	Alcohol	-	556-52-5	212928	231370	237361	9	9	9	1.10482	0.00104544	3.96093e-05	-14.6238	down
KMW0319	GC-MS	C10H16O	7-Oxabicyclo[4.1.0]heptane, 1-methyl-4-(1-methylethenyl)-	Terpenoids	-	1195-92-2	2309.22	1601.47	2437.83	11609.7	16549.1	11163.6	1.08346	0.0217603	6.19395	2.63086	up
XMW0717	GC-MS	C9H10O	Ethanone, 1-(2-methylphenyl)-	Ketone	-	577-16-2	318454	431223	361510	58222.5	52030.1	23131.1	1.06378	0.00571256	0.120037	-3.05845	down
XMW1309	GC-MS	C8H12N2	Pyrazine, tetramethyl-	Heterocyclic compound	-	1124-11-4	2.43038e+06	2.08299e+06	2.06313e+06	310875	293079	272791	1.10238	0.00367518	0.133315	-2.90709	down
KMW0386	GC-MS	C10H16O	cis-Dihydrocarvone	Terpenoids	-	3792-53-8	1.818e+07	2.14453e+07	1.86832e+07	719686	729437	634790	1.10386	0.00289983	0.0357395	-4.80634	down
KMW0062	GC-MS	C5H10O	Prenol	Alcohol	-	556-82-1	3.21163e+06	3.71594e+06	3.65594e+06	9	9	9	1.10481	0.00202643	2.55114e-06	-18.5804	down
XMW0689	GC-MS	C8H10N2O	Ethanone, 1-(3,5-dimethylpyrazinyl)-	Heterocyclic compound	-	54300-08-2	2155.38	2324.99	2115.68	626907	487889	103693	1.07818	0.12296	184.73	7.52927	up
NMW0758	GC-MS	C6H12O2	1-Butanol, 3-methyl-, formate	Ester	-	110-45-2	112915	144271	153735	10763.4	15888.8	17355.8	1.09224	0.00866523	0.107096	-3.22303	down
XMW1400	GC-MS	C6H14FO2P	n-Pentyl methylphosphonofluoridate	Others	-	13454-59-6	4395.55	6480.67	3628.21	2895.48	2656.45	2741.41	0.925506	0.134843	0.571779	-0.80647	insig
KMW0296	GC-MS	C10H16	Cyclohexene, 1-methyl-4-(1-methylethylidene)-	Terpenoids	-	586-62-9	129548	108476	110587	33136.7	32726	27736.9	1.09639	0.00403053	0.268493	-1.89704	down
KMW0046	GC-MS	C6H12O	2-Hexanone	Ketone	-	591-78-6	118202	159615	167038	9194.6	11574.4	12273.1	1.09876	0.0117939	0.0742761	-3.75096	down
KMW0055	GC-MS	C5H6S	Thiophene, 2-methyl-	Heterocyclic compound	-	554-14-3	28450.1	25258.6	36039.5	333314	218348	186105	1.08504	0.0396031	8.2204	3.03921	up
XMW0115	GC-MS	C4H9NO	5-Methyloxazolidine	Heterocyclic compound	-	58328-22-6	26116.6	35306.7	50484.6	4944.27	10529.2	4581.65	1.03571	0.0418781	0.179211	-2.48027	down
KMW0067	GC-MS	C6H10O	3-Penten-2-one, 4-methyl-	Ketone	-	141-79-7	9142.89	10508.5	16220.5	1521.2	1191.42	1497.49	1.08758	0.0394056	0.117365	-3.09092	down
XMW1430	GC-MS	C5H4O2	3-FurAldehyde	Heterocyclic compound	-	498-60-2	9	9	9	2.31981e+06	1.98636e+06	2.76257e+06	1.10469	0.00898092	261806	17.9981	up
XMW1298	GC-MS	C8H16O2	2-Butanol, 2,3-dimethyl-, acetate	Ester	-	4806-33-1	73863.5	264413	200908	188138	175241	108792	0.038079	0.741316	0.875714	-0.191468	insig
KMW0133	GC-MS	C7H16O	1-Hexanol, 4-methyl-	Alcohol	-	818-49-5	1.36172e+06	1.63159e+06	1.39683e+06	72934.6	81666	69268.8	1.10343	0.00364785	0.0509937	-4.29354	down
NMW0010	GC-MS	C10H12	Dicyclopentadiene	Hydrocarbons	-	77-73-6	53907.3	67038	59601.6	9	9	9	1.10473	0.00396769	0.000149546	-12.7071	down
KMW0236	GC-MS	C7H11NS	2-Isobutylthiazole	Heterocyclic compound	-	18640-74-9	6304.97	7325.78	6112.48	12292.4	10658.1	10712.6	1.06652	0.00312689	1.70504	0.769808	insig
XMW0417	GC-MS	C10H16	Cyclohexene, 4-methyl-1-(1-methylethenyl)-	Hydrocarbons	-	586-67-4	6.69723e+07	5.64314e+07	5.63054e+07	4.11489e+06	3.41296e+06	2.77342e+06	1.1002	0.00356204	0.0573219	-4.12477	down
KMW0278	GC-MS	C6H6OS	Ethanone, 1-(2-thienyl)-	Heterocyclic compound	-	88-15-3	42970.7	39632.2	45778.5	148344	160109	82615.8	1.028	0.0673953	3.04614	1.60698	up
w48	GC-MS	C10H18O	2H-Pyran, tetrahydro-4-methyl-2-(2-methyl-1-propenyl)-	Terpenoids	-	16409-43-1	843096	751625	769512	582730	643091	621276	1.03716	0.0102052	0.781267	-0.356113	insig
KMW0321	GC-MS	C8H14O2	Cyclohexanecarboxylic acid, methyl ester	Ester	-	4630-82-4	18737.5	21256.1	23482.5	8197.97	10151.1	7999.25	1.07754	0.00425093	0.41509	-1.2685	down
WMW0062	GC-MS	C9H18O	3-Nonen-1-ol, (Z)-	Alcohol	-	10340-23-5	82950.7	111019	89477.9	223263	230042	252749	1.08172	0.000336864	2.49095	1.3167	up
XMW1138	GC-MS	C10H18O	6-Octen-1-ol, 7-methyl-3-methylene-	Terpenoids	-	13066-51-8	6.62028e+06	6.81667e+06	6.26408e+06	3.00191e+06	3.24172e+06	3.2486e+06	1.09972	0.000366147	0.481814	-1.05345	down
XMW0943	GC-MS	C13H28	Undecane, 3,5-dimethyl-	Hydrocarbons	-	17312-81-1	1.18129e+06	1.47964e+06	1.2047e+06	93245.7	94767.6	73703.4	1.1011	0.006095	0.0677036	-3.88462	down
D81	GC-MS	C9H12O3	2-Furanpropanoic acid, ethyl ester	Heterocyclic compound	-	10031-90-0	1.79004e+06	2.09554e+06	1.84656e+06	301927	320109	235847	1.09791	0.00190143	0.149662	-2.74022	down
WMW0045	GC-MS	C5H8O	Furan, 2,3-dihydro-4-methyl-	Heterocyclic compound	-	34314-83-5	12564.4	14071.4	11726.3	9	9	9	1.10472	0.00287028	0.000703819	-10.4725	down
KMW0057	GC-MS	C5H10O	2-Penten-1-ol, (Z)-	Alcohol	-	1576-95-0	590971	637926	562723	9	9	9	1.10481	0.00134596	1.50702e-05	-16.0179	down
XMW0569	GC-MS	C6H14O	2-Hexanol, (R)-	Alcohol	-	26549-24-6	2.67082e+06	3.10227e+06	3.46529e+06	1.48389e+06	1.55452e+06	1.50744e+06	1.07969	0.0201746	0.492062	-1.02309	down
XMW0516	GC-MS	C7H8	1,3,5-Cycloheptatriene	Hydrocarbons	-	544-25-2	33951.7	35526.7	37104.6	9	9	9	1.10482	0.000655983	0.000253323	-11.9467	down
KMW0068	GC-MS	C6H10O	3-Hexenal, (Z)-	Aldehyde	-	6789-80-6	138807	188154	165519	2955.98	4279.55	2661.3	1.10074	0.00771084	0.0200959	-5.63696	down
KMW0079	GC-MS	C8H18	Octane	Hydrocarbons	-	111-65-9	210847	286828	279245	11839.6	9039.19	9479.53	1.10124	0.00922679	0.0390752	-4.6776	down
KMW0066	GC-MS	C6H12O	Hexanal	Aldehyde	-	66-25-1	356183	448660	632465	68835.6	60375.5	72913.4	1.08721	0.0365192	0.140627	-2.83005	down
XMW0256	GC-MS	C6H10O	3-Methylpenta-1,3-diene-5-ol, (E)-	Alcohol	-	1572-08-3	368450	1.28547e+06	933531	867289	714275	441687	0.203096	0.571212	0.781949	-0.354854	insig
XMW0655	GC-MS	C4H8O2	2-Butene-1,4-diol, (Z)-	Alcohol	-	6117-80-2	326682	228535	292438	37461.1	30931.5	26256.7	1.09467	0.0120642	0.11166	-3.16281	down
KMW0217	GC-MS	C10H16	D-Limonene	Terpenoids	-	5989-27-5	65984.2	53263	41773.8	257068	68554.1	59261	0.620339	0.366367	2.39027	1.25717	insig
NMW0031	GC-MS	C8H15NO	Hygrine	Heterocyclic compound	-	496-49-1	853249	708674	783532	541038	592003	578570	1.03182	0.0258125	0.729757	-0.454513	insig
XMW0411	GC-MS	C8H16O	Cyclohexanol, 2,6-dimethyl-	Alcohol	-	5337-72-4	4.45361e+06	3.86236e+06	4.17644e+06	82817.6	84065.3	98905.6	1.10419	0.001737	0.021276	-5.55463	down
XMW0907	GC-MS	C9H12O3	2-(2-Acetoxy-1-propyl)furan, (S)	Heterocyclic compound	-	60830-70-8	42427.7	44950.8	47895.7	30133.3	29838.7	17147.2	0.929394	0.0331797	0.570095	-0.810726	insig
XMW0914	GC-MS	C5H6N2O	Ethanone, 1-(1H-pyrazol-4-yl)-	Heterocyclic compound	-	25016-16-4	1.93278e+06	2.82822e+06	1.70212e+06	8.1058e+06	8.98085e+06	8.85793e+06	1.07882	0.000166356	4.01425	2.00513	up
NMW0074	GC-MS	C10H16O	Bicyclo[3.1.1]hept-2-ene-2-methanol, 6,6-dimethyl-	Terpenoids	-	515-00-4	6.36417e+07	7.63483e+07	6.58331e+07	1.74374e+06	1.7475e+06	1.06441e+06	1.10006	0.00331225	0.0221338	-5.4976	down
KMW0058	GC-MS	C10H18O2	2H-Pyran-3-ol, 6-ethenyltetrahydro-2,2,6-trimethyl-	Heterocyclic compound	-	14049-11-7	2.12069e+06	1.51098e+06	1.37541e+06	731430	840576	694723	1.03647	0.0530196	0.452704	-1.14336	down
XMW0637	GC-MS	C7H12O	Cyclobutanone, 2,2,3-trimethyl-	Ketone	-	1449-49-6	61439.5	67431.9	58125.3	19269.8	23921.3	15703.5	1.07852	0.000325496	0.31495	-1.6668	down
XMW0279	GC-MS	C7H14O	E-1-Methoxy-4-hexene	Hydrocarbons	-	134777-60-9	70636.2	92192.7	126460	13457.2	11647.8	13737.7	1.08791	0.0356921	0.13427	-2.89679	down
KMW0070	GC-MS	C8H10	Benzene, 1,3-dimethyl-	Aromatics	-	108-38-3	80780.6	42163	36265	62036	100298	56791	0.553967	0.365136	1.37634	0.460836	insig
XMW0276	GC-MS	C7H12O	4-Hexen-3-one, 5-methyl-	Ketone	-	13905-10-7	904041	761517	772970	70293.5	64853.2	55021.5	1.10186	0.00344272	0.0779848	-3.68066	down
XMW0484	GC-MS	C7H10O	Furan, 2-propyl-	Heterocyclic compound	-	4229-91-8	14077.8	17223.8	23973.8	2277.55	1887.18	2306.61	1.09134	0.0304946	0.117075	-3.0945	down
XMW1118	GC-MS	C7H12O	CyclohexanecarboxAldehyde	Aldehyde	-	2043-61-0	15484.3	7589.35	11492.4	96767.2	109479	100593	1.08563	0.000135288	8.87689	3.15006	up
XMW1310	GC-MS	C9H18O2	Isobutyl isovalerate	Ester	-	589-59-3	374819	481688	400533	19615.6	17264.5	8262.02	1.08958	0.00583996	0.0359115	-4.79941	down
WMW0126	GC-MS	C9H16	1,3-Hexadiene, 3-ethyl-2-methyl-	Hydrocarbons	-	61142-36-7	51405.1	50048.6	39909.2	187856	45429.2	47093.1	0.480711	0.429846	1.9834	0.987972	insig
KMW0244	GC-MS	C8H12N2	Pyrazine, 2-methyl-5-(1-methylethyl)-	Heterocyclic compound	-	13925-05-8	30360.9	25073.1	21982.7	35299.8	9979.2	15204.4	0.48838	0.547176	0.781271	-0.356105	insig
KMW0261	GC-MS	C7H8O	p-Cresol	Phenol	-	106-44-5	9.42508e+06	8.01428e+06	8.0067e+06	577525	482593	406312	1.10102	0.00318046	0.057629	-4.11706	down
w32	GC-MS	C9H18O2	Acetic acid, heptyl ester	Ester	-	112-06-1	9	9	9	75893.5	75309.3	130159	1.10388	0.0356131	10420.8	13.3472	up
WMW0100	GC-MS	C9H18O	3-Nonen-1-ol, (E)-	Alcohol	-	10339-61-4	220162	231407	248603	137192	133965	82775	0.9962	0.0111781	0.505493	-0.984236	insig
XMW1385	GC-MS	C6H7N3	3-Imidazol-1-ylpropanenitrile	Heterocyclic compound	-	23996-53-4	1.18798e+06	1.39722e+06	1.47353e+06	812207	897310	941207	1.03767	0.0185138	0.653093	-0.614641	insig
WMW0061	GC-MS	C9H10O	BenzAldehyde, 2-ethyl-	Aldehyde	-	22927-13-5	9	9	9	303260	218737	49759.5	1.09802	0.124894	21176.2	14.3702	up
XMW1409	GC-MS	C9H13N	(R)-(+)-1-(p-Tolyl)ethylAmine	Amine	-	4187-38-6	1.25688e+07	1.6885e+07	1.41935e+07	6556.98	5266.66	5634.37	1.10438	0.00740643	0.00039998	-11.2878	down
D280	GC-MS	C3H6OS	Mercaptoacetone	Ketone	-	24653-75-6	133468	114516	145730	9	9	9	1.10473	0.00475283	6.85777e-05	-13.8319	down
NMW0756	GC-MS	C4H10O2	1,3-Butanediol	Alcohol	-	107-88-0	365624	513698	478282	22956.8	19240.4	22946	1.10146	0.0105224	0.0479839	-4.38131	down
D373	GC-MS	C7H12O	2,4-Heptadien-1-ol, (E,E)-	Alcohol	-	33467-79-7	579399	722153	610102	5025.49	4021.06	2592.45	1.10106	0.00465044	0.00608845	-7.35971	down
NMW0033	GC-MS	C5H5NO	2(1H)-Pyridinone	Heterocyclic compound	-	142-08-5	2.60257e+06	2.36642e+06	2.42239e+06	1.91659e+06	2.08077e+06	1.99051e+06	1.04192	0.00806338	0.810116	-0.3038	insig
WMW0005	GC-MS	C10H14O	Pinocarvone	Terpenoids	-	30460-92-5	11542.6	16054.9	14957.1	18464.4	21733.4	23639.3	0.944698	0.0255528	1.50012	0.585082	insig
D76	GC-MS	C10H22O2	Octanal dimethyl acetal	Ether	-	10022-28-3	26839.3	36991.1	26647.9	1.37349e+06	917927	209655	1.03431	0.140957	27.6428	4.78883	up
XMW0727	GC-MS	C9H10O	BenzAldehyde, 2,5-dimethyl-	Aldehyde	-	5779-94-2	92116	115213	97352.1	58530.8	60762.6	41275.5	1.01351	0.00700991	0.527007	-0.924106	insig
KMW0449	GC-MS	C11H18O2	Bicyclo[2.2.1]heptan-2-ol, 1,7,7-trimethyl-, formate, endo-	Ester	-	7492-41-3	476826	547775	505474	855.764	5087.55	1029.99	1.08394	0.00157679	0.00455749	-7.77754	down
WMW0222	GC-MS	C12H24	1-Dodecene	Hydrocarbons	-	112-41-4	1.52481e+06	1.55841e+06	1.44748e+06	710202	745461	740404	1.10195	0.000682057	0.484707	-1.04481	down
D95	GC-MS	C3H4Cl2	1-Propene, 1,3-dichloro-, (E)-	Halogenated hydrocarbons	-	10061-02-6	8247.48	7140.66	9248.77	9	9	9	1.10458	0.00546289	0.00109592	-9.83365	down
KMW0061	GC-MS	C6H12O2	Isobutyl acetate	Ester	-	110-19-0	1.07898e+06	1.08305e+06	1.09294e+06	1.27796e+06	1.32768e+06	1.30203e+06	1.09568	0.00242883	1.20053	0.26367	insig
KMW0078	GC-MS	C9H16O	8-Nonen-2-one	Ketone	-	5009-32-5	6.40954e+06	5.41201e+06	5.39432e+06	434703	378107	319915	1.10131	0.00362009	0.0657954	-3.92587	down
WMW0185	GC-MS	C8H8	1,3,5,7-Cyclooctatetraene	Ester	-	629-20-9	7957.03	13128.4	13907.2	7969.63	7820.52	5685.89	0.826112	0.123753	0.61373	-0.704323	insig
XMW0718	GC-MS	C7H12O4	Butanedioic acid, methyl-, dimethyl ester	Ester	-	1604-11-1	85182.9	74324.5	78820.3	1608.99	2382.53	1779.71	1.10247	0.00156524	0.0242155	-5.36792	down
D335	GC-MS	C8H12N2	Pyrazine, (2-methylpropyl)-	Heterocyclic compound	-	29460-92-2	110643	94256.5	94528.9	20479	25852.2	28439.8	1.09153	0.00167836	0.249712	-2.00166	down
XMW0917	GC-MS	C9H16O	3-Nonen-5-one	Ketone	-	82456-34-6	3822.87	3911.5	3789.46	8832.14	10120.3	6827.28	1.06103	0.0381581	2.23708	1.16162	up
XMW1337	GC-MS	C13H28	Nonane, 3-methyl-5-propyl-	Hydrocarbons	-	31081-18-2	3.85398e+06	4.47428e+06	3.91858e+06	117244	141993	135414	1.10389	0.0024451	0.0322248	-4.95569	down
XMW0026	GC-MS	C7H14O2	Heptanoic Acid	Acid	-	111-14-8	1.67539e+06	1.41203e+06	1.40936e+06	114083	100231	80307.6	1.10051	0.0035991	0.0655184	-3.93196	down
D197	GC-MS	C10H16O	3-Oxatricyclo[4.1.1.0(2,4)]octane, 2,7,7-trimethyl-	Terpenoids	-	1686-14-2	2.68214e+06	2.03755e+06	2.51272e+06	643653	687715	673397	1.09521	0.0117539	0.277192	-1.85104	down
KMW0280	GC-MS	C8H12O	3,5-Octadien-2-one	Ketone	-	38284-27-4	41206.9	34255	33694	137330	97995.4	110663	1.08271	0.0175122	3.16967	1.66433	up
XMW0658	GC-MS	C7H12O2	2-Heptenoic Acid	Acid	-	18999-28-5	1.4646e+08	1.26446e+08	1.24742e+08	1.17282e+07	1.0061e+07	8.1471e+06	1.10004	0.00271307	0.0752833	-3.73153	down
w37	GC-MS	C10H16O	2-Cyclohexene-1-carboxaldehyde, 2,6,6-trimethyl-	Aldehyde	-	432-24-6	25272.1	18091.4	26169.6	15548	18080.2	9993.76	0.826953	0.0693132	0.627356	-0.672644	insig
WMW0042	GC-MS	C10H16O	Bicyclo[3.1.1]heptan-3-ol, 6,6-dimethyl-2-methylene-	Terpenoids	-	5947-36-4	248750	261744	288525	139223	150383	86390.2	1.00345	0.00682069	0.470572	-1.08751	down
KMW0366	GC-MS	C10H18O2	Butanoic acid, 3-hexenyl ester, (Z)-	Ester	-	16491-36-4	1.55127e+06	1.81833e+06	1.59548e+06	134891	140938	110034	1.10193	0.00262776	0.0777154	-3.68566	down
D134	GC-MS	C7H12O5	Glycerol 1,2-diacetate	Ester	-	102-62-5	3.84787e+07	4.44929e+07	3.97915e+07	32285.5	32220.2	15488	1.10216	0.00198703	0.00065161	-10.5837	down
XMW1332	GC-MS	C8H14O2	2,2'-Bifuran, octahydro-	Heterocyclic compound	-	1592-33-2	3.03831e+07	2.55381e+07	2.56167e+07	1.9609e+06	1.64225e+06	1.41039e+06	1.1011	0.00364202	0.0614873	-4.02357	down
XMW1114	GC-MS	C8H16	1-Octene	Hydrocarbons	-	111-66-0	115692	142738	163670	19033.2	17444.3	16626.9	1.09873	0.0123426	0.12581	-2.99068	down
KMW0102	GC-MS	C6H14O	1-Hexanol	Alcohol	-	111-27-3	318024	322945	313370	362177	402716	391106	1.04399	0.0257782	1.21131	0.276568	insig
XMW0483	GC-MS	C5H5NO	1H-Pyrrole-2-carboxAldehyde	Heterocyclic compound	-	1003-29-8	11469.3	7424.86	8543.38	685140	549109	599027	1.10238	0.004299	66.8164	6.06213	up
XMW1235	GC-MS	C8H17NO	N,N-Dimethylhexanamide	Amine	-	5830-30-8	14925.1	11941.4	18569	18906.2	27740.6	15803.2	0.652406	0.254863	1.37447	0.458878	insig
XMW1208	GC-MS	CH2N4	1H-Tetrazole	Heterocyclic compound	-	288-94-8	3167.83	2472.87	2713.5	22210	38104.6	53453.7	1.08101	0.0599503	13.6181	3.76745	up
NMW0034	GC-MS	C10H16O	Fenchone	Terpenoids	-	1195-79-5	2.16659e+07	1.51299e+07	2.03136e+07	1.27521e+06	1.45074e+06	1.12768e+06	1.09946	0.0122165	0.067478	-3.88944	down
XMW0529	GC-MS	C10H17Cl	Bicyclo[2.2.1]heptane, 2-chloro-1,7,7-trimethyl-, (1R-endo)-	Terpenoids	-	30462-53-4	4258.09	5102.66	4526.48	312359	346471	177076	1.09894	0.0338353	60.1924	5.91151	up
KMW0338	GC-MS	C9H16O	2-Nonenal, (E)-	Aldehyde	-	18829-56-6	589124	866407	543350	2.35837e+06	2.5925e+06	2.64386e+06	1.07921	0.000172715	3.79949	1.92581	up
XMW0913	GC-MS	C10H16O	cis-Chrysanthenol	Terpenoids	-	55722-60-6	52224	67626.5	49037.8	204358	231892	222510	1.09195	0.000158474	3.90057	1.96368	up
D112	GC-MS	C9H10O2	Benzeneacetic acid, methyl ester	Ester	-	101-41-7	9	9	9	287201	216795	53970.8	1.09897	0.114673	20665.4	14.3349	up
XMW0602	GC-MS	C13H28	Undecane, 5,7-dimethyl-	Hydrocarbons	-	17312-83-3	7.18059e+07	8.43222e+07	7.35594e+07	822400	706680	468814	1.10164	0.00263177	0.00869831	-6.84505	down
XMW0089	GC-MS	C10H18O	4-Decenal, (E)-	Aldehyde	-	65405-70-1	1.41252e+07	1.6804e+07	1.45694e+07	172617	168827	119870	1.10294	0.00302436	0.0101391	-6.62393	down
KMW0425	GC-MS	C7H5NS	Benzothiazole	Heterocyclic compound	-	95-16-9	52266.9	45423.9	35976.7	243310	282136	161690	1.07358	0.033148	5.14064	2.36195	up
KMW0035	GC-MS	C4H8O2	Butanoic Acid	Acid	-	107-92-6	258703	348234	285828	9	9	9	1.10469	0.0078407	3.02431e-05	-15.013	down
XMW1284	GC-MS	C7H16O2	1-(1-ethoxyethoxy)-Propane	Ether	-	20680-10-8	12310.4	27440.5	13866.4	6305.37	12411.4	11963.5	0.695111	0.24858	0.57221	-0.805384	insig
KMW0088	GC-MS	C6H10O	2-Hexenal, (E)-	Aldehyde	-	6728-26-3	1.34588e+06	1.34102e+06	1.22561e+06	287670	175983	116159	1.06654	9.48801e-05	0.148194	-2.75444	down
XMW0201	GC-MS	C6H10O	4-Hexen-3-one	Ketone	-	2497-21-4	297072	331170	289171	90938.6	76080.8	49622.8	1.07092	0.000193754	0.236145	-2.08226	down
XMW0671	GC-MS	C5H10N2	1,7-Diazabicyclo[2.2.0]heptane	Heterocyclic compound	-	279-42-5	35276	28184.9	37810.3	3880	3523.37	1998.78	1.08554	0.00693491	0.0928413	-3.42909	down
XMW0403	GC-MS	C11H24	Nonane, 2,5-dimethyl-	Hydrocarbons	-	17302-27-1	33454.6	32770.9	29906	46553.6	46539.9	43679.6	1.07744	0.000783878	1.42277	0.508705	insig
KMW0323	GC-MS	C7H8O	Benzyl Alcohol	Alcohol	-	100-51-6	68311.4	62887.1	58387.8	199024	213934	227668	1.0994	0.00123085	3.37907	1.75663	up
WMW0127	GC-MS	C8H16O	3-Octen-1-ol, (Z)-	Alcohol	-	20125-84-2	19636.5	32568.3	39494.1	19294.8	13513.6	17946.6	0.84759	0.134263	0.553496	-0.853355	insig
WMW0087	GC-MS	C9H18O2	Butanoic Acid, 3-methylbutyl ester	Ester	-	106-27-4	69675.4	78270.2	62109.3	109107	99947.9	108516	1.0437	0.00510185	1.51185	0.596313	insig
KMW0251	GC-MS	C9H16O	5-Heptenal, 2,6-dimethyl-	Aldehyde	-	106-72-9	9.13105e+06	8.27388e+06	8.39902e+06	9.68533e+06	1.08082e+07	1.05685e+07	0.991407	0.017413	1.20377	0.26756	insig
XMW0443	GC-MS	C10H18O2	(E)-2,6-Dimethylocta-3,7-diene-2,6-diol	Alcohol	-	51276-34-7	1.55076e+06	1.81369e+06	1.58879e+06	134871	130772	110053	1.10258	0.00268194	0.0758487	-3.72073	down
KMW0199	GC-MS	C10H16	.beta.-Myrcene	Terpenoids	-	123-35-3	10233.8	9492.64	8288.58	34542.2	35251.6	39358.5	1.09829	0.00108545	3.89621	1.96207	up
XMW0430	GC-MS	C5H10N2	2-Piperidinimine	Heterocyclic compound	-	22780-54-7	537018	202013	750272	836611	872308	793570	0.704833	0.16612	1.68031	0.748726	insig
XMW1308	GC-MS	C10H17F3O2	1-Octyl trifluoroacetate	Ester	-	2561-21-9	115361	119612	112647	26218.4	26809.7	29982.3	1.10284	2.40757e-05	0.238797	-2.06614	down
D210	GC-MS	C6H5NO2	Benzene, nitro-	Aromatics	-	98-95-3	4.02184e+06	3.39577e+06	3.40134e+06	258962	223336	186585	1.10116	0.00347463	0.0618251	-4.01566	down
D240	GC-MS	C10H20O2	Propanoic acid, 2,2-dimethyl-, pentyl ester	Ester	-	2313-68-0	782667	746706	572343	70933.3	63533	65644.7	1.10049	0.0102706	0.0952131	-3.3927	down
XMW0073	GC-MS	C10H20O2	3-Methylheptyl acetate	Ester	-	72218-58-7	4630.41	6526.28	6147.32	6993.28	7867.87	8820.41	0.86867	0.0538535	1.36856	0.452658	insig
KMW0328	GC-MS	C10H16O	(+)-(E)-Limonene oxide	Terpenoids	-	6909-30-4	95116	80616	78062	87034.5	100119	67009.2	0.0323828	0.991761	1.00145	0.00209404	insig
XMW1156	GC-MS	C9H13N	Cyclopentanecarbonitrile, 3-(1-methylethylidene)-	Nitrogen compounds	-	89683-72-7	501080	705429	441905	1.9026e+06	2.10798e+06	2.09573e+06	1.0798	0.000170026	3.70436	1.88922	up
XMW0269	GC-MS	C10H18O3	2-Methylbutanoic anhydride	Others	-	1468-39-9	2.55647e+07	3.02715e+07	2.62722e+07	424413	446998	354059	1.10379	0.00293228	0.014925	-6.06612	down
NMW0075	GC-MS	C10H18O	Cyclohexanol, 1-methyl-4-(1-methylethylidene)-	Terpenoids	-	586-81-2	532649	624988	545420	39149.5	41437.4	36006.4	1.10351	0.0029007	0.0684612	-3.86857	down
WMW0105	GC-MS	C11H20	1,7-Nonadiene, 4,8-dimethyl-	Hydrocarbons	-	62108-28-5	18145.4	14185	15311.8	78772.2	38885.4	27826.5	0.942801	0.168854	3.05368	1.61055	insig
WMW0205	GC-MS	C8H14O2	2,5-Octanedione	Ketone	-	3214-41-3	45606.4	70996.9	76457.5	5572.39	4012.14	6835.92	1.08724	0.0243807	0.0850532	-3.55549	down
XMW1115	GC-MS	C6H10O	Isopropenyl ethyl ketone	Ketone	-	25044-01-3	4319.58	3587.14	3000.89	9	9	9	1.10414	0.0108814	0.00247534	-8.65816	down
WMW0193	GC-MS	C8H18	Hexane, 2,3-dimethyl-	Hydrocarbons	-	584-94-1	691713	793169	792858	9	9	9	1.10481	0.00197218	1.18539e-05	-16.3643	down
KMW0137	GC-MS	C9H20	Nonane	Hydrocarbons	-	111-84-2	7693.19	7563.73	6101.97	3673.64	2013.86	3962.19	0.969897	0.00853303	0.451788	-1.14628	insig
D206	GC-MS	C6H8O2	1,2-Cyclohexanedione	Ketone	-	765-87-7	189381	154089	160519	184867	209466	203059	0.841157	0.0853528	1.18533	0.245287	insig
KMW0254	GC-MS	C10H16O	1,5-Heptadien-4-one, 3,3,6-trimethyl-	Terpenoids	-	546-49-6	636739	578161	596735	643893	724602	701635	0.912191	0.0489615	1.14269	0.192429	insig
XMW0412	GC-MS	C8H10O2	3-Acetyl-2,5-dimethyl furan	Heterocyclic compound	-	10599-70-9	309770	277766	287770	227227	248755	238370	1.02325	0.012817	0.816117	-0.293152	insig
KMW0306	GC-MS	C11H24	Undecane	Hydrocarbons	-	1120-21-4	222829	199659	186710	195788	211860	203866	0.0580135	0.951233	1.0038	0.00547399	insig
WMW0221	GC-MS	C10H16O	Bicyclo[3.1.0]hexan-3-one, 4-methyl-1-(1-methylethyl)-	Terpenoids	-	1125-12-8	399943	359954	396615	354792	391778	392488	0.176604	0.760995	0.984908	-0.0219387	insig
KMW0329	GC-MS	C10H16O	Camphor	Terpenoids	-	76-22-2	78794.4	64824.6	75677.7	56949.7	61335.1	37604.6	0.816175	0.0816235	0.71086	-0.492362	insig
KMW0340	GC-MS	C10H20O2	2-Octanol, acetate	Ester	-	2051-50-5	14605.7	8611.34	15638.2	13954.3	18839.7	5832.62	0.112414	0.987151	0.994117	-0.00851215	insig
XMW0711	GC-MS	C7H7NO	Formamide, N-phenyl-	Amine	-	103-70-8	27905.8	29682.3	27421.8	9	9	9	1.10482	0.000587993	0.00031761	-11.6205	down
KMW0405	GC-MS	C4H8O2	Propanoic Acid, 2-methyl-	Acid	-	79-31-2	1.99541e+07	2.48909e+07	2.45615e+07	9	9	9	1.10479	0.00471085	3.89013e-07	-21.2937	down
KMW0479	GC-MS	C10H14O	1,3-Cyclohexadiene-1-carboxaldehyde, 2,6,6-trimethyl-	Terpenoids	-	116-26-7	424330	498009	433267	9	9	9	1.10479	0.00262889	1.99173e-05	-15.6156	down
KMW0208	GC-MS	C10H22	Decane	Hydrocarbons	-	124-18-5	33723.5	36190.5	30874.6	37834.1	35926.1	36181	0.74507	0.175524	1.09081	0.1254	insig
w43	GC-MS	C6H10O2	2-Oxepanone	Ester	-	502-44-3	150890	128235	134977	133882	149851	142769	0.282024	0.642003	1.02994	0.0425654	insig
NMW0025	GC-MS	C8H8O2	Acetic acid, phenyl ester	Ester	-	122-79-2	57401.7	52042.7	52466.3	1.42039e+06	1.46172e+06	1.27872e+06	1.10436	0.00170851	25.6983	4.6836	up
D84	GC-MS	C9H20O2	Heptane, 1,1-dimethoxy-	Hydrocarbons	-	10032-05-0	10084.8	13824.3	12868.5	14696	11690.7	11921.3	0.200934	0.748051	1.04162	0.0588223	insig
XMW0895	GC-MS	C10H12	Indan, 1-methyl-	Aromatics	-	767-58-8	896621	762764	760464	51719.2	47234.7	39285.9	1.10208	0.00331315	0.0571274	-4.12967	down
XMW1286	GC-MS	C4H6N2O	1H-Imidazole-4-methanol	Heterocyclic compound	-	822-55-9	7.02795e+06	5.77186e+06	6.00099e+06	479316	421397	337719	1.10041	0.00398338	0.0658712	-3.92421	down
KMW0266	GC-MS	C5H6S2	2-Thiophenemethanethiol	Heterocyclic compound	-	6258-63-5	9	9	9	12001.5	10798.6	14326	1.10451	0.00693571	1375.04	10.4253	up
XMW0445	GC-MS	C7H10O2	6-Ethyl-5,6-dihydro-2H-pyran-2-one	Heterocyclic compound	-	19895-35-3	675458	756905	714775	953103	1.05925e+06	1.0528e+06	1.06694	0.00290927	1.42756	0.513548	insig
NMW0036	GC-MS	C6H9NO	1-ethenyl-2-Pyrrolidinone	Heterocyclic compound	-	88-12-0	744625	649579	675536	507850	538192	525265	1.05226	0.0203185	0.759181	-0.397485	insig
KMW0267	GC-MS	C8H8O2	Benzoic acid, methyl ester	Ester	-	93-58-3	1.25005e+07	8.53331e+06	1.16788e+07	639924	726490	496976	1.09768	0.0133342	0.0569623	-4.13385	down
WMW0194	GC-MS	C10H16O	Thujone	Terpenoids	-	546-80-5	498846	443259	453283	362590	399076	368545	1.00949	0.0170311	0.809962	-0.304075	insig
NMW0037	GC-MS	C10H20O2	Butanoic acid, 3-methyl-, 3-methylbutyl ester	Ester	-	659-70-1	1.05193e+06	609019	920713	22548.8	28724.9	24175.5	1.09916	0.0238212	0.029225	-5.09665	down
D94	GC-MS	C7H8S	Benzenemethanethiol	Sulfur compounds	-	100-53-8	525930	441593	445145	12695.9	14678.3	11614.6	1.10343	0.00356866	0.0275995	-5.17922	down
XMW0726	GC-MS	C10H14O	Benzene, (1-methoxypropyl)-	Aromatics	-	59588-12-4	104537	87844.8	98310.6	2321.03	2034.67	814.551	1.09019	0.00242155	0.017786	-5.81312	down
XMW0418	GC-MS	C12H26	Decane, 2,4-dimethyl-	Hydrocarbons	-	2801-84-5	1.09694e+06	771030	960068	124056	117963	225117	1.07185	0.00777791	0.16518	-2.59789	down
D272	GC-MS	C10H20O2	Butanoic acid, 3-methyl-, 2-methylbutyl ester	Ester	-	2445-77-4	1.02157e+06	684670	965630	57899.8	53719.4	111309	1.08211	0.0137518	0.0834353	-3.5832	down
WMW0024	GC-MS	C10H14O	Verbenone	Terpenoids	-	80-57-9	35685.7	44113.9	36885.2	6238.15	4465.13	4256.62	1.09484	0.00414296	0.128208	-2.96344	down
XMW0300	GC-MS	C8H10O	Phenol, 3,5-dimethyl-	Phenol	-	108-68-9	1.18219e+06	1.55119e+06	1.30865e+06	10305.4	19993.4	9	0.901311	0.00637255	0.00749816	-7.05925	insig
D370	GC-MS	C10H16O	(Z)-2,2-Dimethyl-3-(3-methylpenta-2,4-dien-1-yl)oxirane	Terpenoids	-	33281-83-3	258893	122928	294543	6076.36	4457.35	4123.4	1.09128	0.0518432	0.0216704	-5.52813	down
XMW0941	GC-MS	C11H16	exo-7-(trans-1-Propenyl)bicyclo[4.2.0]oct-1(2)-ene	Hydrocarbons	-	107983-42-6	168378	173927	193923	131676	132994	64231.4	0.816643	0.0804019	0.613361	-0.705191	insig
D329	GC-MS	C10H16O	Myroxide	Terpenoids	-	28977-57-3	8.25021e+06	8.59663e+06	9.44477e+06	4.4738e+06	4.74652e+06	2.91176e+06	1.02472	0.00414051	0.461443	-1.11578	down
XMW0373	GC-MS	C12H26	Undecane, 2-methyl-	Hydrocarbons	-	7045-71-8	75039.2	131398	94257.9	359924	396429	406274	1.07361	0.00021971	3.86646	1.95101	up
XMW0775	GC-MS	C12H24	1-Undecene, 9-methyl-	Hydrocarbons	-	74630-41-4	13599.4	16648.1	14292.6	3074.79	2221.05	1930.44	1.08971	0.00231405	0.162242	-2.62378	down
QWM0003	GC-MS	C10H16O	2H-Pyran, 3,6-dihydro-4-methyl-2-(2-methyl-1-propenyl)-	Terpenoids	-	1786-08-9	43156.2	50167.4	41031.2	1753.26	838.003	297.556	1.06992	0.00331152	0.0215014	-5.53943	down
XMW0170	GC-MS	C9H10O	BenzAldehyde, 3-ethyl-	Aldehyde	-	34246-54-3	6053.48	5271.26	4956.5	16448.4	24050.7	24076.8	1.08184	0.0224784	3.96628	1.98779	up
KMW0357	GC-MS	C10H18O	Bicyclo[2.2.1]heptan-2-ol, 2,3,3-trimethyl-	Terpenoids	-	465-31-6	144713	203823	157360	34843.3	22227.3	5419.44	0.991527	0.00595281	0.123524	-3.01714	insig
KMW0359	GC-MS	C8H10O	Phenol, 3-ethyl-	Phenol	-	620-17-7	18439.3	7396.81	21279.3	204845	237370	215287	1.07312	0.000501822	13.9551	3.80272	up
D276	GC-MS	C10H14O	Bicyclo[3.1.0]hex-3-en-2-one, 4-methyl-1-(1-methylethyl)-	Terpenoids	-	24545-81-1	4844.24	6811.95	4991.01	264195	196364	61286.1	1.06501	0.105855	31.3473	4.97027	up
KMW0370	GC-MS	C11H20O	2-Methylisoborneol	Terpenoids	-	2371-42-8	2.06371e+06	1.97681e+06	1.96193e+06	1.2448e+06	1.34795e+06	1.35223e+06	1.09312	0.000140795	0.657228	-0.605535	insig
D263	GC-MS	C7H14S2	(E)-sec-Butyl propenyl diSulfur compounds	Sulfur compounds	-	24351-71-1	27956.6	32220	25275.6	2.55612e+06	1.87781e+06	398627	1.05726	0.130948	56.5527	5.82152	up
XMW0296	GC-MS	C10H20O2	Acetic acid, octyl ester	Ester	-	112-14-1	15820.4	13891.8	12929.9	15156.7	17971.2	14070.5	0.520981	0.356047	1.10685	0.146462	insig
XMW0367	GC-MS	C13H28	Undecane, 2,4-dimethyl-	Hydrocarbons	-	17312-80-0	283214	303255	256786	20007.9	16532.2	6978.07	1.0796	0.00130191	0.0516073	-4.27628	down
XMW0663	GC-MS	C9H16N2	3,5-Dimethyl-1-butylpyrazole	Heterocyclic compound	-	2655-37-0	7.27689e+06	8.61515e+06	7.45259e+06	160943	176364	115046	1.10192	0.00296795	0.0193772	-5.6895	down
KMW0383	GC-MS	C7H10O3	2(5H)-Furanone, 5-ethyl-3-hydroxy-4-methyl-	Heterocyclic compound	-	698-10-2	1.60217e+08	1.87657e+08	1.64298e+08	4.66772e+06	4.64287e+06	4.28112e+06	1.10426	0.00263041	0.0265374	-5.23583	down
XMW1084	GC-MS	C10H16O2	2-Butenoic acid, 3-hexenyl ester, (E,Z)-	Ester	-	65405-80-3	5.56325e+06	6.5566e+06	5.80033e+06	44075.5	50958.8	56600.6	1.1042	0.0025446	0.00846168	-6.88484	down
KMW0395	GC-MS	C10H12O	Estragole	Aromatics	-	140-67-0	672277	791255	686729	22414.5	21081.1	16070.6	1.10243	0.00281928	0.0277018	-5.17387	down
NMW0087	GC-MS	C10H16O2	2-Oxabicyclo[2.2.2]octan-6-one, 1,3,3-trimethyl-	Terpenoids	-	107598-08-3	82933.1	150322	153657	8587.01	6973.6	9224.08	1.0909	0.0344558	0.0640578	-3.96448	down
D186	GC-MS	C10H16O	trans-Carveol	Terpenoids	-	1197-07-5	5.63059e+06	6.28631e+06	5.67003e+06	9	9	9	1.10482	0.00130897	1.53523e-06	-19.3131	down
NMW0089	GC-MS	C10H20O	6-Octen-1-ol, 3,7-dimethyl-, (R)-	Terpenoids	-	1117-61-9	3.53073e+07	3.95825e+07	3.45811e+07	14078.2	25157.1	9947.4	1.10204	0.00182473	0.000449276	-11.1201	down
XMW0929	GC-MS	C10H10O	Benzofuran, 4,7-dimethyl-	Heterocyclic compound	-	28715-26-6	4.18625e+07	4.82262e+07	4.2472e+07	180398	193270	86666.8	1.10004	0.00210791	0.00347264	-8.16975	down
XMW0931	GC-MS	C10H12O	8,9-Dehydrothymol	Phenol	-	18612-99-2	1.12422e+06	1.28665e+06	1.16354e+06	22368.2	27943.9	17089	1.1017	0.00168316	0.0188566	-5.72878	down
XMW1158	GC-MS	C10H15NO2	Tricyclo[3.3.1.1(3,7)]decane, 2-nitro-	Nitrogen compounds	-	54564-31-7	9	9	9	20596.8	21912.4	31935.8	1.10407	0.020206	2757.22	11.429	up
XMW0371	GC-MS	C13H28	Nonane, 5-methyl-5-propyl-	Hydrocarbons	-	17312-75-3	2.12183e+06	3.31936e+06	1.57953e+06	34291.9	72344.3	20719.9	1.0818	0.0464522	0.01814	-5.78468	down
KMW0430	GC-MS	C10H20O	Citronellol	Terpenoids	-	106-22-9	344254	379587	215150	16575	15509	10087.5	1.09202	0.0266661	0.0449115	-4.47677	down
XMW0597	GC-MS	C10H22	Nonane, 2-methyl-	Hydrocarbons	-	871-83-0	6214.06	4424.22	4390.21	4805.13	1562.24	6731.77	0.335226	0.72211	0.87162	-0.198228	insig
XMW0883	GC-MS	C9H16	1,5-Heptadiene, 2,6-dimethyl-	Hydrocarbons	-	6709-39-3	258062	287398	256984	71658.6	60489.2	40063.6	1.07708	0.00010617	0.214608	-2.22022	down
KMW0097	GC-MS	C5H6OS	2-Methyl-3-furanthiol	Heterocyclic compound	-	28588-74-1	2.46263e+06	2.45569e+06	2.29612e+06	3.02442e+06	2.87214e+06	3.31959e+06	1.02695	0.0236778	1.27746	0.353279	insig
XMW1116	GC-MS	C6H12O	4-Hexen-1-ol, (E)-	Alcohol	-	928-92-7	27581.3	23475.6	32385.6	2110.74	1541.76	922.919	1.08776	0.00854887	0.0548331	-4.18881	down
D363	GC-MS	C8H16O2	Butanoic acid, 3-methyl-, 1-methylethyl ester	Ester	-	32665-23-9	15890.8	12212.3	15510	9	9	9	1.10456	0.00639973	0.00061908	-10.6576	down
XMW1388	GC-MS	C4H8N2	1H-Imidazole, 4,5-dihydro-2-methyl-	Heterocyclic compound	-	534-26-9	38440.2	25518.2	33662.8	50597.9	51081.4	36184.3	0.800601	0.0998872	1.41223	0.497975	insig
KMW0148	GC-MS	C10H16	.alpha.-Pinene	Terpenoids	-	80-56-8	15296.1	18176	16391.4	9	9	9	1.10474	0.00254258	0.000541479	-10.8508	down
XMW0578	GC-MS	C8H16O	Furan, 2-butyltetrahydro-	Heterocyclic compound	-	1004-29-1	148941	186218	156001	9359	6276.32	3096.24	1.08341	0.00440919	0.0381373	-4.71265	down
XMW1471	GC-MS	C8H17N	1-ButanAmine, N-methyl-N-2-propenyl-	Amine	-	24209-62-9	33292.8	38213	33646.9	10085	4617.02	3818.52	1.04853	0.000427396	0.17613	-2.50529	down
XMW1120	GC-MS	C4H5NS	Thiocyanic acid, 2-propenyl ester	Others	-	764-49-8	7.23936e+06	5.01908e+06	6.69633e+06	1.15058e+06	1.44608e+06	1.297e+06	1.09038	0.0160318	0.205419	-2.28336	down
D229	GC-MS	C8H14O2	Allyl isovalerate	Ester	-	2835-39-4	67476.7	47167.9	62717.6	10458	11704.1	11246.5	1.09464	0.0156792	0.188363	-2.40841	down
XMW0656	GC-MS	C8H18O	3-Heptanol, 6-methyl-	Alcohol	-	18720-66-6	130321	93055.9	123063	20669.5	23935.2	20202.9	1.09417	0.0137137	0.187067	-2.41837	down
NMW0776	GC-MS	C4H4O2	2(5H)-Furanone	Heterocyclic compound	-	497-23-4	37680.7	26205.3	33772.9	54057	55100.6	38662	0.879792	0.0673636	1.51363	0.598013	insig
XMW1300	GC-MS	C9H18	Cyclopentane, butyl-	Hydrocarbons	-	2040-95-1	158877	91597.6	171091	15624.9	19316.1	13676.6	1.08178	0.0368061	0.115326	-3.11621	down
XMW1291	GC-MS	C8H16O2	1,3-Dioxolane, 4-methyl-2-(2-methylpropyl)-	Heterocyclic compound	-	18433-93-7	187175	102297	201946	21682.2	28136.5	19417.3	1.07171	0.0445077	0.14089	-2.82735	down
XMW0604	GC-MS	C11H24	Octane, 2,3,3-trimethyl-	Hydrocarbons	-	62016-30-2	19529.5	17346.3	25180	50019.2	66122.2	52732.9	1.06447	0.0088213	2.72133	1.44431	up
KMW0098	GC-MS	C6H12O	3-Hexen-1-ol, (Z)-	Alcohol	-	928-96-1	701849	797003	704965	186597	104843	70827.6	1.05667	0.000199578	0.164382	-2.60488	down
D357	GC-MS	C7H15NO2	2-Propanol, 1-(dimethylamino)-, acetate (ester)	Ester	-	32188-28-6	178366	164337	140603	168638	154040	177575	0.248999	0.689972	1.03507	0.0497233	insig
KMW0103	GC-MS	C7H16O	3-Heptanol	Alcohol	-	589-82-2	30566	29174	36312	1697.44	1915	1320	1.10064	0.00491314	0.0513517	-4.28344	down
KMW0096	GC-MS	C5H10O2	Butanoic Acid, 3-methyl-	Acid	-	503-74-2	299199	307586	293680	63192.6	35530.1	24648.4	1.06684	0.000700982	0.137008	-2.86766	down
KMW0113	GC-MS	C7H14O	2-Heptanone	Ketone	-	110-43-0	17277.9	14125.7	17739.4	9	9	9	1.10464	0.00477559	0.000549417	-10.8298	down
w30	GC-MS	C7H12O2	2-Buten-1-ol, 3-methyl-, acetate	Ester	-	1191-16-8	47820.5	29183.3	41830.4	6515.38	5983.98	7519.77	1.08686	0.0260422	0.168463	-2.5695	down
XMW0399	GC-MS	C4H7NO2	Diacetamide	Amine	-	625-77-4	532321	641057	536301	26942.9	27908.7	22699	1.10294	0.0041923	0.0453598	-4.46244	down
XMW1065	GC-MS	C11H24	Octane, 2,6,6-trimethyl-	Hydrocarbons	-	54166-32-4	5.11677e+06	5.94595e+06	5.16421e+06	303915	319636	252832	1.1028	0.00262552	0.0540079	-4.21069	down
XMW0444	GC-MS	C2H3N5	1,2,4,5-Tetrazin-3-Amine	Heterocyclic compound	-	79329-74-1	37868.8	11784.1	18011	149456	157713	139889	1.04555	0.0004215	6.60704	2.724	up
NMW0767	GC-MS	C6H10S	Diallyl Sulfur compounds	Sulfur compounds	-	592-88-1	3.85274e+06	4.27398e+06	3.77113e+06	928663	550584	378115	1.0647	0.000120755	0.156109	-2.67937	down
NMW0766	GC-MS	C7H12O2	2-Propenoic acid, butyl ester	Ester	-	141-32-2	45897.4	48308.1	43345	73534.1	58490.4	65094.1	1.02287	0.0344705	1.43306	0.519103	insig
XMW0145	GC-MS	C2H4N4	Dicyandiamide	Nitrogen compounds	-	461-58-5	455715	463844	437548	494563	489376	539949	0.938518	0.0554135	1.12289	0.167222	insig
KMW0104	GC-MS	C5H7NS	Thiazole, 2,4-dimethyl-	Heterocyclic compound	-	541-58-2	48147	45636	55201	3045	3291	1653	1.09198	0.00291146	0.0536232	-4.221	down
XMW1304	GC-MS	C7H14O2	1,3-Dioxane, 2,4,6-trimethyl-, (2.alpha.,4.alpha.,6.alpha.)-	Heterocyclic compound	-	19145-91-6	44050	39750.6	49451.9	2917	2296.56	1883.31	1.09951	0.0040743	0.0532589	-4.23083	down
NMW0772	GC-MS	C3H4N2	1H-Pyrazole	Heterocyclic compound	-	288-13-1	61160.9	54087.6	70261.8	2064.05	2102.51	1163.3	1.09714	0.00585147	0.0287308	-5.12126	down
KMW0112	GC-MS	C8H10	o-Xylene	Aromatics	-	95-47-6	21189.5	17156.5	14269.1	29661.6	58077	30233.9	0.92769	0.140393	2.24218	1.1649	insig
KMW0116	GC-MS	C6H6O2	Ethanone, 1-(2-furanyl)-	Heterocyclic compound	-	1192-62-7	9	9278.95	2277.98	469985	522670	250322	0.925371	0.0387574	107.469	6.74777	insig
XMW0884	GC-MS	C7H10O	5-Hexenal, 4-methylene-	Hydrocarbons	-	17844-21-2	28462.2	15901	20684.5	2342.37	2600.41	1673.75	1.0854	0.0329215	0.101718	-3.29735	down
XMW0307	GC-MS	C8H10	p-Xylene	Aromatics	-	106-42-3	90309	40615	34487	59308.1	99633.1	57848.5	0.477328	0.488861	1.31061	0.390241	insig
XMW1307	GC-MS	C7H14O	Cyclohexanol, 1-methyl-	Alcohol	-	590-67-0	993839	701561	909263	176997	212986	184968	1.09145	0.0149336	0.220739	-2.17958	down
KMW0129	GC-MS	C6H8O	2,4-Hexadienal, (E,E)-	Aldehyde	-	142-83-6	269707	206951	305014	39389.1	40677.4	50570.4	1.09201	0.0158788	0.167125	-2.581	down
WMW0186	GC-MS	C7H14O2	Acetic acid, pentyl ester	Ester	-	628-63-7	78282.8	55779.6	73916.2	15823.9	16314.1	13752.2	1.09149	0.014934	0.220649	-2.18018	down
NMW0777	GC-MS	C4H8S2	DiSulfur compounds, methyl 2-propenyl	Sulfur compounds	-	2179-58-0	2.20073e+07	1.53547e+07	2.08865e+07	3.99144e+06	4.89233e+06	4.27727e+06	1.08898	0.0169139	0.225947	-2.14595	down
XMW0240	GC-MS	C10H22	3-Ethyl-3-methylheptane	Hydrocarbons	-	17302-01-1	1.52042e+06	1.82806e+06	1.53743e+06	64134.4	67971.6	56028.9	1.10334	0.00400278	0.0385056	-4.69879	down
XMW0641	GC-MS	C10H22	Heptane, 3,3,4-trimethyl-	Hydrocarbons	-	20278-87-9	488397	341898	492218	48192.8	52216.2	36595.9	1.09359	0.0146774	0.103594	-3.27098	down
XMW0605	GC-MS	C10H22	Heptane, 3-ethyl-2-methyl-	Hydrocarbons	-	14676-29-0	193425	202782	198130	3364.41	5037.65	2072.85	1.09606	5.19933e-05	0.0176245	-5.82627	down
KMW0150	GC-MS	C9H12	Benzene, 1,2,4-trimethyl-	Aromatics	-	95-63-6	14472.1	24849.1	14403.9	11621.3	15547.8	14430.8	0.547489	0.366294	0.774311	-0.369015	insig
NMW0789	GC-MS	C9H12	Benzene, 1-ethyl-3-methyl-	Aromatics	-	620-14-4	1.27629e+07	1.40399e+07	1.19439e+07	429983	441787	335217	1.10288	0.00230621	0.0311507	-5.00459	down
D181	GC-MS	C3H8O3	Glycerin	Alcohol	-	56-81-5	12987.9	15934.9	16173.8	2088.93	1552.98	1408.71	1.09591	0.0044732	0.111996	-3.15849	down
XMW0642	GC-MS	C8H16O	Cyclohexanol, 3,5-dimethyl-	Alcohol	-	5441-52-1	26208	30555	28315.3	36529.2	33591.4	36021.8	1.00331	0.0130818	1.24759	0.319138	insig
KMW0162	GC-MS	C2H6S3	Dimethyl triSulfur compounds	Sulfur compounds	-	3658-80-8	1.46463e+06	1.36234e+06	1.93369e+06	2.90816e+06	3.68262e+06	2.556e+06	1.00282	0.0295798	1.92133	0.942102	insig
KMW0193	GC-MS	C10H16	.beta.-Pinene	Terpenoids	-	127-91-3	53704.3	48744.2	48201.1	56269.9	47850.9	58047.6	0.50735	0.361341	1.07646	0.106296	insig
XMW0299	GC-MS	C8H16O2	Butanoic acid, butyl ester	Ester	-	109-21-7	3587.42	5011.24	9773.11	22109.6	39341.1	30215.2	1.02325	0.0272763	4.98949	2.31889	up
XMW0306	GC-MS	C8H16O2	Heptanoic acid, methyl ester	Ester	-	106-73-0	20916.4	20954.7	24792.8	65941.7	50969.4	27676	0.891448	0.143085	2.1689	1.11696	insig
XMW0434	GC-MS	C8H14O2	4-Hexen-1-ol, acetate	Alcohol	-	72237-36-6	9	9	9	79675.3	132255	71720.3	1.10392	0.0380646	10505.6	13.3589	up
XMW0908	GC-MS	C2H4N2O2	1,2-HydrazinedicarboxAldehyde	Aldehyde	-	628-36-4	2978.89	2667.81	4175.3	2259.06	3796.76	3092.55	0.202468	0.743139	0.931417	-0.102502	insig
KMW0144	GC-MS	C7H14O2	Hexanoic acid, methyl ester	Ester	-	106-70-7	867.615	1146	991.832	35268.9	27576.4	26069.9	1.10212	0.00970669	29.5846	4.88678	up
WMW0103	GC-MS	C7H14O	2-Cyclopentylethanol	Alcohol	-	766-00-7	87034.8	106379	93277.9	22450.9	22585.8	12029	1.0678	0.000882428	0.199049	-2.3288	down
D269	GC-MS	C9H18O2	Butanoic acid, 2-methyl-, 2-methylpropyl ester	Ester	-	2445-67-2	24270.1	28284.6	27911.4	2134.39	1705.91	1776.54	1.10249	0.00240178	0.0698038	-3.84055	down
D417	GC-MS	C8H14O2	3-Hexen-1-ol, acetate, (E)-	Ester	-	3681-82-1	13198.5	16021	14238.6	10186	11890.3	9803.78	0.977651	0.0231798	0.733582	-0.446971	insig
KMW0205	GC-MS	C7H12O	Cyclohexene, 1-methoxy-	Aromatics	-	931-57-7	2763.08	3069.36	2334.89	25879.8	22747.6	4139.1	0.888621	0.159698	6.46068	2.69169	insig
KMW0211	GC-MS	C5H5NOS	2-Acetylthiazole	Heterocyclic compound	-	24295-03-2	9	9	9	68510.4	78456.2	31459.3	1.10266	0.0532447	6608.36	12.6901	up
XMW1124	GC-MS	C7H11NO	2-Azabicyclo[3.2.1]octan-3-one	Ketone	-	26396-67-8	19375	14620.8	14404.4	38490.2	52397.5	62843.1	1.05712	0.0326256	3.17624	1.66732	up
KMW0234	GC-MS	C10H14	p-Cymene	Aromatics	-	99-87-6	18664.2	13056.7	10255.8	26802.1	16425.4	15153.6	0.609145	0.294573	1.3908	0.475913	insig
KMW0219	GC-MS	C8H18O	1-Hexanol, 2-ethyl-	Alcohol	-	104-76-7	39387.3	39345.3	42861.4	49965.6	76476.7	46618.3	0.798318	0.209465	1.42327	0.509205	insig
WMW0215	GC-MS	C10H16	.beta.-Ocimene	Terpenoids	-	13877-91-3	68009.9	51431	53555.4	57308.3	73734.8	74268.8	0.635253	0.230827	1.1868	0.247076	insig
KMW0233	GC-MS	C8H8O	Acetophenone	Ketone	-	98-86-2	20960.3	17047.7	14773.4	93796.4	119469	63738.9	1.07086	0.0419064	5.24816	2.39181	up
XMW0126	GC-MS	C10H14	Benzene, 1-methyl-3-(1-methylethyl)-	Terpenoids	-	535-77-3	5972.84	7618.7	6731.2	6115.2	8054.95	5784.03	0.106765	0.893401	0.981864	-0.0264043	insig
D309	GC-MS	C8H14O2	Ethyl 2-hexenoate, trans-	Ester	-	27829-72-7	18216	19224.3	15068	26990.3	26628.2	27049.7	1.04602	0.0164715	1.53629	0.619455	insig
XMW0196	GC-MS	C11H24	Decane, 4-methyl-	Hydrocarbons	-	2847-72-5	81239.8	70378.9	72153.9	79360.8	89015	87119.8	0.841408	0.0785543	1.14176	0.191265	insig
KMW0247	GC-MS	C10H16	.beta.-Phellandrene	Terpenoids	-	555-10-2	53535.5	47240.2	35174.6	229820	49631.2	46110.8	0.535555	0.406894	2.39472	1.25985	insig
XMW1440	GC-MS	C8H10O3	2-methylprop-2-enoyl 2-methylprop-2-enoate	Others	-	760-93-0	10006.7	9218.22	7449.73	16398.1	18085.2	13041.1	1.00673	0.0254256	1.78163	0.833201	insig
XMW1203	GC-MS	C5H6O3	2,5-Furandione, dihydro-3-methyl-	Heterocyclic compound	-	4100-80-5	43903.8	43858.5	17190.4	5604.49	3411.69	4629.82	1.04284	0.0751271	0.13002	-2.94319	down
XMW0175	GC-MS	C9H16O	2-Nonen-4-one	Ketone	-	32064-72-5	46110.5	26342.6	52856.3	21716.3	26435.1	13102.8	0.847133	0.0977188	0.488824	-1.03261	insig
NMW0022	GC-MS	C8H10O	Benzenemethanol, .alpha.-methyl-	Alcohol	-	98-85-1	25263.9	19128.9	20338.8	30398.8	29677	32771	0.992849	0.0218331	1.43434	0.520383	insig
NMW0023	GC-MS	C8H8O	BenzAldehyde, 2-methyl-	Aldehyde	-	529-20-4	18083.4	19573.9	16439.9	45133.4	21080.8	21559.9	0.704552	0.292301	1.62253	0.698245	insig
XMW0767	GC-MS	C9H16O2	2-Furanmethanol, 5-ethenyltetrahydro-.alpha.,5-dimethyl-	Heterocyclic compound	-	104188-13-8	1.34105e+06	1.21379e+06	1.25018e+06	1.46727e+06	1.64246e+06	1.60416e+06	1.01653	0.0123666	1.23886	0.309013	insig
NMW0027	GC-MS	C8H8O	BenzAldehyde, 3-methyl-	Aldehyde	-	620-23-5	9	9	9	65266.6	68334.9	25397.7	1.10194	0.0618571	5888.86	12.5238	up
XMW0186	GC-MS	C8H12O	3,5-Octadien-2-one, (E,E)-	Ketone	-	30086-02-3	5621.27	4066.57	5661.89	160553	168212	179211	1.10245	0.000988054	33.0935	5.04848	up
XMW0295	GC-MS	C10H12	Benzene, 1-methyl-3-(1-methylethenyl)-	Aromatics	-	1124-20-5	105033	92910.7	93518	9852.79	9005.91	6014.95	1.09571	0.000939536	0.0853411	-3.55061	down
KMW0259	GC-MS	C10H16	.gamma.-Terpinene	Terpenoids	-	99-85-4	27952.9	29575.5	27929.9	97545	26433.9	23603.1	0.372205	0.482169	1.72695	0.788223	insig
XMW0015	GC-MS	C8H8O	BenzAldehyde, 4-methyl-	Aldehyde	-	104-87-0	529411	435525	445913	33739	32757.6	24513.7	1.10047	0.00422735	0.0645075	-3.95439	down
XMW1220	GC-MS	C6H10O4	Ethyl hydrogen succinate	Ester	-	1070-34-4	15748.7	15970.4	19301.8	8889.63	9054.29	5865	1.0242	0.00437157	0.46665	-1.09959	down
D306	GC-MS	C10H18O	1,5-Heptadien-4-ol, 3,3,6-trimethyl-	Terpenoids	-	27644-04-8	6.92265e+07	5.86143e+07	5.8629e+07	5.50216e+06	4.96985e+06	4.38394e+06	1.1021	0.00356598	0.0796694	-3.64983	down
D405	GC-MS	C9H12O	Benzene, (2-methoxyethyl)-	Aromatics	-	3558-60-9	5.63686e+07	4.80203e+07	4.80018e+07	4.11038e+06	3.51619e+06	2.94758e+06	1.10086	0.00309044	0.0693884	-3.84916	down
KMW0273	GC-MS	C10H14	Benzene, 1,2,4,5-tetramethyl-	Aromatics	-	95-93-2	19643.2	20867.9	20039.9	16539.9	24196.7	12812.6	0.429611	0.558799	0.884364	-0.177288	insig
WMW0092	GC-MS	C9H21N	1-OctanAmine,N-methyl-	Amine	-	2439-54-5	1.86109e+06	1.6191e+06	1.66912e+06	138200	120979	96298.5	1.10062	0.00168121	0.0690341	-3.85655	down
XMW1227	GC-MS	C9H14O2	(E)-2-Methylbut-2-en-1-yl methacrylate	Ester	-	88142-95-4	7.76912e+06	6.49064e+06	6.49909e+06	607255	551354	476618	1.10173	0.00416494	0.0787725	-3.66616	down
XMW1067	GC-MS	C9H16O2	Butanoic acid, 2-pentenyl ester, (Z)-	Ester	-	42125-13-3	7.60771e+06	5.52118e+06	7.49168e+06	358908	412693	219871	1.09354	0.0101266	0.0480817	-4.37837	down
D133	GC-MS	C11H22O2	4-Heptanol, 2,6-dimethyl-, acetate	Ester	-	10250-45-0	256826	138966	136921	378525	411860	411344	0.993201	0.0234612	2.25587	1.17368	insig
XMW1442	GC-MS	C10H18O	Ketone, methyl 2,2,3-trimethylcyclopentyl	Ketone	-	17983-22-1	3.52859e+06	2.94904e+06	3.28891e+06	1.63946e+06	1.78343e+06	1.77262e+06	1.08627	0.00819621	0.53197	-0.910583	insig
QWM0006	GC-MS	C9H18O	2-Nonanone	Ketone	-	821-55-6	1.64502e+06	1200345	1469962	78920	88166	61741	1.09971	0.00870945	0.0530266	-4.23714	down
XMW1219	GC-MS	C9H16O2	2-Butenoic acid, 2-methyl-, 2-methylpropyl ester, (E)-	Ester	-	61692-84-0	3.16704e+06	2.80089e+06	2.68242e+06	2.16807e+06	2.36585e+06	2.30745e+06	0.995516	0.0392773	0.790878	-0.338473	insig
XMW0168	GC-MS	C8H12S	3-Butylthiophene	Heterocyclic compound	-	34722-01-5	1.31401e+06	1.12054e+06	1.2254e+06	723061	796676	777056	1.07595	0.00769458	0.627549	-0.672199	insig
XMW1429	GC-MS	C4H7N3O	1-(2-Hydroxyethyl)-1,2,4-triazole	Heterocyclic compound	-	3273-14-1	1.10501e+06	924063	1.03278e+06	511695	581624	561403	1.08146	0.00605671	0.540431	-0.887817	insig
XMW0644	GC-MS	C6H10N2	1H-Imidazole, 2-propyl-	Heterocyclic compound	-	50995-95-4	3.95877e+06	3.28051e+06	3.70082e+06	1.56157e+06	1.72724e+06	1.65338e+06	1.09161	0.0069828	0.451749	-1.14641	down
KMW0283	GC-MS	C9H18O2	Hexanoic acid, propyl ester	Ester	-	626-77-7	583425	402716	550453	28122.3	34499.8	25251	1.09898	0.0128209	0.0571869	-4.12817	down
D407	GC-MS	C10H18O	7-Octen-4-ol, 2-methyl-6-methylene-, (S)-	Terpenoids	-	35628-05-8	881178	833702	828728	344408	392442	361781	1.09927	3.1578e-05	0.431918	-1.21117	down
XMW0969	GC-MS	C9H16O2	2-Butenoic acid, 2-methyl-, 2-methylpropyl ester	Ester	-	66917-61-1	3.16704e+06	2.87128e+06	2.92474e+06	2.14751e+06	2.34962e+06	2.30693e+06	1.05995	0.00436801	0.759123	-0.397595	insig
KMW0291	GC-MS	C10H18O	Linalool	Terpenoids	-	78-70-6	1.3742e+06	1.18666e+06	1.54718e+06	1.11431e+06	1.20483e+06	1.22003e+06	0.731177	0.203378	0.861521	-0.215041	insig
WMW0057	GC-MS	C9H16O	6-Nonenal, (Z)-	Aldehyde	-	2277-19-2	1.98447e+07	1.26599e+07	1.75035e+07	771047	825147	578901	1.09802	0.0170557	0.0434947	-4.52302	down
XMW1233	GC-MS	C8H16O	3-Cyclopentyl-1-propanol	Alcohol	-	767-05-5	3.95514e+06	2.43195e+06	3.53128e+06	39366.6	43422.9	25719	1.09957	0.018716	0.0109401	-6.51422	down
XMW0410	GC-MS	C9H18O	1-Nonen-4-ol	Alcohol	-	35192-73-5	1.3369e+06	832618	1.21142e+06	85128.4	70255.4	134787	1.08476	0.019571	0.0858257	-3.54245	down
NMW0038	GC-MS	C8H10O	Benzenemethanol, 4-methyl-	Alcohol	-	589-18-4	2.90748e+06	1.73776e+06	2.55443e+06	78378.9	85417.5	48400.3	1.09494	0.0213147	0.0294732	-5.08445	down
XMW0909	GC-MS	C10H14O	2,6,6-Trimethylbicyclo[3.2.0]hept-2-en-7-one	Ketone	-	4613-37-0	1.70212e+06	950260	1.4869e+06	49817.3	52103.4	42367.6	1.09785	0.0270272	0.0348584	-4.84235	down
NMW0040	GC-MS	C9H10O	Benzyl methyl ketone	Ketone	-	103-79-7	17310	15449	11580.8	19758.4	21196.7	19781	0.887205	0.0740332	1.36979	0.453951	insig
KMW0293	GC-MS	C8H12O	2,4-Octadienal, (E,E)-	Aldehyde	-	30361-28-5	4.75209e+07	2.91165e+07	4.32173e+07	1.26011e+06	1.34131e+06	1.02612e+06	1.09948	0.0199426	0.0302662	-5.04615	down
KMW0301	GC-MS	C10H18O	Bicyclo[3.1.0]hexan-2-ol, 2-methyl-5-(1-methylethyl)-, (1.alpha.,2.alpha.,5.alpha.)-	Terpenoids	-	17699-16-0	9	9	9	30796.6	40944.7	34586.5	1.10459	0.00690898	3938.07	11.9433	up
XMW0606	GC-MS	C9H18O2	1,3-Dioxolane, 2-butyl-2-ethyl-	Heterocyclic compound	-	935-49-9	6726.04	6680.21	8912.88	9611.45	7882.83	8366.95	0.625259	0.266862	1.1587	0.21251	insig
XMW1311	GC-MS	C7H6O2	2-Propenal, 3-(2-furanyl)-	Heterocyclic compound	-	623-30-3	15819.2	28634.1	17541.2	2446.15	1855.83	2353.39	1.0866	0.0440041	0.107354	-3.21955	down
D313	GC-MS	C10H20O2	3-Hexene, 1-(1-ethoxyethoxy)-, (Z)-	Aldehyde	-	28069-74-1	5.17232e+07	3.17385e+07	4.62236e+07	1.40719e+06	1.44037e+06	1.02282e+06	1.0986	0.0195631	0.0298444	-5.0664	down
WMW0129	GC-MS	C10H22O	4-Ethyl-2-octanol	Alcohol	-	19780-78-0	240944	213801	304055	16638	12009	7776	1.09079	0.0115367	0.0480008	-4.3808	down
XMW1127	GC-MS	C9H18O2	Formic acid, octyl ester	Ester	-	112-32-3	145797	119704	130064	89364.9	87594	148678	0.578051	0.368946	0.823219	-0.280653	insig
XMW0798	GC-MS	C12H18	Benzene, 1,3-bis(1-methylethyl)-	Aromatics	-	99-62-7	31468.3	16002.2	34249.2	1668.65	2316.11	1255.82	1.07908	0.0457907	0.0641288	-3.96288	down
XMW0489	GC-MS	C10H16O	p-Mentha-1(7),2-dien-8-ol	Terpenoids	-	65293-09-6	61326	74553.2	71562.9	1.81434e+06	1.98913e+06	1.67028e+06	1.10362	0.00270433	26.3869	4.72175	up
XMW0820	GC-MS	C8H11N	BenzenAmine, 2-ethyl-	Amine	-	578-54-1	137676	161976	141486	47692.3	51227.1	35750.5	1.08248	0.000839279	0.305278	-1.71181	down
KMW0312	GC-MS	C10H14O	Furan, 3-(4-methyl-3-pentenyl)-	Terpenoids	-	539-52-6	3.31678e+06	2.05544e+06	2.85804e+06	106432	106440	72323.9	1.09753	0.0187469	0.0346521	-4.85091	down
XMW1071	GC-MS	C9H16O2	Butanoic acid, cyclopentyl ester	Ester	-	6290-13-7	3.04525e+06	3.16292e+06	3.47414e+06	1.73498e+06	1.81992e+06	1.10096e+06	1.01146	0.00651765	0.480863	-1.0563	down
D101	GC-MS	C10H14O	Benzeneethanol, .alpha.,.alpha.-dimethyl-	Alcohol	-	100-86-7	102896	154066	104233	834330	958892	840893	1.09421	0.000808506	7.29279	2.86647	up
XMW0780	GC-MS	C10H14	2,6-Dimethyl-1,3,5,7-octatetraene, E,E-	Terpenoids	-	460-01-5	9	9	9	62803.4	64599.2	30842.2	1.10326	0.0406133	5860.92	12.5169	up
WMW0015	GC-MS	C10H18O	Terpinen-4-ol	Terpenoids	-	562-74-3	8.55981e+06	1.10692e+07	9.39832e+06	673776	771509	681076	1.10243	0.00662024	0.0732537	-3.77096	down
KMW0325	GC-MS	C10H18O	3-Cyclohexen-1-ol, 1-methyl-4-(1-methylethyl)-	Terpenoids	-	586-82-3	831136	866140	967362	452684	487803	297774	1.02243	0.00385535	0.464701	-1.10563	down
XMW0068	GC-MS	C11H18O	2,7-Nonadien-5-one, 4,6-dimethyl-	Ketone	-	74630-80-1	958059	992686	1.09167e+06	542700	584777	341156	1.00306	0.00820858	0.48272	-1.05074	down
XMW1472	GC-MS	C11H22	Cyclohexane, 1-ethyl-2-propyl-	Hydrocarbons	-	62238-33-9	957016	985495	1.08534e+06	539096	564978	336424	1.00924	0.00705361	0.475749	-1.07173	down
XMW0362	GC-MS	C8H14O2	2H-Pyran-2-one, tetrahydro-4,6,6-trimethyl-	Heterocyclic compound	-	20628-36-8	15601.1	15147.4	17571.4	13075.3	13569.2	12137.9	0.983333	0.0309652	0.802616	-0.317217	insig
D384	GC-MS	C4H8S3	TriSulfur compounds, methyl 2-propenyl	Sulfur compounds	-	34135-85-8	7.61306e+07	7.9829e+07	8.71344e+07	4.07502e+07	4.32547e+07	2.60518e+07	1.02336	0.00428044	0.452733	-1.14327	down
XMW0927	GC-MS	C9H12O2	2,6,6-Trimethyl-2-cyclohexene-1,4-dione	Ketone	-	1125-21-9	160297	165632	181502	88610.3	92658	57574.7	1.02361	0.00486912	0.470691	-1.08715	down
D342	GC-MS	C10H16	2,4,6-Octatriene, 2,6-dimethyl-, (E,E)-	Terpenoids	-	3016-19-1	33146	32066.3	36929.6	41483.5	39176.2	26060.1	0.0942748	0.785949	1.04482	0.0632518	insig
D323	GC-MS	C6H8N2S	Pyrazine, 2-methyl-3-(methylthio)-	Heterocyclic compound	-	2882-20-4	9	9	9	57814.2	65206.3	37444.1	1.1041	0.0232558	5943.13	12.537	up
XMW0654	GC-MS	C10H16O	Ethanone, 1-(1,4-dimethyl-3-cyclohexen-1-yl)-	Terpenoids	-	43219-68-7	15789	21213.8	17188.4	3146.01	9	515.905	0.858917	0.00212911	0.0677401	-3.88385	insig
XMW0801	GC-MS	C12H18	Cyclohexene, 3,4-diethenyl-1,6-dimethyl-	Hydrocarbons	-	61142-14-1	5373.36	5448.93	5801.2	4547.51	1825.46	424.532	0.751999	0.112059	0.408909	-1.29015	insig
KMW0343	GC-MS	C9H16O	2-Nonenal	Aldehyde	-	2463-53-8	9	9	9	1.50257e+06	1.62793e+06	1.41142e+06	1.10482	0.00171407	168219	17.36	up
w01	GC-MS	C8H16O	Cyclooctyl Alcohol	Alcohol	-	696-71-9	23377.5	27971.1	22026.9	4963.27	2203.7	769.442	1.01037	0.00101961	0.108162	-3.20874	down
D412	GC-MS	C10H16O	5,7-Octadien-4-one, 2,6-dimethyl-, (Z)-	Terpenoids	-	3588-18-9	75251.3	93576.9	82582.6	9	9	9	1.10474	0.00401447	0.000107394	-13.1848	down
NMW0059	GC-MS	C5H6N2	4-Aminopyridine	Heterocyclic compound	-	504-24-5	413744	600445	367771	1.79149e+06	1.96942e+06	1.9434e+06	1.08135	0.000132106	4.1277	2.04534	up
XMW0679	GC-MS	C8H16O4	AcetAldehyde, tetramer	Aldehyde	-	108-62-3	332370	240478	378562	2.05718e+06	2.32098e+06	1.9593e+06	1.09249	0.0013431	6.66112	2.73577	up
NMW0060	GC-MS	C10H18O	p-Menth-8-en-1-ol, stereoisomer	Terpenoids	-	7299-40-3	81003	53922.5	96028.5	286890	327174	280070	1.06975	0.000381578	3.87148	1.95289	up
NMW0064	GC-MS	C10H14O	Benzofuran, 4,5,6,7-tetrahydro-3,6-dimethyl-	Terpenoids	-	494-90-6	9	9	9	51997.6	55973.4	44979.4	1.10475	0.00395183	5664.83	12.4678	up
KMW0361	GC-MS	C9H10O	BenzAldehyde, 4-ethyl-	Aldehyde	-	4748-78-1	9	9	9	64355.1	67462.4	35634.2	1.10374	0.0314114	6201.92	12.5985	up
XMW0675	GC-MS	C10H14O	2,6,6-Trimethylcyclohexa-1,4-dienecarbAldehyde	Aldehyde	-	162376-82-1	107356	87844.8	93857	478.251	319.02	184.794	1.09925	0.00358399	0.00339747	-8.20132	down
KMW0376	GC-MS	C9H20O	2-Nonanol	Alcohol	-	628-99-9	2.94201e+07	1.93976e+07	2.72153e+07	874766	857029	686093	1.10055	0.014982	0.0318005	-4.97481	down
KMW0382	GC-MS	C7H8O	Phenol, 2-methyl-	Phenol	-	95-48-7	2624.89	3718.15	2089.32	58321	56507.1	49426.3	1.09752	0.00211239	19.4791	4.28385	up
XMW0122	GC-MS	C10H18O	Cyclohexanol, 2-methyl-3-(1-methylethenyl)-, (1.alpha.,2.alpha.,3.alpha.)-	Alcohol	-	54244-81-4	1.28628e+06	1.51834e+06	1.32652e+06	52002.5	60624.5	52517.4	1.10378	0.0028845	0.0399754	-4.64475	down
XMW1457	GC-MS	C8H8O2	BenzAldehyde, 3-methoxy-	Aldehyde	-	591-31-1	6894.52	4741.61	4627.52	1.58082e+06	1.83748e+06	933960	1.10087	0.0328923	267.607	8.06397	up
XMW1079	GC-MS	C11H22O2	Butanoic acid, 1-methylhexyl ester	Ester	-	39026-94-3	3.35229e+08	3.89047e+08	3.43738e+08	9163.55	36977.9	5463.02	1.09796	0.00219424	4.83182e-05	-14.3371	down
KMW0388	GC-MS	C10H16O	Carveol	Terpenoids	-	99-48-9	9	9	9	1841.4	2222.08	1043.43	1.10083	0.0395821	189.145	7.56335	up
w31	GC-MS	C10H18O2	Butanoic acid, 4-hexenyl ester, (Z)-	Ester	-	69727-41-9	98360.6	108194	90363.8	15817.8	18324.7	16415.7	1.1016	0.00334307	0.170276	-2.55405	down
XMW0794	GC-MS	C12H18	1,5-Cyclooctadiene, 3-(1-methyl-2-propenyl)-	Hydrocarbons	-	16538-88-8	144301	167814	126078	5569.63	5938.55	7277.53	1.10202	0.00729977	0.0428709	-4.54386	down
D203	GC-MS	C11H22O2	cis-4-Hepten-1-al diethyl acetal	Aldehyde	-	18492-65-4	1.32704e+07	1.66227e+07	1.35962e+07	943980	918546	698805	1.10072	0.00585513	0.0588957	-4.08569	down
XMW0217	GC-MS	C10H18O	cis-7-Decen-1-al	Aldehyde	-	21661-97-2	419388	343104	525088	100613	129145	75475.1	1.06548	0.0183921	0.237059	-2.07668	down
XMW1326	GC-MS	C7H11NO2	2,6-Piperidinedione, 3-ethyl-	Heterocyclic compound	-	25115-69-9	404135	460165	334942	13697	10991.7	8024.35	1.09906	0.00845954	0.0272781	-5.19611	down
XMW1136	GC-MS	C10H18O2	Lilac Alcohol C	Alcohol	-	33081-36-6	482699	543081	489001	2572.68	4928.98	2710.11	1.101	0.00143517	0.00674141	-7.21273	down
XMW0491	GC-MS	C3H7N5	3-Methyl-4,5-diamino-1,2,4(4H)-triazole	Heterocyclic compound	-	21532-07-0	1.63962e+07	1.8938e+07	1.69026e+07	16961.2	21066.8	10227	1.10258	0.00198753	0.000923777	-10.0802	down
WMW0216	GC-MS	C12H20O2	Fenchyl acetate	Ester	-	13851-11-1	2.15211e+06	2.30321e+06	2.04354e+06	240469	365761	264309	1.09574	0.000211567	0.133953	-2.90021	down
KMW0411	GC-MS	C11H18O2	1,6-Octadien-3-ol, 3,7-dimethyl-, formate	Ester	-	115-99-1	62348.7	77662.6	111901	21174.3	23441	14309.7	1.05352	0.0439838	0.23391	-2.09597	down
XMW1064	GC-MS	C8H12N2	1,4-Methano-1H-Cyclopropa[d]pyridazine, 4,4a,5,5a-tetrahydro-6,6-dimethyl-, (1.alpha.,4.alpha.,4a.alpha.,5a.alpha.)-	Heterocyclic compound	-	109746-10-3	276667	316393	289185	13728.6	58587.8	9112.84	1.01965	0.000275563	0.0922978	-3.43756	down
NMW0092	GC-MS	C10H18O	(+)-neodihydrocarveol	Terpenoids	-	18675-33-7	1.52751e+06	1.68178e+06	1.48028e+06	39095.4	142332	22344.8	1.05226	0.000119567	0.0434523	-4.52442	down
XMW1087	GC-MS	C7H10O4	2(3H)-Furanone, 5-(acetyloxy)dihydro-5-methyl-	Heterocyclic compound	-	57681-51-3	1.63936e+07	1.90398e+07	1.68126e+07	26550.3	39968.6	13256.7	1.09928	0.00222115	0.00152692	-9.35516	down
XMW0545	GC-MS	C10H15N	Benzenemethanamine, N-(1-methylethyl)-	Amine	-	102-97-6	234415	270496	241762	13225.5	11164.3	30110.7	1.07775	0.000291109	0.0729911	-3.77614	down
KMW0420	GC-MS	C10H18O	2-Cyclohexen-1-ol, 3-methyl-6-(1-methylethyl)-, trans-	Terpenoids	-	16721-39-4	95932.5	96066.9	84054.2	7421.35	8004.96	8174.88	1.10386	0.00216959	0.0854949	-3.54802	down
WMW0104	GC-MS	C9H18O	Cyclooctanemethanol	Alcohol	-	3637-63-6	68037.2	100293	79334	146083	122464	125984	0.977801	0.0168786	1.593	0.67175	insig
KMW0539	GC-MS	C6H8O2	2(5H)-Furanone, 5-ethyl-	Heterocyclic compound	-	2407-43-4	91478.7	50045.5	70754.5	397955	448746	424838	1.08417	6.50241e-05	5.98995	2.58254	up
KMW0641	GC-MS	C6H10O2	2-Hexenoic Acid, (E)-	Acid	-	13419-69-7	427303	368550	332833	479688	406603	282168	0.0552189	0.849487	1.03524	0.0499631	insig
KMW0258	GC-MS	C7H8O2	2-methoxy-Phenol	Phenol	-	90-05-1	364123	316901	345007	535574	572911	399755	0.937238	0.0841081	1.46997	0.555791	insig
KMW0483	GC-MS	C11H22O	Undecanal	Aldehyde	-	112-44-7	1.14418e+08	1.30539e+08	1.137e+08	2.84261e+07	2.47435e+07	1.87748e+07	1.09036	0.000608474	0.200594	-2.31765	down
D294	GC-MS	C10H16O	2-Cyclopenten-1-one, 2-pentyl-	Ketone	-	25564-22-1	20836.5	35496.5	26532.3	3491.8	4339	2065.89	1.07134	0.0270411	0.119431	-3.06575	down
KMW0481	GC-MS	C11H22O2	Acetic acid, nonyl ester	Ester	-	143-13-5	61083.8	80068.9	56971.6	120684	122946	85608.7	0.939951	0.0474986	1.66178	0.732729	insig
XMW0472	GC-MS	C9H10O3	1,2-Ethanediol, monobenzoate	Ester	-	94-33-7	22592.5	26101	31046.7	23656.8	30418.4	20289.2	0.269739	0.667295	0.932583	-0.100696	insig
XMW1463	GC-MS	C12H20O3	2-Oxabicyclo[2.2.2]octan-6-ol, 1,3,3-trimethyl-, acetate	Ester	-	57709-95-2	49900.4	46066.5	61370.3	19767.6	24748.8	17756.4	1.06397	0.0101327	0.395792	-1.33719	down
XMW0544	GC-MS	C15H24	Azulene, 1,2,3,3a,4,5,6,7-octahydro-1,4-dimethyl-7-(1-methylethenyl)-, [1R-(1.alpha.,3a.beta.,4.alpha.,7.beta.)]-	Terpenoids	-	22567-17-5	603800	444126	438909	295971	322589	334330	0.985299	0.0755744	0.640885	-0.641862	insig
KMW0563	GC-MS	C13H22O	5,9-Undecadien-2-one, 6,10-dimethyl-, (E)-	Ketone	-	3796-70-1	24378.9	32321.3	30447.2	238381	247383	144858	1.08449	0.030641	7.23628	2.85525	up
XMW0735	GC-MS	C10H12O	Benzenemethanol, .alpha.-2-propenyl-	Alcohol	-	936-58-3	5.39681e+06	4.73559e+06	4.91449e+06	3.92553e+06	4.27428e+06	4.43653e+06	0.944505	0.0350761	0.839798	-0.251886	insig
KMW0482	GC-MS	C10H16O	2,4-Decadienal, (E,E)-	Aldehyde	-	25152-84-5	226267	303697	252945	471721	459847	335913	0.956344	0.0454772	1.61894	0.695047	insig
KMW0606	GC-MS	C15H24	.alpha.-Muurolene	Terpenoids	-	10208-80-7	119757	172702	141146	9	9	9	1.10458	0.0111323	6.22688e-05	-13.9711	down
XMW0916	GC-MS	C11H15Br	(5-bromopentyl)-Benzene	Aromatics	-	14469-83-1	3.93637e+06	2.89153e+06	2.8356e+06	1.75807e+06	1.89612e+06	1.89375e+06	1.02544	0.0596646	0.574111	-0.800597	insig
XMW0875	GC-MS	C19H38	1-Nonadecene	Hydrocarbons	-	18435-45-5	15522.1	21369.1	15092.7	2612.51	2797.8	2486.69	1.09629	0.0182889	0.151912	-2.71869	down
KMW0432	GC-MS	C10H16O	2,6-Octadienal, 3,7-dimethyl-, (Z)-	Terpenoids	-	106-26-3	920616	937517	867706	500059	533004	550159	1.0953	0.000241759	0.58082	-0.783837	insig
D74	GC-MS	C9H10O2	4-Acetylanisole	Ketone	-	100-06-1	1569.08	1961.62	2645.09	15070.6	13736.3	8450.8	1.06921	0.0333948	6.03287	2.59284	up
XMW0422	GC-MS	C14H30	3,5-Dimethyldodecane	Hydrocarbons	-	107770-99-0	38772.1	37487.7	26906.8	40381.5	37483.3	40708.9	0.592237	0.303603	1.14934	0.200809	insig
XMW0455	GC-MS	C8H10O2	1,3-Benzenediol, 4,5-dimethyl-	Phenol	-	527-55-9	5.02015e+06	3.63409e+06	3.60406e+06	2.13136e+06	2.28799e+06	2.30187e+06	1.03296	0.0566676	0.5483	-0.866962	insig
NMW0393	GC-MS	C13H14N2O3	Mephobarbital	Heterocyclic compound	-	115-38-8	83315.2	100042	97592.1	598.705	405.501	538.649	1.10343	0.00311815	0.00549158	-7.50856	down
XMW0064	GC-MS	C18H30O	5,9,13-Pentadecatrien-2-one, 6,10,14-trimethyl-	Ketone	-	762-29-8	148395	180171	154753	1604.3	1379.99	1091.58	1.10314	0.00366585	0.0084331	-6.88972	down
XMW1401	GC-MS	C11H20O2	n-Valeric acid cis-3-hexenyl ester	Ester	-	35852-46-1	2.46668e+06	2.20948e+06	2.27975e+06	1.76468e+06	1.9176e+06	1.98578e+06	1.00163	0.0137911	0.814856	-0.295384	insig
NMW0101	GC-MS	C10H16O2	Ascaridole	Terpenoids	-	512-85-6	193932	176689	177678	146805	160983	160625	0.971626	0.0228517	0.854299	-0.227188	insig
XMW1240	GC-MS	C11H22O2	Hexanoic acid, 2-methylbutyl ester	Ester	-	2601-13-0	827428	1.1156e+06	976241	549318	545899	540890	1.05744	0.0357196	0.560452	-0.835338	insig
XMW0047	GC-MS	C10H14O	Phenol, 2-(1-methylpropyl)-	Phenol	-	89-72-5	187244	296869	229369	5306.57	8182.6	6852.13	1.09918	0.0185093	0.0285099	-5.13239	down
XMW0586	GC-MS	C13H28	Dodecane, 5-methyl-	Hydrocarbons	-	17453-93-9	7258.82	8191.6	5779.32	453194	460161	235837	1.09695	0.0362755	54.1312	5.75839	up
KMW0433	GC-MS	C9H10O	Phenol, 4-(2-propenyl)-	Aromatics	-	501-92-8	736.857	1165.86	962.444	4496.96	5629.42	3801.92	1.079	0.0162219	4.86127	2.28133	up
D442	GC-MS	C9H16O2	2(3H)-Furanone, 5-butyldihydro-4-methyl-	Heterocyclic compound	-	39212-23-2	3.67763e+07	4.24002e+07	3.73773e+07	8.29005e+06	7.12923e+06	5.20774e+06	1.08959	0.000576429	0.176974	-2.49839	down
NMW0131	GC-MS	C6H6O2S	2-Thiopheneacetic acid	Heterocyclic compound	-	1918-77-0	680591	888776	634321	1.64946e+06	1.6671e+06	1.15137e+06	1.00749	0.0304212	2.02748	1.01969	up
XMW0025	GC-MS	C9H10O2	Paroxypropione	Ketone	-	70-70-2	20845.6	19411	19651.7	29280.5	26846.2	26900.3	1.07931	0.00305404	1.3859	0.470826	insig
XMW1333	GC-MS	C10H12O2	Benzoic acid, 3,4-dimethyl-, methyl ester	Ester	-	38404-42-1	20916.9	28923.3	33994.5	73377.3	71901.2	68919.6	1.05797	0.00387735	2.55501	1.35333	up
D443	GC-MS	C11H16O3	2-Furancarboxylic acid, hexyl ester	Ester	-	39251-86-0	13857.3	13211.4	12583.3	37593.1	35334.2	24954.1	1.06096	0.0368944	2.46851	1.30364	up
KMW0570	GC-MS	C12H22O	2-Dodecenal, (E)-	Aldehyde	-	20407-84-5	30078.9	34504.5	35022.4	11601.3	34193.7	11192.6	0.76032	0.19862	0.572132	-0.805581	insig
KMW0591	GC-MS	C14H24O2	Butanoic acid, 1,7,7-trimethylbicyclo[2.2.1]hept-2-yl ester, endo-	Ester	-	13109-70-1	106062	85071.1	108473	35778.3	37386.9	35095.7	1.09139	0.0127547	0.361344	-1.46856	down
XMW1351	GC-MS	C15H24	Dauca-4(11),8-diene	Terpenoids	-	395070-76-5	15444.2	12548.1	15973.3	6005.65	6330.85	6617.34	1.08521	0.0140063	0.431106	-1.21389	down
D241	GC-MS	C15H26O	3-Cyclohexene-1-methanol, .alpha.,4-dimethyl-.alpha.-(4-methyl-3-pentenyl)-, [R-(R*,R*)]-	Terpenoids	-	23178-88-3	227384	261791	238942	4270.27	4403.78	5315.19	1.10405	0.00178153	0.0192129	-5.70178	down
KMW0679	GC-MS	C10H10O2	2-Propenoic acid, 3-phenyl-, methyl ester, (E)-	Ester	-	1754-62-7	96058.7	104663	88920.8	332779	334133	243830	1.08366	0.018322	3.14436	1.65277	up
NMW0367	GC-MS	C12H9N	Carbazole	Heterocyclic compound	-	86-74-8	6479.68	7081.9	6874.61	3136.27	5862.33	2689	0.872578	0.0944889	0.571907	-0.806148	insig
NMW0399	GC-MS	C7H8N4O2	1,7-Dimethylxanthine	Heterocyclic compound	-	611-59-6	11859.2	13617.6	13344.9	26251	23627.9	21276.6	1.07338	0.00972934	1.83288	0.874112	insig
XMW0017	GC-MS	C17H34O2	Hexadecanoic acid, methyl ester	Ester	-	112-39-0	73505.8	73415.2	73176	99343.6	73915.1	87514.2	0.761191	0.20622	1.18481	0.244655	insig
D188	GC-MS	C5H5N3O	Pyrazinamide	Heterocyclic compound	-	98-96-4	1.06476e+06	1.04743e+06	1.00806e+06	655606	719534	740035	1.08281	0.000815168	0.677886	-0.560885	insig
KMW0490	GC-MS	C9H16O2	trans-3-Methyl-4-octanolide	Ester	-	39638-67-0	24089.6	29910.7	24309.9	15092.2	13517.1	11173.6	1.04781	0.00807626	0.508017	-0.977052	insig
XMW1102	GC-MS	C11H10O2	Vinyl trans-cinnamate	Ester	-	17719-70-9	59520.5	70107.9	83101.4	147562	140560	134143	1.06157	0.00239799	1.98498	0.989126	insig
XMW1340	GC-MS	C7H6S2	Thieno[2,3-b]thiophene,2-methyl-	Heterocyclic compound	-	13393-75-4	9	9	9	43122.4	48325.3	29546.9	1.10423	0.0187314	4481.28	12.1297	up
NMW0155	GC-MS	C12H18O	Propofol	Phenol	-	2078-54-8	7241.77	8635.8	10631.8	30077.2	30261.3	29783	1.08731	0.00180559	3.39962	1.76537	up
KMW0545	GC-MS	C12H24O	Dodecanal	Aldehyde	-	112-54-9	46411.9	63351.7	63787.3	55620.6	79609.3	48621.1	0.139654	0.773401	1.05935	0.0831775	insig
KMW0710	GC-MS	C10H12O2	Phenol, 2-methoxy-4-(1-propenyl)-	Phenol	-	97-54-1	9540.41	8182.5	9285.12	29375.2	26853.2	32354.6	1.09673	0.00384018	3.27988	1.71364	up
KMW0615	GC-MS	C9H16O2	2(3H)-Furanone, 5-butyldihydro-4-methyl-, cis-	Heterocyclic compound	-	55013-32-6	1.99968e+07	1.8012e+07	2.30058e+07	723254	954899	730741	1.10209	0.00537516	0.0394806	-4.66271	down
XMW1167	GC-MS	C15H24O	(1R,3E,7E,11R)-1,5,5,8-Tetramethyl-12-oxabicyclo[9.1.0]dodeca-3,7-diene	Terpenoids	-	19888-34-7	65190.2	75503	71038.2	10995.4	12617.8	9276.69	1.09858	0.00109684	0.155338	-2.68652	down
XMW1038	GC-MS	C15H24O	Longifolenaldehyde	Terpenoids	-	19890-84-7	25173.4	30172.1	20311.8	7325.61	4368.32	5826.31	1.06994	0.0147599	0.231574	-2.11046	down
XMW0387	GC-MS	C12H25I	Dodecane, 1-iodo-	Halogenated hydrocarbons	-	4292-19-7	74262.1	67027.8	66024.7	30133.3	30812.3	33400	1.09678	0.00183083	0.455084	-1.13579	down
NMW0270	GC-MS	C13H10O	Benzophenone	Ketone	-	119-61-9	49247.6	57012.2	77149.8	33151.1	51893.6	36758.4	0.812978	0.12068	0.664104	-0.590519	insig
WMW0230	GC-MS	C15H26O	Hinesol	Terpenoids	-	23811-08-7	553362	491606	502516	183934	179810	203106	1.09908	0.00122733	0.366304	-1.44888	down
XMW1163	GC-MS	C9H12O3S	Ethyl 2-hydroxybenzyl sulfone	Phenol	-	53380-27-1	3671.12	2083.71	2890.37	28716.4	31106.8	23028.6	1.09042	0.00752442	9.58356	3.26056	up
XMW0184	GC-MS	C18H24O	1-(1-Adamantyl)-1-phenylethanol	Aromatics	-	303797-64-0	312752	287574	250652	3375.58	2130.02	2470.15	1.10241	0.00408021	0.00937246	-6.73736	down
KMW0424	GC-MS	C11H22O2	Butanoic acid, 2-methyl-, hexyl ester	Ester	-	10032-15-2	2.31551e+06	2.35724e+06	2.34715e+06	47066.9	120055	31029.8	1.08014	9.98622e-06	0.0282272	-5.14677	down
XMW1140	GC-MS	C10H12O2	2-methyl-5-propan-2-ylcyclohexa-2,5-diene-1,4-dione	Ketone	-	490-91-5	16705.3	16974.1	15670.1	11659.7	12472.8	7919.78	0.929939	0.0455148	0.649496	-0.622607	insig
XMW0693	GC-MS	C11H18O2	2,6-Octadienoic acid, 3,7-dimethyl-, methyl ester	Ester	-	2349-14-6	87021.1	109624	81888.4	185016	179278	130765	0.990473	0.0343779	1.77738	0.829748	insig
XMW0740	GC-MS	C7H7N3	3-Methyl-pyrrolo(2,3-b)pyrazine	Heterocyclic compound	-	20321-99-7	6625.75	11308.8	6947.95	9	9	9	1.10344	0.0316557	0.0010851	-9.84796	down
WMW0204	GC-MS	C12H18O2	Bicyclo[3.1.0]hexan-3-ol, 4-methylene-1-(1-methylethyl)-, acetate	Terpenoids	-	3536-54-7	9	9	9	6470.54	7808.08	4869.31	1.10395	0.0173041	709.183	9.47001	up
XMW0803	GC-MS	C12H20O2	Iso-3-thujyl acetate	Ester	-	62181-90-2	9	9	9	8419.15	6486.8	5467.2	1.10418	0.0159032	754.561	9.55949	up
XMW0952	GC-MS	C12H24O2	4-Methylhexyl 3-methylbutanoate	Ester	-	1215127-80-2	41238.3	44999.2	35883.5	69183.4	68534.3	56411.5	1.02531	0.0123209	1.58965	0.668706	insig
KMW0493	GC-MS	C9H10O2	2-Methoxy-4-vinylphenol	Aromatics	-	7786-61-0	7332.04	23998.3	11478.4	31490.8	22174.6	17633.6	0.682481	0.218302	1.66552	0.735976	insig
NMW0135	GC-MS	C8H7NS	Thiocyanic acid, phenylmethyl ester	Sulfur compounds	-	3012-37-1	74019.3	89840.7	74913	42329	33189.1	22949.4	1.01975	0.00361476	0.41239	-1.27792	down
D358	GC-MS	C12H22O2	4-tert-Butylcyclohexyl acetate	Ester	-	32210-23-4	37087.8	35871.5	33902.6	135708	129015	94176.6	1.08492	0.0222142	3.35855	1.74784	up
XMW0303	GC-MS	C12H22O2	Hexanoic acid, 5-hexenyl ester	Ester	-	108058-81-7	47464.3	39314.7	47644.7	2.76468e+06	2.38186e+06	1.50244e+06	1.09963	0.0283501	49.4629	5.62827	up
KMW0558	GC-MS	C14H24O2	1,5-Dimethyl-1-vinyl-4-hexenyl butyrate	Ester	-	78-36-4	93002.1	66803.4	66054.2	70485.7	69990.3	67633.1	0.321935	0.573568	0.921409	-0.118086	insig
XMW0979	GC-MS	C15H24	(4R,4aS,6S)-4,4a-Dimethyl-6-(prop-1-en-2-yl)-1,2,3,4,4a,5,6,7-octahydronaphthalene	Terpenoids	-	823810-22-6	2.69753e+06	1.95156e+06	1.94686e+06	1.18946e+06	1.26971e+06	1.27501e+06	1.02695	0.0604119	0.566132	-0.820789	insig
XMW0259	GC-MS	C16H34	Pentadecane, 2-methyl-	Hydrocarbons	-	1560-93-6	37237.5	29793.1	34118.1	23217.4	25913.4	20833.3	0.99129	0.0209229	0.691696	-0.53179	insig
WMW0059	GC-MS	C13H16O2	E-2-Hexenyl benzoate	Ester	-	76841-70-8	9	9	9	595309	507077	403180	1.10467	0.0120209	55761.7	15.767	up
D215	GC-MS	C15H26O2	Daucol	Terpenoids	-	887-08-1	18128.5	15802.2	17523.4	9021.8	9462.27	10009.2	1.08902	0.0033787	0.55376	-0.852666	insig
D325	GC-MS	C15H22O	(3R,3aR,7S,8aS)-3,6,8,8-Tetramethyl-4,7,8,8a-tetrahydro-1H-3a,7-methanoazulen-2(3H)-one	Terpenoids	-	288249-25-2	92319.4	82756.9	80989.2	38431.6	39514.9	42289.1	1.09565	0.00310124	0.46955	-1.09065	down
KMW0652	GC-MS	C15H26O	Cubenol	Terpenoids	-	21284-22-0	93500	81161.9	84929.2	44199.7	43774.7	45625.2	1.09547	0.00647038	0.514654	-0.958325	insig
XMW1491	GC-MS	C16H28O2	Lavandulyl caproate	Ester	-	59550-36-6	181740	160554	159470	71596.5	70240.9	78145.6	1.09572	0.00293432	0.438419	-1.18962	down
KMW0689	GC-MS	C14H12O2	Benzyl Benzoate	Ester	-	120-51-4	432786	602345	477937	54920.8	62270.9	62043.4	1.09948	0.0126061	0.118458	-3.07755	down
XMW0294	GC-MS	C11H20O	10-Undecenal	Aldehyde	-	112-45-8	9	9	9	196649	182025	184914	1.10484	0.000566109	20873.7	14.3494	up
D191	GC-MS	C10H14O2	2-Hexanoylfuran	Heterocyclic compound	-	14360-50-0	1.24005e+07	1.09564e+07	1.12814e+07	8.97304e+06	9.72035e+06	1.00897e+07	0.968813	0.0265272	0.83096	-0.26715	insig
XMW1465	GC-MS	C10H16O2	7-Oxabicyclo[4.1.0]heptan-2-one, 6-methyl-3-(1-methylethyl)-	Ketone	-	5286-38-4	32599.7	43724.4	30204.8	12541.6	12148.2	8606.32	1.06224	0.0206459	0.312555	-1.67782	down
KMW0487	GC-MS	C9H10O	2-Propen-1-ol, 3-phenyl-	Alcohol	-	104-54-1	759908	900099	793614	185179	162478	120589	1.08981	0.00111659	0.190839	-2.38957	down
XMW0732	GC-MS	C8H12N2O	1-Pentanone, 1-(1H-imidazol-4-yl)-	Heterocyclic compound	-	69393-15-3	11275.1	12211.3	11095.7	19671.8	17448.8	17019.4	1.07504	0.0075962	1.56555	0.646668	insig
XMW0464	GC-MS	C9H11NO2	Benzoic acid, 2-(methylamino)-, methyl ester	Ester	-	85-91-6	304552	486142	321644	77439.8	77128.3	66765.9	1.08421	0.0355376	0.198981	-2.3293	down
NMW0162	GC-MS	C10H18O2	8-Methyl-6-nonenoic Acid	Acid	-	21382-25-2	37902.7	32177.9	51985.3	441548	375431	239049	1.08049	0.0336899	8.6513	3.11292	up
XMW1094	GC-MS	C13H20	Megastigma-4,6(Z),8(E)-triene	Hydrocarbons	-	51468-85-0	22244.7	12619.7	14084.8	4.78532e+06	4.12092e+06	2.56876e+06	1.10027	0.028468	234.426	7.87299	up
XMW1253	GC-MS	C13H26O2	Butanoic acid, 1-methyloctyl ester	Ester	-	69727-42-0	5.74224e+06	7.09303e+06	5.88035e+06	635369	624046	431269	1.09688	0.00483692	0.0903355	-3.46856	down
XMW0159	GC-MS	C16H34	2,6,10-Trimethyltridecane	Hydrocarbons	-	3891-99-4	33087	31195.4	24962.3	57063	55947.8	50230.3	1.05582	0.00174277	1.82914	0.871165	insig
KMW0573	GC-MS	C15H24	(E)-.beta.-Famesene	Terpenoids	-	18794-84-8	165809	155229	159414	517259	529930	303006	1.03852	0.0586104	2.81026	1.4907	up
XMW1435	GC-MS	C14H22O2	(6,6-dimethyl-2-bicyclo[3.1.1]hept-2-enyl)methyl 2-methylpropanoate	Ester	-	29021-37-2	33290.2	36966.1	31984.3	7119.99	15733.2	9920.96	1.02872	0.0032451	0.320559	-1.64134	down
KMW0595	GC-MS	C15H24	1,3-Cyclohexadiene, 5-(1,5-dimethyl-4-hexenyl)-2-methyl-, [S-(R*,S*)]-	Terpenoids	-	495-60-3	12174.4	10929.2	10288.4	10411.5	10880.3	11582.2	0.134732	0.806163	0.984491	-0.0225506	insig
KMW0619	GC-MS	C14H24O2	Butanoic acid, 3,7-dimethyl-2,6-octadienyl ester, (E)-	Ester	-	106-29-6	184382	167557	193165	51037.6	57716	51226.1	1.09995	0.00181417	0.293484	-1.76864	down
XMW1336	GC-MS	C11H13NO3	N-Benzyloxy-2-carbomethoxyaziridine	Heterocyclic compound	-	53084-33-6	220734	249032	216574	242067	221629	178064	0.37359	0.537163	0.935045	-0.0968919	insig
KMW0620	GC-MS	C15H22	Benzene, 1-(1,5-dimethyl-4-hexenyl)-4-methyl-	Terpenoids	-	644-30-4	2.92545e+06	2.12977e+06	2.1577e+06	1.22226e+06	1.31301e+06	1.31864e+06	1.04423	0.0483513	0.534306	-0.904261	insig
KMW0642	GC-MS	C16H34	Hexadecane	Hydrocarbons	-	544-76-3	28063.5	24198	24086.5	101278	85415.7	69202.4	1.08369	0.0213554	3.35171	1.7449	up
XMW0425	GC-MS	C10H10N2	6-Quinolinamine, 2-methyl-	Heterocyclic compound	-	65079-19-8	9	9	9	4841.65	5486.94	3995.47	1.10442	0.00811158	530.521	9.05127	up
XMW0664	GC-MS	C9H10O3	BenzAldehyde, 2,4-dihydroxy-3,6-dimethyl-	Aldehyde	-	34883-14-2	8999.13	8031.39	7728.27	4665.63	4995.57	3540.13	1.03867	0.00292294	0.533198	-0.907258	insig
NMW0434	GC-MS	C13H20N2O2	Procaine	Ester	-	59-46-1	215028	245077	202807	9	9	9	1.10477	0.00321494	4.07293e-05	-14.5836	down
NMW0105	GC-MS	C9H12O	Phenol, 4-propyl-	Phenol	-	645-56-7	9	9	9	7961.88	10580.9	7479.11	1.10431	0.0121421	963.774	9.91255	up
XMW0764	GC-MS	C10H16O	(S)-(-)-(4-Isopropenyl-1-cyclohexenyl)methanol	Terpenoids	-	18457-55-1	1.03086e+07	1.17147e+07	1.03114e+07	2.3137e+06	1.99768e+06	1.47055e+06	1.09022	0.000442445	0.178816	-2.48346	down
D356	GC-MS	C8H10O2	3-Methoxy-5-methylphenol	Phenol	-	3209-13-0	11162	14099.6	10564.4	31373.1	32477.5	22884.3	1.052	0.0205499	2.421	1.2756	up
XMW0953	GC-MS	C11H14O2	Phenylacetic acid propyl ester	Ester	-	4606-15-9	299911	270796	331034	301953	312100	165523	0.428729	0.487699	0.864523	-0.210024	insig
NMW0165	GC-MS	C7H8O2	Orcinol	Phenol	-	504-15-4	54172.7	69844.7	55775.4	288207	288882	210142	1.08773	0.0137752	4.37855	2.13045	up
KMW0522	GC-MS	C15H24	Copaene	Terpenoids	-	3856-25-5	2262.82	1498.16	2805.45	6926.06	11518.2	5850.49	1.01762	0.0705462	3.69985	1.88747	up
XMW1129	GC-MS	C10H12O3	Ethyl mandelate	Ester	-	774-40-3	6811.65	3733.93	4477.39	2576.91	3289.63	3533.36	0.818958	0.172486	0.625703	-0.676451	insig
KMW0578	GC-MS	C15H26O2	Butanoic acid, 3-methyl-, 1-ethenyl-1,5-dimethyl-4-hexenyl ester	Ester	-	1118-27-0	3.76397e+06	2.75201e+06	2.72823e+06	1.65213e+06	1.77966e+06	1.77655e+06	1.03074	0.0567596	0.563416	-0.827728	insig
XMW0849	GC-MS	C15H26O	2-Naphthalenemethanol, 2,3,4,4a,5,6,7,8-octahydro-.alpha.,.alpha.,4a,8-tetramethyl-, [2R-(2.alpha.,4a.beta.,8.beta.)]-	Terpenoids	-	63891-61-2	9	9	9	73748.9	85781.1	69084.7	1.10474	0.00423399	8467.21	13.0477	up
XMW0199	GC-MS	C17H36	Hexadecane, 4-methyl-	Hydrocarbons	-	25117-26-4	40250	41183	33504.5	4692.54	5591.86	5564.39	1.10073	0.00480653	0.137891	-2.8584	down
XMW0099	GC-MS	C13H28	Decane, 2,3,5-trimethyl-	Hydrocarbons	-	62238-11-3	63059.8	57207.8	53366.8	56962.7	54450.5	50548	0.547778	0.322731	0.932772	-0.100404	insig
D355	GC-MS	C10H15N	2,6-Octadienenitrile, 3,7-dimethyl-, (Z)-	Nitrogen compounds	-	31983-27-4	271204	311993	239223	14374.2	25199.4	10084.5	1.08458	0.0049727	0.0603805	-4.04977	down
w02	GC-MS	C10H18O	2,4-Decadien-1-ol	Alcohol	-	14507-02-9	15651.8	17150.9	13609.2	26275.7	24522.2	25074.1	1.06327	0.00356704	1.63475	0.70907	insig
XMW0968	GC-MS	C10H14O	4,7,7-Trimethylbicyclo[4.1.0]hept-3-en-2-one	Ketone	-	81800-50-2	3.80395e+06	4.37941e+06	3.92042e+06	957926	840257	629549	1.09012	0.000433133	0.200576	-2.31778	down
D301	GC-MS	C12H14O	BenzeneacetAldehyde, .alpha.-(2-methylpropylidene)-	Aldehyde	-	26643-91-4	395561	511768	410956	2.2078e+06	2.2377e+06	1.62473e+06	1.08905	0.0132657	4.60463	2.20309	up
XMW0372	GC-MS	C15H32	Tridecane, 4,8-dimethyl-	Hydrocarbons	-	55030-62-1	184963	206121	173059	582069	584230	432313	1.08039	0.0177045	2.83371	1.50269	up
KMW0526	GC-MS	C13H18O	2-Buten-1-one, 1-(2,6,6-trimethyl-1,3-cyclohexadien-1-yl)-, (E)-	Terpenoids	-	23726-93-4	163220	182290	158237	487160	487416	371504	1.08288	0.0157186	2.67214	1.41799	up
XMW0946	GC-MS	C10H14O2	Ethanol, 2-(4-ethylphenoxy)-	Alcohol	-	54411-10-8	215839	267557	222126	32029.2	30931.9	20720.9	1.09308	0.00447805	0.11861	-3.0757	down
XMW1256	GC-MS	C13H20O	2-Butanone, 4-(2,6,6-trimethyl-1,3-cyclohexadien-1-yl)-	Ketone	-	20483-36-7	6780.81	7548.65	7356.98	26327.8	25043.1	23952.9	1.10243	0.000538518	3.47331	1.79631	up
WMW0075	GC-MS	C15H26O	1,6,10-Dodecatrien-3-ol, 3,7,11-trimethyl-	Terpenoids	-	7212-44-4	840061	783405	884815	393787	492629	346048	1.0572	0.00208558	0.491358	-1.02515	down
XMW0639	GC-MS	C15H22	1,4-Methanobenzocyclodecene, 1,2,3,4,4a,5,8,9,12,12a-decahydro-	Terpenoids	-	74708-73-9	58250.8	62895.7	64036.6	9	9	9	1.10482	0.000820877	0.000145802	-12.7437	down
D322	GC-MS	C15H22O	(3S,3aR,6R,8aS)-3,7,7-Trimethyl-8-methylenehexahydro-1H-3a,6-methanoazulen-2(3H)-one	Terpenoids	-	28624-27-3	9	9	9	77325	80822.8	69702.5	1.10481	0.00186358	8438.9	13.0428	up
NMW0361	GC-MS	C15H28O2	(1R,4aR,7R,8aR)-7-(2-Hydroxypropan-2-yl)-1,4a-dimethyldecahydronaphthalen-1-ol	Terpenoids	-	4666-84-6	119678	129182	132111	9	9	9	1.10482	0.000872261	7.08716e-05	-13.7844	down
XMW0155	GC-MS	C13H13NO	5-Phenyl-o-anisidine	Amine	-	39811-17-1	46917.7	54918.2	42664.5	9	9	9	1.10467	0.00551753	0.000186851	-12.3858	down
w42	GC-MS	C14H30O	2-Ethyl-1-dodecanol	Alcohol	-	19780-33-7	10506.8	10329.6	9942.63	34086.4	28227.1	25096.1	1.08891	0.0186011	2.83991	1.50584	up
KMW0726	GC-MS	C14H30O	1-Tetradecanol	Alcohol	-	112-72-1	24017.8	23970.6	22322.2	50740	50731.6	43186.4	1.0908	0.00778463	2.05742	1.04083	up
XMW1470	GC-MS	C10H16O	[1,1'-Bicyclopentyl]-2-one	Ketone	-	4884-24-6	166747	155380	132532	17321.6	15932.1	16828	1.1024	0.00545843	0.110152	-3.18243	down
XMW0790	GC-MS	C12H18	6,7-Dimethyl-1,2,3,5,8,8a-hexahydronaphthalene	Terpenoids	-	107914-92-1	4537.94	2137.82	2310.68	35899.5	32444.3	24339	1.07868	0.0116176	10.3136	3.36648	up
WMW0069	GC-MS	C9H8O	2-Propenal, 3-phenyl-	Aldehyde	-	104-55-2	41700.9	33646.2	45927.1	27482.2	30466.6	28011.9	0.957147	0.074176	0.708812	-0.496525	insig
D139	GC-MS	C11H16O	Benzenepropanol, .alpha.,.alpha.-dimethyl-	Alcohol	-	103-05-9	10231.2	11220	13877.5	11450.9	11107.6	4666.62	0.5186	0.354477	0.770624	-0.375901	insig
XMW0640	GC-MS	C15H24	Panaxene	Terpenoids	-	871660-95-6	45632.5	43463.3	43473.9	31556.3	30616.5	22938	1.00451	0.0225173	0.642009	-0.639335	insig
D390	GC-MS	C11H18O	Cyclopentanone, 2-(2-hexenyl)-	Ketone	-	34687-46-2	26125.3	22817.8	22273.8	27902.2	27018.3	27465.6	0.913317	0.0846175	1.15683	0.210182	insig
XMW0036	GC-MS	C10H16O2	1,3-Cyclopentanedione, 4-(3-methylbutyl)-	Ketone	-	939-86-6	48759.7	57798.8	57584.6	11536.3	12030.6	5608.71	1.06173	0.000465652	0.177744	-2.49212	down
KMW0503	GC-MS	C8H9NO2	Methyl anthranilate	Ester	-	134-20-3	144300	117234	136709	23982.3	20857	15663.9	1.09255	0.00280565	0.151925	-2.71857	down
NMW0171	GC-MS	C8H8O3	Acetic Acid, phenoxy-	Acid	-	122-59-8	5471	5527	7897	72076	86956	70980	1.09823	0.00451617	12.1732	3.60563	up
D340	GC-MS	C12H16O	3-Hexanone, 1-phenyl-	Ketone	-	29898-25-7	28063.7	33106.8	29043	18899.9	18977.1	13733.7	1.01853	0.0053976	0.572094	-0.805676	insig
XMW0825	GC-MS	C15H24	Bicyclo[3.1.1]heptane, 6-methyl-2-methylene-6-(4-methyl-3-pentenyl)-, [1R-(1.alpha.,5.alpha.,6.beta.)]-	Terpenoids	-	55123-21-2	1992	1853	2857.59	17552	17931	15281	1.09418	0.00111489	7.57379	2.92101	up
NMW0200	GC-MS	C15H24	1,6,10-Dodecatriene, 7,11-dimethyl-3-methylene-	Terpenoids	-	77129-48-7	23270.2	29238.4	25633.5	52612.5	51686.4	38416.2	1.02406	0.0301557	1.82635	0.868966	insig
XMW0050	GC-MS	C15H24O	Isospathulenol	Terpenoids	-	88395-46-4	83278.3	74043.7	74733.7	44015.8	42172.1	44658.6	1.09338	0.00528365	0.563858	-0.826596	insig
XMW0788	GC-MS	C9H9NO4	Phenol, 4-methyl-2-nitro-, acetate (ester)	Ester	-	54646-55-8	71027.5	80066.2	63305	3546.64	4372.29	3065.15	1.10096	0.00484984	0.0512321	-4.28681	down
XMW1046	GC-MS	C14H26O3	Heptanoic acid, anhydride	Others	-	626-27-7	1.53081e+06	926952	1.15357e+06	87246	94786.7	76853.7	1.09682	0.0238668	0.0716873	-3.80214	down
NMW0345	GC-MS	C12H8O2	2-Dibenzofuranol	Heterocyclic compound	-	86-77-1	16660.6	15451.9	13813.7	9	9	9	1.10471	0.00289447	0.0005879	-10.7321	down
XMW0994	GC-MS	C10H9NO	3-Amino-2-naphthol	Phenol	-	5417-63-0	19372.4	21371.6	17010.6	1821.48	2775.3	2335.99	1.09578	0.00399987	0.120038	-3.05843	down
XMW0309	GC-MS	C8H15NO	Piperidin-3-one, 2,2,5-methyl-	Heterocyclic compound	-	103634-57-7	1.73912e+06	2.56291e+06	2.64133e+06	9597.75	36977.9	5601.37	1.07844	0.0153299	0.00751466	-7.05608	down
D245	GC-MS	C10H14O	4-Phenyl-2-butanol	Alcohol	-	2344-70-9	226301	281587	213952	52434.3	55188.7	55333.1	1.09757	0.0121003	0.225751	-2.1472	down
WMW0016	GC-MS	C12H20O2	(-)-Bornyl acetate	Terpenoids	-	5655-61-8	9	9	9	10033.5	9314.8	3754.73	1.10018	0.0605496	855.67	9.74091	up
XMW1061	GC-MS	C10H16S	Thiophene, 2-hexyl-	Heterocyclic compound	-	18794-77-9	64281.2	58527.8	50339.4	21601.7	19994.9	12377.3	1.0524	0.00203177	0.31172	-1.68168	down
XMW0448	GC-MS	C2H4N6	1,2,4,5-Tetrazine-3,6-diAmine	Heterocyclic compound	-	19617-90-4	31317.3	35882.1	28647.3	17836.3	14907.8	14296.5	1.06733	0.00640237	0.49079	-1.02682	down
WMW0106	GC-MS	C11H20O2	6-Nonen-1-ol, acetate, (Z)-	Ester	-	76238-22-7	394836	445661	391166	469823	553993	319496	0.205329	0.646187	1.09065	0.125188	insig
KMW0537	GC-MS	C15H24	Cyclohexane, 1-ethenyl-1-methyl-2,4-bis(1-methylethenyl)-, (1.alpha.,2.beta.,4.beta.)-	Terpenoids	-	33880-83-0	150720	142985	149985	865859	1.04888e+06	794841	1.10018	0.00983015	6.10692	2.61045	up
D125	GC-MS	C12H16O2	Benzeneacetic acid, 2-methylpropyl ester	Ester	-	102-13-6	42303	44542.8	43373.7	70113.3	88865.2	48348	0.856498	0.158923	1.59213	0.670959	insig
XMW1077	GC-MS	C7H14O4	1,3-Dioxolane-2,2-diethanol	Alcohol	-	5694-95-1	4620.17	9661.89	8301.74	7802.31	7916.44	5681.63	0.0393096	0.829257	0.947599	-0.0776521	insig
D435	GC-MS	C10H18OS	Cyclohexanone, 2-(1-mercapto-1-methylethyl)-5-methyl-	Ketone	-	38462-22-5	37940.4	32240.1	43657.6	438973	375431	237499	1.08679	0.0339728	9.24034	3.20795	up
KMW0555	GC-MS	C15H24	trans-.alpha.-Bergamotene	Terpenoids	-	13474-59-4	2980.92	3022.87	2305.81	1.87931e+06	2.04237e+06	1.1052e+06	1.10259	0.0285863	604.948	9.24067	up
NMW0209	GC-MS	C11H20O2	Undecylenic Acid	Acid	-	112-38-9	39290.2	36681.8	45062	17554.7	16120.3	14947.9	1.08939	0.00640754	0.401729	-1.31571	down
KMW0613	GC-MS	C15H24	.alpha.-Farnesene	Terpenoids	-	502-61-4	97862.2	84069.3	86539	44641.7	60399.4	43421.6	1.0314	0.00533776	0.552995	-0.854663	insig
XMW0972	GC-MS	C16H26O	Khusimyl methyl ether	Hydrocarbons	-	300349-20-6	10155.8	15967.6	11272.6	5195.77	3349.37	5959.92	1.00294	0.0347408	0.387877	-1.36633	down
KMW0508	GC-MS	C10H14O	p-Cymen-7-ol	Alcohol	-	536-60-7	10152	10288.9	10120.4	14899.2	17267.7	16386.2	1.08526	0.012655	1.58871	0.667854	insig
WMW0181	GC-MS	C11H20O2	4-Decenoic acid, methyl ester, Z-	Ester	-	7367-83-1	1.58663e+06	2.17134e+06	1.45937e+06	3.78493e+06	3.83321e+06	2.65273e+06	0.987769	0.029112	1.96861	0.977174	insig
D193	GC-MS	C10H16O	p-Mentha-1,8-dien-7-ol	Terpenoids	-	536-59-4	9	9	9	11102.8	10681.8	10793.5	1.10484	0.000134643	1206.6	10.2367	up
KMW0509	GC-MS	C15H24	Cyclohexene, 4-ethenyl-4-methyl-3-(1-methylethenyl)-1-(1-methylethyl)-, (3R-trans)-	Terpenoids	-	20307-84-0	14421.1	13050.8	17240.5	58271.4	55833.7	34753.2	1.05547	0.0401103	3.32924	1.73519	up
KMW0551	GC-MS	C14H30	Tetradecane	Hydrocarbons	-	629-59-4	93595.1	94274.2	72441	146871	129990	120774	0.995131	0.0120832	1.52754	0.611214	insig
D393	GC-MS	C12H18O2	1,3-Cyclohexadiene-1-carboxylic acid, 2,6,6-trimethyl-, ethyl ester	Ester	-	35044-59-8	4189.31	3134.96	3157.96	20001.2	21308	15207.2	1.09006	0.0120705	5.39164	2.43072	up
XMW0200	GC-MS	C15H32	Tetradecane, 4-methyl-	Hydrocarbons	-	25117-24-2	104441	94464.3	85339.9	69342.1	68761.2	59862.8	1.01856	0.0180752	0.696463	-0.521881	insig
NMW0228	GC-MS	C10H12O2	2,4,6-Cycloheptatrien-1-one, 2-hydroxy-4-(1-methylethyl)-	Terpenoids	-	499-44-5	34517	31549.9	39772.7	55365.5	66104.9	59591	1.05344	0.00387268	1.71072	0.7746	insig
KMW0629	GC-MS	C12H26O	1-Dodecanol	Alcohol	-	112-53-8	794100	576050	573997	344659	364115	367449	1.03367	0.0569397	0.553571	-0.853159	insig
KMW0672	GC-MS	C12H12	Naphthalene, 2,6-dimethyl-	Aromatics	-	581-42-0	9429.47	13145.8	12025	14616.7	17744.2	30209.2	0.83443	0.184338	1.80837	0.854687	insig
WMW0144	GC-MS	C17H34	1-Heptadecene	Hydrocarbons	-	6765-39-5	23083	16278.7	17887.6	14953	12684.3	11983	0.910627	0.0867171	0.692066	-0.531019	insig
NMW0338	GC-MS	C12H16N2	N,N-DimethyltryptAmine	Heterocyclic compound	-	61-50-7	49120.9	25060.3	34894.3	1461.09	1660.2	1333.99	1.09567	0.0378249	0.0408459	-4.61367	down
D386	GC-MS	C15H22O	Squamulosone	Terpenoids	-	34413-94-0	3605.13	3195.81	4363.69	3807.12	2926.09	2119.39	0.603502	0.272627	0.792914	-0.334763	insig
XMW0420	GC-MS	C13H28	Undecane, 2,9-dimethyl-	Hydrocarbons	-	17301-26-7	33638.5	16093.2	25073.3	8723.72	14011.7	5488.09	0.909271	0.0730715	0.377294	-1.40624	insig
XMW0733	GC-MS	C10H16O2	7-Oxabicyclo[4.1.0]heptan-2-one, 3-methyl-6-(1-methylethyl)-	Terpenoids	-	5729-99-7	38037.9	43724.5	36441.4	28502.3	27948.9	24432.6	1.02953	0.0141931	0.684273	-0.547355	insig
KMW0377	GC-MS	C11H20O2	cis-3-Hexenyl-.alpha.-methylbutyrate	Ester	-	53398-85-9	113614	93071.8	94240.8	10867.1	16694.9	7801.48	1.08099	0.00221627	0.117515	-3.08908	down
XMW1321	GC-MS	C10H16O3	Furan, 2-(1,2-diethoxyethyl)-	Heterocyclic compound	-	14133-54-1	51203.1	52366.3	55333.3	44803.8	38011.4	22594.3	0.809733	0.10854	0.663359	-0.592139	insig
KMW0210	GC-MS	C15H24	1H-Cyclopenta[1,3]cyclopropa[1,2]benzene, octahydro-7-methyl-3-methylene-4-(1-methylethyl)-, [3aS-(3a.alpha.,3b.beta.,4.beta.,7.alpha.,7aS*)]-	Terpenoids	-	13744-15-5	10272.2	10356.4	12368.1	49380.8	62156.1	46600.5	1.09465	0.0116557	4.79253	2.26079	up
WMW0122	GC-MS	C11H20O	1-Undecyn-4-ol	Alcohol	-	22127-86-2	13499.8	18509.5	13848.2	10308.7	7869.55	6837.83	0.980707	0.0293504	0.545517	-0.874303	insig
XMW0539	GC-MS	C9H12O2	3,4-Dimethoxytoluene	Aromatics	-	494-99-5	49756	44828	42964.6	48838.4	53000.9	49889.9	0.778918	0.132139	1.1031	0.141558	insig
XMW0213	GC-MS	C11H22O2	Isopentyl hexanoate	Ester	-	2198-61-0	925320	869685	855126	672129	720905	731867	1.0524	0.00368523	0.80181	-0.318668	insig
XMW0238	GC-MS	C13H28	Undecane, 4,4-dimethyl-	Hydrocarbons	-	17312-68-4	878429	1.02728e+06	909951	13122.7	16444.5	9821.56	1.10179	0.00235043	0.0139892	-6.15954	down
XMW1243	GC-MS	C7H6ClNO2	Methyl 6-chloronicotinate	Ester	-	73781-91-6	146150	128442	128333	2.38939e+06	2.41001e+06	1.75593e+06	1.10145	0.0107356	16.2694	4.02409	up
NMW0099	GC-MS	C9H7N	Quinoline	Heterocyclic compound	-	91-22-5	2.02393e+06	2.79516e+06	1.89324e+06	21784.8	20491.6	15465.4	1.10219	0.0157114	0.00860235	-6.86105	down
XMW0223	GC-MS	C7H9NO2	1H-Pyrrole-2,5-dione, 3-ethyl-4-methyl-	Heterocyclic compound	-	20189-42-8	1.28268e+06	1.12584e+06	1.16428e+06	3.57756e+06	3.66018e+06	2.93648e+06	1.09241	0.00846383	2.8477	1.5098	up
D85	GC-MS	C11H22O2	Butanoic acid, 3-methyl-, hexyl ester	Ester	-	10032-13-0	2.21392e+06	2.32396e+06	2.12341e+06	1.1856e+06	1.29267e+06	1.33709e+06	1.09156	0.000294006	0.572765	-0.803984	insig
KMW0429	GC-MS	C11H18O2	Isobornyl formate	Ester	-	1200-67-5	456693	507508	452853	31655.8	53652.7	35348.5	1.09539	0.000470532	0.0851464	-3.55391	down
XMW0109	GC-MS	C13H28	Dodecane, 4-methyl-	Hydrocarbons	-	6117-97-1	2806.65	2406.13	2272.06	41832.3	41788.8	35393.8	1.10295	0.00315196	15.9008	3.99103	up
XMW0369	GC-MS	C13H28	Undecane, 6-ethyl-	Hydrocarbons	-	17312-60-6	113615	92735.6	94268.8	10867.1	16694.9	7801.48	1.08093	0.00230413	0.117635	-3.08761	down
XMW0583	GC-MS	C8H8O2	Ethanone, 1-(3-hydroxyphenyl)-	Ketone	-	121-71-1	9	9	9	172620	191647	104470	1.10412	0.0275129	17360.7	14.0835	up
KMW0441	GC-MS	C10H12O2	Benzeneacetic acid, ethyl ester	Ester	-	101-97-3	176274	154665	160542	135074	145072	146247	0.924201	0.0575772	0.867569	-0.20495	insig
XMW0855	GC-MS	C6H10OS2	Ethanone, 1-(2-methyl-1,3-dithiolan-2-yl)-	Heterocyclic compound	-	33266-07-8	6846.64	7244.22	5520.88	1357.03	1789.77	1626.07	1.09047	0.00802905	0.243368	-2.03879	down
XMW1444	GC-MS	C10H16O	Carvenone	Terpenoids	-	499-74-1	19116	32646.6	22009.9	15974.3	20776.7	6073.75	0.681139	0.159327	0.580498	-0.784638	insig
XMW1330	GC-MS	C13H28	Dodecane, 3-methyl-	Hydrocarbons	-	17312-57-1	167436	154061	118295	192868	175937	183460	0.818286	0.113418	1.25574	0.328535	insig
KMW0454	GC-MS	C10H14O	1-Cyclohexene-1-carboxAldehyde, 4-(1-methylethenyl)-	Aldehyde	-	2111-75-3	6126.46	6399.91	4085.3	8876.85	7795.24	7908.96	0.894849	0.0497264	1.47975	0.565349	insig
NMW0111	GC-MS	C11H17N	BenzeneethanAmine, N,.alpha.,.alpha.-trimethyl-	Amine	-	100-92-5	586894	675516	600571	15915.7	14118.4	13946	1.10419	0.00204808	0.0236074	-5.40462	down
NMW0112	GC-MS	C10H14O	Phenol, 2-(1,1-dimethylethyl)-	Phenol	-	88-18-6	12910.2	10202.5	11726.9	25189.7	24126.3	14079.2	0.907488	0.108686	1.81963	0.863644	insig
KMW0459	GC-MS	C10H16O	2,6-Octadienal, 3,7-dimethyl-, (E)-	Terpenoids	-	141-27-5	6254.41	8272.29	8616.09	105551	103611	72409.4	1.09625	0.0148461	12.1667	3.60486	up
D422	GC-MS	C11H24O	Undecanol-5	Alcohol	-	37493-70-2	97632.4	145092	111458	17081.7	18748.7	8815.84	1.07106	0.014792	0.126054	-2.98788	down
XMW1324	GC-MS	C10H10O	BenzeneacetAldehyde, .alpha.-ethylidene-	Aldehyde	-	4411-89-6	4370.38	3338.34	3411.3	218149	211014	170678	1.10313	0.00560443	53.9423	5.75335	up
XMW0364	GC-MS	C11H24O	6-Undecanol	Alcohol	-	23708-56-7	18435.9	16835.9	12865.1	23875.8	21805.9	24838.8	0.953596	0.0273847	1.465	0.550899	insig
D299	GC-MS	C10H18O	Ethanol, 2-(3,3-dimethylcyclohexylidene)-, (Z)-	Alcohol	-	26532-23-0	2730.57	853.437	2835.75	33704.7	45557.1	25823.3	1.05996	0.0278108	16.369	4.03289	up
D222	GC-MS	C11H20O2	Hexanoic acid, 3-methyl-2-butenyl ester	Ester	-	76649-22-4	384602	392685	371279	4824.19	5722.78	5670.58	1.10451	0.000265751	0.0141198	-6.14613	down
XMW0110	GC-MS	C14H30	Dodecane, 4,6-dimethyl-	Hydrocarbons	-	61141-72-8	660438	596425	718712	72683.2	78264.1	69978.7	1.103	0.00349616	0.111829	-3.16064	down
XMW1244	GC-MS	C11H22O2	Hexanoic acid, pentyl ester	Ester	-	540-07-8	11107.7	12273.2	6744.89	13781.5	13616.9	12999.2	0.727864	0.176552	1.34096	0.423272	insig
NMW0118	GC-MS	C9H8O	1H-Inden-1-one, 2,3-dihydro-	Ketone	-	83-33-0	30826	26103.5	29577.3	5572.69	4755.64	5324.38	1.10122	0.00285225	0.180942	-2.4664	down
D170	GC-MS	C11H14O2	p-Tolyl isobutyrate	Ester	-	103-93-5	130858	205202	159710	18280.2	20940.5	11540.4	1.08427	0.019232	0.102389	-3.28787	down
D163	GC-MS	C10H14O2	dl-Camphoroquinone	Terpenoids	-	10373-78-1	11233.9	14106.3	12301.2	22860.9	19926.8	17358.9	1.01116	0.0245047	1.59788	0.67616	insig
XMW0287	GC-MS	C11H14O2	Benzoic acid, 2-methylpropyl ester	Ester	-	120-50-3	1.0143e+06	1.32923e+06	942643	2.47851e+06	2.51327e+06	1.73001e+06	1.00796	0.0300589	2.04548	1.03244	up
KMW0478	GC-MS	C15H24	cis-.beta.-Farnesene	Terpenoids	-	28973-97-9	6735.69	6257.32	5838.31	1.07171e+06	1.16316e+06	758637	1.10335	0.0149165	158.964	7.31256	up
D346	GC-MS	C11H16O2	Methyl 6,6-dimethylbicyclo[3.1.1]hept-2-ene-2-carboxylate	Ester	-	30649-97-9	9	9	9	26392.3	22818.1	24423.7	1.1048	0.0017698	2727.19	11.4132	up
XMW0973	GC-MS	C9H13NO	Ketone, methyl 2,4,5-trimethylpyrrol-3-yl	Heterocyclic compound	-	19005-95-9	1.74838e+06	2.03414e+06	1.78837e+06	411747	355864	257343	1.08838	0.000674853	0.183984	-2.44235	down
D145	GC-MS	C11H14O2	Propanoic acid, 2-methyl-, phenylmethyl ester	Ester	-	103-28-6	1242.39	9	1661.56	11787.9	12639.3	6929.9	0.806927	0.0263463	10.7647	3.42824	insig
KMW0457	GC-MS	C8H9NO	Ethanone, 1-(2-aminophenyl)-	Ketone	-	551-93-9	103440	113348	105601	43266	50920.8	30659	1.05355	0.00225845	0.387251	-1.36866	down
XMW1439	GC-MS	C9H11NO2	Benzene, (1-nitropropyl)-	Aromatics	-	5279-14-1	1.59595e+07	1.82365e+07	1.61233e+07	3.75683e+06	3.25475e+06	2.38231e+06	1.08929	0.000414215	0.186685	-2.42132	down
XMW1252	GC-MS	C10H14O	2(1H)-Naphthalenone, 3,4,5,6,7,8-hexahydro-	Ketone	-	13837-12-2	1.3573e+06	1.53212e+06	1.35831e+06	476009	424264	323212	1.08407	0.000237881	0.288033	-1.7957	down
NMW0127	GC-MS	C10H18O2	6-Octenoic Acid, 3,7-dimethyl-	Acid	-	502-47-6	1.25857e+07	1.44068e+07	1.25552e+07	2.88537e+06	2.50733e+06	1.87203e+06	1.09073	0.000680221	0.183696	-2.44461	down
w07	GC-MS	C11H10	1H-Indene, 1-ethylidene-	Hydrocarbons	-	2471-83-2	47107.3	55557.6	46538.9	99949.4	105447	112714	1.08781	0.000376693	2.13205	1.09224	up
XMW1406	GC-MS	C10H12O2	2'-Ethoxyacetophenone	Ketone	-	2142-67-8	42297.6	45765.4	55191.4	21945.5	19173.6	13089.8	1.04148	0.00474344	0.37841	-1.40198	down
XMW0580	GC-MS	C15H32	Dodecane, 2,6,10-trimethyl-	Hydrocarbons	-	3891-98-3	15733.9	18014.8	13077.7	25930.2	23203	20667.7	0.963884	0.0214579	1.49063	0.575922	insig
XMW1089	GC-MS	C11H20O2	Hexanoic acid, cyclopentyl ester	Ester	-	5413-59-2	109983	137435	100808	255602	257760	184813	1.02192	0.0246124	2.00495	1.00357	up
XMW0209	GC-MS	C10H16O	1,4-Cyclohexadiene-1-methanol, 4-(1-methylethyl)-	Alcohol	-	22539-72-6	3.13156e+06	2.81729e+06	3.54306e+06	112786	151932	115367	1.10202	0.00463221	0.040043	-4.64231	down
XMW1323	GC-MS	C9H8O2	2(3H)-Benzofuranone, 3-methyl-	Heterocyclic compound	-	32267-71-3	15321	14729.1	19668.8	8743.31	10814.5	6137.24	0.965104	0.0184785	0.516807	-0.952302	insig
XMW1247	GC-MS	C13H20	Cyclohexene, 6-(2-butenylidene)-1,5,5-trimethyl-, (E,Z)-	Hydrocarbons	-	71186-24-8	7.44357e+06	6.65471e+06	8.51562e+06	281598	377432	290995	1.10192	0.00541158	0.0420106	-4.5731	down
NMW0141	GC-MS	C10H18O2	2,7-Octadiene-1,6-diol, 2,6-dimethyl-, (E)-	Terpenoids	-	75991-61-6	39601.2	46080.2	39484.9	29131	24777	24956	1.05225	0.00642739	0.630074	-0.666406	insig
XMW0698	GC-MS	C15H24	1,4-Methano-1H-indene, octahydro-4-methyl-8-methylene-7-(1-methylethyl)-, [1S-(1.alpha.,3a.beta.,4.alpha.,7.alpha.,7a.beta.)]-	Terpenoids	-	3650-28-0	7231.73	5594.91	7087.17	48808.3	58310.8	48479.2	1.09941	0.00420616	7.81359	2.96599	up
NMW0006	GC-MS	C10H14O	2-Cyclohexen-1-one, 3-methyl-6-(1-methylethylidene)-	Terpenoids	-	491-09-8	70397.8	48226	93245.6	10679.1	14045.6	10618.4	1.07432	0.044537	0.166816	-2.58367	down
NMW0144	GC-MS	C10H16O2	Neric Acid	Terpenoids	-	4613-38-1	888573	944503	853253	10213.2	7166.06	5755.99	1.10182	0.000871709	0.0086122	-6.8594	down
KMW0512	GC-MS	C15H24	.alpha.-Cubebene	Terpenoids	-	17699-14-8	47785	57704.2	49219.8	8854.62	7519.59	5740.77	1.09338	0.00275981	0.142946	-2.80646	down
KMW0513	GC-MS	C11H20O	2-Undecenal	Aldehyde	-	2463-77-6	19910.5	26880.4	22519.8	8303.36	7057.24	7867.75	1.08675	0.0147722	0.335134	-1.57719	down
KMW0516	GC-MS	C12H20O2	.alpha.-Terpinyl acetate	Ester	-	80-26-2	5968.48	7674.8	6547.42	1647.44	913.952	1060.88	1.07863	0.00291799	0.179403	-2.47872	down
XMW0702	GC-MS	C9H7NS	2-(3-Thienyl)pyridine	Heterocyclic compound	-	21298-55-5	4675.98	3256.57	2802.69	18460.3	18413.2	18312.3	1.08692	0.00136735	5.14062	2.36194	up
KMW0517	GC-MS	C11H20O	2-Undecenal, E-	Aldehyde	-	53448-07-0	890786	755058	722074	27113.3	19296.5	12410.9	1.09579	0.00425602	0.0248407	-5.33115	down
XMW0174	GC-MS	C12H14O2	2,2'-Ethylidenebis(5-methylfuran)	Heterocyclic compound	-	3209-79-8	24789.1	28921.8	23095.8	111285	113324	82348	1.08813	0.0144688	3.99648	1.99873	up
XMW0041	GC-MS	C11H14O2	Benzene, 1,2-dimethoxy-4-(1-propenyl)-	Aromatics	-	93-16-3	898522	650125	665557	462955	524175	526413	0.945382	0.0925154	0.68356	-0.548859	insig
XMW0195	GC-MS	C15H26	1H-Cycloprop[e]azulene, decahydro-1,1,4,7-tetramethyl-, [1aR-(1a.alpha.,4.beta.,4a.beta.,7.beta.,7a.beta.,7b.alpha.)]-	Terpenoids	-	28580-43-0	399827	348497	461212	4.37901e+06	3.82698e+06	2.46148e+06	1.0882	0.0308076	8.81948	3.14069	up
XMW1222	GC-MS	C7H6Cl2O3	2,4-Dioxabicyclo[3.2.0]hept-6-en-3-one, 1,5-dichloro-6,7-dimethyl-	Ketone	-	35436-20-5	40344.7	27513.3	35256.4	6.11801e+06	5.2564e+06	3.27225e+06	1.10075	0.0288998	142.043	7.15018	up
NMW0167	GC-MS	C8H8O3	Resorcinol monoacetate	Ester	-	102-29-4	162340	207224	167266	838164	835951	615025	1.08826	0.0132196	4.26419	2.09227	up
XMW1412	GC-MS	C15H24	1H-3a,7-Methanoazulene, 2,3,4,7,8,8a-hexahydro-3,6,8,8-tetramethyl-, (3R,3aS,7S,8aR)-	Terpenoids	-	65354-33-8	43340.6	41554.2	46244.1	205171	254194	196733	1.09866	0.00998938	5.00308	2.32282	up
XMW0856	GC-MS	C10H12O2	1-Butanone, 2-hydroxy-1-phenyl-	Ketone	-	16183-46-3	340076	327384	362775	2.09656e+06	2.60699e+06	1.95134e+06	1.09949	0.010897	6.45959	2.69144	up
XMW0728	GC-MS	C12H16O	Benzenemethanol, 4-methyl-.alpha.-(1-methyl-2-propenyl)-, (R*,R*)-	Alcohol	-	83173-76-6	134897	143162	154016	496614	608557	456488	1.09326	0.0132919	3.61433	1.85373	up
D388	GC-MS	C12H16O2	Butanoic acid, 1-phenylethyl ester	Ester	-	3460-44-4	22244.7	12619.7	13585.6	4.78525e+06	4.10604e+06	2.56898e+06	1.10019	0.0284373	236.538	7.88593	up
NMW0175	GC-MS	C11H16O	Phenol, 4-(1,1-dimethylpropyl)-	Phenol	-	80-46-6	10515.4	13107	11794.4	26496.8	27316.8	23999	1.0858	0.000518648	2.19705	1.13557	up
XMW0470	GC-MS	C10H14N2	1-ButanAmine, N-(2-pyridinylmethylene)-	Heterocyclic compound	-	7032-24-8	2586.73	3928.98	4334.71	14237.8	12140.2	8927.31	1.04236	0.0243308	3.25382	1.70213	up
XMW0743	GC-MS	C15H24	(-)-Aristolene	Terpenoids	-	6831-16-9	9	9	9	148292	160584	107245	1.10454	0.0132504	15411.9	13.9118	up
XMW0143	GC-MS	C15H24	1H-3a,7-Methanoazulene, 2,3,4,7,8,8a-hexahydro-3,6,8,8-tetramethyl-, [3R-(3.alpha.,3a.beta.,7.beta.,8a.alpha.)]-	Terpenoids	-	469-61-4	58891.5	46703.1	40371.1	26521.1	28463	38545	0.901193	0.0645439	0.64076	-0.642143	insig
KMW0544	GC-MS	C11H14O2	Methyleugenol	Phenol	-	93-15-2	13110.3	48508.6	43612.3	163513	170892	143920	0.984326	0.00123174	4.54547	2.18443	insig
KMW0547	GC-MS	C12H18O2	2-Cyclohexen-1-ol, 2-methyl-5-(1-methylethenyl)-, acetate	Ester	-	97-42-7	4496.64	4878.15	4430.74	9395.72	7074.59	6285.67	0.987393	0.0824108	1.64832	0.721	insig
XMW1173	GC-MS	C4H6O2S2	Acetic Acid, [(1-thioxoethyl)thio]-	Acid	-	17930-82-4	4669	5528.09	6666.27	35437.3	35840.5	20718.8	1.07283	0.0357344	5.45541	2.44769	up
XMW0744	GC-MS	C12H20O	2,6-Dodecadien-1-al	Aldehyde	-	21662-13-5	4679.81	3413.3	4402.02	299226	322955	215129	1.10188	0.0138532	67.0108	6.06632	up
w45	GC-MS	C14H28	2-Tetradecene, (E)-	Hydrocarbons	-	35953-54-9	5759.99	6784.41	5993	11431.5	12499.5	8189.19	0.983683	0.0659245	1.73272	0.793038	insig
KMW0554	GC-MS	C13H20O	.alpha.-Ionone	Terpenoids	-	127-41-3	76775.8	56350	57675	60651.5	63837.8	55289.4	0.253105	0.644132	0.942232	-0.0858455	insig
NMW0183	GC-MS	C7H8O2	Benzenemethanol, 4-hydroxy-	Alcohol	-	623-05-2	52735.3	71624.9	60271.1	4745.3	4466.53	2673.61	1.09281	0.00826911	0.064374	-3.95738	down
D344	GC-MS	C11H18O	(E,E)-2,4-Undecadienal	Aldehyde	-	30361-29-6	9	9	9	596545	678508	443514	1.1046	0.0141452	63650.6	15.9579	up
XMW0468	GC-MS	C15H24	Bicyclo[3.1.1]hept-2-ene, 2,6-dimethyl-6-(4-methyl-3-pentenyl)-	Terpenoids	-	17699-05-7	9	9	9	57600.8	61021.3	33392.1	1.10386	0.0282205	5630.16	12.459	up
D249	GC-MS	C11H14O3	Ethanol, 2-phenoxy-, propanoate	Ester	-	23495-12-7	2359.86	2341.56	1972.66	86627.8	99399	62232.3	1.10118	0.0178302	37.1975	5.21713	up
NMW0188	GC-MS	C9H8O2	2-Propenoic Acid, 3-phenyl-	Acid	-	621-82-9	2044.59	1392.14	1223.25	129863	144951	78324.3	1.09809	0.0288366	75.781	6.24376	up
XMW0802	GC-MS	C8H8N2O	2-Hydroxymethylbenzimidazole	Heterocyclic compound	-	22128-99-0	9	9	9	13340.9	14762.8	8294.38	1.10361	0.0252176	1348.08	10.3967	up
XMW0797	GC-MS	C15H24	Naphthalene, 1,2,4a,5,6,8a-hexahydro-4,7-dimethyl-1-(1-methylethyl)-,[1R-(1.alpha.,4a.alpha.,8a.alpha.)]-	Terpenoids	-	17627-24-6	11370.9	14692.9	10996.4	65455	70138	45926	1.08334	0.0207323	4.89795	2.29218	up
XMW0129	GC-MS	C8H15NO2	1H-Pyrrolizine-1-methanol, hexahydro-7-hydroxy-, [1S-(1.alpha.,7.alpha.,7a.beta.)]-	Heterocyclic compound	-	520-62-7	4874.1	5812.14	2974.35	18018.8	21591.3	14288.8	1.04828	0.014088	3.94557	1.98023	up
NMW0190	GC-MS	C12H23N	CyclohexanAmine, N-cyclohexyl-	Amine	-	101-83-7	575.01	502.339	1434.79	51207	57189.4	39292.4	1.08984	0.0114107	58.7901	5.8775	up
XMW0745	GC-MS	C11H20O2	2(3H)-Furanone, 5-hexyldihydro-4-methyl-, trans-	Heterocyclic compound	-	147254-33-9	79531.5	79247	67897.3	31251.2	31031.6	24526	1.08334	0.00137335	0.382965	-1.38472	down
NMW0197	GC-MS	C8H8O3	Benzoic Acid, 4-methoxy-	Acid	-	100-09-4	31256.3	33634.1	29393.2	29393	30418.3	18155	0.584611	0.298686	0.826933	-0.274157	insig
XMW0212	GC-MS	C8H9NO2	1,4 Benzodioxan-6-amine	Heterocyclic compound	-	22013-33-8	153655	156766	129937	3984.89	3482.5	1303.12	1.08725	0.00320829	0.0199168	-5.64987	down
XMW0045	GC-MS	C15H24	(1R,4R,4aS,8aR)-4,7-Dimethyl-1-(prop-1-en-2-yl)-1,2,3,4,4a,5,6,8a-octahydronaphthalene	Terpenoids	-	92692-39-2	67000.1	61961.9	58530	1.70606e+06	1.80683e+06	1.00762e+06	1.09723	0.0289533	24.1104	4.59158	up
XMW0419	GC-MS	C15H32	Tetradecane, 2-methyl-	Hydrocarbons	-	1560-95-8	71004.1	60205	58660.4	61173.2	59450.5	54067.1	0.548825	0.333925	0.920057	-0.120205	insig
D456	GC-MS	C12H24O	8-Dodecen-1-ol, (Z)-	Alcohol	-	40642-40-8	16385.8	14727.7	15297.8	4737.66	5147.75	4693.43	1.10181	0.00100311	0.314123	-1.6706	down
XMW0987	GC-MS	C15H22	Eudesma-2,4,11-triene	Terpenoids	-	82462-31-5	507968	370926	369507	215888	234827	237621	1.03459	0.0526805	0.551374	-0.858897	insig
NMW0210	GC-MS	C8H7NO3	Furo[3,4-c]pyridin-1(3H)-one, 7-hydroxy-6-methyl-	Heterocyclic compound	-	4753-19-9	2.10308e+06	1.53301e+06	1.50492e+06	885945	954487	964767	1.0341	0.0551957	0.545651	-0.873951	insig
KMW0585	GC-MS	C14H26O2	Citronellyl isobutyrate	Ester	-	97-89-2	1.72677e+06	1.29373e+06	1.34332e+06	685834	736280	722261	1.06804	0.0312556	0.491399	-1.02503	down
XMW1091	GC-MS	C10H20O3	1-Pentanol, 5-[(tetrahydro-2H-pyran-2-yl)oxy]-	Heterocyclic compound	-	76102-74-4	103147	76501	87956.2	88613.1	81912.9	76537.4	0.396095	0.482182	0.923243	-0.115217	insig
D246	GC-MS	C14H24O2	Propanoic acid, 2-methyl-, 3,7-dimethyl-2,6-octadienyl ester, (Z)-	Ester	-	2345-24-6	878414	623757	632841	388370	416728	414247	1.02	0.0656095	0.571119	-0.808137	insig
NMW0213	GC-MS	C10H10N2	Nicotyrine	Heterocyclic compound	-	487-19-4	19101.4	14019.3	14342	8382.26	8985.66	9063.38	1.04089	0.0486079	0.556885	-0.844549	insig
XMW0548	GC-MS	C15H24	Bicyclo[7.2.0]undecane, 10,10-dimethyl-2,6-bis(methylene)-, [1S-(1R*,9S*)]-	Terpenoids	-	136296-38-3	715617	515488	515769	309865	332225	335393	1.02803	0.0594579	0.559562	-0.83763	insig
XMW0742	GC-MS	C15H24	10,10-Dimethyl-2,6-dimethylenebicyclo[7.2.0]undecane	Terpenoids	-	357414-37-0	9	9	9	120132	131823	70576.7	1.10399	0.0291675	11945.6	13.5442	up
WMW0007	GC-MS	C15H24	[1S-(1.alpha.,7.alpha.,8a.beta.)]-1,2,3,5,6,7,8,8a-octahydro-1,4-dimethyl-7-(1-methylethenyl)-Azulene	Terpenoids	-	3691-11-0	5723.58	3720.29	2223.04	6298.23	5905.14	4630.78	0.661386	0.22763	1.4429	0.528969	insig
NMW0214	GC-MS	C9H10O2	3-(4-Hydroxyphenyl)propanal	Aldehyde	-	20238-83-9	84617.6	62449.2	66710.4	38507.9	40315.5	42407	1.04477	0.0419641	0.567088	-0.818356	insig
KMW0583	GC-MS	C13H20O	trans-.beta.-Ionone	Terpenoids	-	79-77-6	911759	620017	596447	323686	334860	329874	1.03835	0.0642848	0.464435	-1.10645	down
D328	GC-MS	C15H22	(5R,10R)-10-Methyl-6-methylene-2-(propan-2-ylidene)spiro[4.5]dec-7-ene	Terpenoids	-	28908-27-2	17588.9	16344.4	15472.7	8756.91	9271.02	8772.36	1.09467	0.00413272	0.542451	-0.882434	insig
NMW0216	GC-MS	C9H10O3	BenzAldehyde, 3,4-dimethoxy-	Aldehyde	-	120-14-9	586071	425311	415715	246267	264999	268111	1.03129	0.0576658	0.546128	-0.872689	insig
KMW0602	GC-MS	C15H32	Pentadecane	Hydrocarbons	-	629-62-9	60422.2	73149	58301.4	25696.4	25406.1	23142.9	1.08991	0.0118001	0.386951	-1.36978	down
XMW1189	GC-MS	C8H8O4	Benzoic acid, 3,5-dihydroxy-, methyl ester	Ester	-	2150-44-9	586943	779491	591049	40469.6	35747.1	23433	1.09569	0.00999312	0.0509071	-4.29599	down
D293	GC-MS	C15H24	Cyclohexene, 4-[(1E)-1,5-dimethyl-1,4-hexadien-1-yl]-1-methyl-	Terpenoids	-	25532-79-0	5543.13	2909.01	4229.29	17923.4	27677	16557.2	1.05599	0.0370858	4.90146	2.29321	up
D216	GC-MS	C14H22O	.alpha.-Irone	Terpenoids	-	79-69-6	6081.48	6305.74	7832.2	18806.5	16961.5	11317.5	1.01972	0.0508163	2.32873	1.21954	up
XMW0049	GC-MS	C14H24O	2,4,4-Trimethyl-3-(3-methylbutyl)cyclohex-2-enone	Ketone	-	88725-82-0	18868.6	13675.7	11982.9	35903.1	33903	34692.9	1.05503	0.0070107	2.34686	1.23073	up
KMW0610	GC-MS	C15H26O2	Bornyl isovalerate	Ester	-	76-50-6	138812	107724	109189	101804	92092.8	87435.3	0.854799	0.119617	0.790868	-0.338491	insig
KMW0612	GC-MS	C11H12O3	1,3-Benzodioxole, 4-methoxy-6-(2-propenyl)-	Aromatics	-	607-91-0	57134.5	43357.7	50655.9	9	9	9	1.10465	0.00618268	0.000178633	-12.4507	down
XMW0054	GC-MS	C15H24O	Farnesene epoxide, E-	Terpenoids	-	83637-40-5	34367.6	31582	47832.5	1732.89	2309.59	1938.46	1.09913	0.01885	0.0525649	-4.24976	down
XMW1006	GC-MS	C15H24O	(1S,4R,7S,8R,11R,13R)-4,7,11-Trimethyl-5-oxatetracyclo[5.4.2.01,8.04,13]tridecane	Terpenoids	-	18319-31-8	7.3655e+06	8.05475e+06	7.1222e+06	8.16628e+06	7.45878e+06	6.24624e+06	0.214881	0.74509	0.970228	-0.0436047	insig
NMW0241	GC-MS	C6H10N4	Pentylenetetrazol	Heterocyclic compound	-	54-95-5	18285.1	21454.4	19203.2	4217.84	4536.5	3841.37	1.10054	0.00263535	0.213694	-2.22638	down
KMW0622	GC-MS	C15H24	Cyclohexene, 3-(1,5-dimethyl-4-hexenyl)-6-methylene-, [S-(R*,S*)]-	Terpenoids	-	20307-83-9	46207.5	50914.5	45460.7	110004	101270	115482	1.09613	0.00152152	2.29169	1.19641	up
XMW1354	GC-MS	C12H22O2	cis-5-Dodecenoic Acid	Acid	-	2430-94-6	17389.7	14644.5	15037.7	7465.97	8467.16	6738.7	1.07596	0.00290136	0.481643	-1.05397	down
XMW1417	GC-MS	C14H26O2	Octanoic acid, 3-hexenyl ester, (Z)-	Ester	-	61444-41-5	2996.65	2680.3	2064.11	211515	174756	139071	1.10174	0.0143644	67.8645	6.08458	up
KMW0623	GC-MS	C15H24	1,5-Cyclodecadiene, 1,5-dimethyl-8-(1-methylethylidene)-, (E,E)-	Terpenoids	-	15423-57-1	6090.2	8382.98	7283.37	6099.23	6301.13	5753.38	0.739062	0.206641	0.834403	-0.261184	insig
WMW0043	GC-MS	C15H26O	d-Nerolidol	Terpenoids	-	142-50-7	397195	432356	384808	467494	429002	365226	0.234033	0.666888	1.039	0.0551995	insig
XMW0471	GC-MS	C13H16O2	3-Hexen-1-ol, benzoate, (Z)-	Ester	-	25152-85-6	117701	100775	130233	11134.4	13888.3	11045.3	1.10011	0.00615187	0.103433	-3.27323	down
NMW0244	GC-MS	C12H18O	Phenol, 4-hexyl-	Phenol	-	2446-69-7	262062	265091	284746	138109	173003	114491	1.03566	0.00860191	0.524207	-0.931792	insig
XMW0809	GC-MS	C13H16O2	1,3-Pentanedione, 4,4-dimethyl-1-phenyl-	Ketone	-	13988-67-5	8731.39	8802.73	8015.03	140179	123904	105480	1.10269	0.00752436	14.4648	3.85447	up
XMW0813	GC-MS	C12H17NO	Pentanal O-benzyloxime	Nitrogen compounds	-	72399-21-4	9	9	9	60911.7	50908.6	41099.8	1.10455	0.0123607	5663.71	12.4675	up
XMW0031	GC-MS	C15H26O	1,4-Methanoazulen-3-ol, decahydro-1,5,5,8a-tetramethyl-, [1S-(1.alpha.,3.beta.,3a.beta.,4.alpha.,8a.beta.)]-	Terpenoids	-	99481-30-8	24012.4	29942.1	28458.4	149655	123073	102641	1.0898	0.0175211	4.55474	2.18737	up
XMW0550	GC-MS	C7H8N4	N-Cyanomethyl-2-cyanimino-pyrrolidine	Heterocyclic compound	-	134881-46-2	9	9	9	95683.7	77191	63427.3	1.10455	0.013788	8751.93	13.0954	up
XMW1169	GC-MS	C15H26O2	Butanoic acid, 2-methyl-, 3,7-dimethyl-2,6-octadienyl ester, (E)-	Ester	-	68705-63-5	9001.15	8252.92	7211.93	1.53554e+06	1.26941e+06	1.03089e+06	1.10351	0.0129062	156.782	7.29262	up
WMW0149	GC-MS	C15H26O	Cedrol	Terpenoids	-	77-53-2	4730.18	6288.05	5469.13	9088.77	6424.77	5655.93	0.648136	0.270726	1.28398	0.360625	insig
XMW0156	GC-MS	C15H26O	Spiro[4.5]decan-7-one, 1,8-dimethyl-4-(1-methylethyl)-	Ketone	-	39510-26-4	1.18744e+06	1.33168e+06	1.20032e+06	9	9	9	1.10482	0.00137881	7.25917e-06	-17.0718	down
D446	GC-MS	C13H20O3	Octanoic acid, 2-furanylmethyl ester	Ester	-	39252-03-4	19311.1	19167	14237.3	3.01611e+06	2.50515e+06	1.96498e+06	1.10275	0.0146686	142.012	7.14987	up
D320	GC-MS	C15H26O	(3E,7E)-1,5,5,8-Tetramethylcycloundeca-3,7-dienol	Terpenoids	-	28446-26-6	10777.8	10562.8	10989.1	12737.4	11437.8	11048.4	0.762238	0.194379	1.08951	0.123681	insig
XMW1017	GC-MS	C16H28	1,E-11,Z-13-Hexadecatriene	Hydrocarbons	-	80634-97-5	48747.9	46692.7	47362	2873.77	3659.45	4005.31	1.10189	5.78533e-06	0.0737979	-3.76028	down
KMW0646	GC-MS	C15H28O2	Citronellyl valerate	Ester	-	7540-53-6	79694.7	102080	87163.4	18577.7	16686	17506.3	1.09961	0.00790117	0.196216	-2.34948	down
XMW0111	GC-MS	C15H24O2	Spiro[4.5]decan-7-one, 1,8-dimethyl-8,9-epoxy-4-isopropyl-	Terpenoids	-	61050-91-7	11646.2	9284.56	11237.8	6059.42	5769.79	6461.69	1.06502	0.0181132	0.568596	-0.814525	insig
NMW0269	GC-MS	C15H16	Benzene, 1,1'-(1,3-propanediyl)bis-	Aromatics	-	1081-75-0	14845.9	16350.1	15823.5	2530.68	1891.22	2463.3	1.09923	0.000165649	0.146433	-2.77169	down
XMW0230	GC-MS	C19H40	Pentadecane, 2,6,10,14-tetramethyl-	Hydrocarbons	-	1921-70-6	118598	87324.3	84159	39219.2	35196.5	28785.1	1.06462	0.0231589	0.355765	-1.491	down
XMW0130	GC-MS	C15H30O2	Heptanoic acid, octyl ester	Ester	-	5132-75-2	9	9	9	2051.1	1536.38	1593.98	1.10428	0.00886159	191.906	7.58426	up
w24	GC-MS	C13H20O3	3-Buten-2-one, 4-(4-hydroxy-2,2,6-trimethyl-7-oxabicyclo[4.1.0]hept-1-yl)-	Ketone	-	38274-01-0	16070.8	15522.7	14512.1	96233.1	102834	85354	1.1024	0.00385547	6.16891	2.62501	up
KMW0674	GC-MS	C12H24O	trans-2-Dodecen-1-ol	Alcohol	-	69064-37-5	151979	113322	109689	66490.1	72606	72743	1.03134	0.0537145	0.564918	-0.823885	insig
KMW0678	GC-MS	C15H26O	4,8-Methanoazulen-9-ol, decahydro-2,2,4,8-tetramethyl-, stereoisomer	Terpenoids	-	4586-22-5	34549.8	36997.4	34086.2	3101.89	4121.51	3414.61	1.10178	0.000264523	0.100707	-3.31177	down
NMW0311	GC-MS	C10H13NO2	Phenacetin	Amine	-	62-44-2	1281.32	9	1070.97	65611.6	67320.3	52687.9	0.954854	0.00539865	78.6094	6.29663	insig
KMW0684	GC-MS	C12H22O2	.delta.-Dodecalactone	Ester	-	713-95-1	9	9	9	8183.2	6735.3	7485.43	1.10472	0.00312668	829.775	9.69658	up
KMW0685	GC-MS	C15H26O	trans-Farnesol	Terpenoids	-	106-28-5	20402.3	12841.9	13676.7	130228	132253	108120	1.09247	0.00271965	7.89842	2.98156	up
NMW0322	GC-MS	C10H10O3	Coniferyl aldehyde	Aldehyde	-	458-36-6	10028.9	12021.3	9232.12	8712.68	8621.23	9080	0.791343	0.186589	0.844372	-0.24405	insig
KMW0687	GC-MS	C15H26O	1H-Cycloprop[e]azulen-4-ol, decahydro-1,1,4,7-tetramethyl-, [1aR-(1a.alpha.,4.beta.,4a.beta.,7.alpha.,7a.beta.,7b.alpha.)]-	Terpenoids	-	552-02-3	1766.64	3805.98	2303.11	16827.3	15495.6	21762.7	1.0713	0.00949909	6.86739	2.77976	up
D120	GC-MS	C15H20O	Octanal, 2-(phenylmethylene)-	Acid	-	101-86-0	2.2364e+06	323690	1.52924e+06	9100.55	7859.45	9728.04	1.07193	0.136135	0.00652627	-7.25953	down
XMW0118	GC-MS	C15H22O	1-Naphthalenol, 5,6,7,8-tetrahydro-2,5-dimethyl-8-(1-methylethyl)-	Phenol	-	55012-72-1	231990	275627	218875	271.48	240.945	242.151	1.1045	0.00499081	0.00103866	-9.91107	down
XMW0834	GC-MS	C13H12O3	3,5-Dihydroxy-4'-methoxydiphenyl	Alcohol	-	54960-96-2	1.85055e+07	2.35707e+07	1.99008e+07	15252.5	13548.2	6685.51	1.10185	0.00530961	0.000572571	-10.7703	down
NMW0347	GC-MS	C16H26O2	2,6,10-Dodecatrienoic acid, 3,7,11-trimethyl-, methyl ester, (E,E)-	Ester	-	3675-00-1	1.15478e+06	195187	854977	2379	1893	2862	1.08257	0.122726	0.00323545	-8.27182	down
NMW0353	GC-MS	C9H9NO3	Hippuric Acid	Acid	-	495-69-2	112882	129277	113160	2489	2593.25	2302.03	1.10432	0.00217147	0.0207821	-5.58851	down
XMW0308	GC-MS	C15H24O	4-Nonylphenol	Aromatics	-	104-40-5	26015.6	27297.5	27592.7	1543	2388.94	1476.01	1.09782	1.07229e-05	0.0668426	-3.90309	down
NMW0362	GC-MS	C17H21N	BenzphetAmine	Amine	-	156-08-1	1359.42	1072.58	686.02	67576.9	52175.3	49052.1	1.09832	0.0105105	54.1384	5.75858	up
XMW0086	GC-MS	C11H10O2S	3-(Benzo(b)thien-6-yl)propionic Acid	Heterocyclic compound	-	6701-52-6	398550	399034	397061	1.11968e+07	8.30181e+06	7.71152e+06	1.10213	0.0150748	22.7767	4.50949	up
NMW0383	GC-MS	C17H21NO	Benadryl	Amine	-	58-73-1	66083.6	71640	75319.4	350.086	975.141	810.647	1.09524	0.00138967	0.0100256	-6.64017	down
NMW0400	GC-MS	C7H8N2O2	3-Pyridinecarboxamide, 1,6-dihydro-1-methyl-6-oxo-	Heterocyclic compound	-	701-44-0	7048.6	9851.7	7266.38	5683.83	4960.08	4964.96	0.970241	0.0780882	0.645884	-0.630654	insig
XMW1052	GC-MS	C15H23NO	2(1H)-Pyridinone, 1-cyclohexyl-3,4,5,6-tetramethyl-	Heterocyclic compound	-	82754-44-7	54323.1	64124.7	53286	1067.32	807.292	716.08	1.10247	0.00370379	0.0150855	-6.05069	down
XMW1441	GC-MS	C12H15N3S	Thiazol-2-Amine, N-(4-dimethylaminobenzyl)-	Heterocyclic compound	-	13159-95-0	98346.9	116876	102698	12331.3	8459.86	8728.99	1.09791	0.00231089	0.0928537	-3.4289	down
KMW0719	GC-MS	C20H42	Eicosane	Hydrocarbons	-	112-95-8	26607.2	30843.5	33374.4	9	9	9	1.1047	0.00422729	0.000297274	-11.7159	down
NMW0435	GC-MS	C8H8N2O3S	Zonisamide	Heterocyclic compound	-	68291-97-4	180264	227410	196639	412.042	846.701	777.813	1.10132	0.00470202	0.00337003	-8.21302	down
NMW0273	GC-MS	C9H10O2	Phenol, 4-(3-hydroxy-1-propenyl)-	Alcohol	-	3690-05-9	11108.4	9580.96	10439.7	4375.83	3785.68	3913.48	1.09543	0.00170689	0.387902	-1.36624	down
GMW0087	GC-MS	C10H18O	(E)-2-Decenal	Aldehyde	-	3913-81-3	10456.6	12941.6	12269.7	14693	12893.6	15389	0.826517	0.0812445	1.20488	0.268887	insig
IS-08	GC-MS	C6H5DO	[2H]-Phenol	Phenol	-	1003-66-3	1.8288e+06	1.92828e+06	1.90626e+06	2.18426e+06	2.26262e+06	2.27573e+06	1.07383	0.00106448	1.18704	0.247368	insig

## Sheet: Table S2
Table S2. Organosulfur compounds identified and quantified between raw garlic and aged garlic.
Compounds	Class I	raw garlic-1	raw garlic-2	raw garlic-3	aged garlic-1	aged garlic-2	aged garlic-3	VIP	P-value	Log2FC	Type
Metabolites
S-Ribosyl-L-homocysteine	Amino acids and derivatives	9798.85	8159.56	9559.17	49131	50664.6	41226.4	1.09894	0.00484675	2.35749	up
4-Methyl-5-thiazoleethanol	Others	14573.2	32093.8	40361.1	375782	343901	233856	1.06485	0.0188897	3.45374	up
N-Formyl-L-Methionine	Amino acids and derivatives	14555.1	6592.09	17584.3	1.75196e+06	1.69439e+06	1.52318e+06	1.09659	0.00170712	7.00346	up
2-Aminoethanesulfonic acid	Organic acids	73116.5	65014.1	63851.6	637738	866344	548339	1.09675	0.0226762	3.34503	up
S-Sulfo-L-Cysteine	Amino acids and derivatives	13777.1	4721.21	2533.55	2.1944e+06	2.17068e+06	2.58853e+06	1.0902	0.00340358	8.36904	up
3-Amino-1-propionic sulfonic acid	Organic acids	28822.6	20540.6	74740.7	2.64651e+06	3.97703e+06	3.41178e+06	1.08745	0.013217	6.33739	up
S-Allyl-L-cysteine	Amino acids and derivatives	126361	153656	234222	3.3437e+06	2.96276e+06	2.27066e+06	1.09253	0.0126844	4.05998	up
Methanesulfonic acid	Organic acids	293504	226855	365026	3.99138e+06	5.56807e+06	4.59758e+06	1.0967	0.0101713	3.99907	up
Oxiglutatione	Amino acids and derivatives	389210	299014	231395	4734.83	6957.51	4996.42	1.09976	0.0222774	-5.78409	down
S-(Methyl)glutathione	Amino acids and derivatives	1.13726e+06	1.07517e+06	1.21908e+06	238325	249068	140007	1.07892	8.34028e-05	-2.45138	down
L-Homomethionine	Amino acids and derivatives	1.28228e+06	745089	917743	77075.5	20755.4	36601	1.06959	0.0262875	-4.45338	down
S-(5'-Adenosyl)-L-methionine	Amino acids and derivatives	1.63774e+06	1.63681e+06	2.92547e+06	92180.6	386203	86399.7	1.02524	0.0424692	-3.4565	down
γ-glutamylmethionine	Amino acids and derivatives	2.21859e+06	2.40023e+06	2.28852e+06	77764.7	42337.2	26782.4	1.09095	0.000224922	-5.55538	down
L-Cysteinyl-L-glycine	Amino acids and derivatives	2.52468e+06	6.9545e+06	5.18663e+06	58838.8	71790	44120.3	1.09217	0.0642604	-6.39103	down
γ-L-Glutamyl-S-(trans-1-propenyl)-L-cysteine	Amino acids and derivatives	3.16634e+06	3.35898e+06	3.3923e+06	1.00909e+06	869637	794845	1.09778	1.54861e-05	-1.89123	down
γ-L-Glutamyl-S-allyl-L-cysteine	Amino acids and derivatives	3.43963e+06	3.44361e+06	3.56616e+06	1.00845e+06	814590	771565	1.09685	4.64023e-05	-2.00984	down
Thiamine (Vitamin B1)	Others	3.62454e+06	3.43449e+06	2.39546e+06	192426	210929	151041	1.09729	0.0160141	-4.09201	down
γ-L-Glutamyl-S-methyl-L-cysteine	Amino acids and derivatives	5.34432e+06	6.01394e+06	7.29778e+06	738907	684604	377560	1.08399	0.00830862	-3.37272	down
L-Methionine	Amino acids and derivatives	5.94343e+06	5.20615e+06	7.25964e+06	2.9798e+06	1.33897e+06	1.50048e+06	1.00898	0.00653607	-1.66152	down
S-Adenosylmethionine	Amino acids and derivatives	1.50612e+07	6.24079e+06	8.2127e+06	2466.28	9	8751.9	1.01124	0.0665722	-11.3602	down
S-(2-Carboxypropyl)cysteine	Amino acids and derivatives	1.67606e+07	2.42915e+07	1.53904e+07	4.16307e+06	3.77351e+06	3.42548e+06	1.08504	0.0316336	-2.31256	down
S-1-Propenyl-L-cysteine	Amino acids and derivatives	2.06021e+07	2.10872e+07	1.98938e+07	718667	706027	569672	1.10361	0.000240028	-4.94853	down
3-(Allylsulphinyl)-L-alanine	Amino acids and derivatives	3.98493e+07	4.23528e+07	5.11085e+07	3.06162e+06	4.2238e+06	6.29699e+06	1.0859	0.00458015	-3.29498	down
6-Methylmercaptopurine	Nucleotides and derivatives	26312.6	28965.5	15552.2	51697.8	37960.5	34040.4	0.864659	0.0632828	0.804391	insig
L-Methionine Sulfoxide	Amino acids and derivatives	665486	706503	706034	601471	643229	351114	0.67374	0.218108	-0.380918	insig
L-Homocysteine	Amino acids and derivatives	358093	384540	405331	625472	509996	577556	1.04358	0.0186477	0.577467	insig
L-Cystine	Amino acids and derivatives	412053	441327	499375	603366	783418	1.02307e+06	0.952761	0.0954245	0.833045	insig
L-Homocystine	Amino acids and derivatives	143126	201988	259968	154920	122400	149895	0.721605	0.215069	-0.502171	insig
S-(5'-Adenosy)-L-homocysteine	Amino acids and derivatives	146234	178907	206811	320314	371646	231936	0.934682	0.0683651	0.796434	insig
DL-Methionine	Amino acids and derivatives	6.101e+06	5.95182e+06	9.13752e+06	3.43982e+06	1.55018e+06	1.69399e+06	0.995276	0.0240898	-1.66462	insig
S-Methyl-L-cysteine	Amino acids and derivatives	1.59327e+07	1.61487e+07	2.18569e+07	1.47407e+07	1.37193e+07	1.52094e+07	0.754946	0.215632	-0.304687	insig
5'-Deoxy-5'-(methylthio)adenosine	Nucleotides and derivatives	2.80565e+07	2.03769e+07	2.73322e+07	4.18243e+07	3.03035e+07	1.8804e+07	0.298051	0.53541	0.263243	insig
Volitile compounds
Thieno[2,3-b]thiophene,2-methyl-	Heterocyclic compound	9	9	9	43122.4	48325.3	29546.9	1.10423	0.0187314	12.1297	up
Pyrazine, 2-methyl-3-(methylthio)-	Heterocyclic compound	9	9	9	57814.2	65206.3	37444.1	1.1041	0.0232558	12.537	up
2-Acetylthiazole	Heterocyclic compound	9	9	9	68510.4	78456.2	31459.3	1.10266	0.0532447	12.6901	up
2-Thiophenemethanethiol	Heterocyclic compound	9	9	9	12001.5	10798.6	14326	1.10451	0.00693571	10.4253	up
Ethyl 2-hydroxybenzyl sulfone	Phenol	3671.12	2083.71	2890.37	28716.4	31106.8	23028.6	1.09042	0.00752442	3.26056	up
2-(3-Thienyl)pyridine	Heterocyclic compound	4675.98	3256.57	2802.69	18460.3	18413.2	18312.3	1.08692	0.00136735	2.36194	up
Acetic Acid, [(1-thioxoethyl)thio]-	Acid	4669	5528.09	6666.27	35437.3	35840.5	20718.8	1.07283	0.0357344	2.44769	up
(E)-sec-Butyl propenyl diSulfur compounds	Sulfur compounds	27956.6	32220	25275.6	2.55612e+06	1.87781e+06	398627	1.05726	0.130948	5.82152	up
Thiophene, 2-methyl-	Heterocyclic compound	28450.1	25258.6	36039.5	333314	218348	186105	1.08504	0.0396031	3.03921	up
Cyclohexanone, 2-(1-mercapto-1-methylethyl)-5-methyl-	Ketone	37940.4	32240.1	43657.6	438973	375431	237499	1.08679	0.0339728	3.20795	up
Ethanone, 1-(2-thienyl)-	Heterocyclic compound	42970.7	39632.2	45778.5	148344	160109	82615.8	1.028	0.0673953	1.60698	up
Benzothiazole	Heterocyclic compound	52266.9	45423.9	35976.7	243310	282136	161690	1.07358	0.033148	2.36195	up
3-(Benzo(b)thien-6-yl)propionic Acid	Heterocyclic compound	398550	399034	397061	1.11968e+07	8.30181e+06	7.71152e+06	1.10213	0.0150748	4.50949	up
2-Thiopheneacetic acid	Heterocyclic compound	680591	888776	634321	1.64946e+06	1.6671e+06	1.15137e+06	1.00749	0.0304212	1.01969	up
Ethanone, 1-(2-methyl-1,3-dithiolan-2-yl)-	Heterocyclic compound	6846.64	7244.22	5520.88	1357.03	1789.77	1626.07	1.09047	0.00802905	-2.03879	down
Thiazole, 2,4-dimethyl-	Heterocyclic compound	48147	45636	55201	3045	3291	1653	1.09198	0.00291146	-4.221	down
Thiophene, 2-hexyl-	Heterocyclic compound	64281.2	58527.8	50339.4	21601.7	19994.9	12377.3	1.0524	0.00203177	-1.68168	down
Thiocyanic acid, phenylmethyl ester	Sulfur compounds	74019.3	89840.7	74913	42329	33189.1	22949.4	1.01975	0.00361476	-1.27792	down
Thiazol-2-Amine, N-(4-dimethylaminobenzyl)-	Heterocyclic compound	98346.9	116876	102698	12331.3	8459.86	8728.99	1.09791	0.00231089	-3.4289	down
Zonisamide	Heterocyclic compound	180264	227410	196639	412.042	846.701	777.813	1.10132	0.00470202	-8.21302	down
Mercaptoacetone	Ketone	133468	114516	145730	9	9	9	1.10473	0.00475283	-13.8319	down
Benzenemethanethiol	Sulfur compounds	525930	441593	445145	12695.9	14678.3	11614.6	1.10343	0.00356866	-5.17922	down
Thiocyanic acid, 2-propenyl ester	Others	7.23936e+06	5.01908e+06	6.69633e+06	1.15058e+06	1.44608e+06	1.297e+06	1.09038	0.0160318	-2.28336	down
Diallyl Sulfur compounds	Sulfur compounds	3.85274e+06	4.27398e+06	3.77113e+06	928663	550584	378115	1.0647	0.000120755	-2.67937	down
DiSulfur compounds, methyl 2-propenyl	Sulfur compounds	2.20073e+07	1.53547e+07	2.08865e+07	3.99144e+06	4.89233e+06	4.27727e+06	1.08898	0.0169139	-2.14595	down
TriSulfur compounds, methyl 2-propenyl	Sulfur compounds	7.61306e+07	7.9829e+07	8.71344e+07	4.07502e+07	4.32547e+07	2.60518e+07	1.02336	0.00428044	-1.14327	down
2-Isobutylthiazole	Heterocyclic compound	6304.97	7325.78	6112.48	12292.4	10658.1	10712.6	1.06652	0.00312689	0.769808	insig
Dimethyl triSulfur compounds	Sulfur compounds	1.46463e+06	1.36234e+06	1.93369e+06	2.90816e+06	3.68262e+06	2.556e+06	1.00282	0.0295798	0.942102	insig
3-Butylthiophene	Heterocyclic compound	1.31401e+06	1.12054e+06	1.2254e+06	723061	796676	777056	1.07595	0.00769458	-0.672199	insig
2-Methyl-3-furanthiol	Heterocyclic compound	2.46263e+06	2.45569e+06	2.29612e+06	3.02442e+06	2.87214e+06	3.31959e+06	1.02695	0.0236778	0.353279	insig

## Sheet: Table S3
Table S2. The relative abundance of fecal bacteria in the colon among different groups.
sample	Con_1	Con_2	Con_3	Con_4	Con_5	Con_6	Con_7	Con_8	Con_9	Con_10	Con_11	DSS_1	DSS_2	DSS_3	DSS_4	DSS_5	DSS_6	DSS_7	DSS_8	DSS_9	DSS+AG_1	DSS+AG_2	DSS+AG_3	DSS+AG_4	DSS+AG_5	DSS+AG_6	DSS+AG_7	DSS+AG_8	DSS+AG_9	DSS+5-ASA_1	DSS+5-ASA_2	DSS+5-ASA_3	DSS+5-ASA_4	DSS+5-ASA_5	DSS+5-ASA_6	DSS+5-ASA_7	DSS+5-ASA_8	DSS+5-ASA_9	DSS+5-ASA_10
Escherichia coli	-0.386785	-0.384634	-0.386785	-0.384972	-0.384088	-0.376719	-0.385091	-0.386785	-0.386252	-0.386785	-0.38464	4.27164	-0.340499	1.18375	1.92834	0.239093	3.11854	0.0735457	0.36214	0.53137	-0.326377	-0.385153	-0.364968	-0.383369	-0.386785	-0.379907	-0.385536	-0.384804	-0.386785	-0.386785	-0.384759	-0.378895	-0.381639	-0.384135	-0.375259	-0.386785	-0.383266	-0.311769	-0.377396
Lysinibacillus sphaericus	-0.522518	-0.516114	-0.522518	-0.522518	-0.522518	-0.508819	-0.522518	-0.522518	-0.522518	-0.522518	-0.522518	1.04726	0.0856217	4.28413	0.634891	-0.370944	3.14604	1.47654	-0.12955	0.271141	-0.522518	-0.522518	0.118917	0.0832753	0.148262	-0.0906279	0.517186	-0.369719	-0.353904	-0.494168	-0.260553	-0.502586	-0.323057	-0.522518	-0.284266	0.0982161	-0.433118	-0.491607	-0.512236
Streptococcus equinus	-0.632282	-0.633099	-0.633177	-0.633319	-0.6286	-0.627619	-0.633157	-0.632595	-0.633396	-0.633735	-0.632421	0.485655	0.333341	2.02566	2.76892	0.672485	1.14656	2.7293	0.154633	2.40439	-0.630523	0.818235	-0.570642	-0.632944	-0.630497	-0.610411	-0.632346	-0.627925	-0.549637	-0.492152	0.193694	-0.351166	1.10603	-0.633976	0.180614	-0.399174	-0.530431	-0.335431	-0.438866
Alkaliphilus sp. 1-IA	-0.392133	-0.423649	-0.449575	-0.444221	-0.446511	-0.442349	-0.462432	-0.349125	-0.452034	-0.467529	-0.474675	0.325814	-0.387607	0.625019	0.0176157	-0.425882	-0.00704509	5.40414	0.582275	0.483708	-0.345021	-0.407533	-0.0314508	-0.42222	-0.410652	-0.346608	1.02758	-0.380989	-0.420252	-0.365544	0.813643	-0.244701	0.500873	-0.470641	1.13908	-0.371314	-0.368569	-0.346161	-0.363319
Faecalibaculum rodentium	0.750541	0.177794	0.218868	0.858155	0.28348	0.119308	0.311304	-0.217625	-0.150935	1.02926	-0.713189	0.23527	-0.717726	-0.695505	-0.678627	-0.730141	-0.690658	-0.612837	-0.735832	-0.659543	-0.74614	-0.732559	-0.760871	0.12616	0.443761	2.23461	1.65434	3.2625	-0.717573	-0.407876	-0.527159	-0.606886	-0.414592	-0.762221	-0.756302	0.179564	2.62355	-0.762819	-0.710855
Bifidobacterium breve	0.659128	0.216444	0.636219	0.573901	-0.164054	0.284817	0.11158	-0.152932	-0.139041	1.47204	-0.503572	-0.495823	-0.510907	-0.510907	-0.504678	-0.506308	-0.498778	-0.486815	-0.440008	-0.502192	-0.504372	-0.490973	-0.509853	-0.104781	-0.188343	0.558478	5.3767	-0.0683332	-0.494912	-0.302105	-0.31324	-0.321164	0.621596	-0.507023	-0.504852	-0.0347027	0.224135	-0.510907	-0.46346
Clostridium phoceensis	2.4547	1.19475	0.750431	0.139719	0.461791	1.27892	0.878967	4.07621	0.186489	-0.229749	-0.728614	-0.369558	0.437097	-0.447175	-0.783947	-0.783891	-0.63284	-0.816151	0.64913	-0.711626	-0.82987	0.7504	0.107932	-0.485046	-0.133596	-0.410766	-0.751149	-0.481558	-0.151386	0.12227	0.0563919	0.289326	-0.65692	-0.82987	-0.594112	-0.791282	-0.798938	-0.63403	-0.782438
Scatolibacter rhodanostii	3.52236	0.870065	1.7883	1.17713	-0.118758	1.18844	0.221749	3.4287	-0.0124457	-0.377006	-0.510267	-0.479328	-0.559328	-0.559328	-0.548867	-0.526557	-0.559328	-0.551878	-0.559328	-0.470615	-0.559328	-0.228188	0.852594	-0.340174	-0.127515	-0.343863	-0.503407	-0.468132	-0.0999463	-0.425094	-0.497154	-0.392406	-0.559328	-0.559328	-0.36664	-0.509698	-0.517334	-0.559328	-0.159437
Adlercreutzia equolifaciens	2.30692	1.03112	1.14519	1.43858	1.01258	-0.502241	1.01705	-0.226914	0.53701	0.216406	0.865133	2.0978	0.227413	-0.903885	-1.02698	-1.04381	-1.03717	-0.873079	-0.567142	-0.221905	-1.14005	-0.347342	-0.179185	-0.451039	-0.650693	2.51335	0.0554746	0.861271	0.285668	-0.720998	0.535265	-0.544388	-0.724625	-1.14005	-0.813486	-0.809169	-0.566112	-0.773495	-0.882463
Adlercreutzia caecimuris	0.611092	1.35088	1.34661	1.6548	-0.384994	0.0712194	0.382294	-0.337764	1.26175	-0.18301	-0.217655	-0.524362	2.75112	-0.791308	-0.825767	-0.79579	-0.790668	-0.813274	-0.779328	-0.433391	-0.83005	-0.454494	-0.209183	-0.0114242	-0.503526	0.575033	-0.233193	0.23376	3.28374	-0.409051	1.13284	-0.378296	-0.64094	-0.83005	-0.591199	-0.785349	-0.659846	-0.531879	-0.709339
Desulfovibrio sp. G05XVII	2.54698	2.45499	-0.229905	2.04808	-0.414179	1.43169	0.431565	0.0968482	-0.510987	-0.40301	-0.494654	-0.502678	3.20711	-0.458871	-0.463944	-0.490671	-0.504764	-0.516395	-0.535561	-0.114695	1.47813	-0.469507	-0.504448	-0.52682	-0.359715	0.0246151	-0.535561	-0.535561	-0.263891	-0.456332	-0.38531	-0.406437	-0.533026	-0.535561	-0.527367	-0.535561	-0.518865	-0.535561	-0.450173
Candidatus Saccharimonas sp.	1.76651	2.10849	2.2916	4.40275	-0.315732	-0.0901027	0.647422	-0.116408	0.245662	-0.03374	-0.176661	-0.485451	0.484664	-0.504602	-0.497089	-0.498912	-0.488348	-0.504602	-0.504602	-0.369062	-0.504602	-0.260472	-0.358564	-0.385882	-0.222622	-0.354967	-0.387705	-0.142853	-0.324919	-0.450222	-0.339309	-0.46754	-0.504602	-0.499797	-0.353213	-0.305554	-0.498223	-0.496132	-0.504602
Pediococcus acidilactici	-0.225445	-0.192343	1.67523	-0.546979	-0.673538	0.0321058	0.313919	-0.4689	-0.241912	0.0908274	2.92251	-0.718615	-0.150298	-0.698371	-0.750522	2.42614	-0.695711	-0.781045	-0.603115	-0.366927	-0.418275	0.456939	2.0461	-0.642081	-0.382114	-0.617207	-0.550146	-0.385983	-0.0525005	-0.64628	-0.102784	-0.591502	-0.0892603	-0.353571	0.152011	0.27674	-0.770627	2.90663	-0.583106
Hungatella hathewayi	0.092054	0.505523	-0.546354	0.0578537	-0.364649	1.43337	-0.446598	0.973464	-0.16636	-0.55215	-0.761215	-0.754062	0.550913	-0.552065	-0.790492	-0.429827	-0.610631	-0.772664	-0.290509	-0.74049	0.278921	-0.19222	0.952289	-0.517526	0.623264	0.221688	-0.782453	-0.458935	4.30033	2.33775	0.393306	0.765956	-0.545419	-0.696244	-0.438775	-0.772056	-0.761933	-0.430364	-0.112682
Lactobacillus sp. L-YJ	0.422866	-0.194205	0.113493	-0.746968	-0.707583	-0.165877	-0.102883	-0.645557	-0.759279	0.0420069	1.22696	-0.742101	-0.777161	-0.779735	-0.780898	-0.621677	-0.780096	-0.780906	-0.670793	-0.763167	-0.716177	0.405363	-0.389557	0.954068	-0.729612	1.94198	0.617222	0.958548	3.04946	0.410795	0.225356	2.28908	-0.633705	-0.764425	-0.612747	2.28153	-0.630228	-0.212327	-0.231063
Lentilactobacillus hilgardii	-0.584658	-0.549239	1.26409	-0.823148	-0.747075	-0.652905	-0.415918	-0.825608	-0.85809	-0.69695	1.82226	-0.0563978	-0.194277	-0.864671	-0.864671	-0.802014	-0.855761	-0.851474	3.15609	-0.548388	-0.810395	1.51612	0.896439	0.442044	-0.816468	1.02659	2.01109	1.07383	1.55886	-0.146304	0.22239	-0.114097	-0.233337	-0.668579	-0.066339	0.463804	-0.617542	-0.376338	-0.412967
Blautia wexlerae	0.535382	-0.218058	-0.237169	-0.287987	-0.352599	-0.158193	-0.0811775	0.671527	-0.396299	-0.429906	-0.464627	-0.431993	0.119585	-0.445315	-0.464739	-0.401552	-0.335004	-0.354111	1.10689	-0.383281	4.87895	-0.378225	-0.426121	-0.453007	-0.349193	-0.434198	-0.401102	-0.336137	-0.411505	-0.30902	-0.442817	-0.425482	2.46279	0.630531	-0.433797	-0.429809	-0.381226	-0.458457	1.10646
Serratia proteamaculans	-0.41312	0.111702	-0.439205	-0.289097	0.669868	-0.0401929	-0.15938	-0.292659	-0.408867	-0.435622	-0.43302	-0.202405	-0.275176	0.0990814	-0.371047	-0.215931	-0.110619	-0.400591	-0.449762	-0.361143	4.62866	-0.239545	0.0784558	-0.313997	-0.365454	-0.439779	-0.424225	-0.433495	-0.331083	0.378048	3.24716	1.22227	-0.351175	-0.430956	-0.437263	-0.430285	-0.383842	-0.449762	-0.106536
Desulfomicrobium sp. P004A	-0.414462	-0.344289	-0.491667	-0.485135	-0.450114	-0.423677	-0.467955	-0.401409	-0.388097	-0.465098	-0.377601	-0.0378812	-0.217538	0.45701	-0.331917	-0.250764	-0.250399	-0.301999	-0.487376	1.82045	5.13947	-0.241001	0.0923365	-0.424377	-0.179344	-0.224706	-0.432858	-0.366588	1.59998	0.0365479	0.460726	1.06317	-0.417691	-0.47358	-0.0383203	-0.407192	-0.377633	-0.35539	-0.143632
Akkermansia muciniphila	-0.474152	-0.147425	-0.729793	0.917658	-0.783802	0.185847	0.349157	-0.6292	1.36153	0.687753	-0.72352	-0.556414	-0.714085	-0.718616	-0.773116	-0.786573	-0.501229	-0.757234	-0.648251	-0.535641	0.556866	-0.759837	-0.712464	2.70824	2.84583	-0.322246	-0.679179	-0.481326	-0.528306	0.117971	0.269157	-0.374756	-0.615444	0.695464	0.468904	-0.215225	0.386219	-0.341211	2.95844
Heminiphilus faecis	-0.24897	-0.207489	-0.268249	-0.237784	0.0682246	-0.234267	-0.226545	-0.0859933	-0.1413	-0.235857	-0.302875	-0.307964	-0.307964	-0.307964	-0.307964	-0.307964	-0.307964	-0.307964	-0.307964	-0.307964	-0.303636	-0.307964	-0.293885	-0.301884	-0.28618	-0.294611	-0.307964	-0.298898	-0.289067	1.46879	-0.307964	-0.135638	-0.256253	5.20251	-0.281262	-0.307964	0.0139115	-0.301036	2.48178
Bacteroides thetaiotaomicron	-0.190987	-0.200763	-0.203018	-0.190187	-0.201604	-0.203018	-0.203018	-0.173232	-0.18008	-0.202089	-0.203018	-0.203018	-0.199045	-0.154649	-0.200121	-0.203018	-0.126857	-0.188619	-0.171355	-0.203018	0.77241	-0.19161	-0.202012	-0.203018	-0.203018	-0.203018	-0.203018	-0.203018	-0.203018	-0.187294	-0.192701	-0.203018	-0.183977	6.00686	-0.112737	-0.197204	-0.150385	-0.201929	0.0624129
Bacteroides caccae	-0.192837	-0.110866	-0.19615	-0.208553	0.15569	-0.165091	-0.107755	-0.110516	-0.136487	-0.142342	-0.205487	-0.208553	-0.208553	-0.208553	-0.208553	-0.208553	-0.208553	-0.208553	-0.195964	-0.208553	-0.0351832	-0.208553	-0.208553	-0.0108121	-0.186943	-0.186437	-0.208553	-0.0847861	-0.208553	0.000413593	-0.207622	-0.0978462	-0.208553	6.06639	-0.205756	-0.205878	-0.1467	-0.208553	-0.162748
Mucispirillum schaedleri	-0.233291	-0.234282	-0.233066	-0.248575	0.803615	-0.239582	-0.231795	-0.193317	-0.243568	-0.248575	-0.248575	-0.184203	-0.248575	0.0562392	-0.235284	-0.0841894	0.154724	-0.207578	-0.248575	-0.238833	-0.248575	-0.225606	-0.218587	-0.164883	-0.240318	-0.241731	-0.236852	-0.248575	-0.24304	0.326499	-0.0919903	5.95801	-0.244789	-0.248575	-0.209134	0.101694	-0.244173	-0.248575	-0.243513
Porphyromonas endodontalis	-0.510086	0.136159	-0.873989	-0.347767	0.9682	-0.297192	-0.105076	1.15911	0.0867168	-0.421231	0.0727195	-0.862317	-0.842496	-0.773678	-0.928034	-0.936994	-0.716078	-0.937555	-0.936804	-0.853592	-0.776017	-0.41754	-0.537377	-0.00844675	-0.717547	-0.744612	-0.880098	-0.816531	-0.891779	2.00901	0.659512	2.21849	0.785909	2.32608	1.72393	1.44429	1.35799	0.391632	0.793094
Maribacter sp. SW145	-0.607684	0.0496237	-0.857451	-0.349351	1.2366	-0.319461	0.238221	-0.00465817	-0.635872	-0.156831	0.514729	-0.311662	-0.770584	0.0735028	-0.904008	-0.945791	-0.581414	-0.904247	-0.928873	-0.733354	-0.782696	-0.114694	-0.119093	1.64703	-0.630692	-0.576976	-0.120284	-0.695805	-0.340851	0.657107	1.33052	0.590353	0.799314	-0.842462	3.93753	2.15718	0.574176	-0.583065	0.0119737
Prevotellamassilia timonensis	-0.427784	-0.333935	-0.441709	-0.409169	1.01315	-0.432097	-0.326977	0.277196	-0.176536	-0.136159	0.0584828	-0.47189	-0.147307	-0.47189	-0.47189	-0.47189	-0.47189	-0.47189	-0.47189	-0.47189	-0.41112	-0.374649	3.80599	-0.395288	-0.286457	-0.46468	-0.47189	-0.47189	-0.466788	0.4463	-0.463546	-0.0231918	-0.292143	-0.322484	3.72308	1.78354	0.574953	-0.337209	-0.294565
Porphyromonas catoniae	-0.386038	0.534846	-0.703698	-0.259578	2.01898	0.147323	0.15685	2.2675	-0.145071	-0.0584305	-0.0418523	-0.758772	-0.638078	-0.500685	-0.770875	-0.78625	-0.629831	-0.78441	-0.765743	-0.714483	-0.674514	4.1581	-0.0563639	-0.167227	-0.628729	-0.70306	-0.688522	-0.618837	-0.705958	0.709504	0.0919489	0.157521	0.732286	-0.602301	0.72703	0.546358	0.845863	-0.388593	0.0837892
Parabacteroides distasonis	-0.599359	0.382356	-0.6012	-0.0156612	3.67953	0.29545	0.913946	2.65904	2.48795	0.00723261	-0.585669	-0.20784	-0.676795	-0.345285	-0.737777	-0.788648	-0.272802	-0.781569	-0.785125	-0.743335	1.34892	-0.161431	-0.569662	-0.0327224	-0.616275	-0.663389	-0.632471	-0.751206	-0.765235	0.310439	-0.620172	0.273678	-0.160548	0.368191	-0.0286361	-0.0753543	-0.259293	-0.303352	0.0540787
Alloprevotella tannerae	-0.598074	0.673099	-0.733608	-0.62412	4.3632	0.0272636	0.535585	1.46265	1.94045	0.0872807	-0.0982879	-0.61381	-0.671163	0.800452	-0.427955	-0.752182	-0.715652	-0.757606	-0.708892	0.0305319	-0.734065	-0.678624	-0.706894	0.0894874	-0.367355	-0.643495	-0.729618	-0.715345	-0.757606	0.889334	-0.0841302	0.087319	-0.246637	-0.409504	0.498799	1.2249	0.711634	-0.455093	-0.192275
